# Supplementary material for: Magnorolins A–L: sesquiterpenoids with diverse skeletons from the fruits of Magnolia grandiflora and their cytotoxic and anti-inflammatory activities
Source: Royal Society of Chemistry journal article supplement (doi:10.1039/d6ra02737g), 2026-05-28
Supplement: d6ra02737g1.pdf [file d6ra02737g1.pdf]

## Supplementary Information

### **Magnorolins A-L, sesquiterpenoids with diverse skeletons from the fruits of *Magnolia grandiflora* and their cytotoxic and anti-inflammatory**

Qiu-Ye Zhao<sup>a,b</sup>, Shi-Huan Yin<sup>a,b</sup>, Xin-Ying Wang<sup>a,b</sup>, Lu Sai<sup>a,b</sup>, Lin-Fen Ding<sup>b,\*</sup>, Xing-De Wu<sup>a,\*</sup>

<sup>a</sup> *Laboratory of Ethnic Medicine Resource Chemistry, Ministry of Education, Yunnan Minzu University, Kunming, 650504, China*

<sup>b</sup> *School of Pharmaceutical Sciences & Yunnan Key Laboratory of Pharmacology for Natural Products, Kunming Medical University, Kunming 650500, China*

\*Corresponding authors.

E-mail addresses: dinglinfen@kmmu.edu.cn (L.-F. Ding), wuxingdeymu@163.com (X.-D. Wu).

## Contents of Supplementary Information

|                                                                                                     |    |
|-----------------------------------------------------------------------------------------------------|----|
| <b>Figure S1.</b> $^1\text{H}$ NMR spectrum of magnolin A ( <b>1</b> ) in $\text{CDCl}_3$ .....     | 1  |
| <b>Figure S2.</b> $^{13}\text{C}$ NMR spectrum of magnolin A ( <b>1</b> ) in $\text{CDCl}_3$ .....  | 1  |
| <b>Figure S3.</b> HSQC spectrum of magnolin A ( <b>1</b> ) in $\text{CDCl}_3$ .....                 | 2  |
| <b>Figure S4.</b> COSY spectrum of magnolin A ( <b>1</b> ) in $\text{CDCl}_3$ .....                 | 2  |
| <b>Figure S5.</b> HMBC spectrum of magnolin A ( <b>1</b> ) in $\text{CDCl}_3$ .....                 | 3  |
| <b>Figure S6.</b> ROESY spectrum of magnolin A ( <b>1</b> ) in $\text{CDCl}_3$ .....                | 3  |
| <b>Figure S7.</b> HR-ESI-MS spectrum of magnolin A ( <b>1</b> ).....                                | 4  |
| <b>Figure S8.</b> IR spectrum of magnolin A ( <b>1</b> ).....                                       | 5  |
| <b>Figure S9.</b> UV spectrum of magnolin A ( <b>1</b> ).....                                       | 5  |
| <b>Figure S10.</b> $^1\text{H}$ NMR spectrum of magnolin B ( <b>2</b> ) in $\text{CDCl}_3$ .....    | 6  |
| <b>Figure S11.</b> $^1\text{H}$ NMR spectrum of magnolin B ( <b>2</b> ) in $\text{CDCl}_3$ .....    | 6  |
| <b>Figure S12.</b> HSQC spectrum of magnolin B ( <b>2</b> ) in $\text{CDCl}_3$ .....                | 7  |
| <b>Figure S13.</b> COSY spectrum of magnolin B ( <b>2</b> ) in $\text{CDCl}_3$ .....                | 7  |
| <b>Figure S14.</b> HMBC spectrum of magnolin B ( <b>2</b> ) in $\text{CDCl}_3$ .....                | 8  |
| <b>Figure S15.</b> ROESY spectrum of magnolin B ( <b>2</b> ) in $\text{CDCl}_3$ .....               | 8  |
| <b>Figure S16.</b> HR-ESI-MS spectrum of magnolin B ( <b>2</b> ).....                               | 9  |
| <b>Figure S17.</b> IR spectrum of magnolin B ( <b>2</b> ).....                                      | 10 |
| <b>Figure S18.</b> UV spectrum of magnolin B ( <b>2</b> ).....                                      | 10 |
| <b>Figure S19.</b> $^1\text{H}$ NMR spectrum of magnolin C ( <b>3</b> ) in $\text{CDCl}_3$ .....    | 11 |
| <b>Figure S20.</b> $^{13}\text{C}$ NMR spectrum of magnolin C ( <b>3</b> ) in $\text{CDCl}_3$ ..... | 11 |
| <b>Figure S21.</b> HSQC spectrum of magnolin C ( <b>3</b> ) in $\text{CDCl}_3$ .....                | 12 |
| <b>Figure S22.</b> COSY spectrum of magnolin C ( <b>3</b> ) in $\text{CDCl}_3$ .....                | 12 |
| <b>Figure S23.</b> HMBC spectrum of magnolin C ( <b>3</b> ) in $\text{CDCl}_3$ .....                | 13 |
| <b>Figure S24.</b> ROESY spectrum of magnolin C ( <b>3</b> ) in $\text{CDCl}_3$ .....               | 13 |
| <b>Figure S25.</b> HR-ESI-MS spectrum of magnolin C ( <b>3</b> ).....                               | 14 |
| <b>Figure S26.</b> IR spectrum of magnolin C ( <b>3</b> ).....                                      | 15 |
| <b>Figure S27.</b> UV spectrum of magnolin C ( <b>3</b> ).....                                      | 15 |
| <b>Figure S28.</b> $^1\text{H}$ NMR spectrum of magnolin D ( <b>5</b> ) in $\text{CDCl}_3$ .....    | 16 |

|                                                                                                      |    |
|------------------------------------------------------------------------------------------------------|----|
| <b>Figure S29.</b> $^{13}\text{C}$ NMR spectrum of magnolin D ( <b>5</b> ) in $\text{CDCl}_3$ .....  | 16 |
| <b>Figure S30.</b> HSQC spectrum of magnolin D ( <b>5</b> ) in $\text{CDCl}_3$ .....                 | 17 |
| <b>Figure S31.</b> COSY spectrum of magnolin D ( <b>5</b> ) in $\text{CDCl}_3$ .....                 | 17 |
| <b>Figure S32.</b> HMBC spectrum of magnolin D ( <b>5</b> ) in $\text{CDCl}_3$ .....                 | 18 |
| <b>Figure S33.</b> ROESY spectrum of magnolin D ( <b>5</b> ) in $\text{CDCl}_3$ .....                | 18 |
| <b>Figure S34.</b> HR-ESI-MS spectrum of magnolin D ( <b>5</b> ).....                                | 19 |
| <b>Figure S35.</b> IR spectrum of magnolin D ( <b>5</b> ).....                                       | 20 |
| <b>Figure S36.</b> UV spectrum of magnolin D ( <b>5</b> ).....                                       | 20 |
| <b>Figure S37.</b> $^1\text{H}$ NMR spectrum of magnolin E ( <b>6</b> ) in $\text{CDCl}_3$ .....     | 21 |
| <b>Figure S38.</b> $^{13}\text{C}$ NMR spectrum of magnolin E ( <b>6</b> ) in $\text{CDCl}_3$ .....  | 21 |
| <b>Figure S39.</b> HSQC spectrum of magnolin E ( <b>6</b> ) in $\text{CDCl}_3$ .....                 | 22 |
| <b>Figure S40.</b> COSY spectrum of magnolin E ( <b>6</b> ) in $\text{CDCl}_3$ .....                 | 22 |
| <b>Figure S41.</b> HMBC spectrum of magnolin E ( <b>6</b> ) in $\text{CDCl}_3$ .....                 | 23 |
| <b>Figure S42.</b> ROESY spectrum of magnolin E ( <b>6</b> ) in $\text{CDCl}_3$ .....                | 23 |
| <b>Figure S43.</b> HR-ESI-MS spectrum of magnolin E ( <b>6</b> ) .....                               | 24 |
| <b>Figure S44.</b> IR spectrum of magnolin E ( <b>6</b> ) .....                                      | 25 |
| <b>Figure S45.</b> UV spectrum of magnolin E ( <b>6</b> ) .....                                      | 25 |
| <b>Figure S46.</b> $^1\text{H}$ NMR spectrum of magnorlin F ( <b>7</b> ) in $\text{CDCl}_3$ .....    | 26 |
| <b>Figure S47.</b> $^{13}\text{C}$ NMR spectrum of magnorlin F ( <b>7</b> ) in $\text{CDCl}_3$ ..... | 26 |
| <b>Figure S48.</b> HSQC spectrum of magnorlin F ( <b>7</b> ) in $\text{CDCl}_3$ .....                | 27 |
| <b>Figure S49.</b> COSY spectrum of magnorlin F ( <b>7</b> ) in $\text{CDCl}_3$ .....                | 27 |
| <b>Figure S50.</b> HMBC spectrum of magnorlin F ( <b>7</b> ) in $\text{CDCl}_3$ .....                | 28 |
| <b>Figure S51.</b> ROESY spectrum of magnorlin F ( <b>7</b> ) in $\text{CDCl}_3$ .....               | 28 |
| <b>Figure S52.</b> HR-ESI-MS spectrum of magnolin F ( <b>7</b> ) .....                               | 29 |
| <b>Figure S53.</b> IR spectrum of magnolin F ( <b>7</b> ) .....                                      | 30 |
| <b>Figure S54.</b> UV spectrum of magnolin F ( <b>7</b> ).....                                       | 30 |
| <b>Figure S55.</b> $^1\text{H}$ NMR spectrum of magnolin G ( <b>8</b> ) in $\text{CDCl}_3$ .....     | 31 |
| <b>Figure S56.</b> $^{13}\text{C}$ NMR spectrum of magnolin G ( <b>8</b> ) in $\text{CDCl}_3$ .....  | 31 |
| <b>Figure S57.</b> HSQC spectrum of magnolin G ( <b>8</b> ) in $\text{CDCl}_3$ .....                 | 32 |
| <b>Figure S58.</b> COSY spectrum of magnolin G ( <b>8</b> ) in $\text{CDCl}_3$ .....                 | 32 |

|                                                                                                        |    |
|--------------------------------------------------------------------------------------------------------|----|
| <b>Figure S59.</b> HMBC spectrum of magnolin G ( <b>8</b> ) in CDCl <sub>3</sub> .....                 | 33 |
| <b>Figure S60.</b> ROESY spectrum of magnolin G ( <b>8</b> ) in CDCl <sub>3</sub> .....                | 33 |
| <b>Figure S61.</b> HR-ESI-MS spectrum of magnolin G ( <b>8</b> ).....                                  | 34 |
| <b>Figure S62.</b> IR spectrum of magnolin G ( <b>8</b> ).....                                         | 35 |
| <b>Figure S63.</b> UV spectrum of magnolin G ( <b>8</b> ).....                                         | 35 |
| <b>Figure S64.</b> <sup>1</sup> H NMR spectrum of magnolin H ( <b>9</b> ) in CDCl <sub>3</sub> .....   | 36 |
| <b>Figure S65.</b> <sup>13</sup> C NMR spectrum of magnolin H ( <b>9</b> ) in CDCl <sub>3</sub> .....  | 36 |
| <b>Figure S66.</b> HSQC spectrum of magnolin H ( <b>9</b> ) in CDCl <sub>3</sub> .....                 | 37 |
| <b>Figure S67.</b> COSY spectrum of magnolin H ( <b>9</b> ) in CDCl <sub>3</sub> .....                 | 37 |
| <b>Figure S68.</b> HMBC spectrum of magnolin H ( <b>9</b> ) in CDCl <sub>3</sub> .....                 | 38 |
| <b>Figure S69.</b> ROESY spectrum of magnolin H ( <b>9</b> ) in CDCl <sub>3</sub> .....                | 38 |
| <b>Figure S70.</b> HR-ESI-MS spectrum of magnolin H ( <b>9</b> ).....                                  | 39 |
| <b>Figure S71.</b> IR spectrum of magnolin H ( <b>9</b> ).....                                         | 40 |
| <b>Figure S72.</b> IR spectrum of magnolin H ( <b>9</b> ).....                                         | 40 |
| <b>Figure S73.</b> <sup>1</sup> H NMR spectrum of magnolin I ( <b>10</b> ) in CDCl <sub>3</sub> .....  | 41 |
| <b>Figure S74.</b> <sup>13</sup> C NMR spectrum of magnolin I ( <b>10</b> ) in CDCl <sub>3</sub> ..... | 41 |
| <b>Figure S75.</b> HSQC spectrum of magnolin I ( <b>10</b> ) in CDCl <sub>3</sub> .....                | 42 |
| <b>Figure S76.</b> COSY spectrum of magnolin I ( <b>10</b> ) in CDCl <sub>3</sub> .....                | 42 |
| <b>Figure S77.</b> HMBC spectrum of magnolin I ( <b>10</b> ) in CDCl <sub>3</sub> .....                | 43 |
| <b>Figure S78.</b> ROESY spectrum of magnolin I ( <b>10</b> ) in CDCl <sub>3</sub> .....               | 43 |
| <b>Figure S79.</b> HR-ESI-MS spectrum of magnolin I ( <b>10</b> ) .....                                | 44 |
| <b>Figure S80.</b> IR spectrum of magnolin I ( <b>10</b> ) .....                                       | 45 |
| <b>Figure S81.</b> UV spectrum of magnolin I ( <b>10</b> ).....                                        | 45 |
| <b>Figure S82.</b> <sup>1</sup> H NMR spectrum of magnolin J ( <b>11</b> ) in CDCl <sub>3</sub> .....  | 46 |
| <b>Figure S83.</b> <sup>13</sup> C NMR spectrum of magnolin J ( <b>11</b> ) in CDCl <sub>3</sub> ..... | 46 |
| <b>Figure S84.</b> HSQC spectrum of magnolin J ( <b>11</b> ) in CDCl <sub>3</sub> .....                | 47 |
| <b>Figure S85.</b> COSY spectrum of magnolin J ( <b>11</b> ) in CDCl <sub>3</sub> .....                | 47 |
| <b>Figure S86.</b> HMBC spectrum of magnolin J ( <b>11</b> ) in CDCl <sub>3</sub> .....                | 48 |
| <b>Figure S87.</b> ROESY spectrum of magnolin J ( <b>11</b> ) in CDCl <sub>3</sub> .....               | 48 |
| <b>Figure S88.</b> HR-ESI-MS spectrum of magnolin J ( <b>11</b> ).....                                 | 49 |

|                                                                                                                                                                |    |
|----------------------------------------------------------------------------------------------------------------------------------------------------------------|----|
| <b>Figure S89.</b> IR spectrum of magnolin J ( <b>11</b> ) .....                                                                                               | 50 |
| <b>Figure S90.</b> UV spectrum of magnolin J ( <b>11</b> ) .....                                                                                               | 50 |
| <b>Figure S91.</b> <sup>1</sup> H NMR spectrum of magnolin K ( <b>12</b> ) in CDCl <sub>3</sub> .....                                                          | 51 |
| <b>Figure S92.</b> <sup>13</sup> C NMR spectrum of magnolin K ( <b>12</b> ) in CDCl <sub>3</sub> .....                                                         | 51 |
| <b>Figure S93.</b> HSQC spectrum of magnolin K ( <b>12</b> ) in CDCl <sub>3</sub> .....                                                                        | 52 |
| <b>Figure S94.</b> COSY spectrum of magnolin K ( <b>12</b> ) in CDCl <sub>3</sub> .....                                                                        | 52 |
| <b>Figure S95.</b> HMBC spectrum of magnolin K ( <b>12</b> ) in CDCl <sub>3</sub> .....                                                                        | 53 |
| <b>Figure S96.</b> ROESY spectrum of magnolin K ( <b>12</b> ) in CDCl <sub>3</sub> .....                                                                       | 53 |
| <b>Figure S97.</b> HR-ESI-MS spectrum of magnolin K ( <b>12</b> ).....                                                                                         | 54 |
| <b>Figure S98.</b> IR spectrum of magnolin K ( <b>12</b> ).....                                                                                                | 55 |
| <b>Figure S99.</b> UV spectrum of magnolin K ( <b>12</b> ).....                                                                                                | 55 |
| <b>Figure S100.</b> <sup>1</sup> H NMR spectrum of magnolin L ( <b>15</b> ) in CD <sub>3</sub> OD .....                                                        | 56 |
| <b>Figure S101.</b> <sup>13</sup> C NMR spectrum of magnolin L ( <b>15</b> ) in CD <sub>3</sub> OD .....                                                       | 56 |
| <b>Figure S102.</b> HSQC spectrum of magnolin L ( <b>15</b> ) in CD <sub>3</sub> OD.....                                                                       | 57 |
| <b>Figure S103.</b> COSY spectrum of magnolin L ( <b>15</b> ) in CD <sub>3</sub> OD.....                                                                       | 57 |
| <b>Figure S104.</b> HMBC spectrum of magnolin L ( <b>15</b> ) in CD <sub>3</sub> OD.....                                                                       | 58 |
| <b>Figure S105.</b> ROESY spectrum of magnolin L ( <b>15</b> ) in CD <sub>3</sub> OD .....                                                                     | 58 |
| <b>Figure S106.</b> HR-ESI-MS spectrum of magnolin L ( <b>15</b> ) .....                                                                                       | 59 |
| <b>Figure S107.</b> IR spectrum of magnolin L ( <b>15</b> ) .....                                                                                              | 60 |
| <b>Figure S108.</b> UV spectrum of magnolin L ( <b>15</b> ) .....                                                                                              | 60 |
| <b>Figure S109.</b> Conformers of isomer <b>1</b> .....                                                                                                        | 61 |
| <b>Table S1.</b> Important thermodynamic parameters and Boltzmann distributions of the optimized isomer <b>1</b> at B3LYP/6-31G (d, p) level in gas phase..... | 61 |
| <b>Table S2.</b> Optimized Z-matrixes of isomer <b>1</b> in the gas phase (Å) at B3LYP/6-31G (d) level. ....                                                   | 61 |
| <b>Figure S110.</b> Conformers of isomer <b>2</b> .....                                                                                                        | 63 |
| <b>Table S3.</b> Important thermodynamic parameters and Boltzmann distributions of the optimized isomer <b>2</b> at B3LYP/6-31G (d, p) level in gas phase..... | 63 |
| <b>Table S4.</b> Optimized Z-matrixes of isomer <b>2</b> in the gas phase (Å) at B3LYP/6-31G (d) level. ....                                                   | 63 |

|                                                                                                                                                                  |    |
|------------------------------------------------------------------------------------------------------------------------------------------------------------------|----|
| <b>Figure S111.</b> Conformers of isomer <b>5</b> .....                                                                                                          | 67 |
| <b>Table S5.</b> Important thermodynamic parameters and Boltzmann distributions of the optimized isomer <b>5</b> at B3LYP/6-31G (d, p) level in gas phase.....   | 67 |
| <b>Table S6.</b> Optimized Z-matrixes of isomer <b>5</b> in the gas phase (Å) at B3LYP/6-31G (d) level. ....                                                     | 67 |
| <b>Figure S112.</b> Conformers of isomer <b>6</b> .....                                                                                                          | 71 |
| <b>Table S7.</b> Important thermodynamic parameters and Boltzmann distributions of the optimized isomer <b>6</b> at B3LYP/6-31G (d, p) level in gas phase.....   | 71 |
| <b>Table S8.</b> Optimized Z-matrixes of isomer <b>6</b> in the gas phase (Å) at B3LYP/6-31G (d) level. ....                                                     | 71 |
| <b>Figure S113.</b> Conformers of isomer <b>7</b> .....                                                                                                          | 74 |
| <b>Table S9.</b> Important thermodynamic parameters and Boltzmann distributions of the optimized isomer <b>7</b> at B3LYP/6-31G (d, p) level in gas phase.....   | 75 |
| <b>Table S10.</b> Optimized Z-matrixes of isomer <b>7</b> in the gas phase (Å) at B3LYP/6-31G (d) level. ....                                                    | 75 |
| <b>Figure S114.</b> Conformers of isomer <b>8</b> .....                                                                                                          | 77 |
| <b>Table S11.</b> Important thermodynamic parameters and Boltzmann distributions of the optimized isomer <b>8</b> at B3LYP/6-31G (d, p) level in gas phase.....  | 77 |
| <b>Table S12.</b> Optimized Z-matrixes of isomer <b>8</b> in the gas phase (Å) at B3LYP/6-31G (d) level. ....                                                    | 78 |
| <b>Figure S115.</b> Conformers of isomer <b>9</b> .....                                                                                                          | 80 |
| <b>Table S13.</b> Important thermodynamic parameters and Boltzmann distributions of the optimized isomer <b>9</b> at B3LYP/6-31G (d, p) level in gas phase.....  | 80 |
| <b>Table S14.</b> Optimized Z-matrixes of isomer <b>9</b> in the gas phase (Å) at B3LYP/6-31G (d) level. ....                                                    | 80 |
| <b>Figure S116.</b> Conformers of isomer <b>10</b> .....                                                                                                         | 83 |
| <b>Table S15.</b> Important thermodynamic parameters and Boltzmann distributions of the optimized isomer <b>10</b> at B3LYP/6-31G (d, p) level in gas phase..... | 83 |
| <b>Table S16.</b> Optimized Z-matrixes of isomer <b>10</b> in the gas phase (Å) at B3LYP/6-31G (d) level. ....                                                   | 84 |

|                                                                                                                                                                                                                                                                                                                                                                                                                  |     |
|------------------------------------------------------------------------------------------------------------------------------------------------------------------------------------------------------------------------------------------------------------------------------------------------------------------------------------------------------------------------------------------------------------------|-----|
| <b>Figure S117.</b> Conformers of isomer <b>11</b> .....                                                                                                                                                                                                                                                                                                                                                         | 88  |
| <b>Table S17.</b> Important thermodynamic parameters and Boltzmann distributions of the optimized isomer <b>11</b> at B3LYP/6-31G (d, p) level in gas phase.....                                                                                                                                                                                                                                                 | 88  |
| <b>Table S18.</b> Optimized Z-matrixes of isomer <b>11</b> in the gas phase (Å) at B3LYP/6-31G (d) level. ....                                                                                                                                                                                                                                                                                                   | 89  |
| <b>Figure S118.</b> Conformers of isomer <b>12</b> .....                                                                                                                                                                                                                                                                                                                                                         | 92  |
| <b>Table S19.</b> Important thermodynamic parameters and Boltzmann distributions of the optimized isomer <b>12</b> at B3LYP/6-31G (d, p) level in gas phase.....                                                                                                                                                                                                                                                 | 92  |
| <b>Table S20.</b> Optimized Z-matrixes of isomer <b>12</b> in the gas phase (Å) at B3LYP/6-31G (d) level. ....                                                                                                                                                                                                                                                                                                   | 92  |
| <b>Figure S119.</b> Conformers of isomer <b>15</b> .....                                                                                                                                                                                                                                                                                                                                                         | 95  |
| <b>Table S21.</b> Important thermodynamic parameters and Boltzmann distributions of the optimized isomer <b>15</b> at B3LYP/6-31G (d, p) level in gas phase.....                                                                                                                                                                                                                                                 | 95  |
| <b>Table S22.</b> Optimized Z-matrixes of isomer <b>15</b> in the gas phase (Å) at B3LYP/6-31G (d) level. ....                                                                                                                                                                                                                                                                                                   | 95  |
| <b>Table S23.</b> Energy analysis for (1 <i>R</i> , 4 <i>R</i> , 5 <i>S</i> , 6 <i>R</i> , 7 <i>R</i> , 10 <i>S</i> , 11 <i>R</i> <sup>*</sup> )- <b>8a</b> and (1 <i>R</i> , 4 <i>R</i> , 5 <i>S</i> , 6 <i>R</i> , 7 <i>R</i> , 10 <i>S</i> , 11 <i>S</i> <sup>*</sup> )- <b>8b</b> .....                                                                                                                      | 98  |
| <b>Figure S120.</b> mPW1PW91/6-311+G (d, p) (chloroform) optimized lowest energy conformers for (1 <i>R</i> , 4 <i>R</i> , 5 <i>S</i> , 6 <i>R</i> , 7 <i>R</i> , 10 <i>S</i> , 11 <i>R</i> <sup>*</sup> )- <b>8a</b> and (1 <i>R</i> , 4 <i>R</i> , 5 <i>S</i> , 6 <i>R</i> , 7 <i>R</i> , 10 <i>S</i> , 11 <i>S</i> <sup>*</sup> )- <b>8b</b> .....                                                            | 99  |
| <b>Figure S121.</b> DP4+ evaluation of theoretical and experimental data for (1 <i>R</i> , 4 <i>R</i> , 5 <i>S</i> , 6 <i>R</i> , 7 <i>R</i> , 10 <i>S</i> , 11 <i>R</i> <sup>*</sup> )- <b>8a</b> and (1 <i>R</i> , 4 <i>R</i> , 5 <i>S</i> , 6 <i>R</i> , 7 <i>R</i> , 10 <i>S</i> , 11 <i>S</i> <sup>*</sup> )- <b>8b</b> .....                                                                               | 99  |
| <b>Table S24.</b> Calculated (calc.) and experimental (exp.) <sup>13</sup> C NMR chemical shift values of (1 <i>R</i> , 4 <i>R</i> , 5 <i>S</i> , 6 <i>R</i> , 7 <i>R</i> , 10 <i>S</i> , 11 <i>R</i> <sup>*</sup> )- <b>8a</b> and (1 <i>R</i> , 4 <i>R</i> , 5 <i>S</i> , 6 <i>R</i> , 7 <i>R</i> , 10 <i>S</i> , 11 <i>S</i> <sup>*</sup> )- <b>8b</b> at the mPW1PW91/6-311+G(d, p) level in chloroform..... | 100 |
| <b>Table S25.</b> Calculated (calc.) and experimental (exp.) <sup>1</sup> H NMR chemical shift values of (1 <i>R</i> , 4 <i>R</i> , 5 <i>S</i> , 6 <i>R</i> , 7 <i>R</i> , 10 <i>S</i> , 11 <i>R</i> <sup>*</sup> )- <b>8a</b> and (1 <i>R</i> , 4 <i>R</i> , 5 <i>S</i> , 6 <i>R</i> , 7 <i>R</i> , 10 <i>S</i> , 11 <i>S</i> <sup>*</sup> )- <b>8b</b> at the mPW1PW91/6-311+G (d, p) level in chloroform..... | 100 |
| <b>Figure S122.</b> Linear correlations between the experimental and calculated <sup>13</sup> C NMR chemical shifts for two possible isomers of (1 <i>R</i> , 4 <i>R</i> , 5 <i>S</i> , 6 <i>R</i> , 7 <i>R</i> , 10 <i>S</i> , 11 <i>R</i> <sup>*</sup> )- <b>8a</b> and                                                                                                                                        |     |

|                                                                                                                                                                                                                                                                                                                                                                                                                      |     |
|----------------------------------------------------------------------------------------------------------------------------------------------------------------------------------------------------------------------------------------------------------------------------------------------------------------------------------------------------------------------------------------------------------------------|-----|
| (1 <i>R</i> , 4 <i>R</i> , 5 <i>S</i> , 6 <i>R</i> , 7 <i>R</i> , 10 <i>S</i> , 11 <i>S</i> <sup>*</sup> )- <b>8b</b> at the PCM/ mPW1PW91/6-311+G (d, p) level.                                                                                                                                                                                                                                                     | 101 |
| <b>Table S26.</b> Energy analysis for (1 <i>R</i> , 4 <i>R</i> , 5 <i>S</i> , 6 <i>S</i> , 7 <i>R</i> , 11 <i>R</i> <sup>*</sup> )- <b>11a</b> and (1 <i>R</i> , 4 <i>R</i> , 5 <i>S</i> , 6 <i>S</i> , 7 <i>R</i> , 11 <i>S</i> <sup>*</sup> )- <b>11b</b> .....                                                                                                                                                    | 101 |
| <b>Figure S123.</b> mPW1PW91/6-311+G (d, p) (chloroform) optimized lowest energy conformers for (1 <i>R</i> , 4 <i>R</i> , 5 <i>S</i> , 6 <i>S</i> , 7 <i>R</i> , 11 <i>R</i> <sup>*</sup> )- <b>11a</b> and (1 <i>R</i> , 4 <i>R</i> , 5 <i>S</i> , 6 <i>S</i> , 7 <i>R</i> , 11 <i>S</i> <sup>*</sup> )- <b>11b</b>                                                                                                | 102 |
| <b>Figure S124.</b> DP4+ evaluation of theoretical and experimental data for (1 <i>R</i> , 4 <i>R</i> , 5 <i>S</i> , 6 <i>S</i> , 7 <i>R</i> , 11 <i>R</i> <sup>*</sup> )- <b>11a</b> and (1 <i>R</i> , 4 <i>R</i> , 5 <i>S</i> , 6 <i>S</i> , 7 <i>R</i> , 11 <i>S</i> <sup>*</sup> )- <b>11b</b> .....                                                                                                             | 102 |
| <b>Table S27.</b> Calculated (calc.) and experimental (exp.) <sup>13</sup> C NMR chemical shift values of (1 <i>R</i> , 4 <i>R</i> , 5 <i>S</i> , 6 <i>S</i> , 7 <i>R</i> , 11 <i>R</i> <sup>*</sup> )- <b>11a</b> and (1 <i>R</i> , 4 <i>R</i> , 5 <i>S</i> , 6 <i>S</i> , 7 <i>R</i> , 11 <i>S</i> <sup>*</sup> )- <b>11b</b> at the mPW1PW91/6-311+G(d, p) level in chloroform.....                               | 103 |
| <b>Table S28.</b> Calculated (calc.) and experimental (exp.) <sup>1</sup> H NMR chemical shift values of (1 <i>R</i> , 4 <i>R</i> , 5 <i>S</i> , 6 <i>S</i> , 7 <i>R</i> , 11 <i>R</i> <sup>*</sup> )- <b>11a</b> and (1 <i>R</i> , 4 <i>R</i> , 5 <i>S</i> , 6 <i>S</i> , 7 <i>R</i> , 11 <i>S</i> <sup>*</sup> )- <b>11b</b> at the mPW1PW91/6-311+G (d, p) level in chloroform.....                               | 103 |
| <b>Figure S125.</b> Linear correlations between the experimental and calculated <sup>13</sup> C NMR chemical shifts for two possible isomers of (1 <i>R</i> , 4 <i>R</i> , 5 <i>S</i> , 6 <i>S</i> , 7 <i>R</i> , 11 <i>R</i> <sup>*</sup> )- <b>11a</b> and (1 <i>R</i> , 4 <i>R</i> , 5 <i>S</i> , 6 <i>S</i> , 7 <i>R</i> , 11 <i>S</i> <sup>*</sup> )- <b>11b</b> at the PCM/ mPW1PW91/6-311+G (d, p) level..... | 104 |
| <b>Table S29.</b> Energy analysis for (1 <i>R</i> , 4 <i>R</i> , 5 <i>S</i> , 6 <i>S</i> , 7 <i>R</i> , 11 <i>R</i> <sup>*</sup> )- <b>12a</b> and (1 <i>R</i> , 4 <i>R</i> , 5 <i>S</i> , 6 <i>S</i> , 7 <i>R</i> , 11 <i>S</i> <sup>*</sup> )- <b>12b</b> .....                                                                                                                                                    | 104 |
| <b>Figure S126.</b> mPW1PW91/6-311+G (d, p) (chloroform) optimized lowest energy conformers for (1 <i>R</i> , 4 <i>R</i> , 5 <i>S</i> , 6 <i>S</i> , 7 <i>R</i> , 11 <i>R</i> <sup>*</sup> )- <b>12a</b> and (1 <i>R</i> , 4 <i>R</i> , 5 <i>S</i> , 6 <i>S</i> , 7 <i>R</i> , 11 <i>S</i> <sup>*</sup> )- <b>12b</b>                                                                                                | 104 |
| <b>Figure S127.</b> DP4+ evaluation of theoretical and experimental data for (1 <i>R</i> , 4 <i>R</i> , 5 <i>S</i> , 6 <i>S</i> , 7 <i>R</i> , 11 <i>R</i> <sup>*</sup> )- <b>12a</b> and (1 <i>R</i> , 4 <i>R</i> , 5 <i>S</i> , 6 <i>S</i> , 7 <i>R</i> , 11 <i>S</i> <sup>*</sup> )- <b>12b</b> .....                                                                                                             | 105 |
| <b>Table S30.</b> Calculated (calc.) and experimental (exp.) <sup>13</sup> C NMR chemical shift values of (1 <i>R</i> , 4 <i>R</i> , 5 <i>S</i> , 6 <i>S</i> , 7 <i>R</i> , 11 <i>R</i> <sup>*</sup> )- <b>12a</b> and (1 <i>R</i> , 4 <i>R</i> , 5 <i>S</i> , 6 <i>S</i> , 7 <i>R</i> , 11 <i>S</i> <sup>*</sup> )- <b>12b</b> at the mPW1PW91/6-311+G(d, p) level in acetone .....                                 | 106 |
| <b>Table S31.</b> Calculated (calc.) and experimental (exp.) <sup>1</sup> H NMR chemical shift values of (1 <i>R</i> , 4 <i>R</i> , 5 <i>S</i> , 6 <i>S</i> , 7 <i>R</i> , 11 <i>R</i> <sup>*</sup> )- <b>12a</b> and (1 <i>R</i> , 4 <i>R</i> , 5 <i>S</i> , 6 <i>S</i> , 7 <i>R</i> , 11 <i>S</i> <sup>*</sup> )- <b>12b</b> at the mPW1PW91/6-311+G (d, p) level in acetone .....                                 | 106 |
| <b>Figure S128.</b> Linear correlations between the experimental and calculated <sup>13</sup> C NMR chemical shifts for two possible isomers of (1 <i>R</i> , 4 <i>R</i> , 5 <i>S</i> , 6 <i>S</i> , 7 <i>R</i> , 11 <i>R</i> <sup>*</sup> )- <b>12a</b> and (1 <i>R</i> ,                                                                                                                                           |     |

4*R*, 5*S*, 6*S*, 7*R*, 11*S*\*)-12b at the PCM/ mPW1PW91/6-311+G (d, p) level.....107

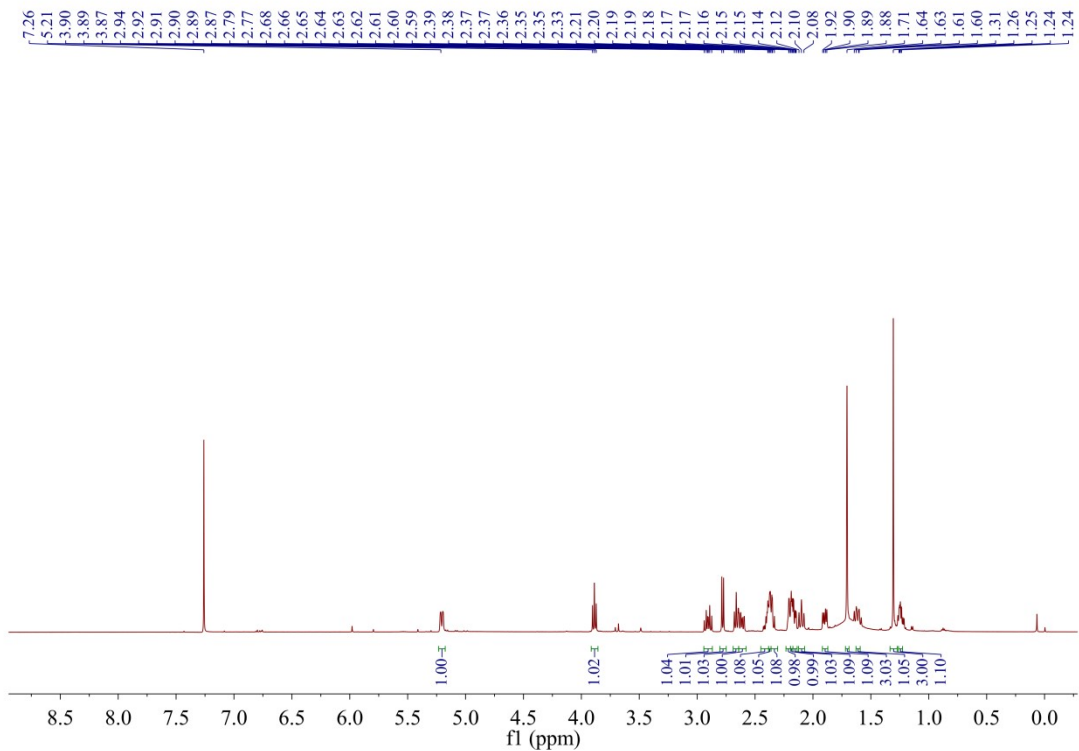

**Figure S1.**  $^1\text{H}$  NMR spectrum of magnolin A (**1**) in  $\text{CDCl}_3$

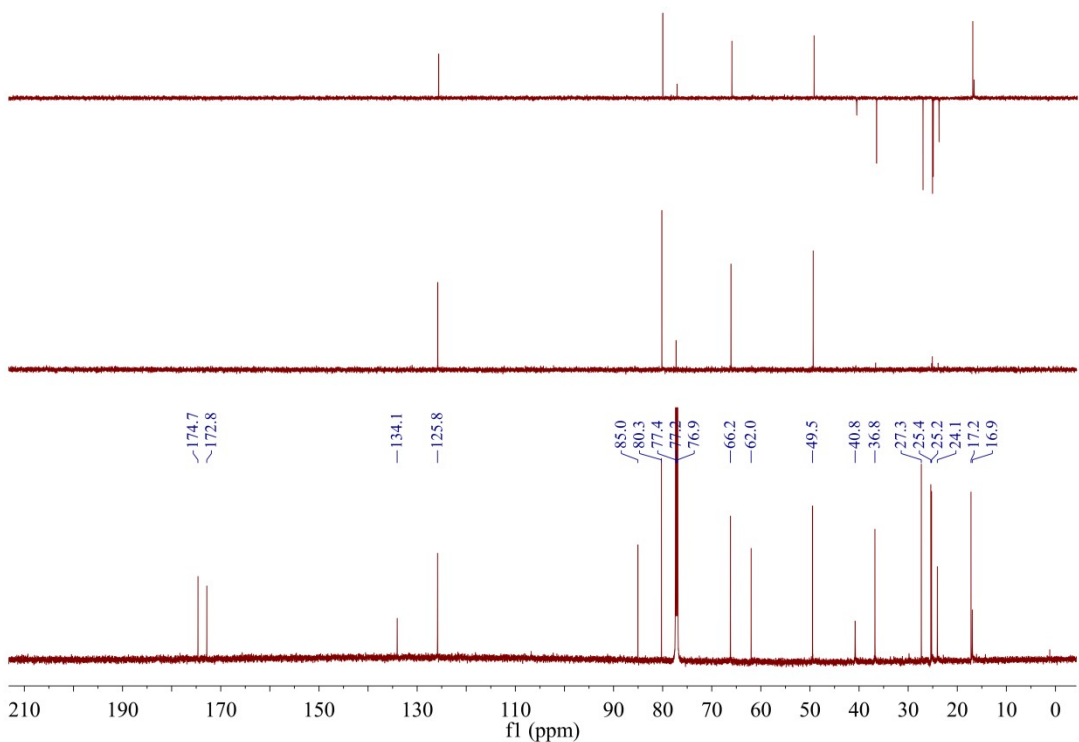

**Figure S2.**  $^{13}\text{C}$  NMR spectrum of magnolin A (**1**) in  $\text{CDCl}_3$

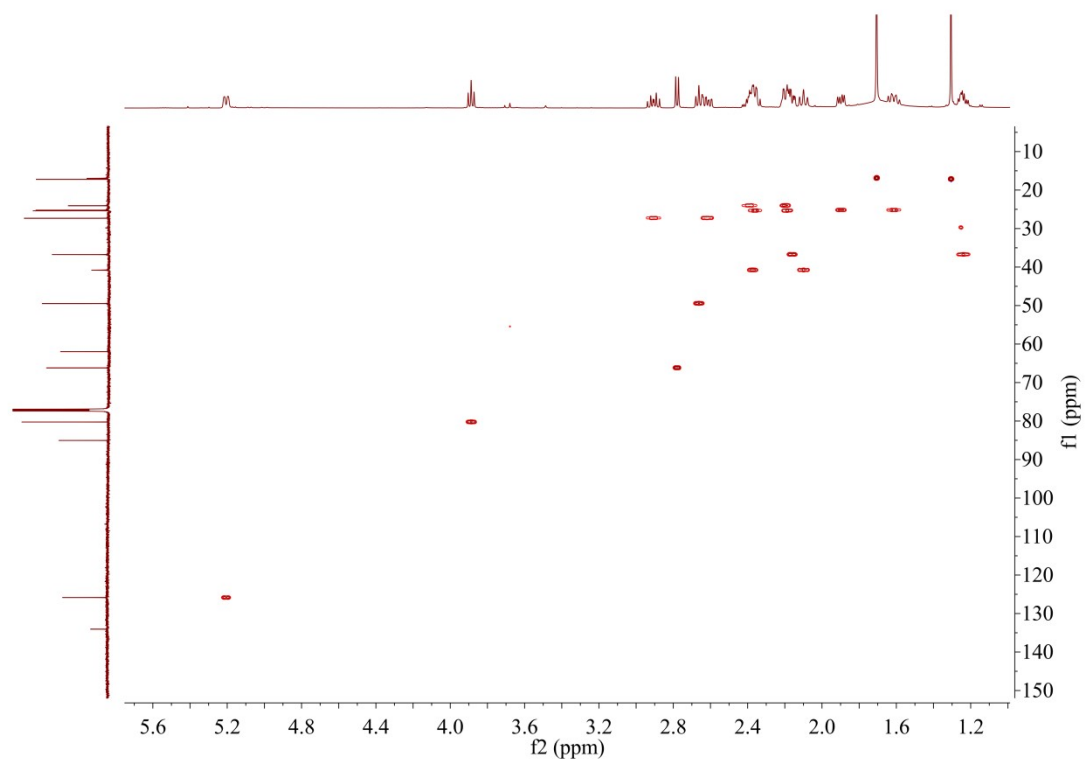

**Figure S3.** HSQC spectrum of magnolin A (**1**) in  $\text{CDCl}_3$

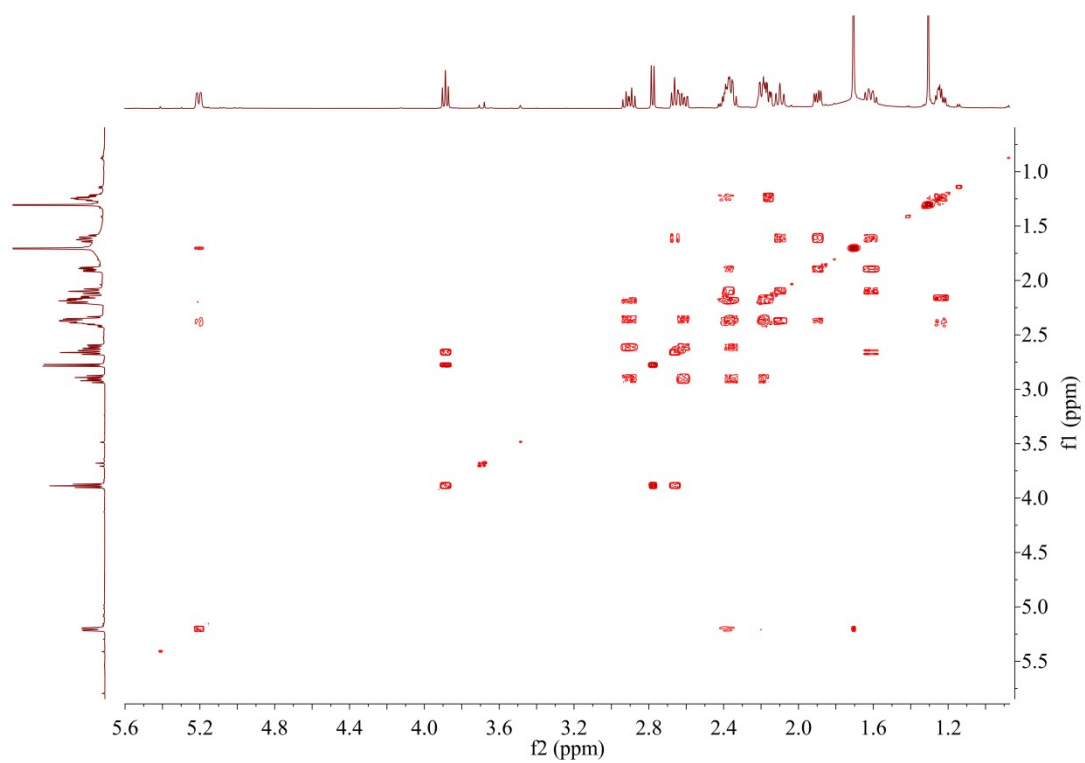

**Figure S4.** COSY spectrum of magnolin A (**1**) in  $\text{CDCl}_3$

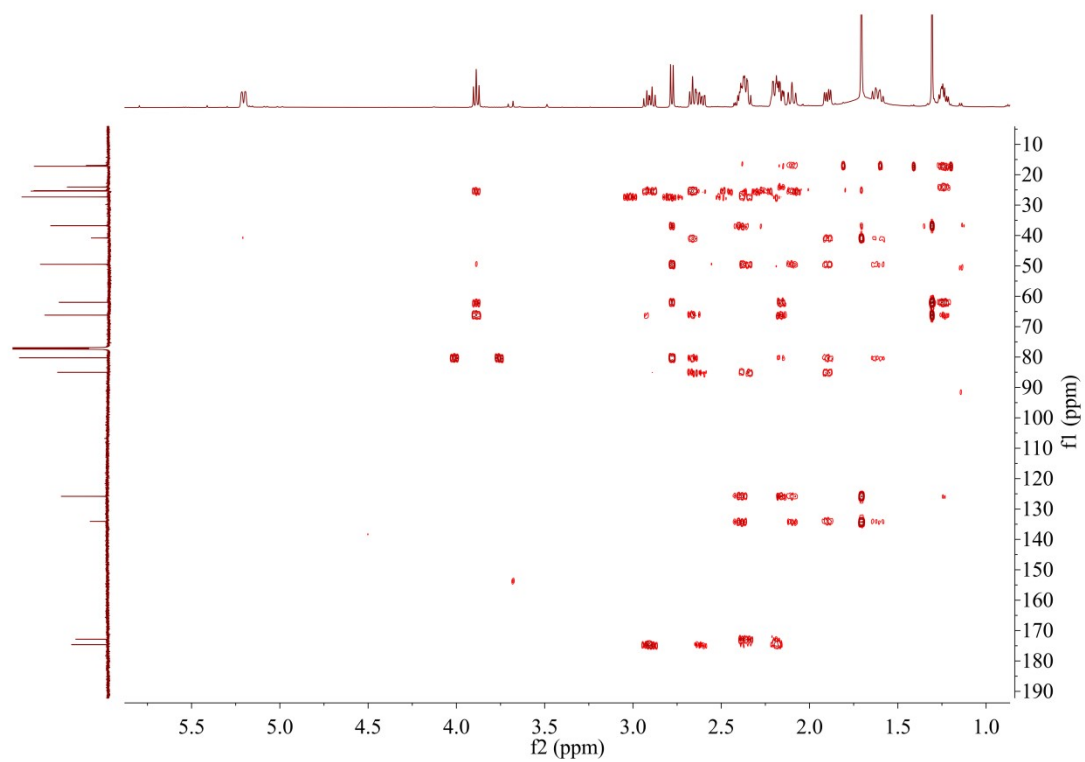

**Figure S5.** HMBC spectrum of magnolin A (**1**) in  $\text{CDCl}_3$

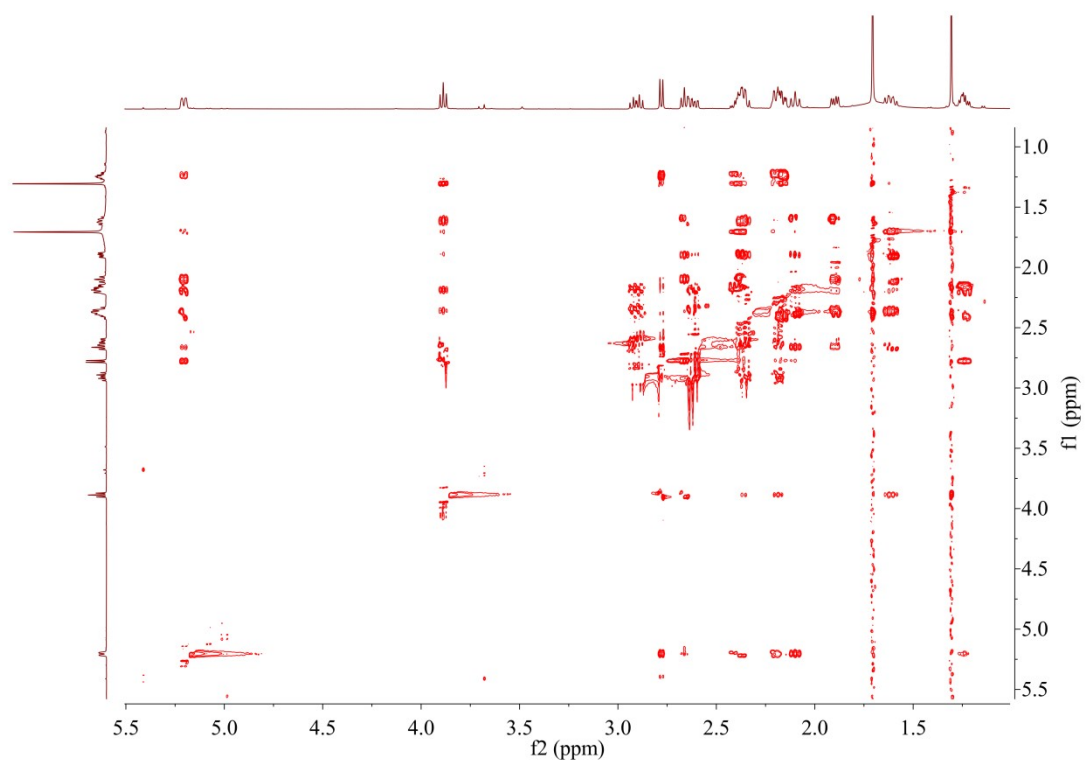

**Figure S6.** ROESY spectrum of magnolin A (**1**) in  $\text{CDCl}_3$

Data File: D:\DATA\2025\1104\fwxz-138.lcd

| Elmt | Val. | Min | Max | Elmt | Val. | Min | Max | Elmt | Val. | Min | Max | Use Adduct |
|------|------|-----|-----|------|------|-----|-----|------|------|-----|-----|------------|
| H    | 1    | 5   | 100 | N    | 3    | 0   | 10  | Si   | 4    | 0   | 0   | H          |
| B    | 3    | 0   | 0   | O    | 2    | 0   | 20  | S    | 2    | 0   | 0   | Cl         |
| C    | 4    | 10  | 50  | F    | 1    | 0   | 0   | Cl   | 1    | 0   | 0   |            |

Error Margin (ppm): 5  
 DBE Range: -2.0 - 1000.0  
 Electron Ions: both  
 HC Ratio: unlimited  
 Apply N Rule: no  
 Use MSn Info: no  
 Max Isotopes: all  
 Isotope RI (%): 1.00  
 Isotope Res: 10000  
 MSn Iso RI (%): 75.00  
 MSn Logic Mode: AND  
 Max Results: 50

Event#: 2 MS(E-) Ret. Time : 0.360 -> 0.453 Scan# : 56 -> 70

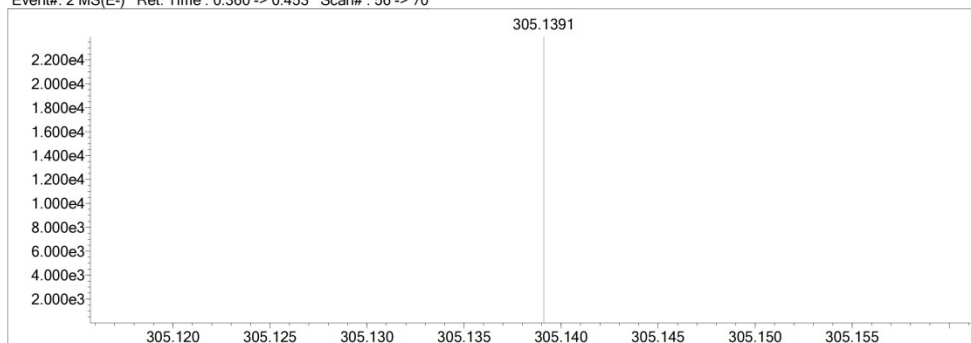

Measured region for 305.1391 m/z

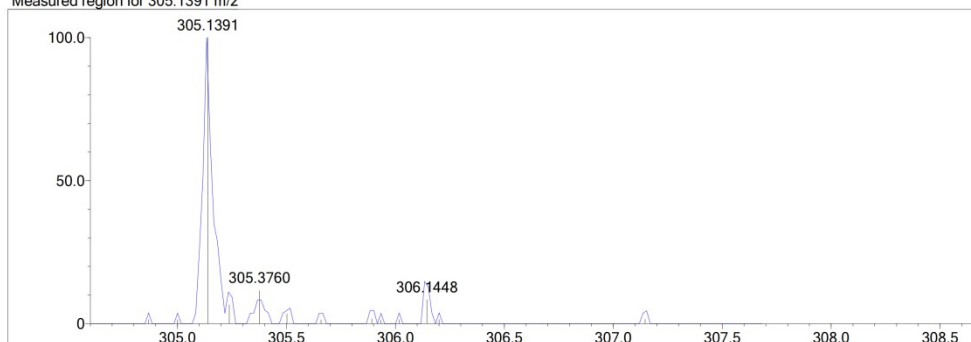

C17 H22 O5 [M-H]-: Predicted region for 305.1394 m/z

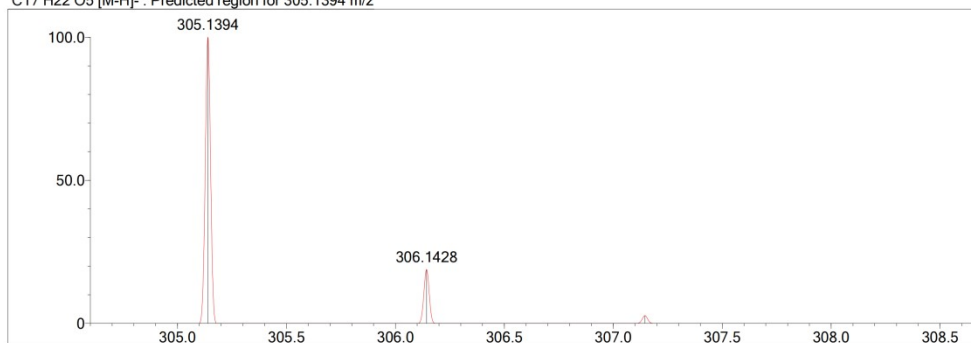

| Formula (M) | Ion    | Meas. m/z | Pred. m/z | Df. (mDa) | Df. (ppm) | DBE |
|-------------|--------|-----------|-----------|-----------|-----------|-----|
| C17 H22 O5  | [M-H]- | 305.1391  | 305.1394  | -0.3      | -0.98     | 7.0 |

**Figure S7.** HR-ESI-MS spectrum of magnolin A (1)

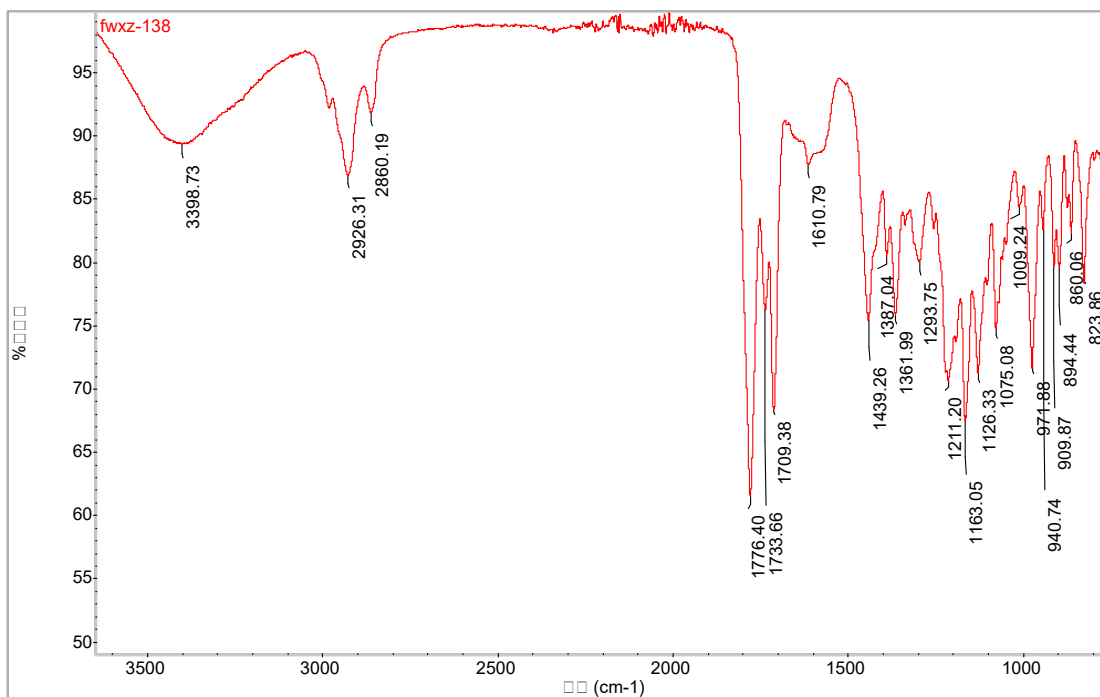

**Figure S8.** IR spectrum of magnolin A (1)

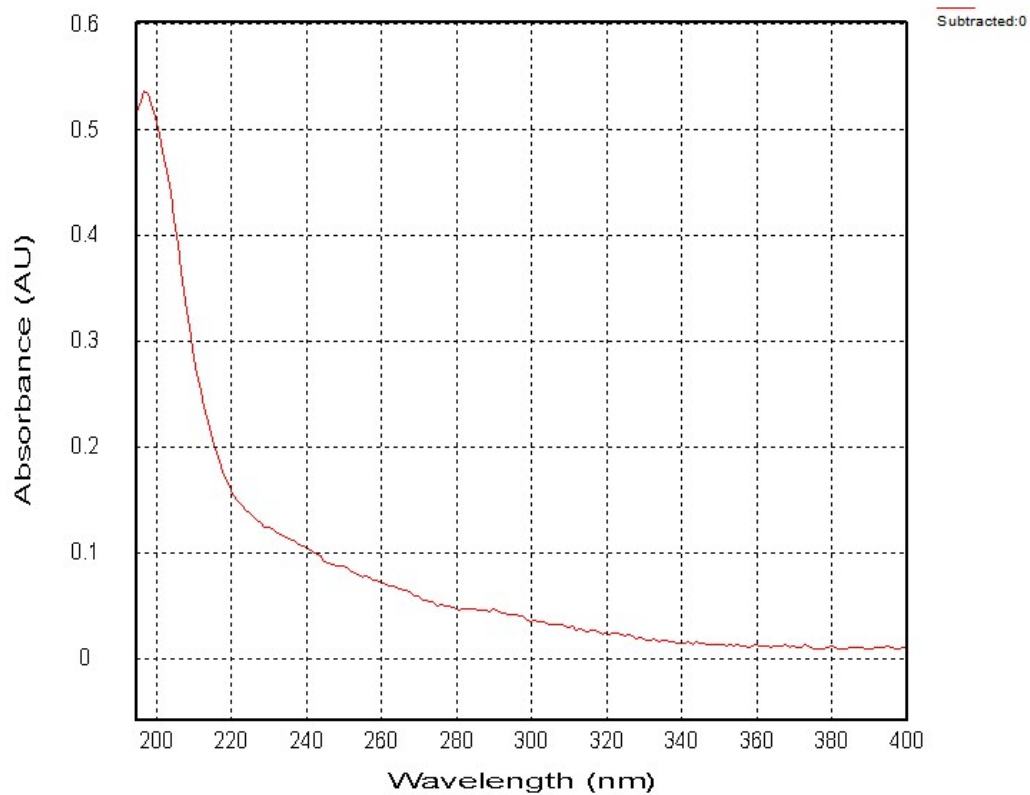

**Figure S9.** UV spectrum of magnolin A (1)

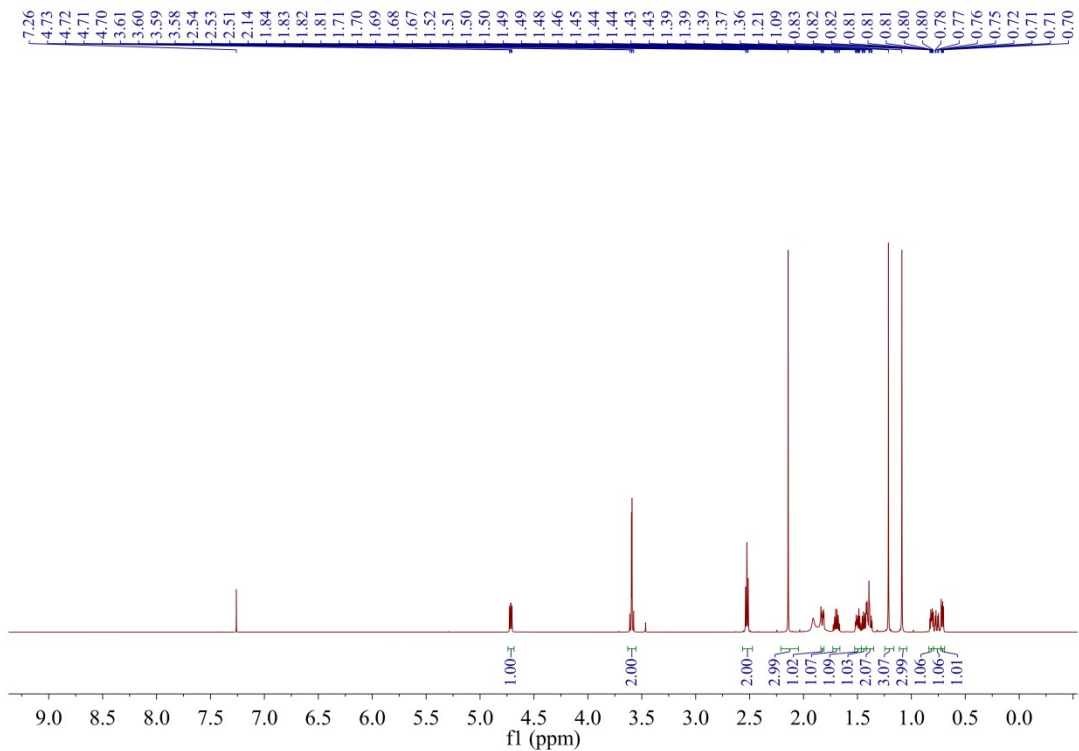

Figure S10.  $^1\text{H}$  NMR spectrum of magnolin B (**2**) in  $\text{CDCl}_3$

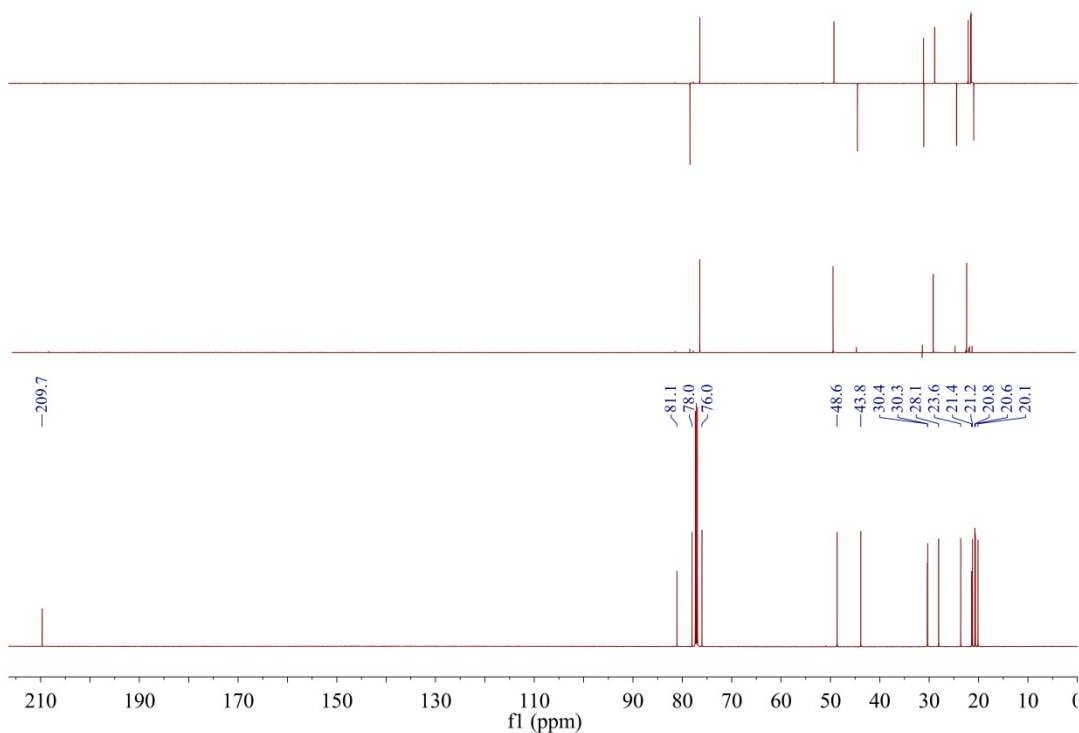

Figure S11.  $^{13}\text{C}$  NMR spectrum of magnolin B (**2**) in  $\text{CDCl}_3$

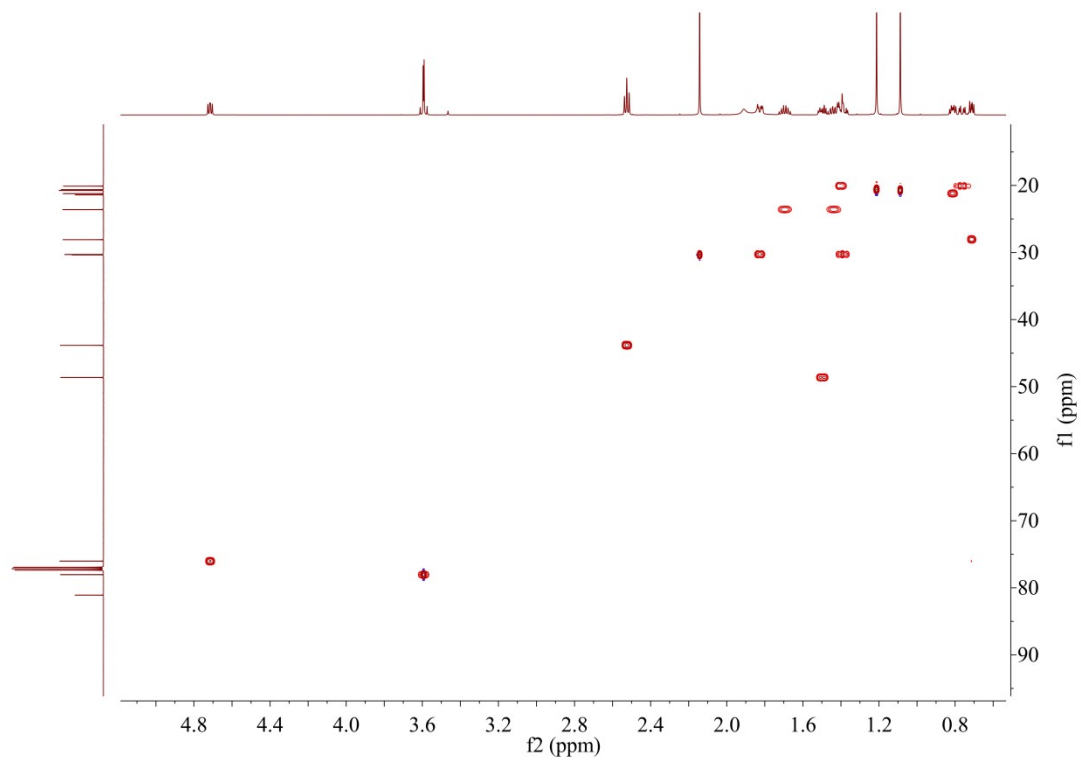

**Figure S12.** HSQC spectrum of magnolin B (**2**) in  $\text{CDCl}_3$

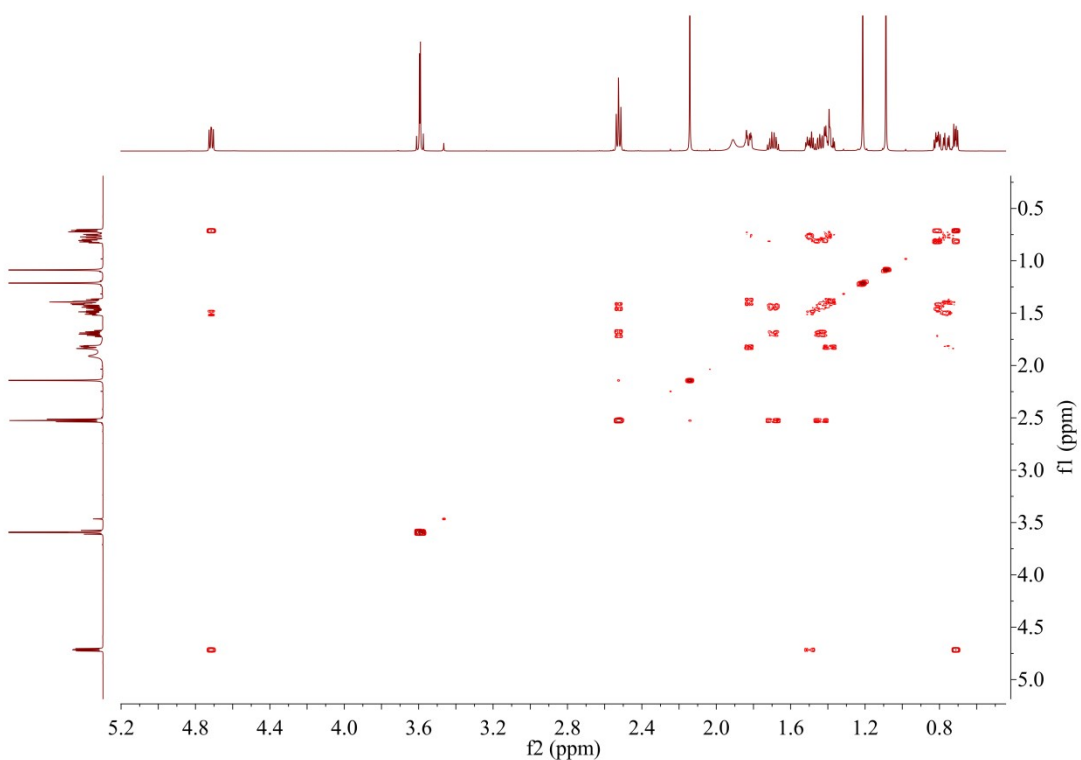

**Figure S13.** COSY spectrum of magnolin B (**2**) in  $\text{CDCl}_3$

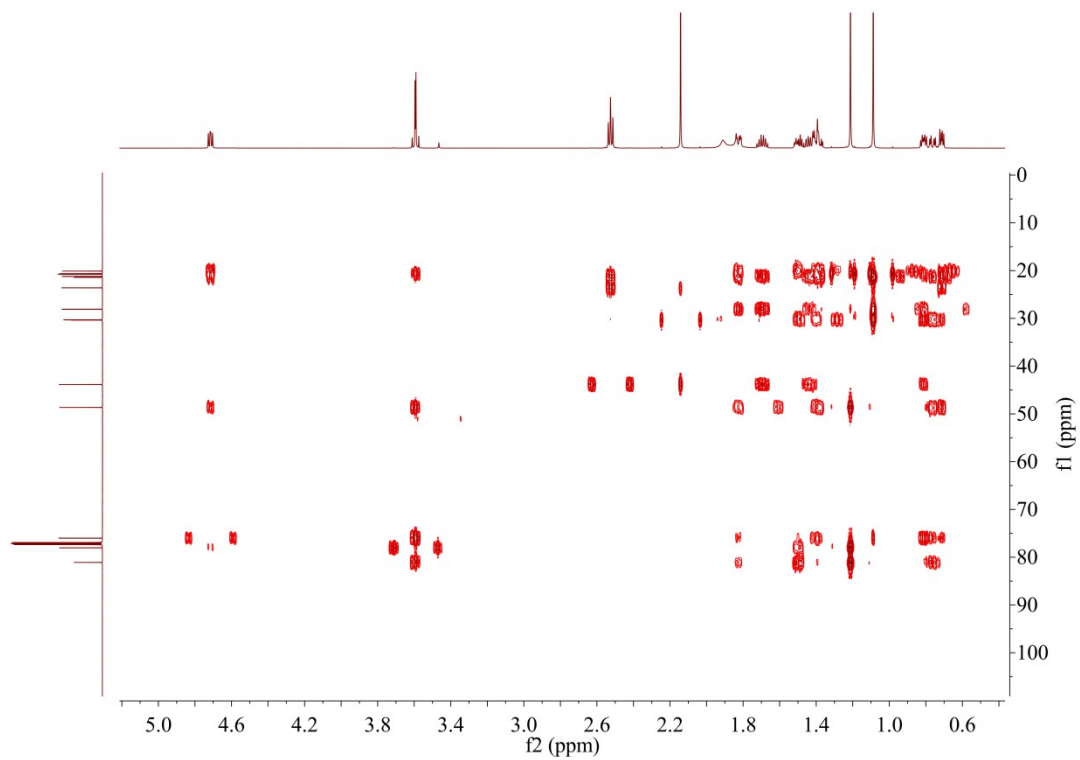

**Figure S14.** HMBC spectrum of magnolin B (2) in CDCl<sub>3</sub>

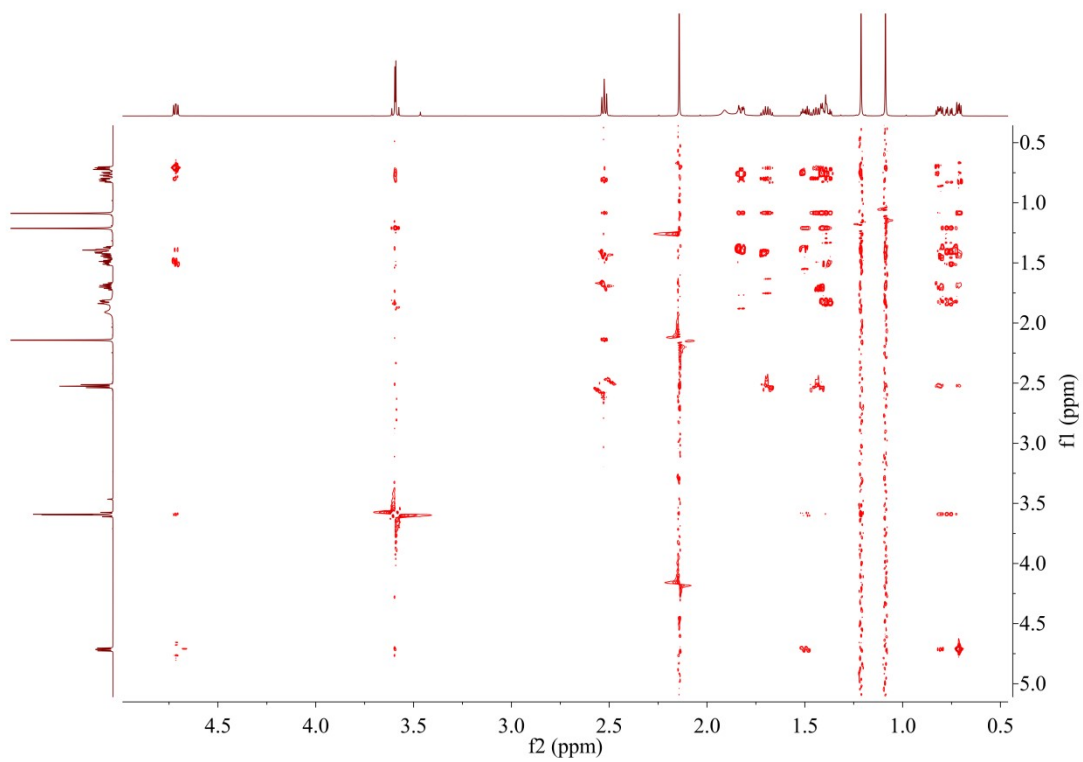

**Figure S15.** ROESY spectrum of magnolin B (2) in CDCl<sub>3</sub>

Data File: D:\DATA\2025\1104\fwxz-132.lcd

| Elmt | Val. | Min | Max | Elmt | Val. | Min | Max | Elmt | Val. | Min | Max | Use Adduct |
|------|------|-----|-----|------|------|-----|-----|------|------|-----|-----|------------|
| H    | 1    | 5   | 100 | N    | 3    | 0   | 10  | Si   | 4    | 0   | 0   | H          |
| B    | 3    | 0   | 0   | O    | 2    | 0   | 20  | S    | 2    | 0   | 0   | Na         |
| C    | 4    | 10  | 50  | F    | 1    | 0   | 0   | Cl   | 1    | 0   | 0   |            |

Error Margin (ppm): 5  
HC Ratio: unlimited  
Max Isotopes: all  
MSn Iso RI (%): 75.00

DBE Range: -2.0 - 1000.0  
Apply N Rule: no  
Isotope RI (%): 1.00  
MSn Logic Mode: AND

Electron Ions: both  
Use MSn Info: no  
Isotope Res: 10000  
Max Results: 50

Event#: 1 MS(E+) Ret. Time : 0.440 -&gt; 0.493 Scan#: 67 -&gt; 75

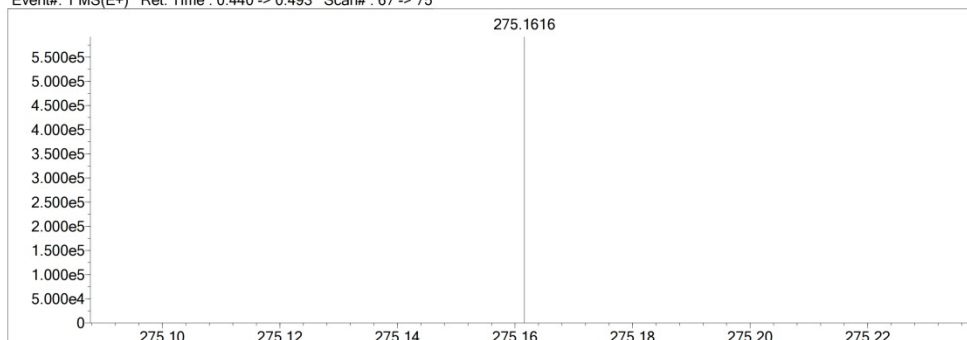

Measured region for 275.1616 m/z

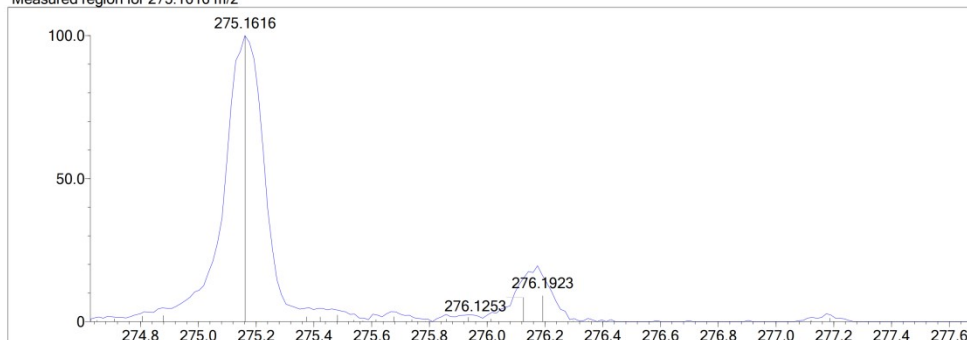C15 H24 O3 [M+Na]<sup>+</sup> : Predicted region for 275.1618 m/z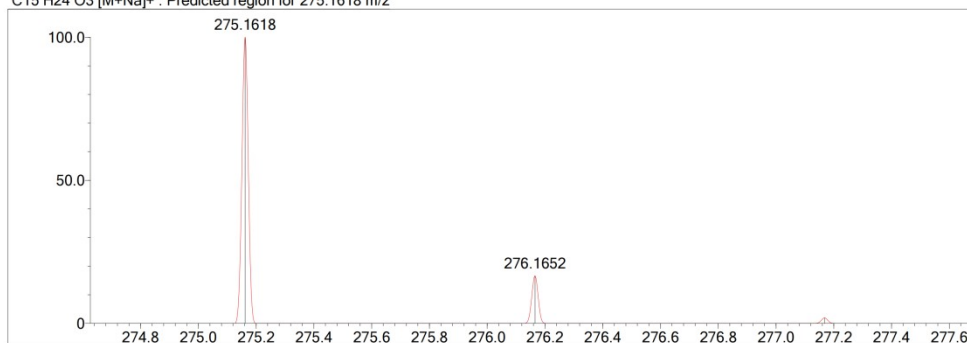

| Formula (M) | Ion                 | Meas. m/z | Pred. m/z | Df. (mDa) | Df. (ppm) | DBE |
|-------------|---------------------|-----------|-----------|-----------|-----------|-----|
| C15 H24 O3  | [M+Na] <sup>+</sup> | 275.1616  | 275.1618  | -0.2      | -0.73     | 4.0 |

**Figure S16.** HR-ESI-MS spectrum of magnolin B (2)

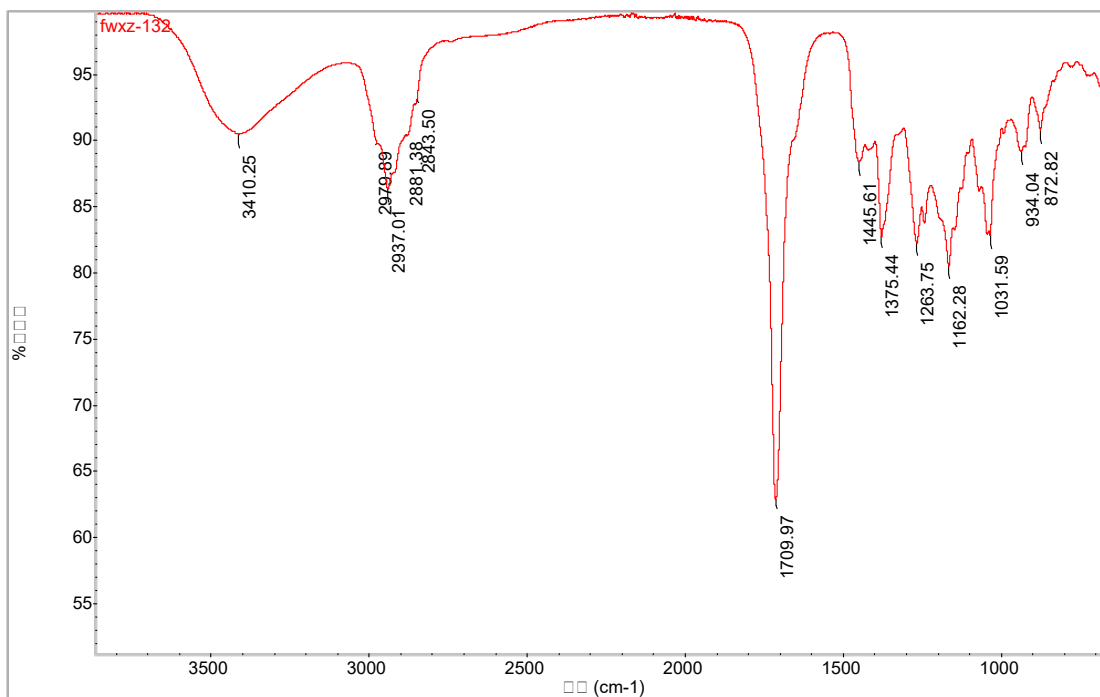

**Figure S17.** IR spectrum of magnolin B (2)

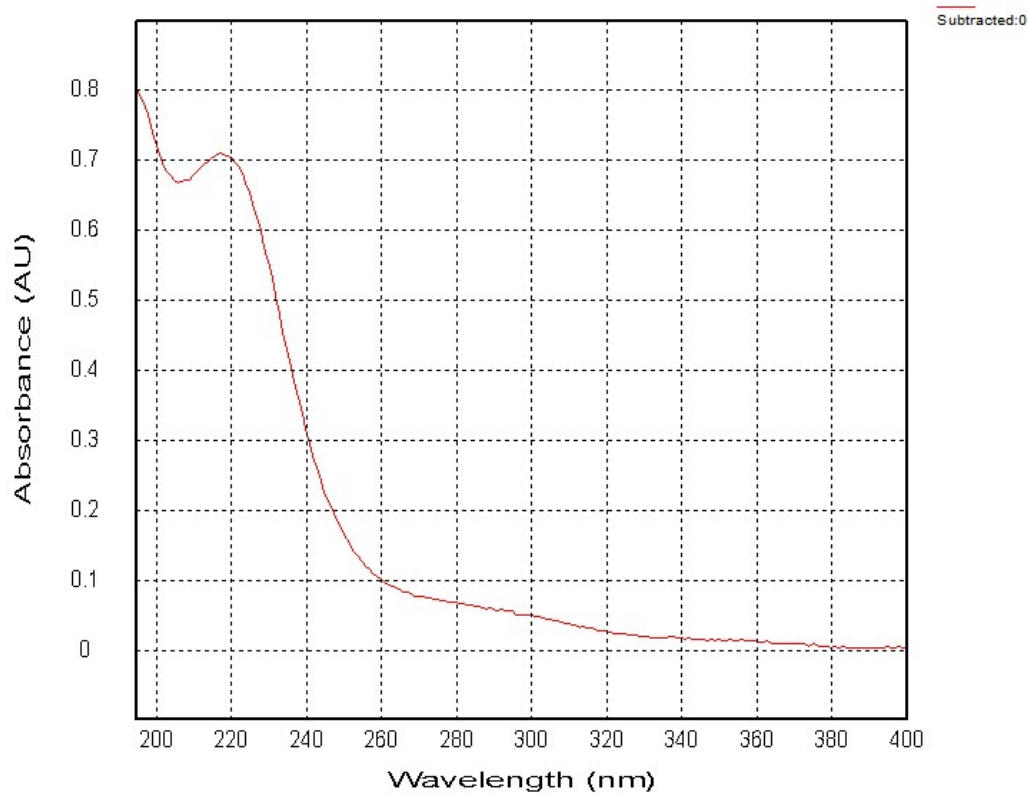

**Figure S18.** UV spectrum of magnolin B (2)

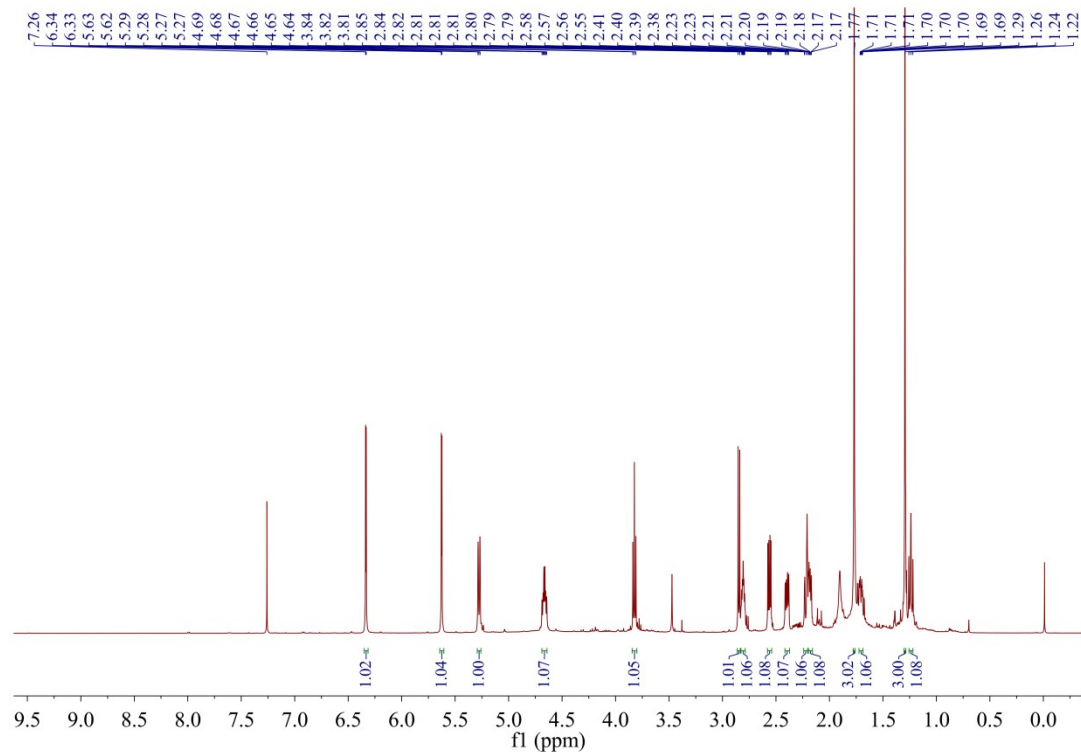

**Figure S19.**  $^1\text{H}$  NMR spectrum of magnolin C (**3**) in  $\text{CDCl}_3$

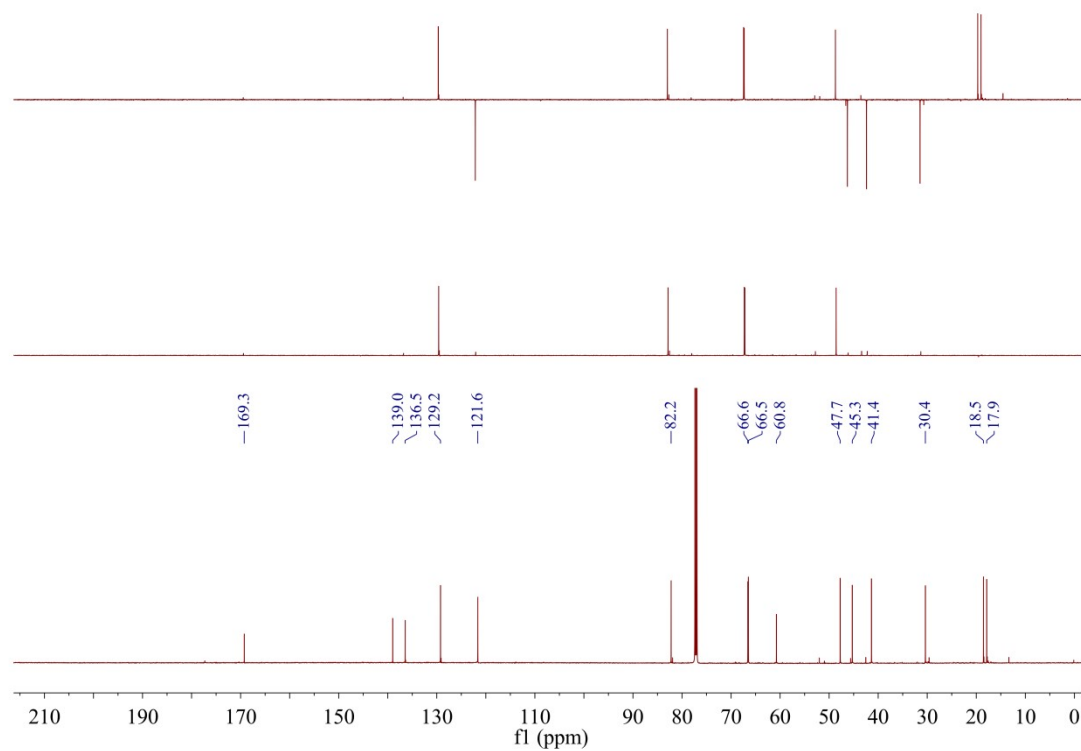

**Figure S20.**  $^{13}\text{C}$  NMR spectrum of magnolin C (**3**) in  $\text{CDCl}_3$

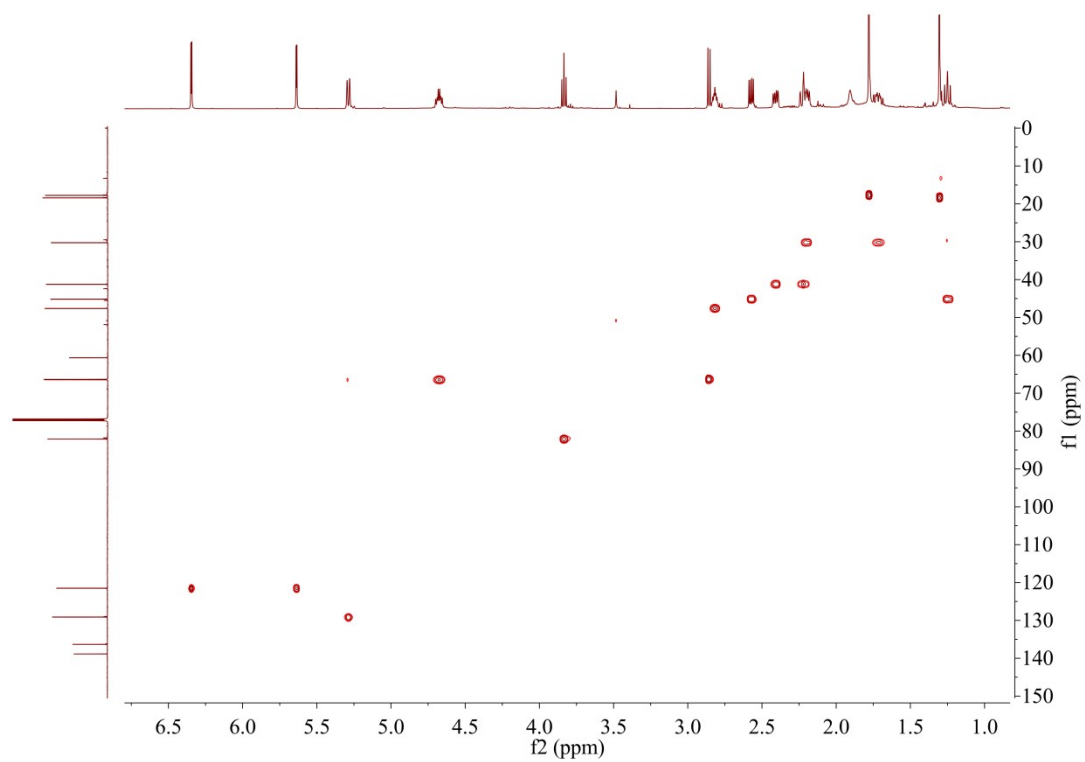

**Figure S21.** HSQC spectrum of magnolin C (**3**) in  $\text{CDCl}_3$

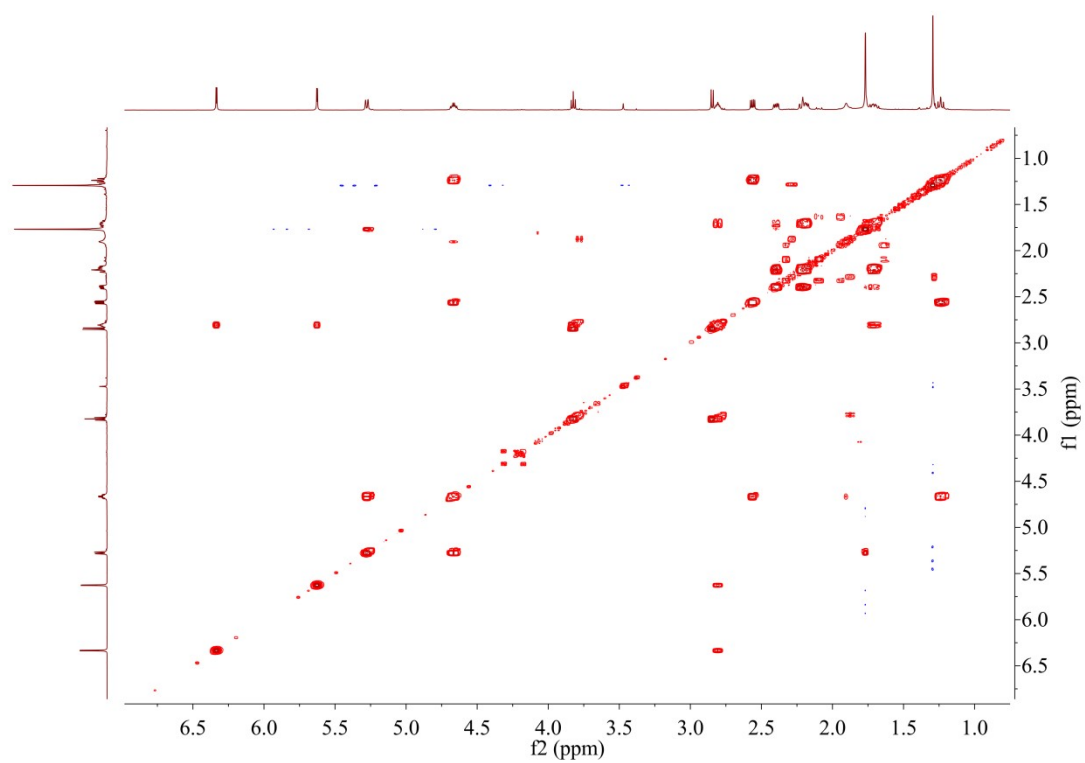

**Figure S22.** COSY spectrum of magnolin C (**3**) in  $\text{CDCl}_3$

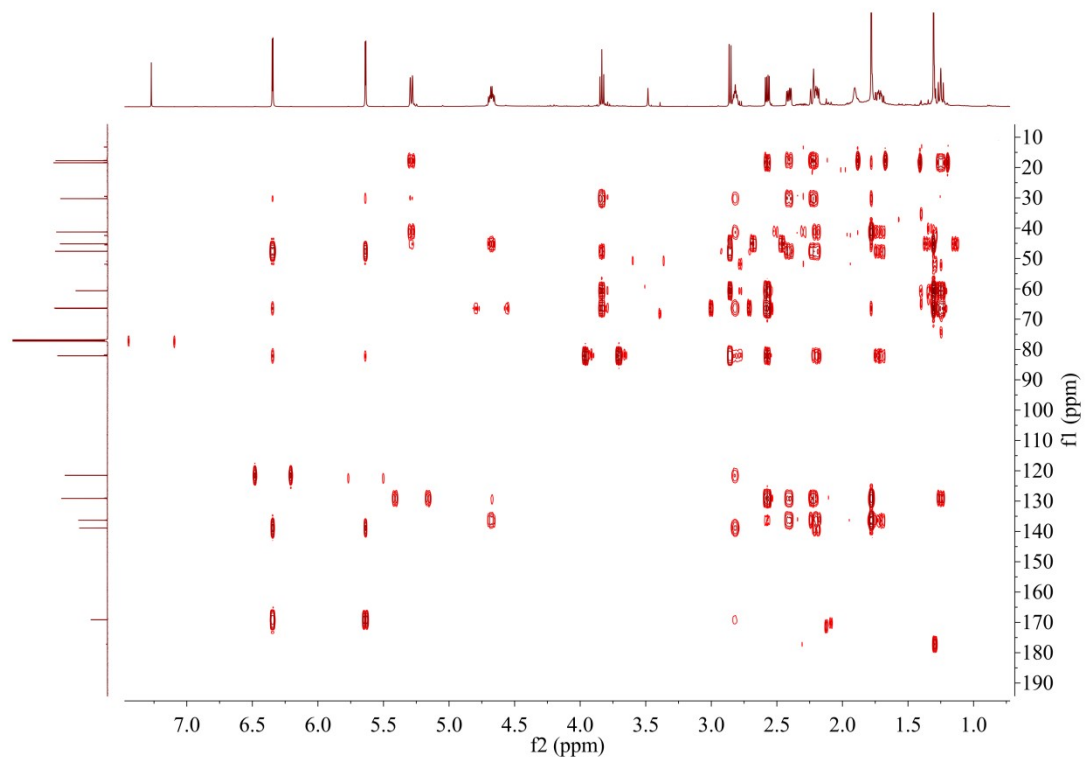

**Figure S23.** HMBC spectrum of magnolin C (**3**) in  $\text{CDCl}_3$

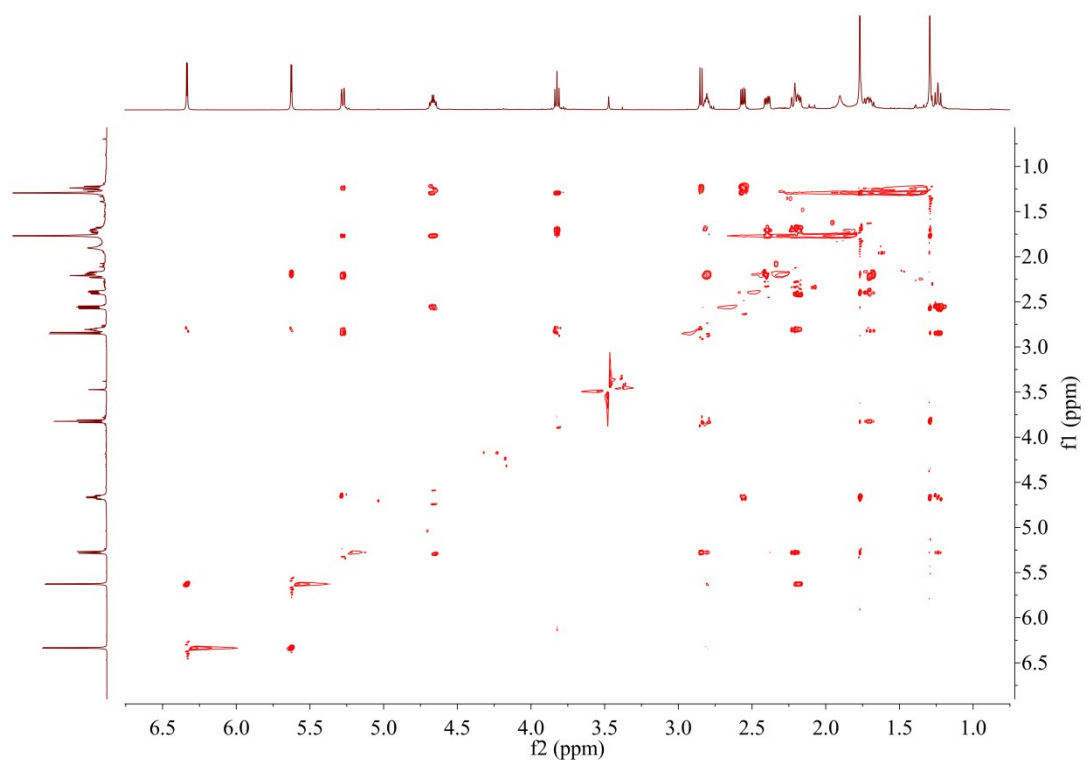

**Figure S24.** ROESY spectrum of magnolin C (**3**) in  $\text{CDCl}_3$

Data File: D:\DATA\2025\1104\fwzx-125.lcd

| Elmt | Val. | Min | Max | Elmt | Val. | Min | Max | Elmt | Val. | Min | Max | Use Adduct |
|------|------|-----|-----|------|------|-----|-----|------|------|-----|-----|------------|
| H    | 1    | 5   | 100 | N    | 3    | 0   | 10  | Si   | 4    | 0   | 0   | H          |
| B    | 3    | 0   | 0   | O    | 2    | 0   | 20  | S    | 2    | 0   | 0   | Na         |
| C    | 4    | 10  | 50  | F    | 1    | 0   | 0   | Cl   | 1    | 0   | 0   |            |

Error Margin (ppm): 5  
HC Ratio: unlimited  
Max Isotopes: all  
MSn Iso RI (%): 75.00

DBE Range: -2.0 - 1000.0  
Apply N Rule: no  
Isotope RI (%): 1.00  
MSn Logic Mode: AND

Electron Ions: both  
Use MSn Info: no  
Isotope Res: 10000  
Max Results: 50

Event#: 1 MS(E+) Ret. Time : 0.453 -&gt; 0.560 Scan#: 69 -&gt; 85

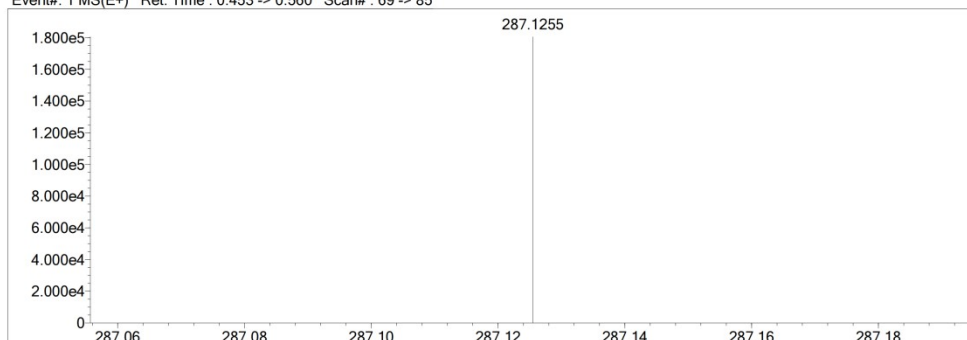

Measured region for 287.1255 m/z

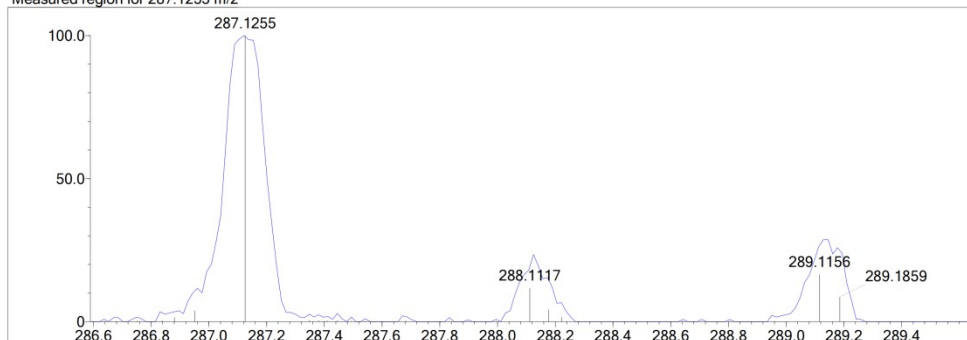C15 H20 O4 [M+Na]<sup>+</sup> : Predicted region for 287.1254 m/z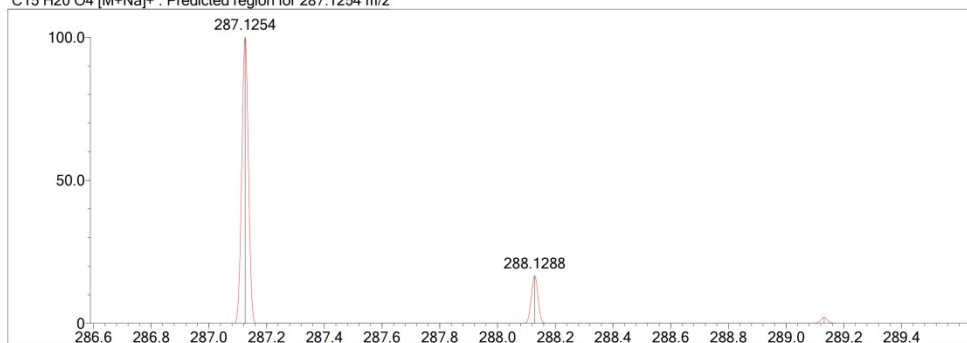

| Formula (M) | Ion                 | Meas. m/z | Pred. m/z | Df. (mDa) | Df. (ppm) | DBE |
|-------------|---------------------|-----------|-----------|-----------|-----------|-----|
| C15 H20 O4  | [M+Na] <sup>+</sup> | 287.1255  | 287.1254  | 0.1       | 0.35      | 6.0 |

**Figure S25. HR-ESI-MS spectrum of magnolin C (3)**

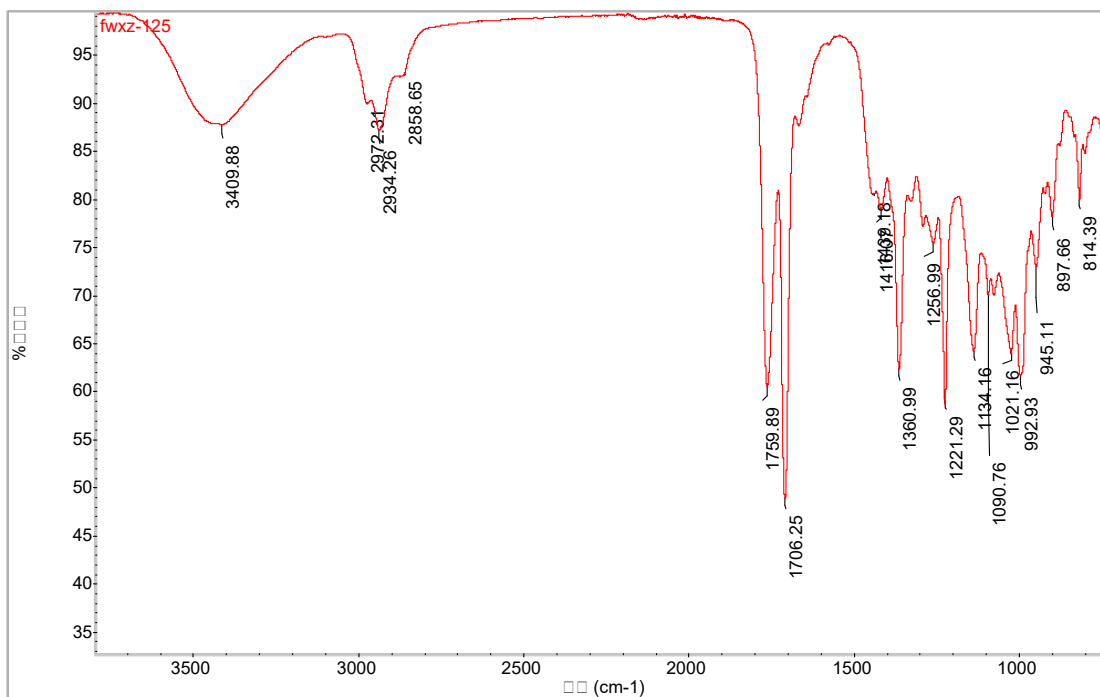

**Figure S26.** IR spectrum of magnolin C (3)

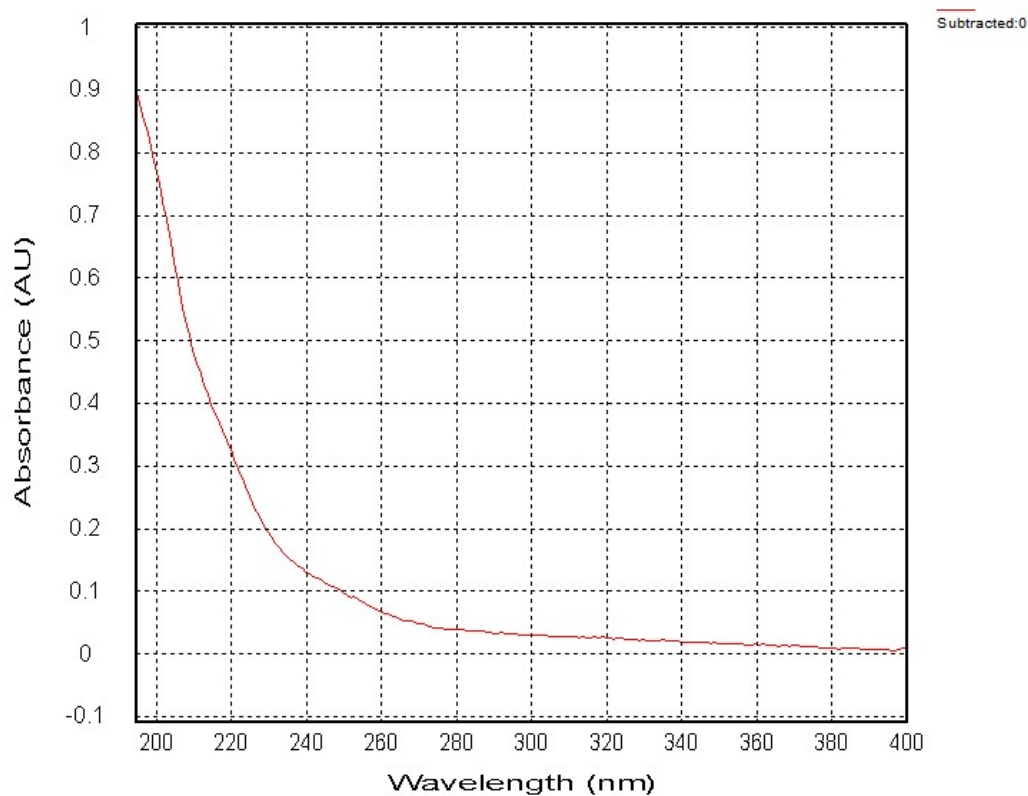

**Figure S27.** UV spectrum of magnolin C (3)

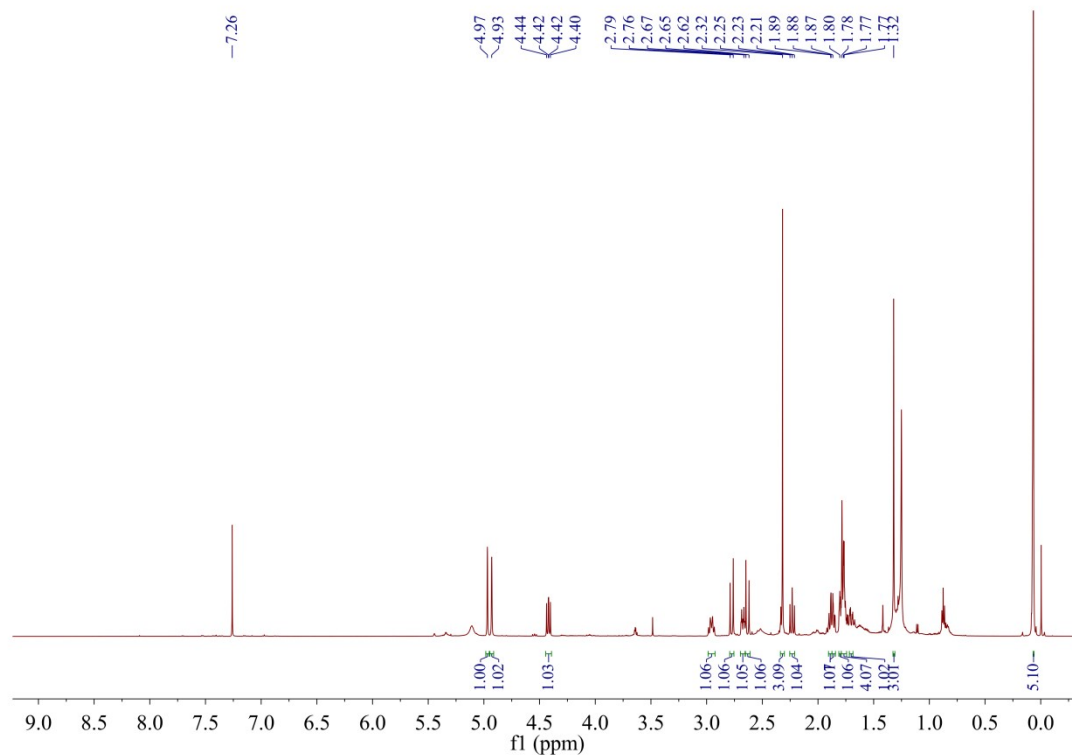

**Figure S28.**  $^1\text{H}$  NMR spectrum of magnolin D (**5**) in  $\text{CDCl}_3$

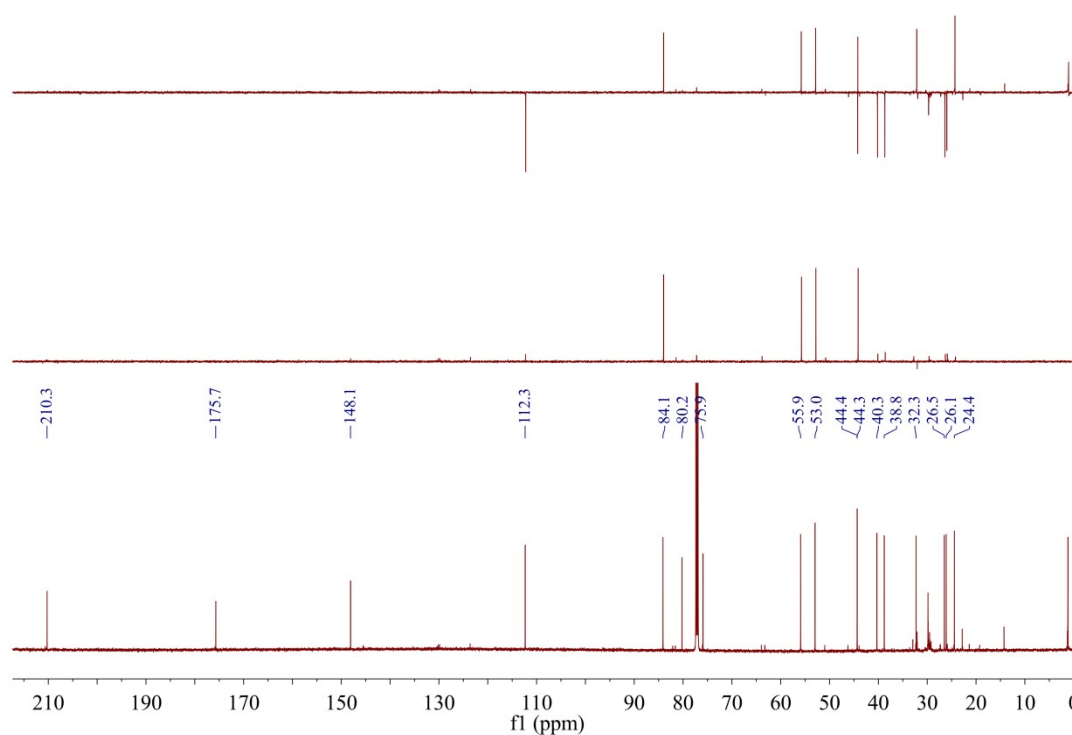

**Figure S29.**  $^{13}\text{C}$  NMR spectrum of magnolin D (**5**) in  $\text{CDCl}_3$

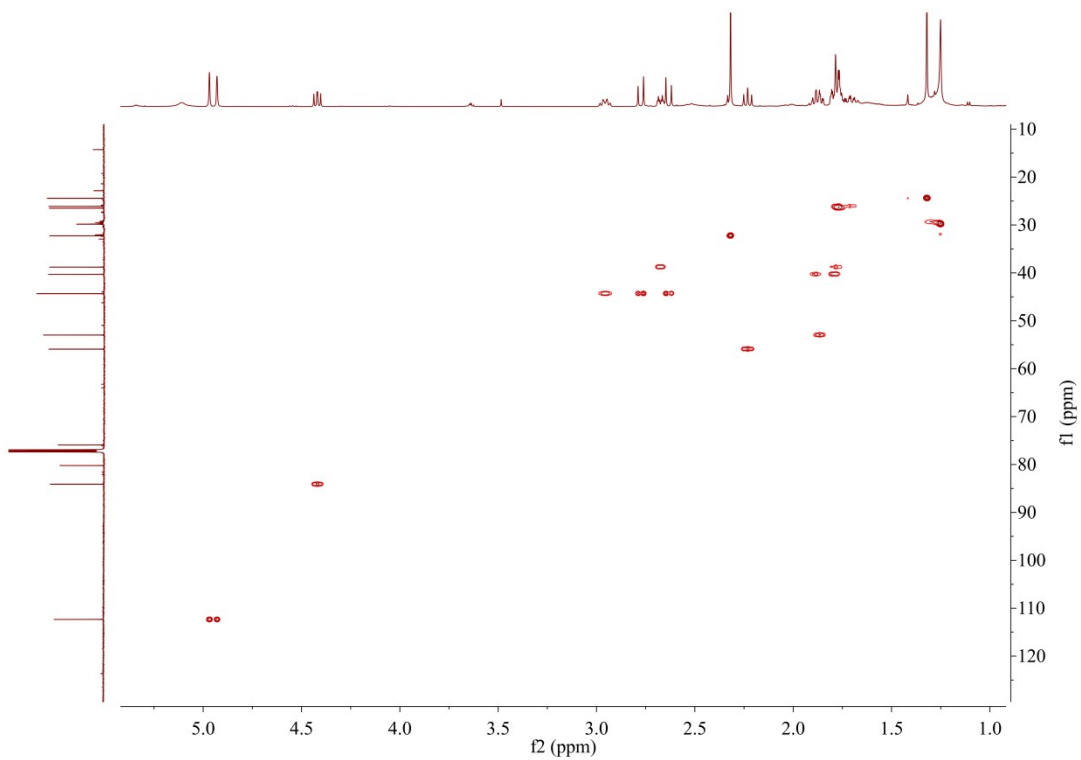

**Figure S30.** HSQC spectrum of magnolin D (**5**) in  $\text{CDCl}_3$

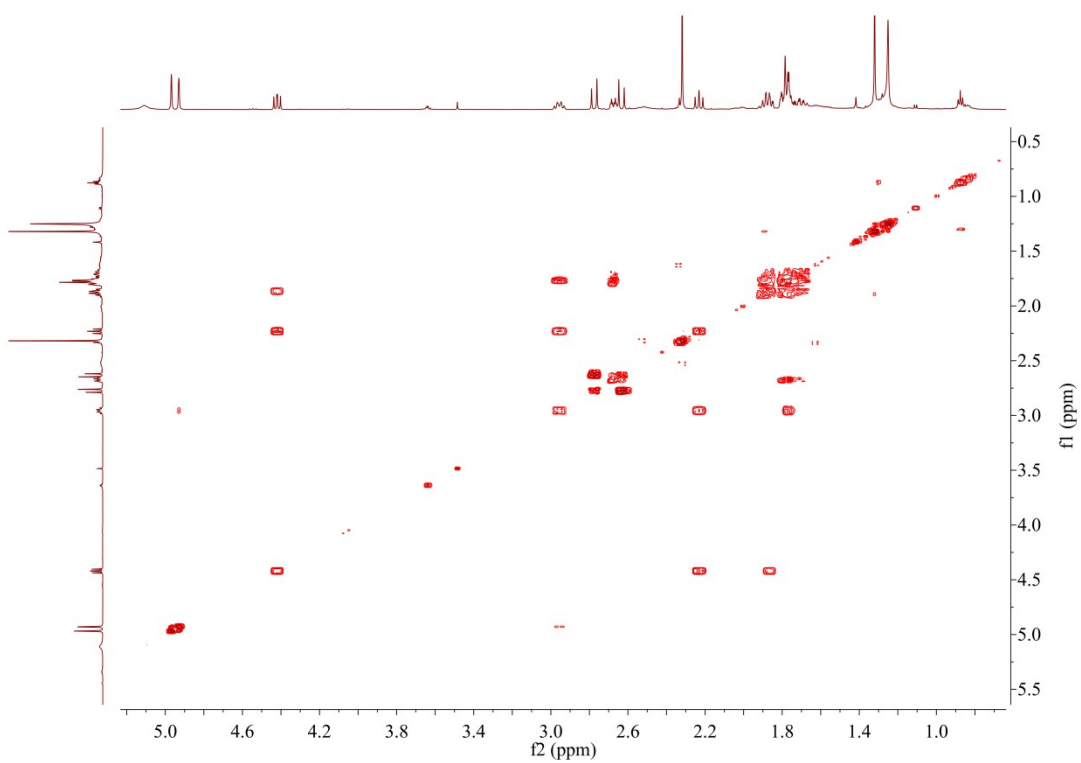

**Figure S31.** COSY spectrum of magnolin D (**5**) in  $\text{CDCl}_3$

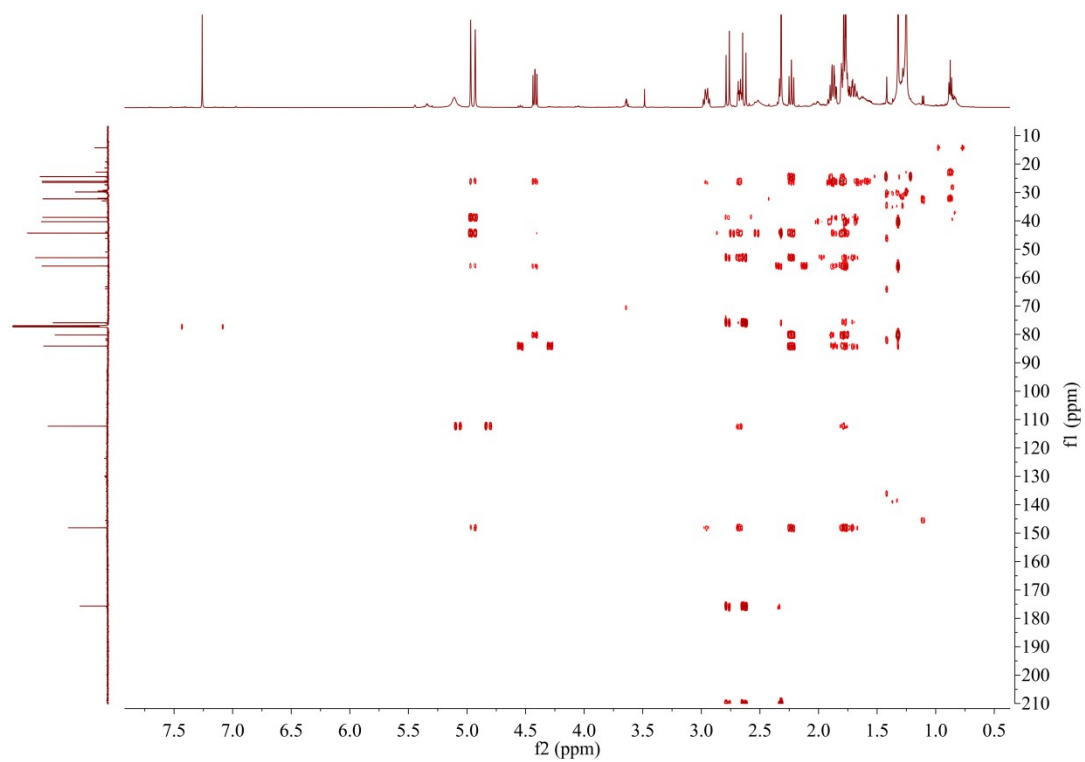

**Figure S32.** HMBC spectrum of magnolin D (**5**) in  $\text{CDCl}_3$

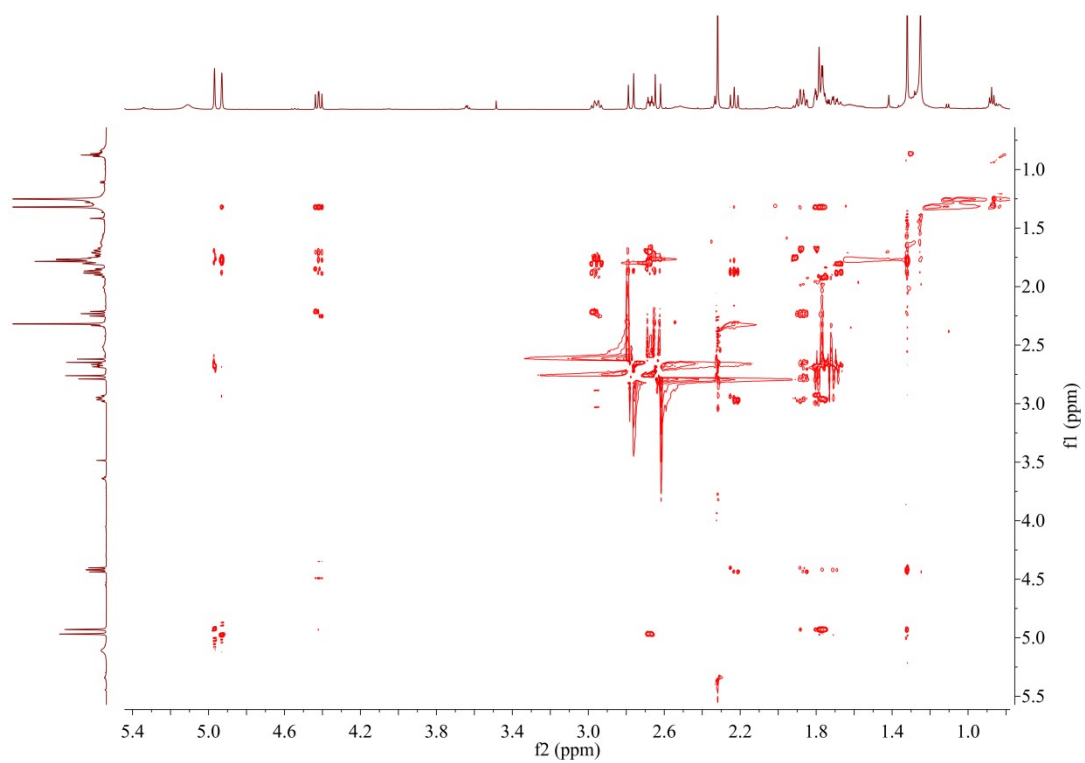

**Figure S33.** ROESY spectrum of magnolin D (**5**) in  $\text{CDCl}_3$

Data File: D:\DATA\2025\0821\fwxz-112.lcd

| Elmt | Val. | Min | Max | Elmt | Val. | Min | Max | Elmt | Val. | Min | Max | Use Adduct |
|------|------|-----|-----|------|------|-----|-----|------|------|-----|-----|------------|
| H    | 1    | 5   | 100 | O    | 2    | 0   | 20  | S    | 2    | 0   | 5   | H          |
| C    | 4    | 5   | 50  | F    | 1    | 0   | 0   | Cl   | 1    | 0   | 0   | Na         |
| N    | 3    | 0   | 10  | Si   | 4    | 0   | 0   | Br   | 1    | 0   | 0   |            |

Error Margin (ppm): 5  
 HC Ratio: unlimited  
 Max Isotopes: all  
 MSn Iso RI (%): 75.00

DBE Range: -2.0 - 1000.0  
 Apply N Rule: no  
 Isotope RI (%): 1.00  
 MSn Logic Mode: AND

Electron Ions: both  
 Use MSn Info: no  
 Isotope Res: 10000  
 Max Results: 50

Event#: 1 MS(E+) Ret. Time : 0.520 -> 1.000 Scan#: 79 -> 151

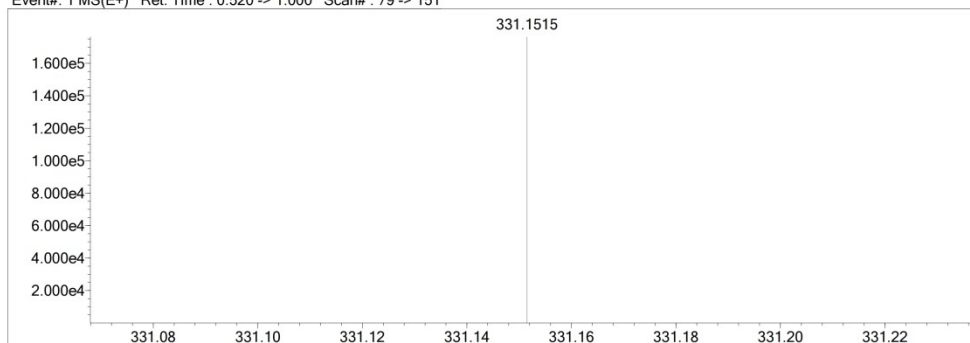

Measured region for 331.1515 m/z

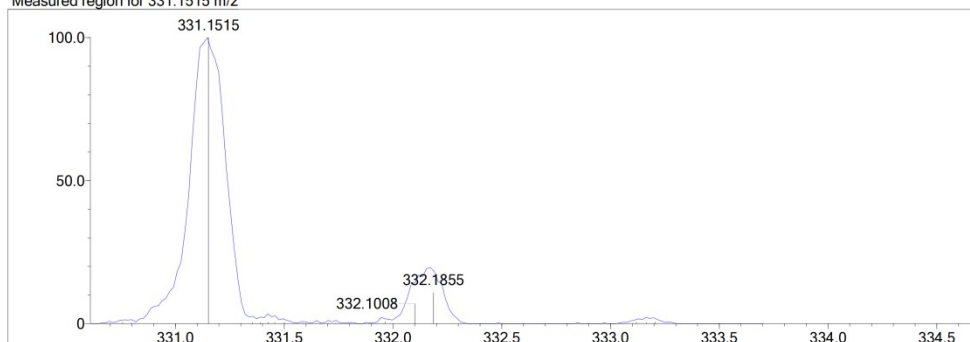

C17 H24 O5 [M+Na]+ : Predicted region for 331.1516 m/z

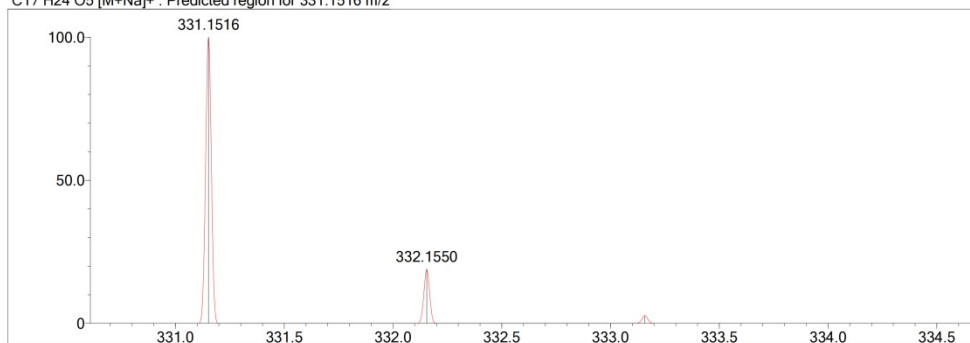

| Formula (M) | Ion     | Meas. m/z | Pred. m/z | Df. (mDa) | Df. (ppm) | DBE |
|-------------|---------|-----------|-----------|-----------|-----------|-----|
| C17 H24 O5  | [M+Na]+ | 331.1515  | 331.1516  | -0.1      | -0.30     | 6.0 |

**Figure S34.** HR-ESI-MS spectrum of magnolin D (5)

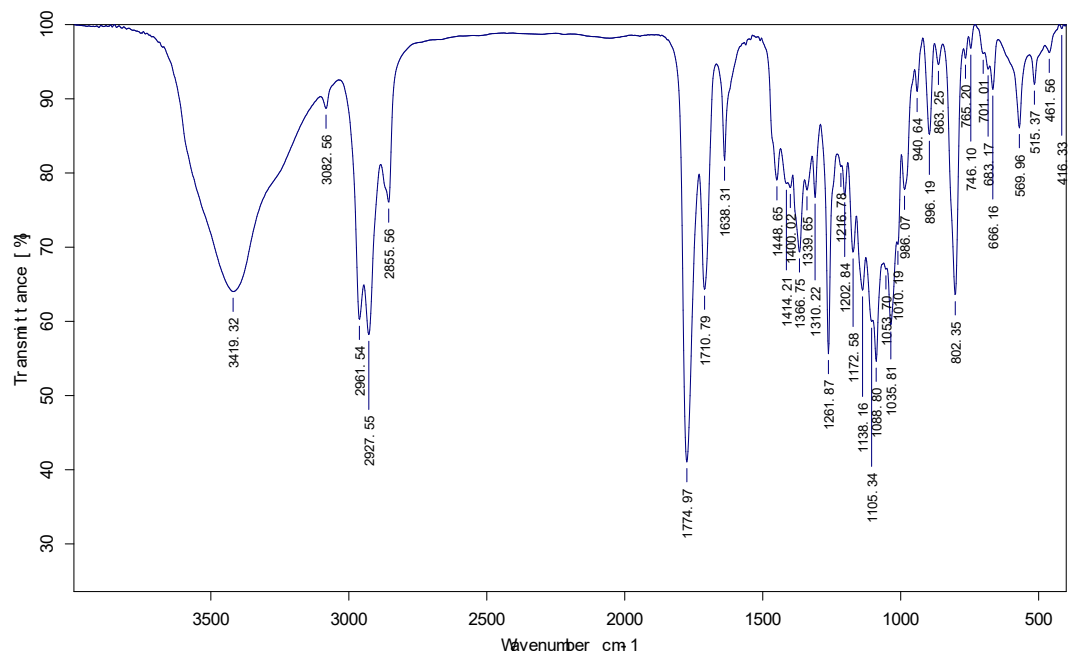

Figure S35. IR spectrum of magnolin D (5)

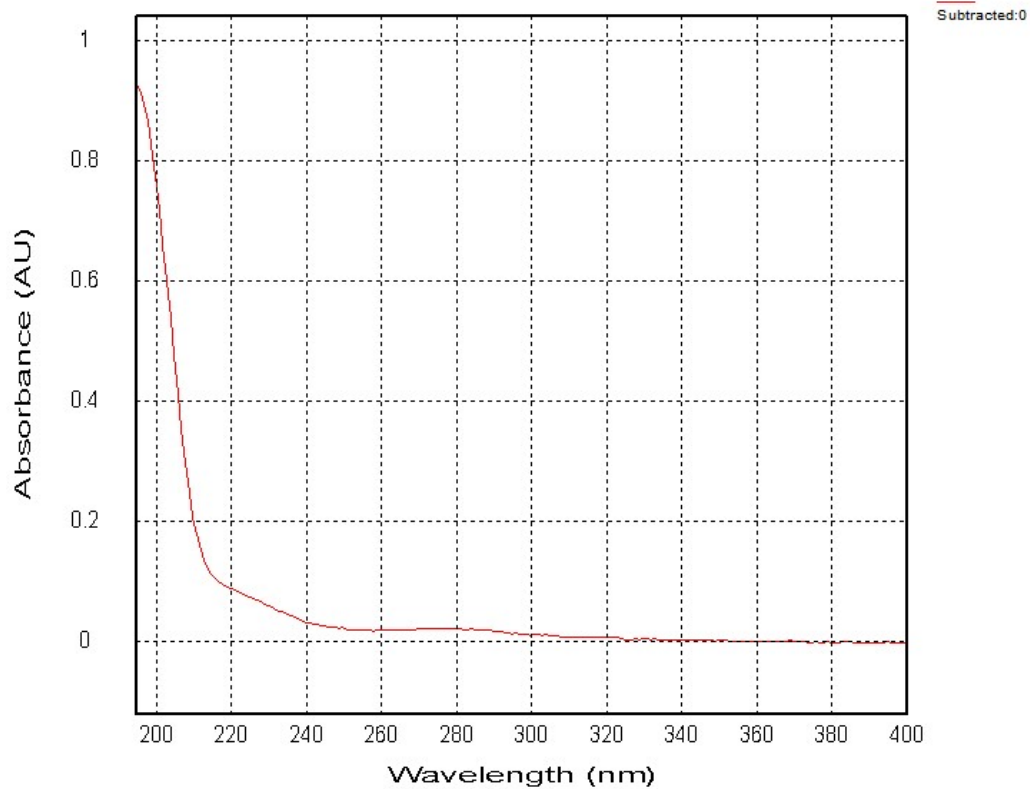

Figure S36. UV spectrum of magnolin D (5)

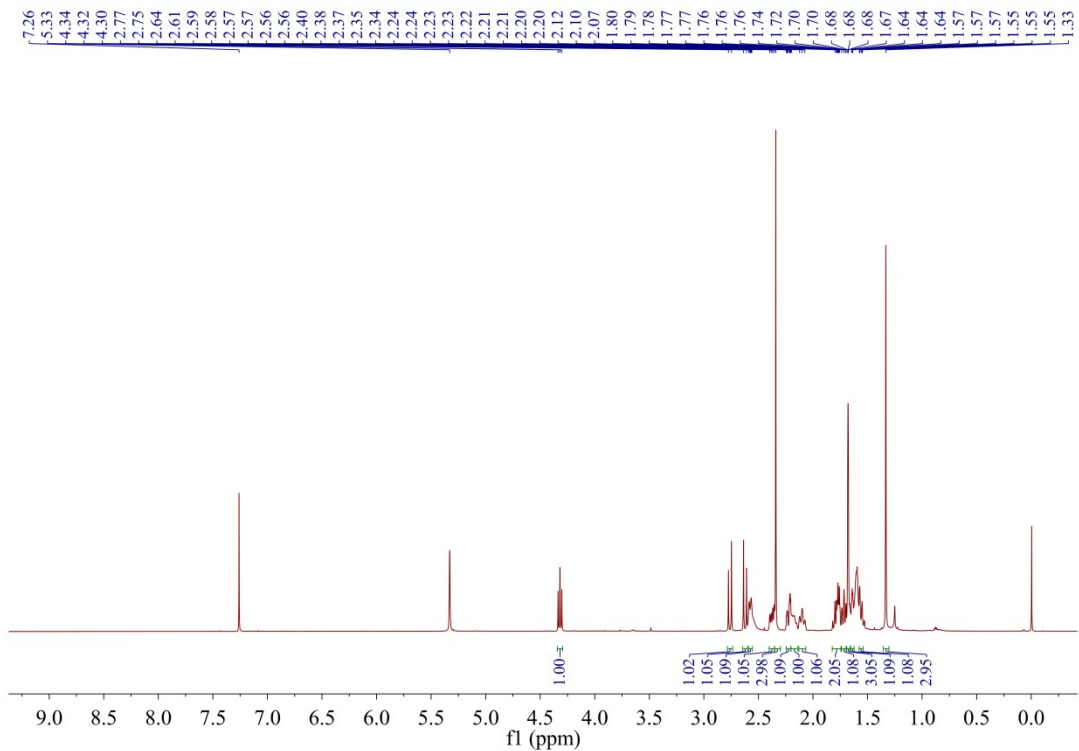

**Figure S37.**  $^1\text{H}$  NMR spectrum of magnolin E (**6**) in  $\text{CDCl}_3$

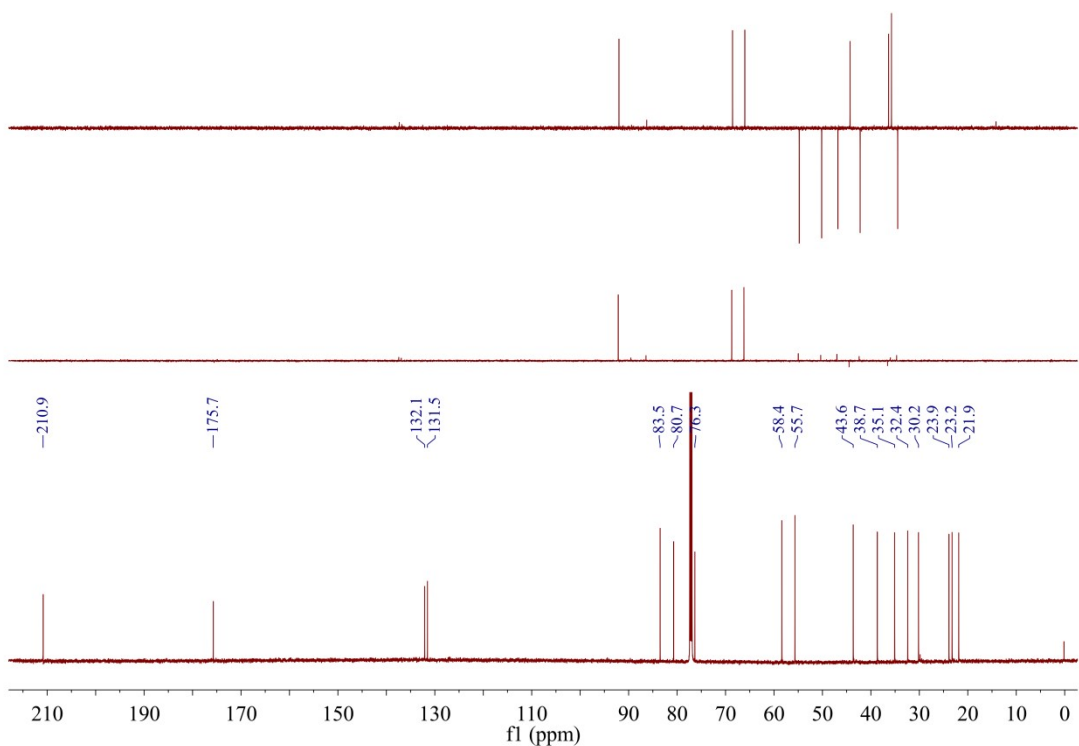

**Figure S38.**  $^{13}\text{C}$  NMR spectrum of magnolin E (**6**) in  $\text{CDCl}_3$

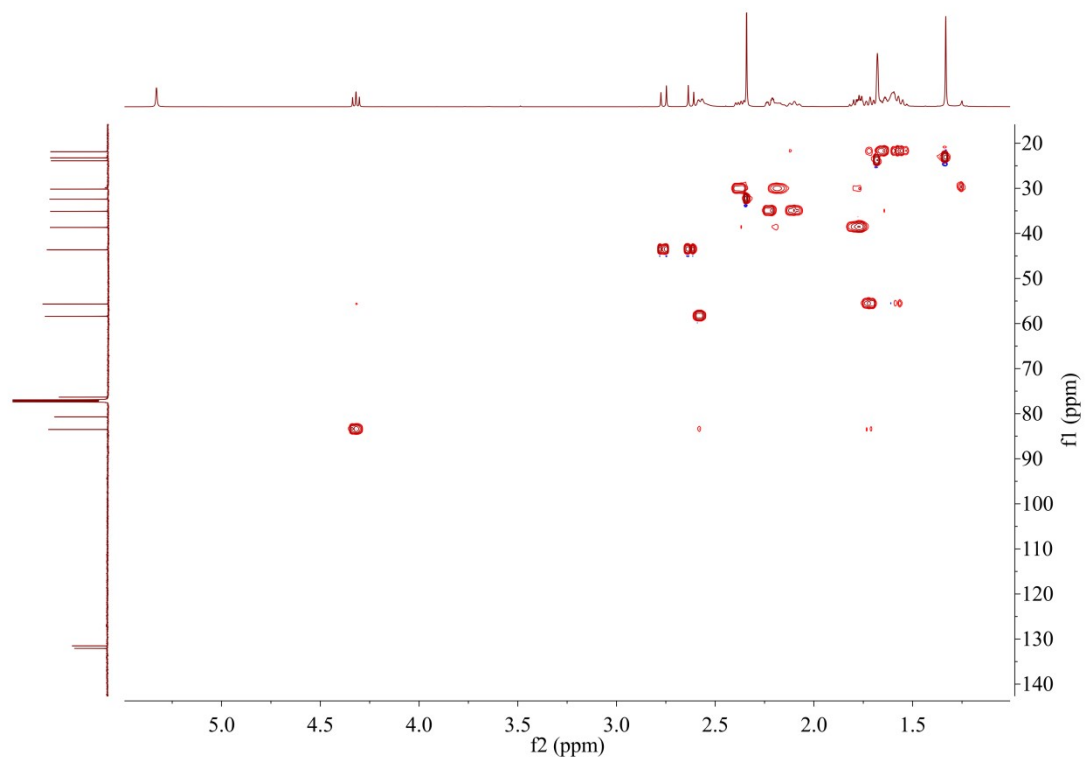

**Figure S39.** HSQC spectrum of magnolin E (**6**) in CDCl<sub>3</sub>

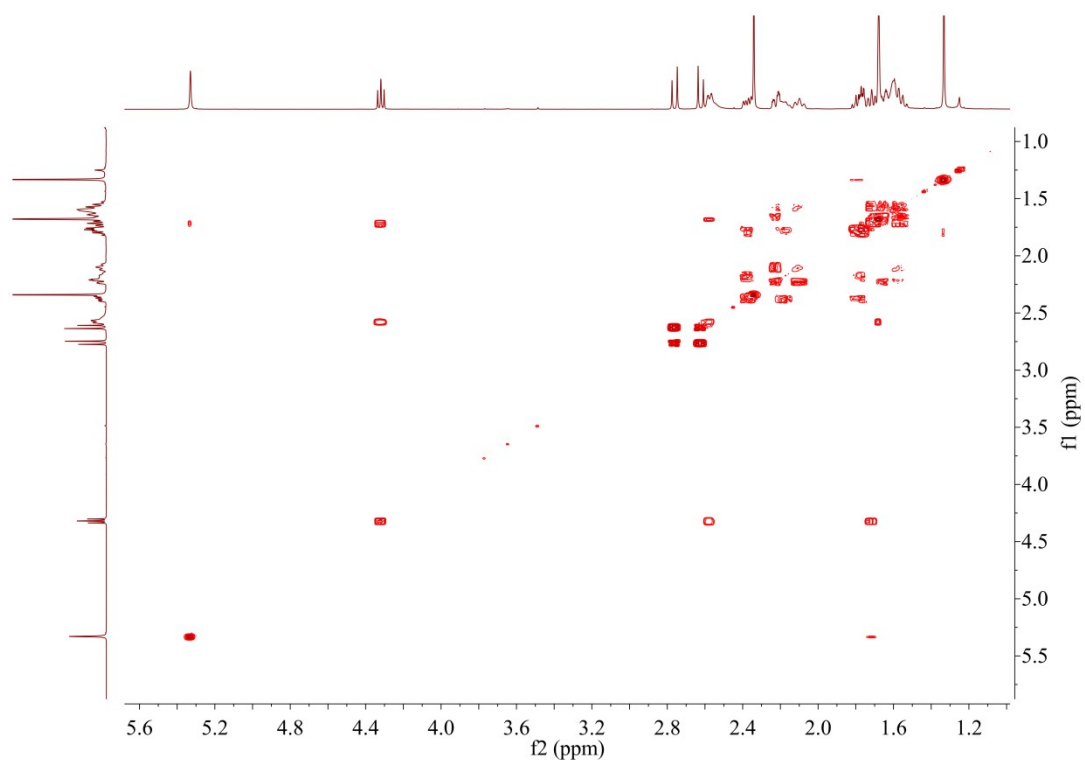

**Figure S40.** COSY spectrum of magnolin E (**6**) in CDCl<sub>3</sub>

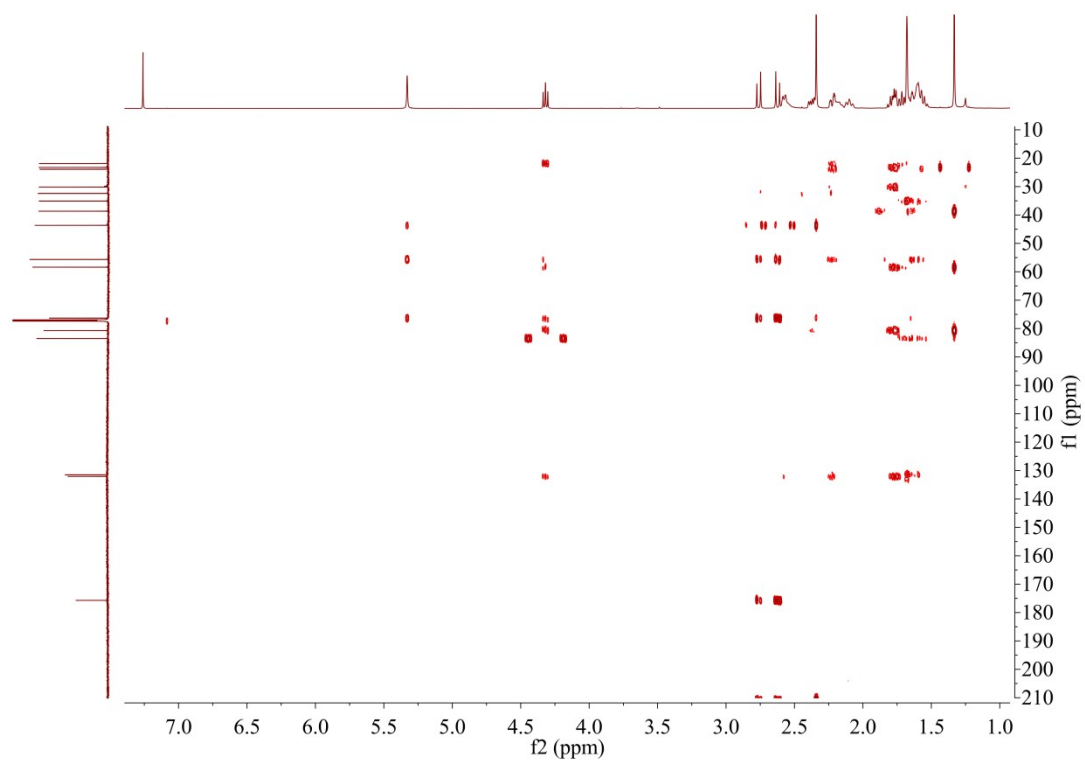

**Figure S41.** HMBC spectrum of magnolin E (**6**) in  $\text{CDCl}_3$

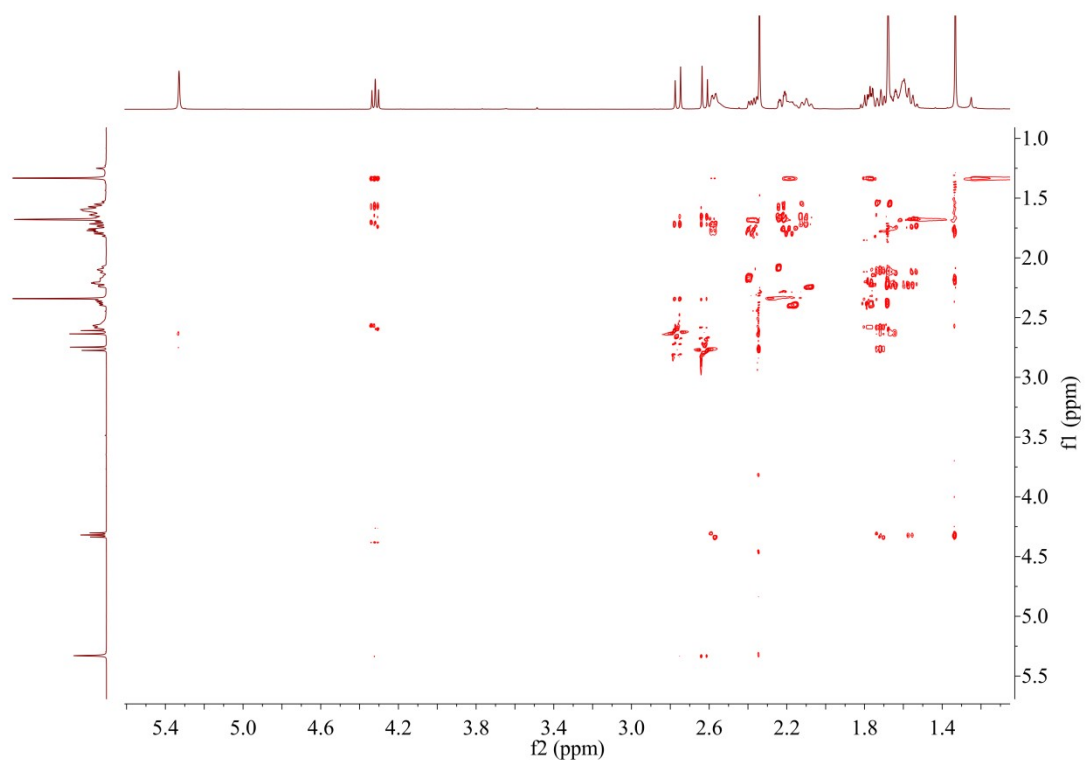

**Figure S42.** ROESY spectrum of magnolin E (**6**) in  $\text{CDCl}_3$

Data File: D:\DATA\2025\0821\fwz-110.lcd

| Elmt | Val. | Min | Max | Elmt | Val. | Min | Max | Elmt | Val. | Min | Max | Use Adduct |
|------|------|-----|-----|------|------|-----|-----|------|------|-----|-----|------------|
| H    | 1    | 5   | 100 | O    | 2    | 0   | 20  | S    | 2    | 0   | 5   | H          |
| C    | 4    | 5   | 50  | F    | 1    | 0   | 0   | Cl   | 1    | 0   | 0   | Na         |
| N    | 3    | 0   | 10  | Si   | 4    | 0   | 0   | Br   | 1    | 0   | 0   |            |

Error Margin (ppm): 5  
 DBE Range: -2.0 - 1000.0  
 Electron Ions: both  
 HC Ratio: unlimited  
 Apply N Rule: no  
 Use MSn Info: no  
 Max Isotopes: all  
 Isotope RI (%): 1.00  
 MSn Iso RI (%): 75.00  
 MSn Logic Mode: AND  
 Isotope Res: 10000  
 Max Results: 50

Event#: 1 MS(E+) Ret. Time : 0.520 -> 0.680 Scan#: 79 -> 103

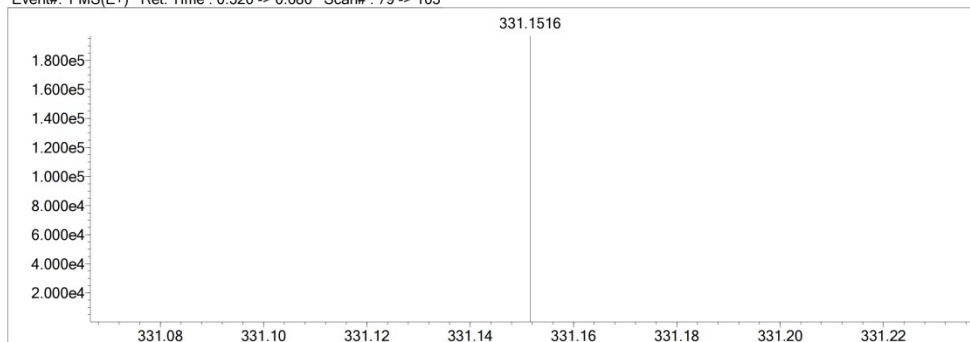

Measured region for 331.1516 m/z

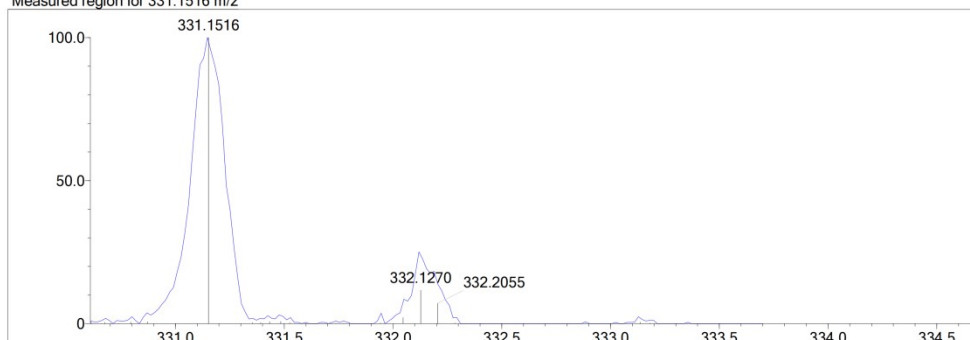

C17 H24 O5 [M+Na]+ : Predicted region for 331.1516 m/z

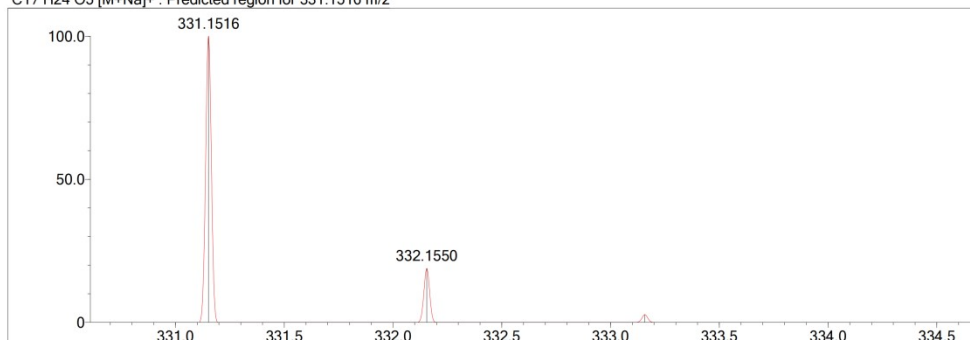

| Formula (M) | Ion     | Meas. m/z | Pred. m/z | Df. (mDa) | Df. (ppm) | DBE |
|-------------|---------|-----------|-----------|-----------|-----------|-----|
| C17 H24 O5  | [M+Na]+ | 331.1516  | 331.1516  | 0.0       | 0.00      | 6.0 |

**Figure S43.** HR-ESI-MS spectrum of magnolin E (6)

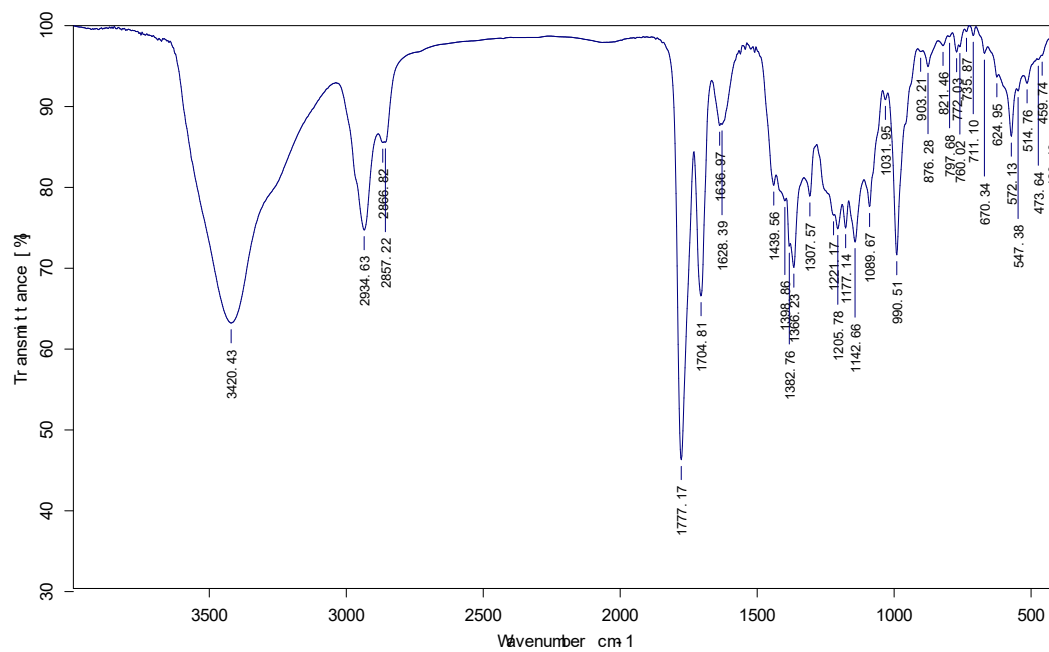

**Figure S44.** IR spectrum of magnolin E (6)

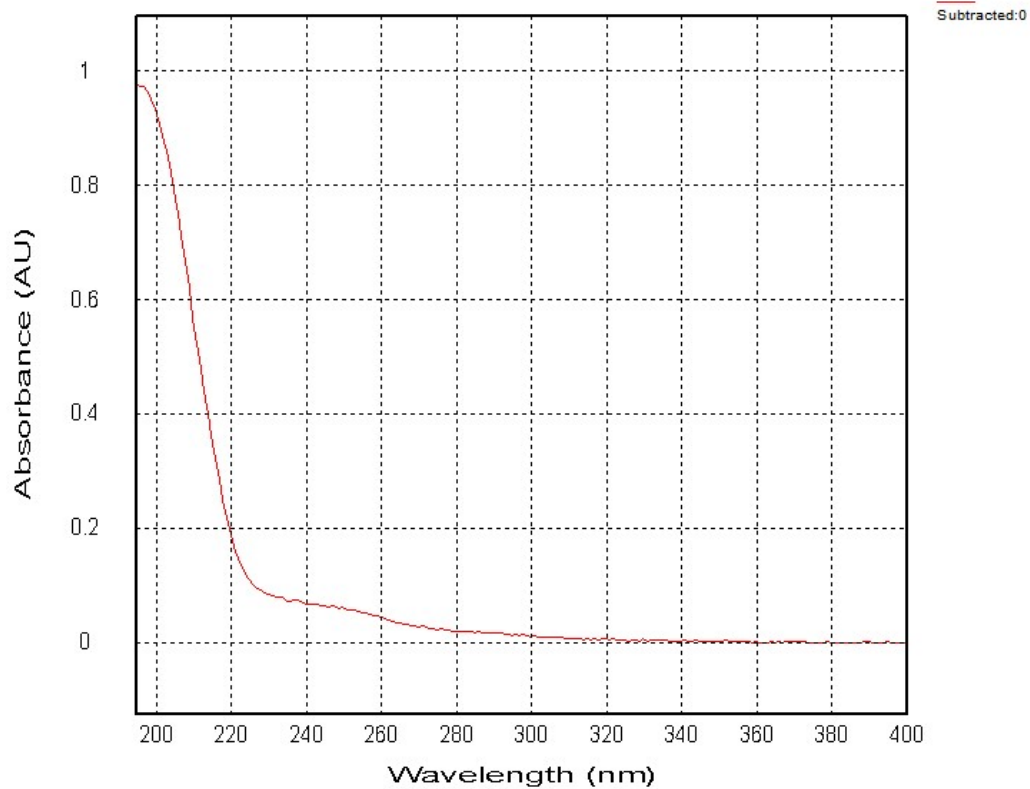

**Figure S45.** UV spectrum of magnolin E (6)

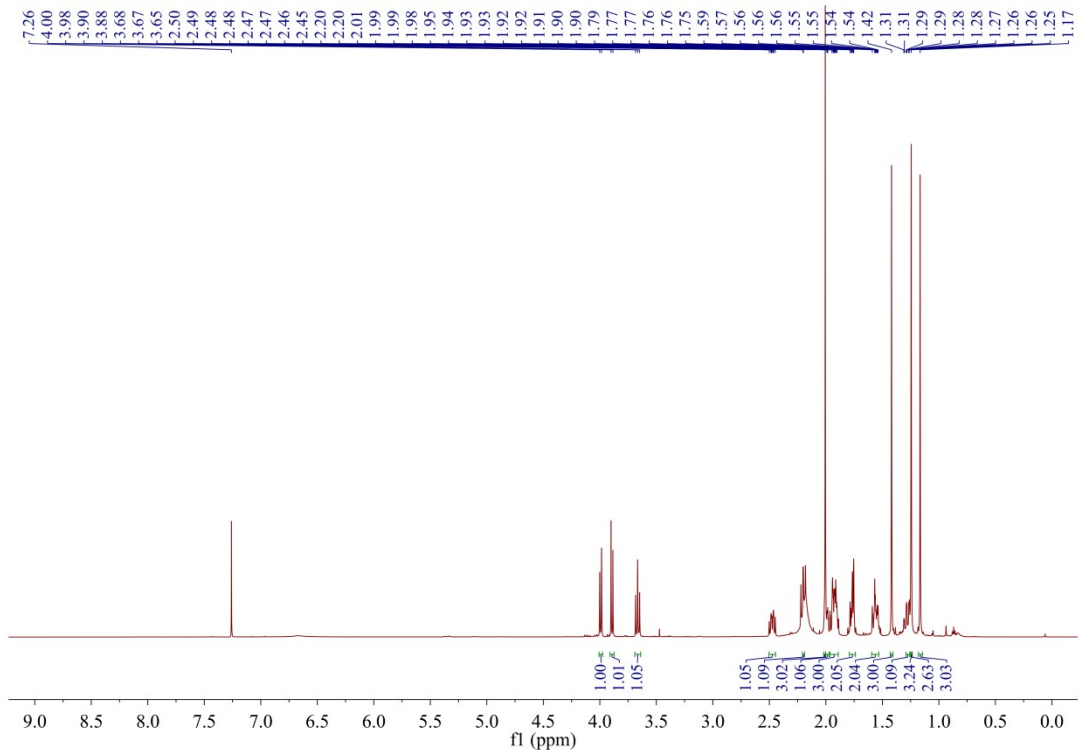

Figure S46.  $^1\text{H}$  NMR spectrum of magnorlin F (7) in  $\text{CDCl}_3$

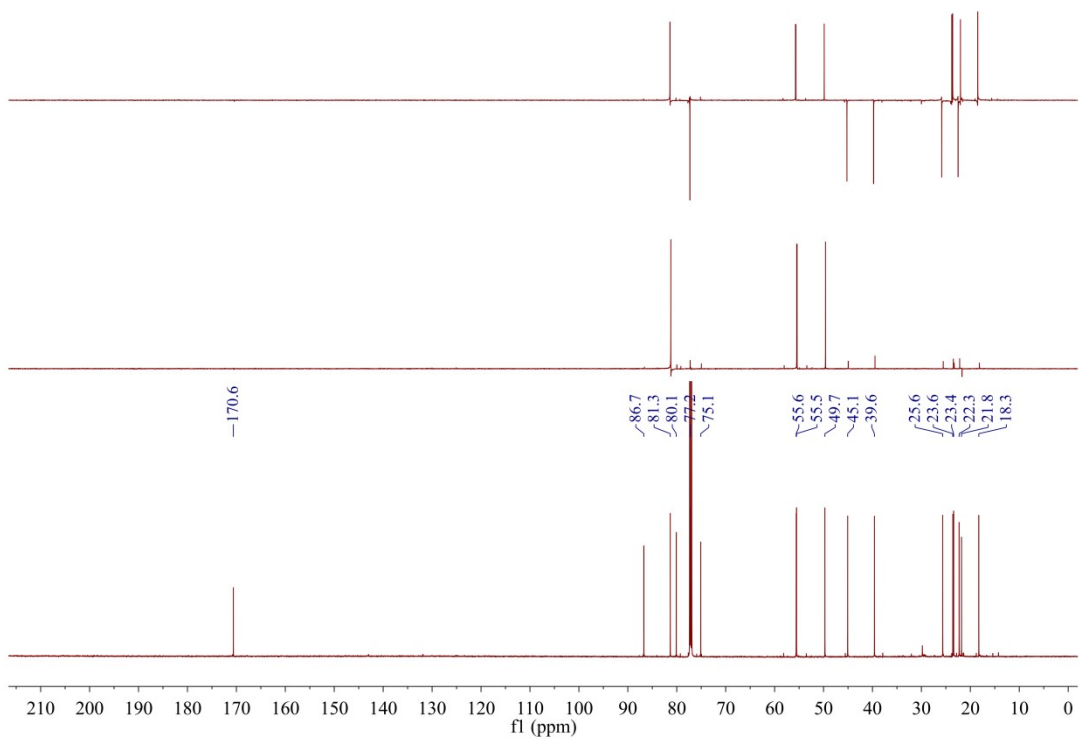

Figure S47.  $^{13}\text{C}$  NMR spectrum of magnorlin F (7) in  $\text{CDCl}_3$

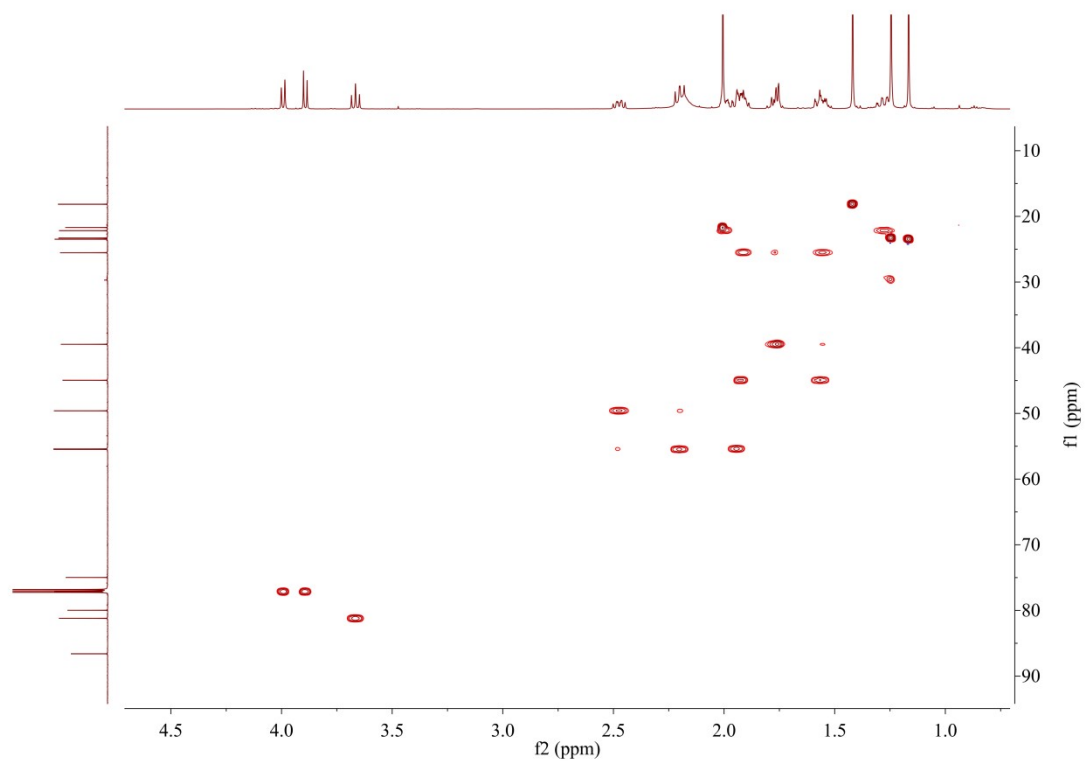

**Figure S48.** HSQC spectrum of magnorlin F (7) in  $\text{CDCl}_3$

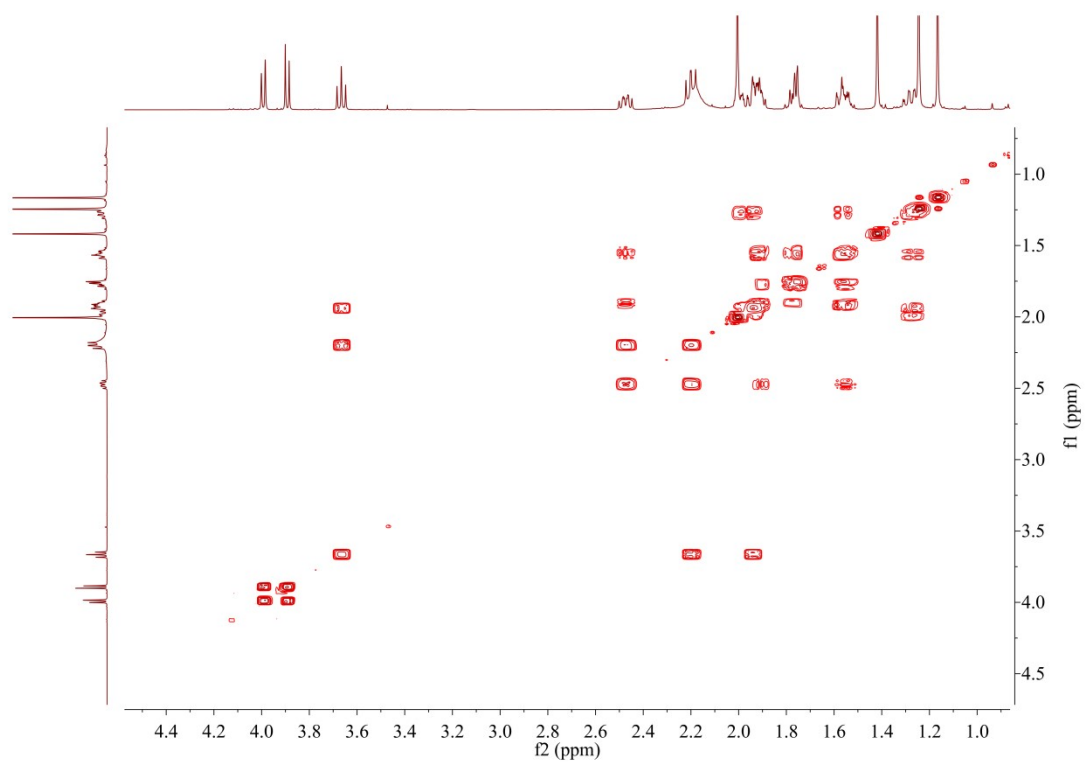

**Figure S49.** COSY spectrum of magnorlin F (7) in  $\text{CDCl}_3$

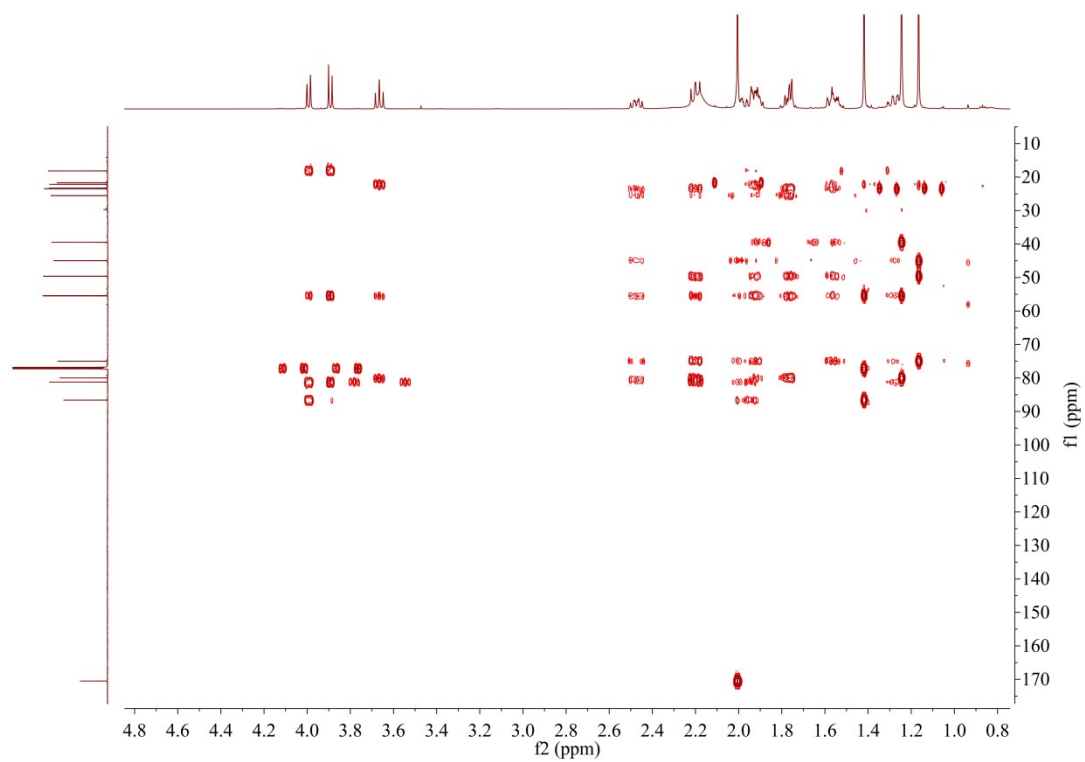

**Figure S50.** HMBC spectrum of magnorlin F (**7**) in  $\text{CDCl}_3$

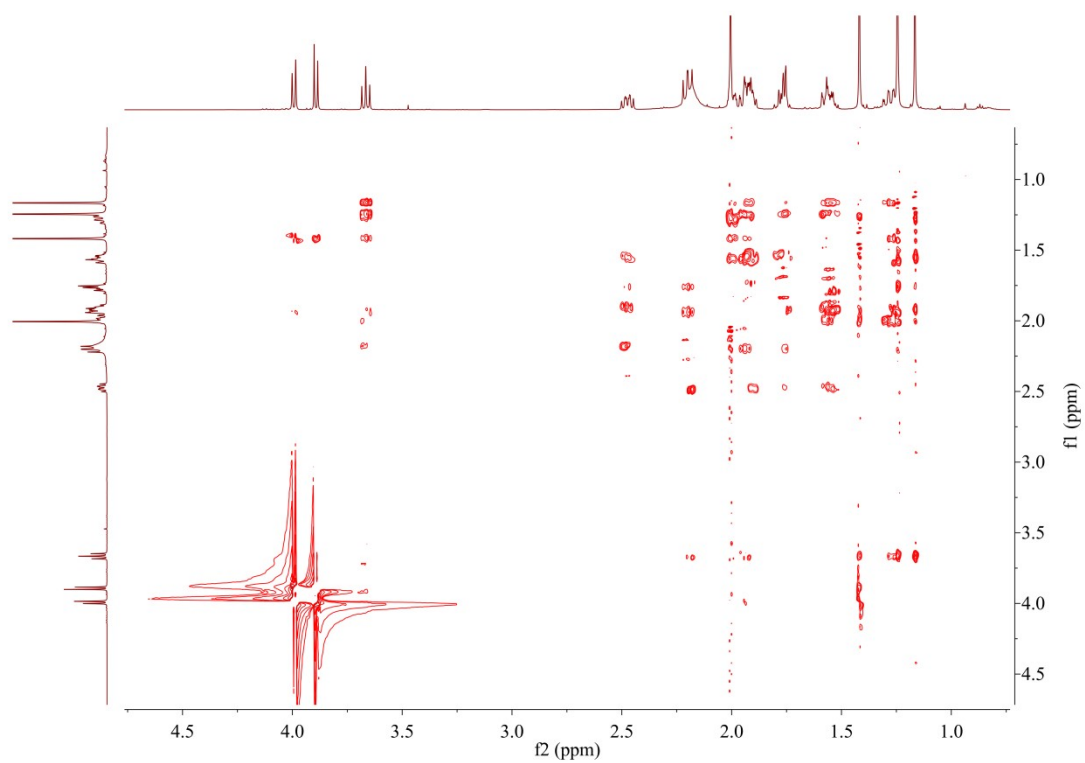

**Figure S51.** ROESY spectrum of magnorlin F (**7**) in  $\text{CDCl}_3$

Data File: D:\DATA\2025\1208\fwxz-143.lcd

| Elmt | Val. | Min | Max | Use Adduct |
|------|------|-----|-----|------|------|-----|-----|------|------|-----|-----|------|------|-----|-----|------------|
| H    | 1    | 5   | 100 | N    | 3    | 0   | 10  | Si   | 4    | 0   | 0   | Br   | 1    | 0   | 5   | Na         |
| B    | 3    | 0   | 0   | O    | 2    | 0   | 30  | S    | 2    | 0   | 0   | I    | 3    | 0   | 0   |            |
| C    | 4    | 5   | 50  | F    | 1    | 0   | 0   | Cl   | 1    | 0   | 0   |      |      |     |     |            |

Error Margin (ppm): 10  
 HC Ratio: unlimited  
 Max Isotopes: all  
 MSn Iso RI (%): 75.00

DBE Range: -2.0 - 1000.0  
 Apply N Rule: no  
 Isotope RI (%): 1.00  
 MSn Logic Mode: AND

Electron Ions: both  
 Use MSn Info: no  
 Isotope Res: 10000  
 Max Results: 50

Event#: 1 MS(E+) Ret. Time : 0.373 -> 0.400 Scan#: 57 -> 61

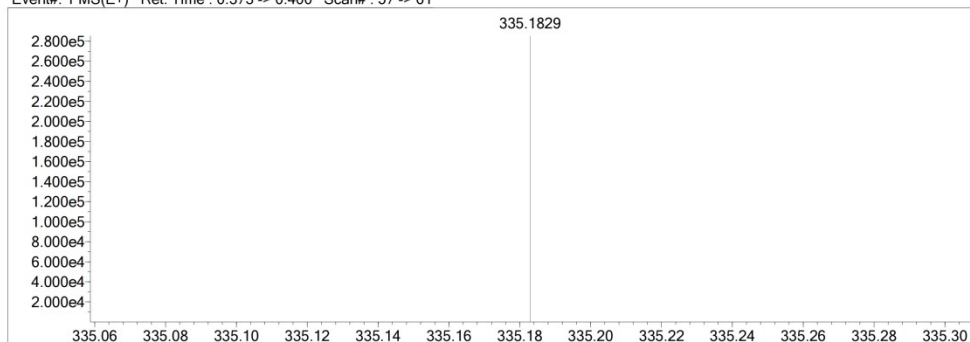

Measured region for 335.1829 m/z

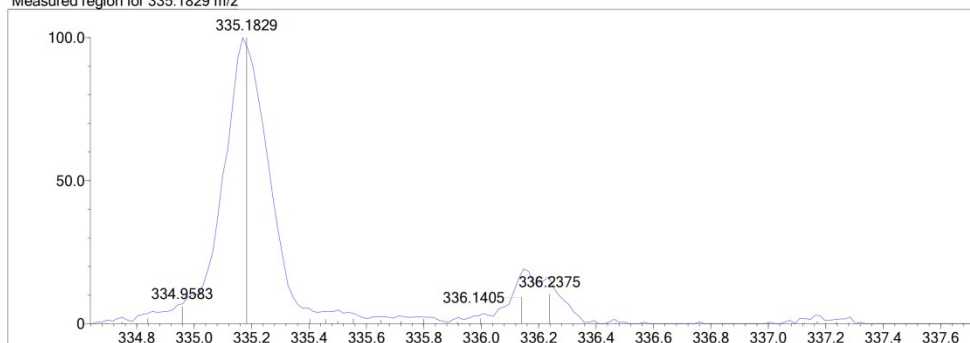

C17 H28 O5 [M+Na]+ : Predicted region for 335.1829 m/z

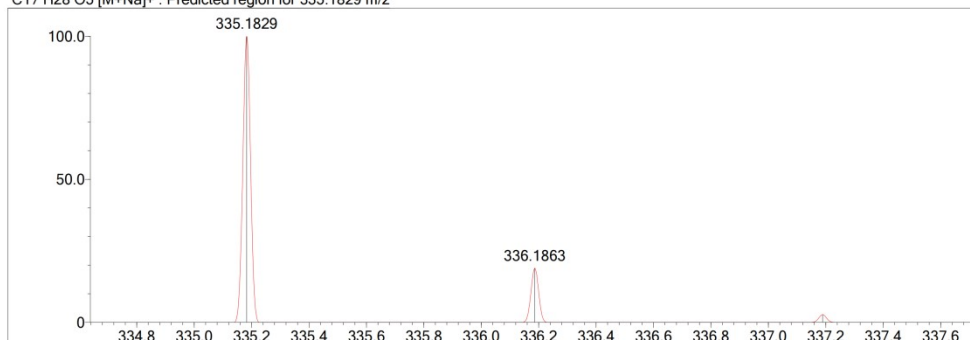

| Formula (M) | Ion     | Meas. m/z | Pred. m/z | Df. (mDa) | Df. (ppm) | DBE |
|-------------|---------|-----------|-----------|-----------|-----------|-----|
| C17 H28 O5  | [M+Na]+ | 335.1829  | 335.1829  | 0.0       | 0.00      | 4.0 |

**Figure S52.** HR-ESI-MS spectrum of magnolin F (7)

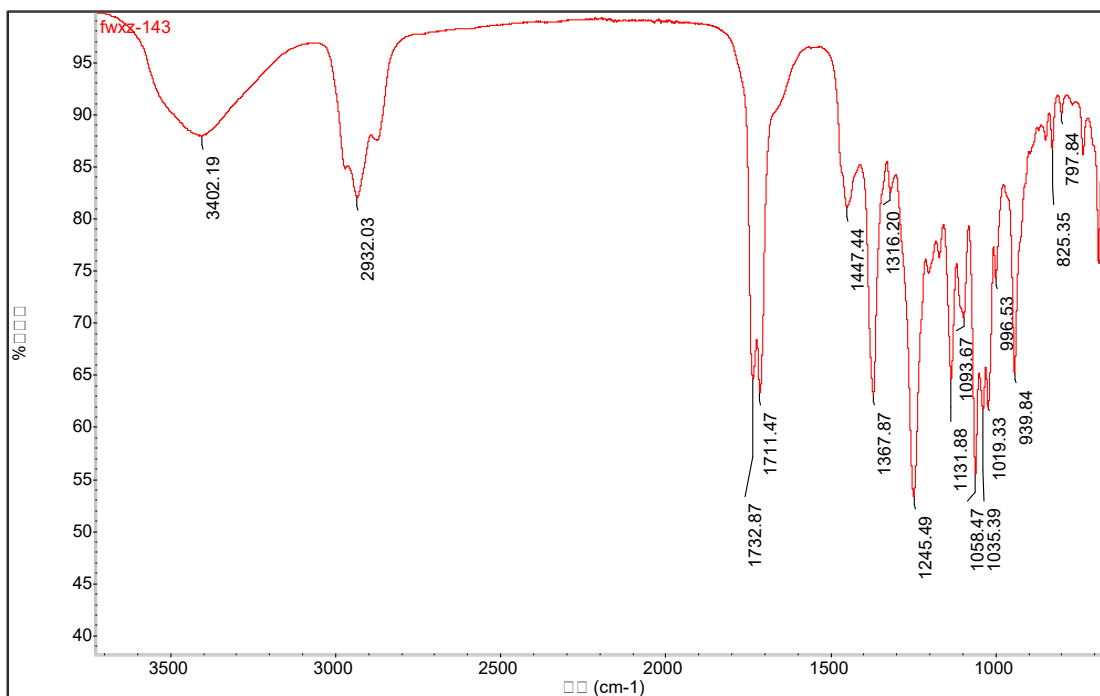

Figure S53. IR spectrum of magnolin F (7)

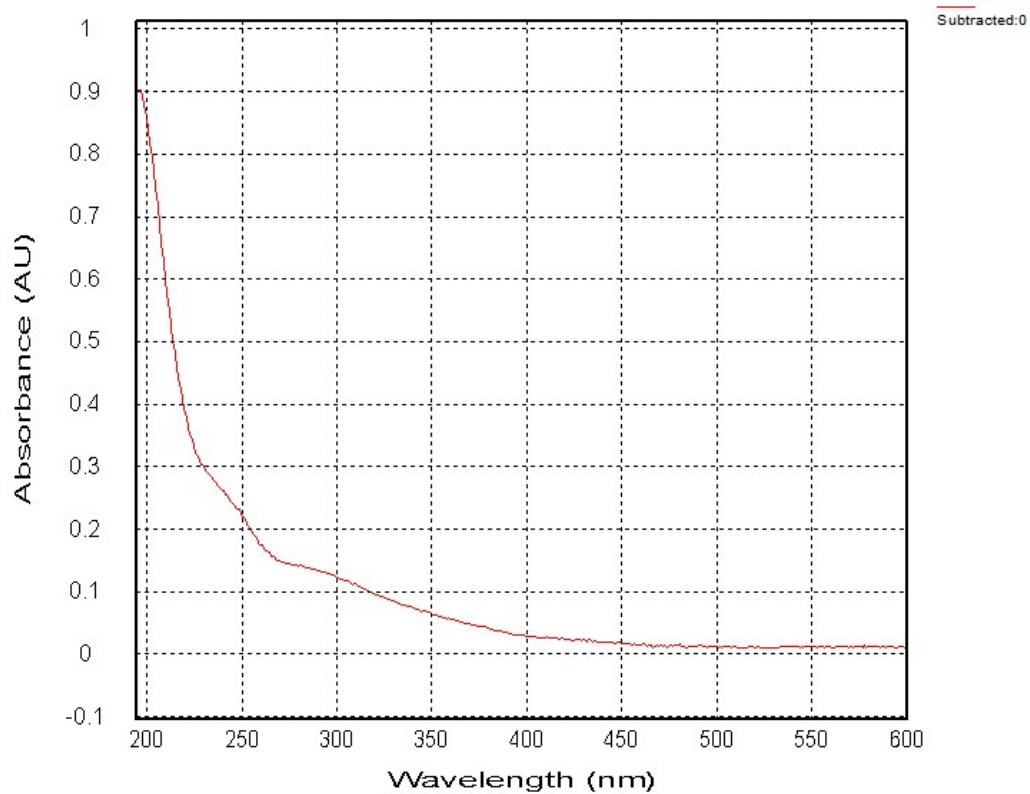

Figure S54. UV spectrum of magnolin F (7)

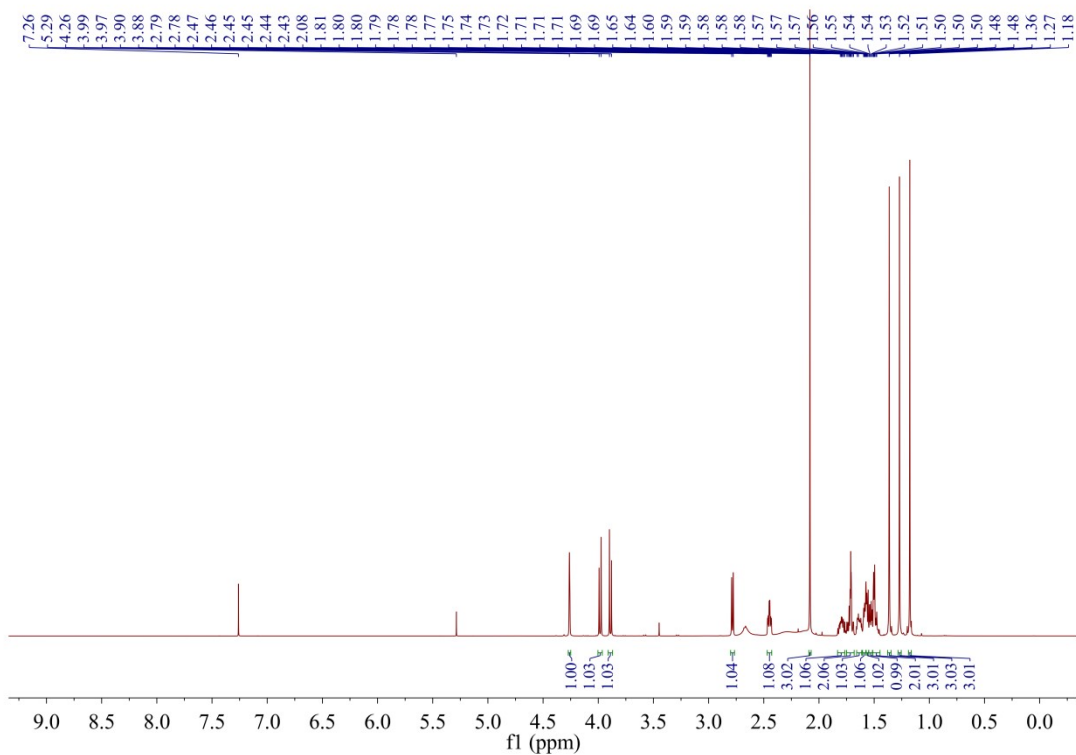

**Figure S55.**  $^1\text{H}$  NMR spectrum of magnolin G (**8**) in  $\text{CDCl}_3$

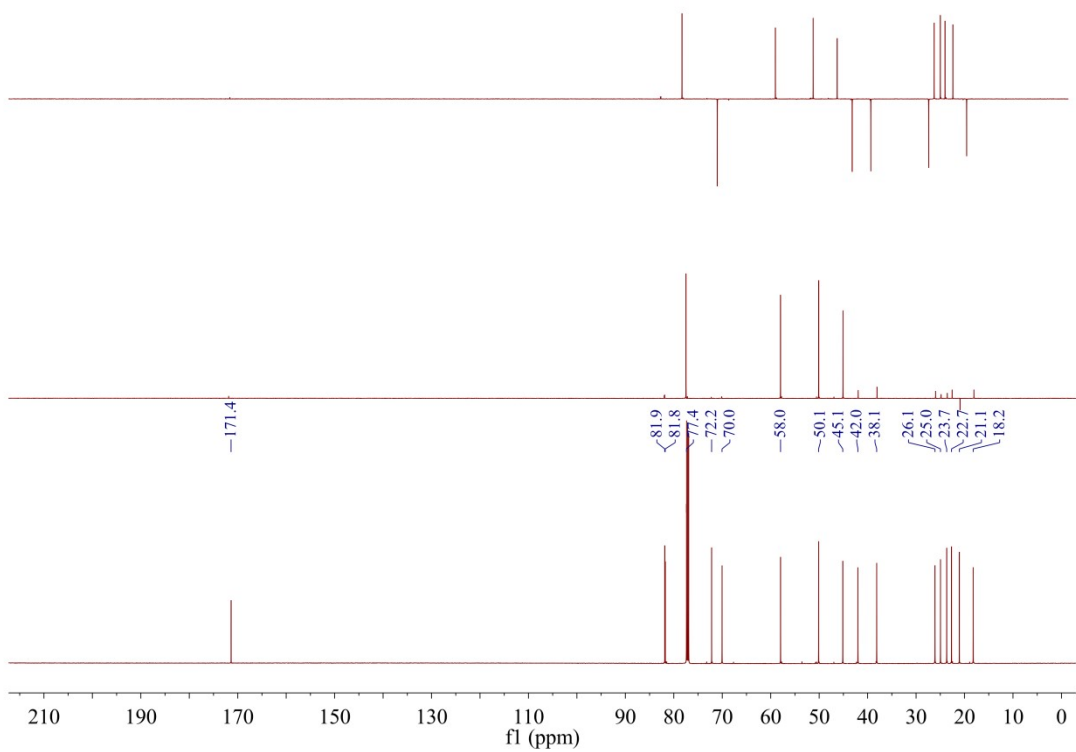

**Figure S56.**  $^{13}\text{C}$  NMR spectrum of magnolin G (**8**) in  $\text{CDCl}_3$

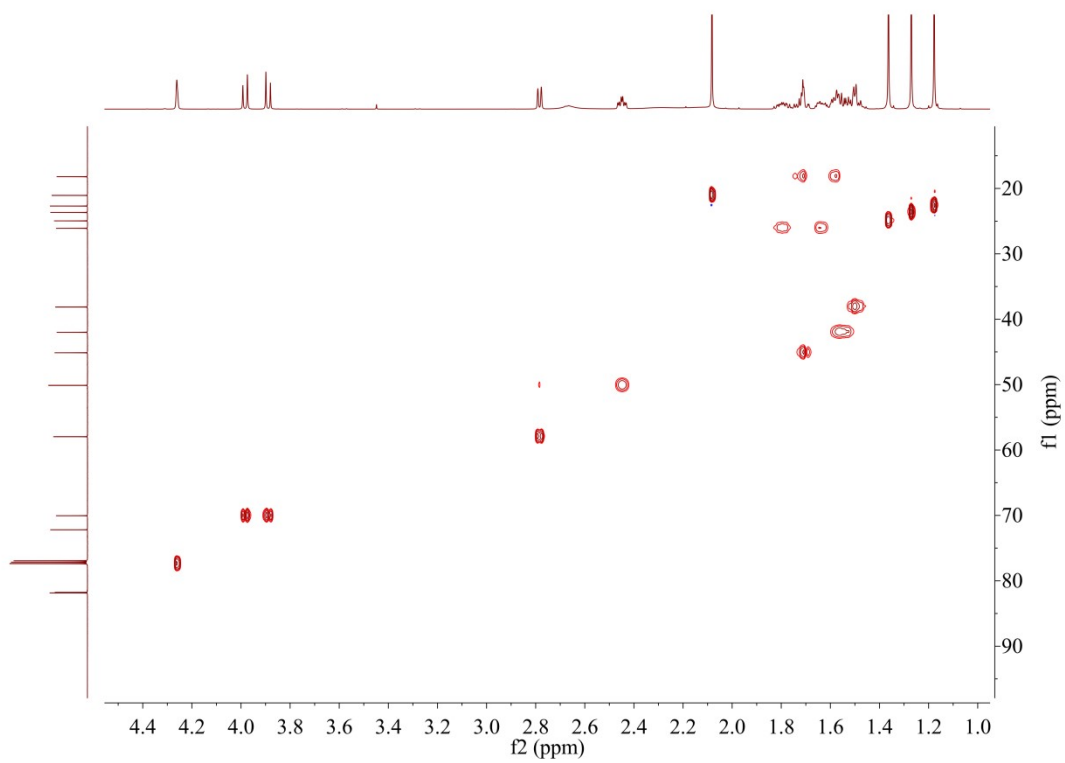

**Figure S57.** HSQC spectrum of magnolin G (**8**) in  $\text{CDCl}_3$

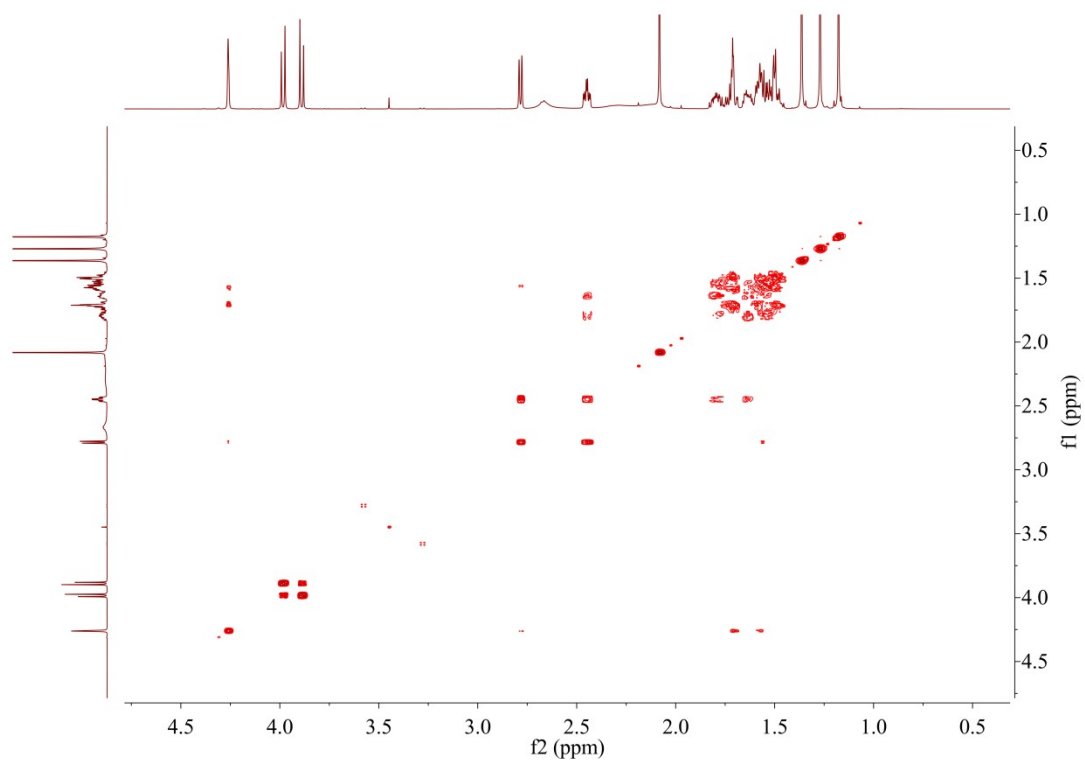

**Figure S58.** COSY spectrum of magnolin G (**8**) in  $\text{CDCl}_3$

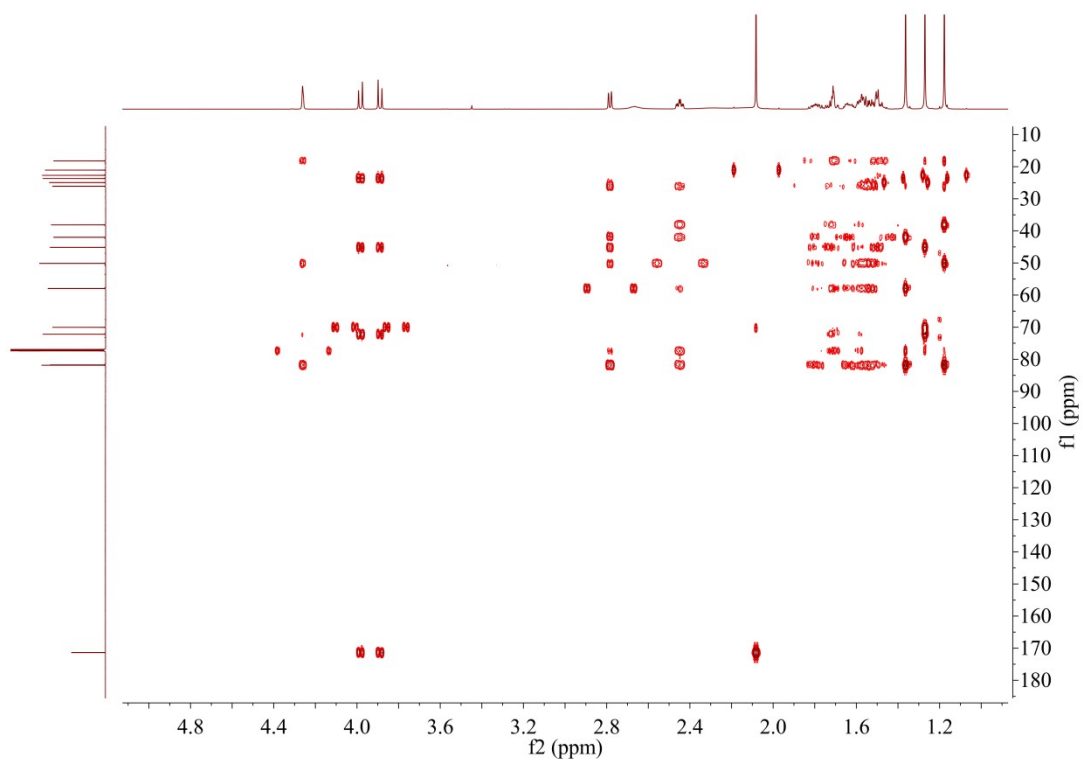

**Figure S59.** HMBC spectrum of magnolin G (**8**) in  $\text{CDCl}_3$

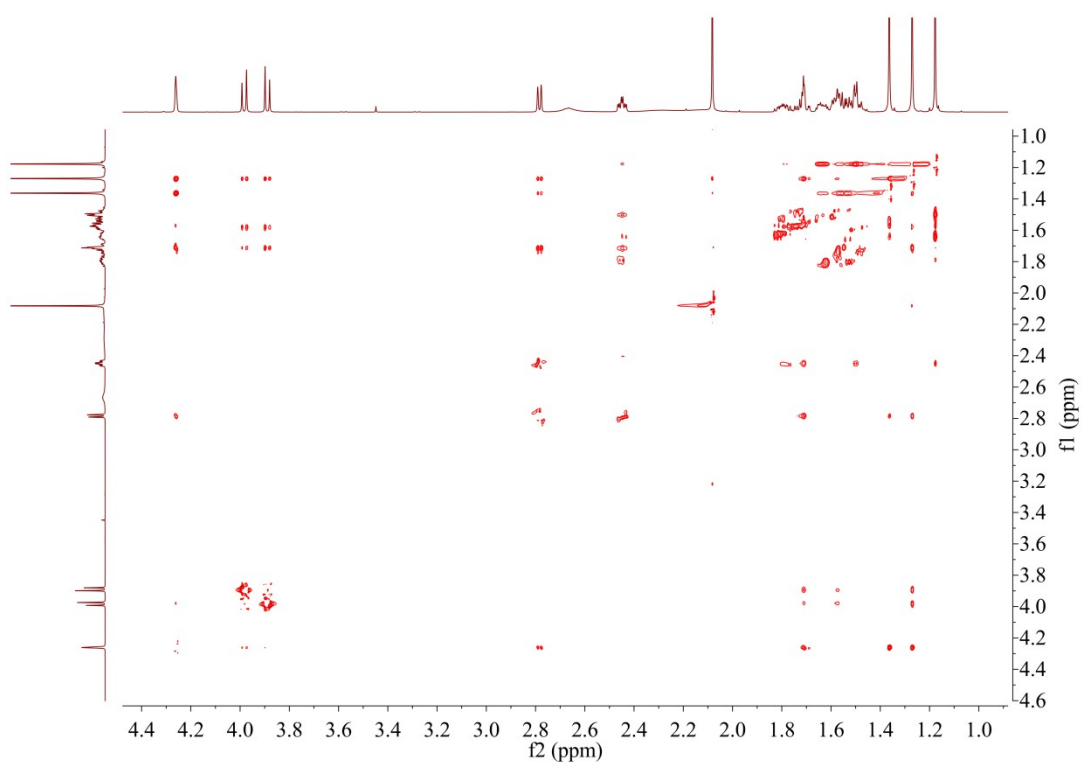

**Figure S60.** ROESY spectrum of magnolin G (**8**) in  $\text{CDCl}_3$

Data File: D:\DATA\2025\1104\fwz-126.lcd

| Elmt | Val. | Min | Max | Elmt | Val. | Min | Max | Elmt | Val. | Min | Max | Use Adduct |
|------|------|-----|-----|------|------|-----|-----|------|------|-----|-----|------------|
| H    | 1    | 5   | 100 | N    | 3    | 0   | 10  | Si   | 4    | 0   | 0   | H          |
| B    | 3    | 0   | 0   | O    | 2    | 0   | 20  | S    | 2    | 0   | 0   | Na         |
| C    | 4    | 10  | 50  | F    | 1    | 0   | 0   | Cl   | 1    | 0   | 0   |            |

Error Margin (ppm): 5  
 HC Ratio: unlimited  
 Max Isotopes: all  
 MSn Iso RI (%): 75.00

DBE Range: -2.0 - 1000.0  
 Apply N Rule: no  
 Isotope RI (%): 1.00  
 MSn Logic Mode: AND

Electron Ions: both  
 Use MSn Info: no  
 Isotope Res: 10000  
 Max Results: 50

Event#: 1 MS(E+) Ret. Time : 0.373 -> 0.413 Scan#: 57 -> 63

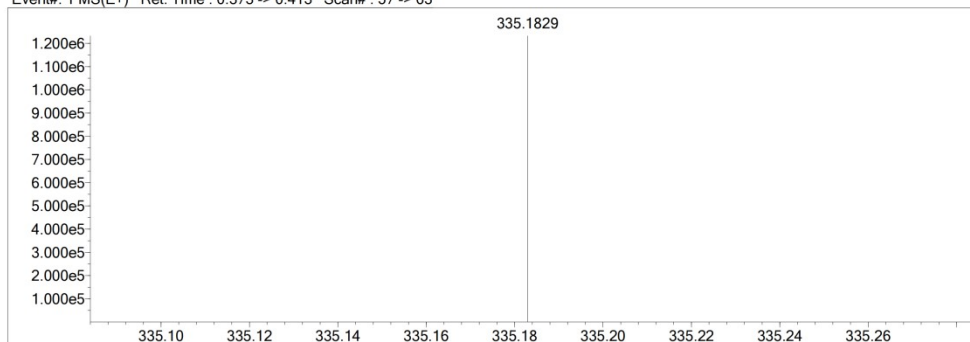

Measured region for 335.1829 m/z

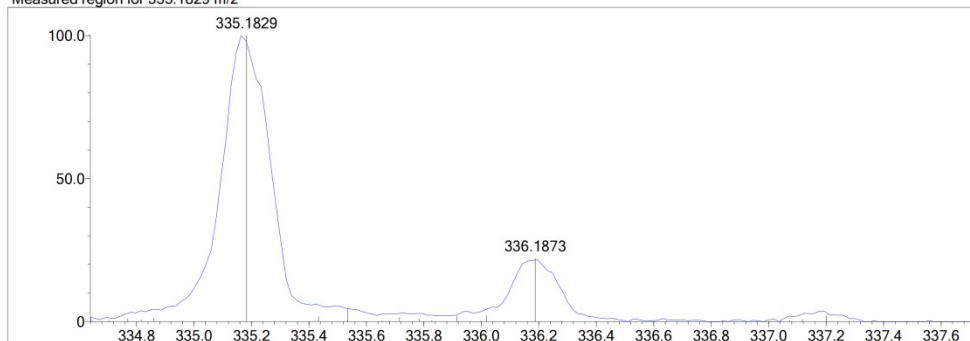

C17 H28 O5 [M+Na]+ : Predicted region for 335.1829 m/z

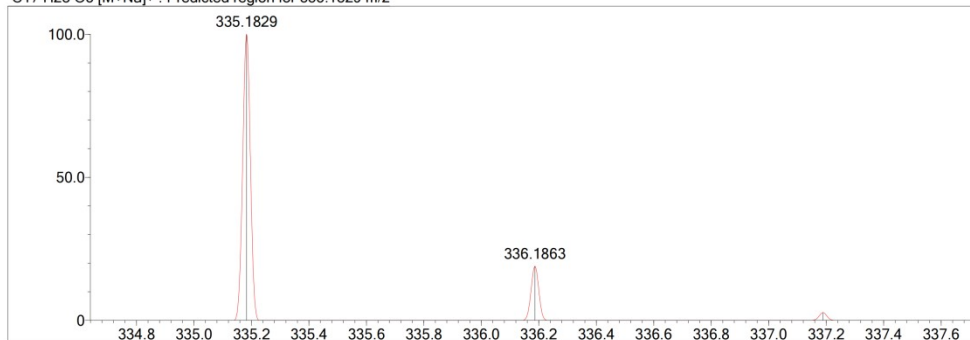

| Formula (M) | Ion     | Meas. m/z | Pred. m/z | Df. (mDa) | Df. (ppm) | DBE |
|-------------|---------|-----------|-----------|-----------|-----------|-----|
| C17 H28 O5  | [M+Na]+ | 335.1829  | 335.1829  | 0.0       | 0.00      | 4.0 |

**Figure S61.** HR-ESI-MS spectrum of magnolin G (8)

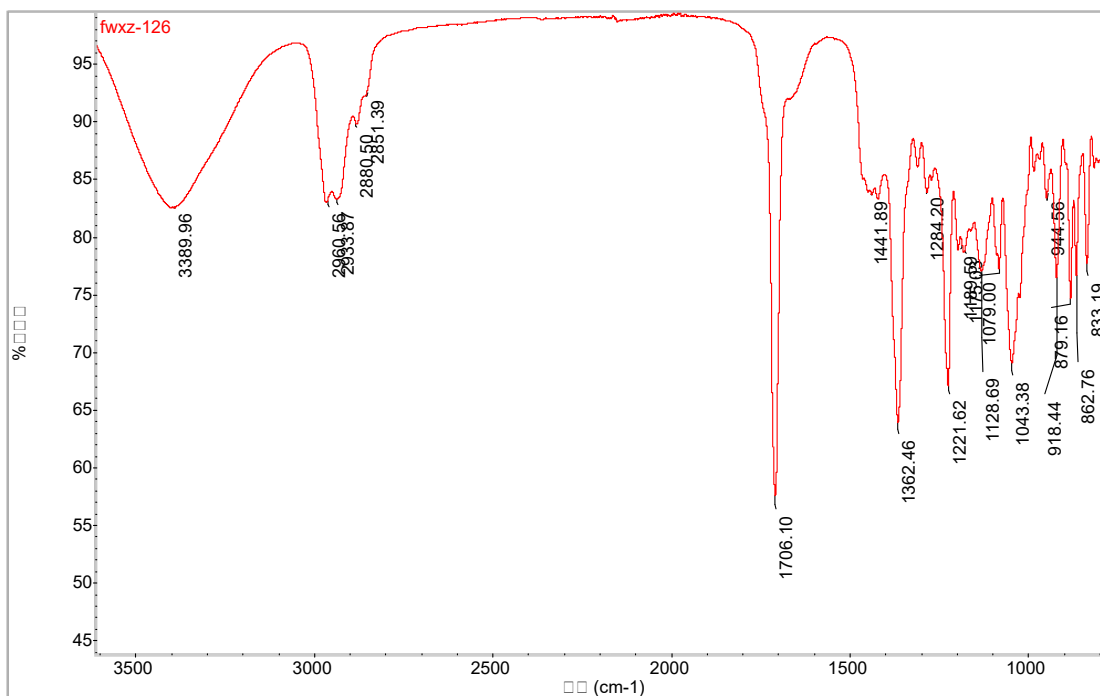

**Figure S62.** IR spectrum of magnolin G (**8**)

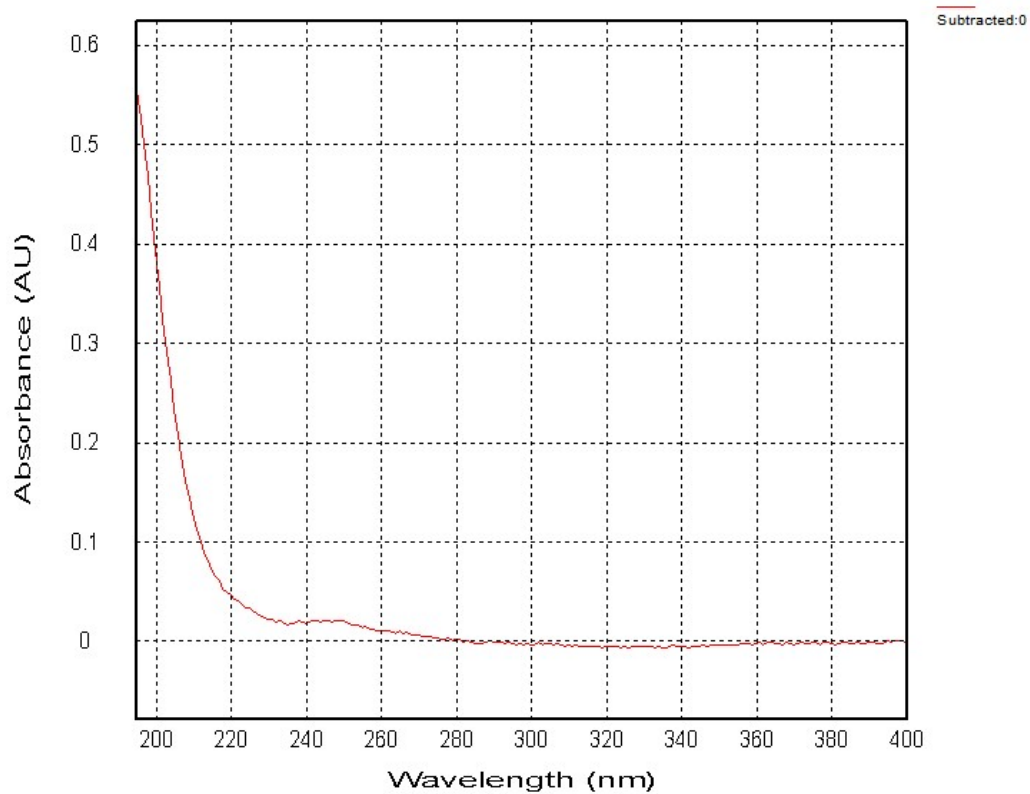

**Figure S63.** UV spectrum of magnolin G (**8**)

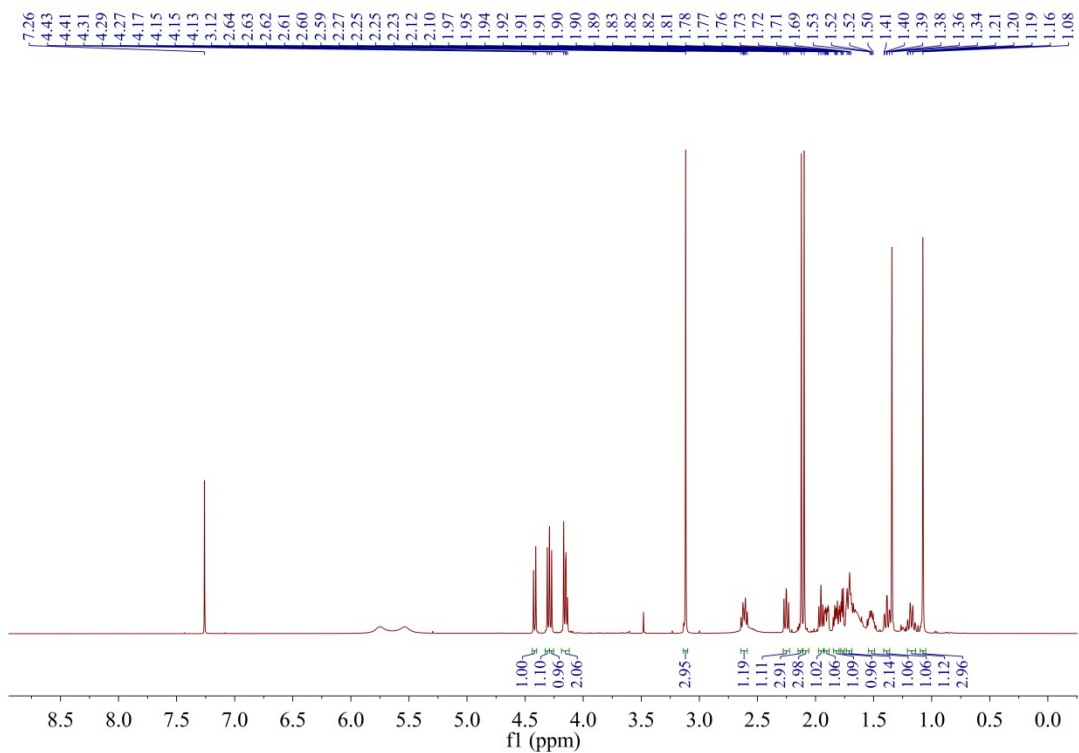

**Figure S64.**  $^1\text{H}$  NMR spectrum of magnolin H (**9**) in  $\text{CDCl}_3$

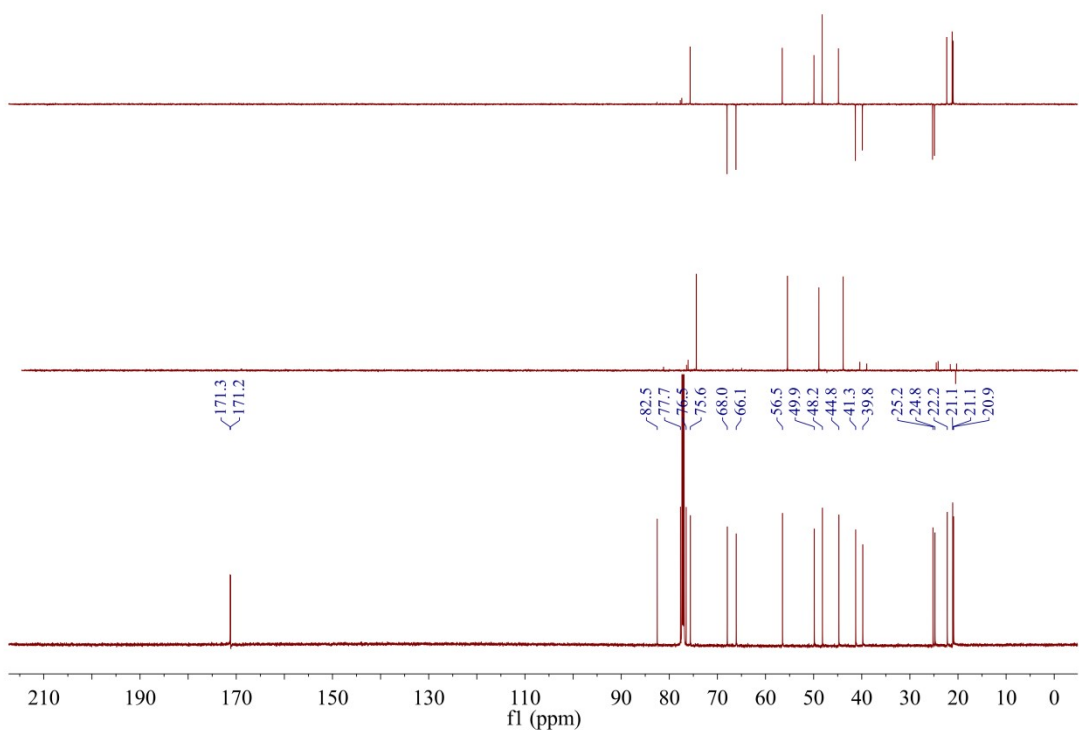

**Figure S65.**  $^{13}\text{C}$  NMR spectrum of magnolin H (**9**) in  $\text{CDCl}_3$

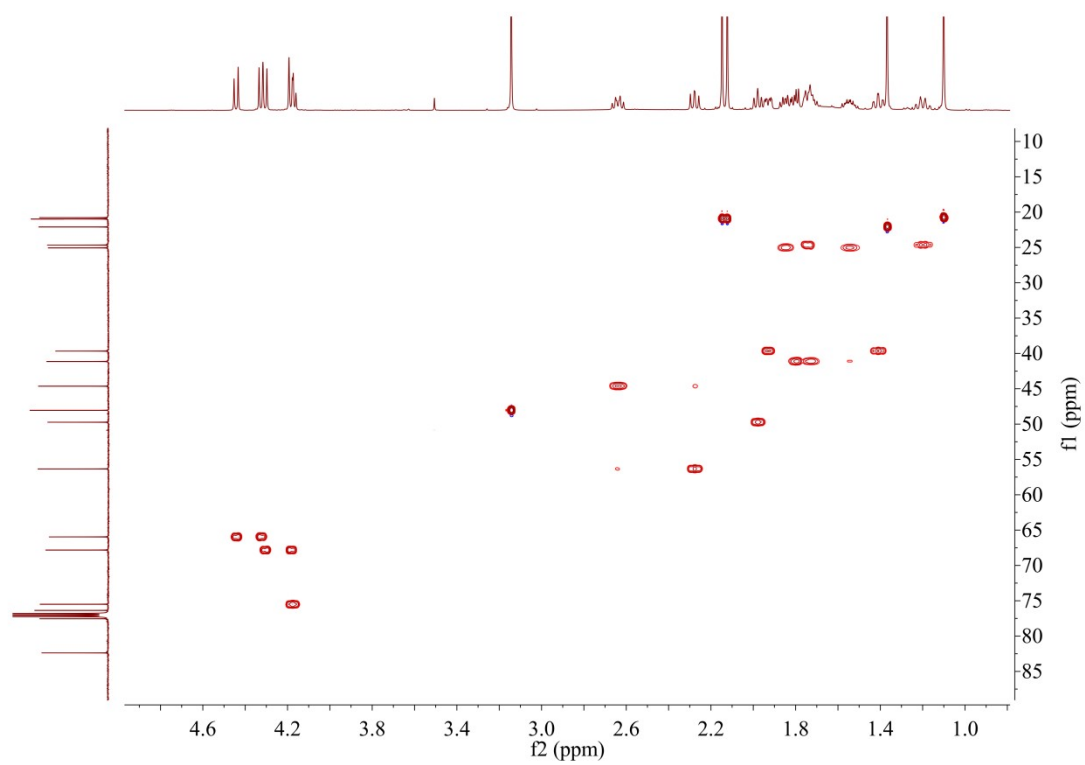

**Figure S66.** HSQC spectrum of magnolin H (**9**) in  $\text{CDCl}_3$

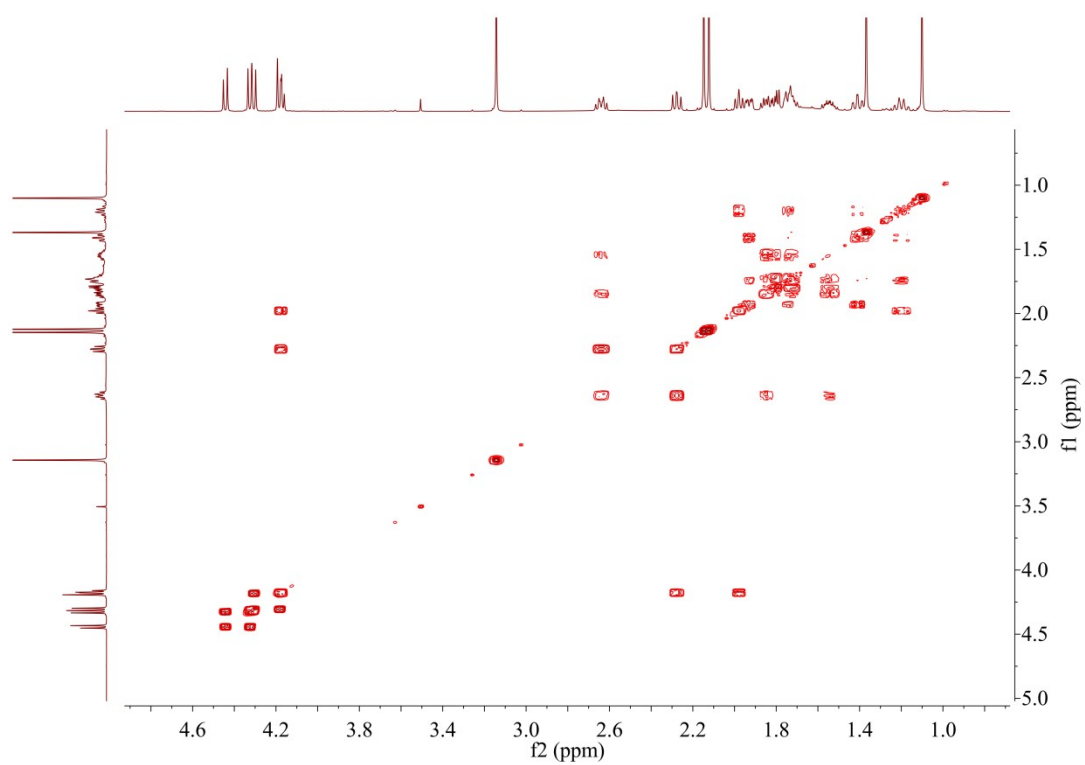

**Figure S67.** COSY spectrum of magnolin H (**9**) in  $\text{CDCl}_3$

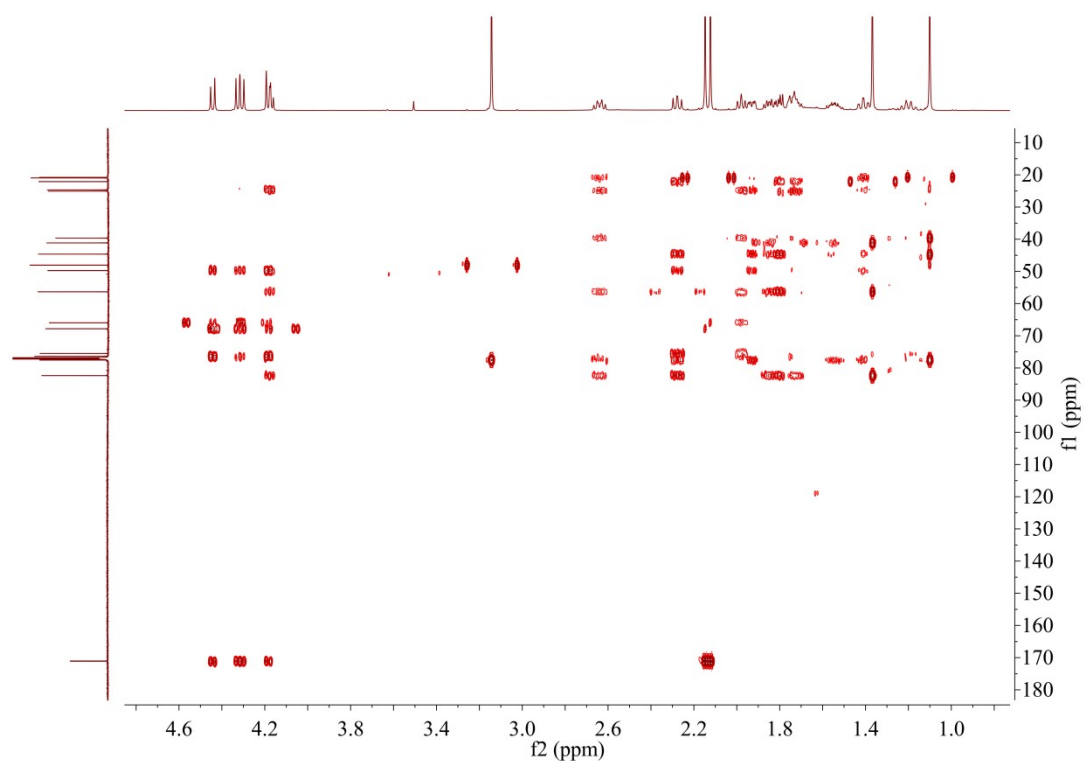

**Figure S68.** HMBC spectrum of magnolin H (**9**) in  $\text{CDCl}_3$

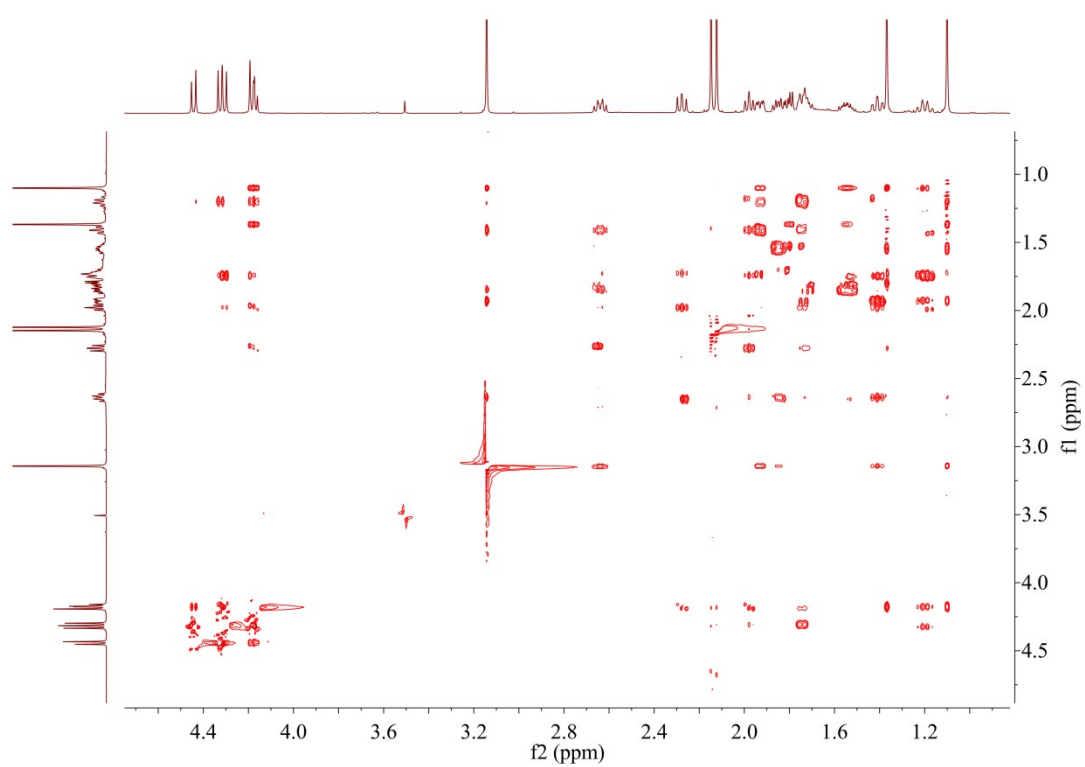

**Figure S69.** ROESY spectrum of magnolin H (**9**) in  $\text{CDCl}_3$

Data File: D:\DATA\2025\1104\fwxz-130.lcd

| Elmt | Val. | Min | Max | Elmt | Val. | Min | Max | Elmt | Val. | Min | Max | Use Adduct |
|------|------|-----|-----|------|------|-----|-----|------|------|-----|-----|------------|
| H    | 1    | 5   | 100 | N    | 3    | 0   | 10  | Si   | 4    | 0   | 0   | H          |
| B    | 3    | 0   | 0   | O    | 2    | 0   | 20  | S    | 2    | 0   | 0   | Na         |
| C    | 4    | 10  | 50  | F    | 1    | 0   | 0   | Cl   | 1    | 0   | 0   |            |

Error Margin (ppm): 5  
 HC Ratio: unlimited  
 Max Isotopes: all  
 MSn Iso RI (%): 75.00

DBE Range: -2.0 - 1000.0  
 Apply N Rule: no  
 Isotope RI (%): 1.00  
 MSn Logic Mode: AND

Electron Ions: both  
 Use MSn Info: no  
 Isotope Res: 10000  
 Max Results: 50

Event#: 1 MS(E+) Ret. Time : 0.840 -> 0.960 Scan#: 127 -> 145

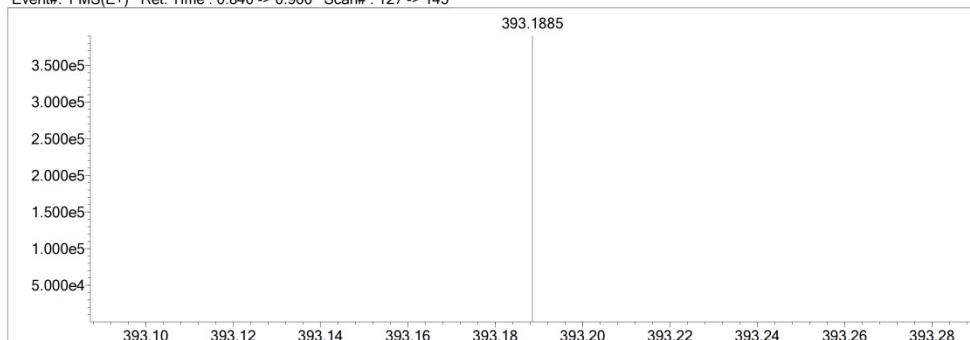

Measured region for 393.1885 m/z

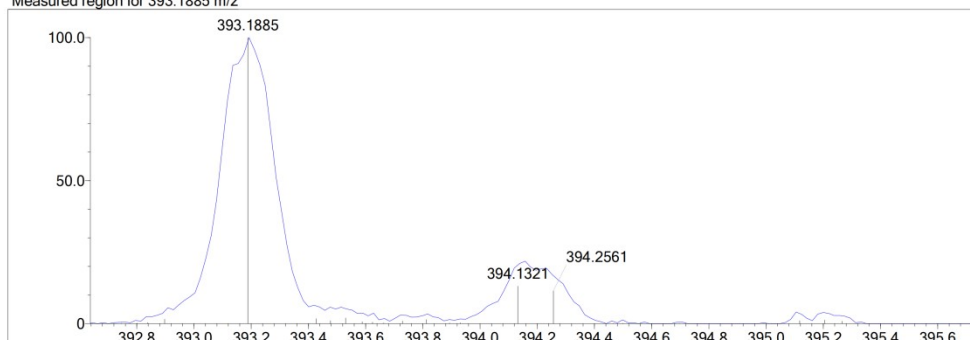

C19 H30 O7 [M+Na]+ : Predicted region for 393.1884 m/z

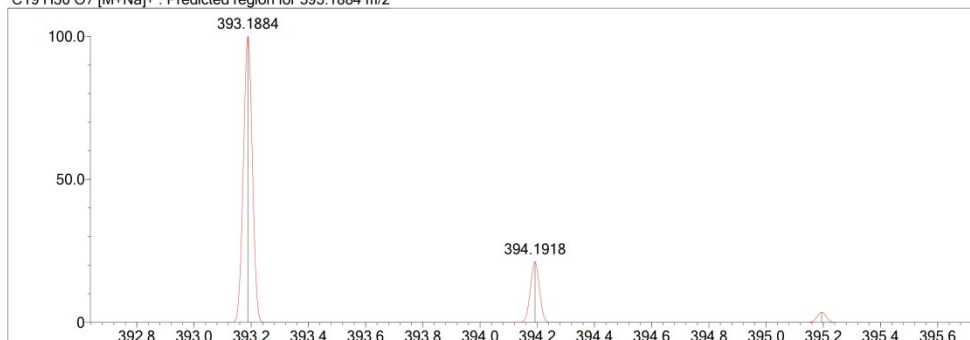

| Formula (M) | Ion     | Meas. m/z | Pred. m/z | Df. (mDa) | Df. (ppm) | DBE |
|-------------|---------|-----------|-----------|-----------|-----------|-----|
| C19 H30 O7  | [M+Na]+ | 393.1885  | 393.1884  | 0.1       | 0.25      | 5.0 |

**Figure S70.** HR-ESI-MS spectrum of magnolin H (9)

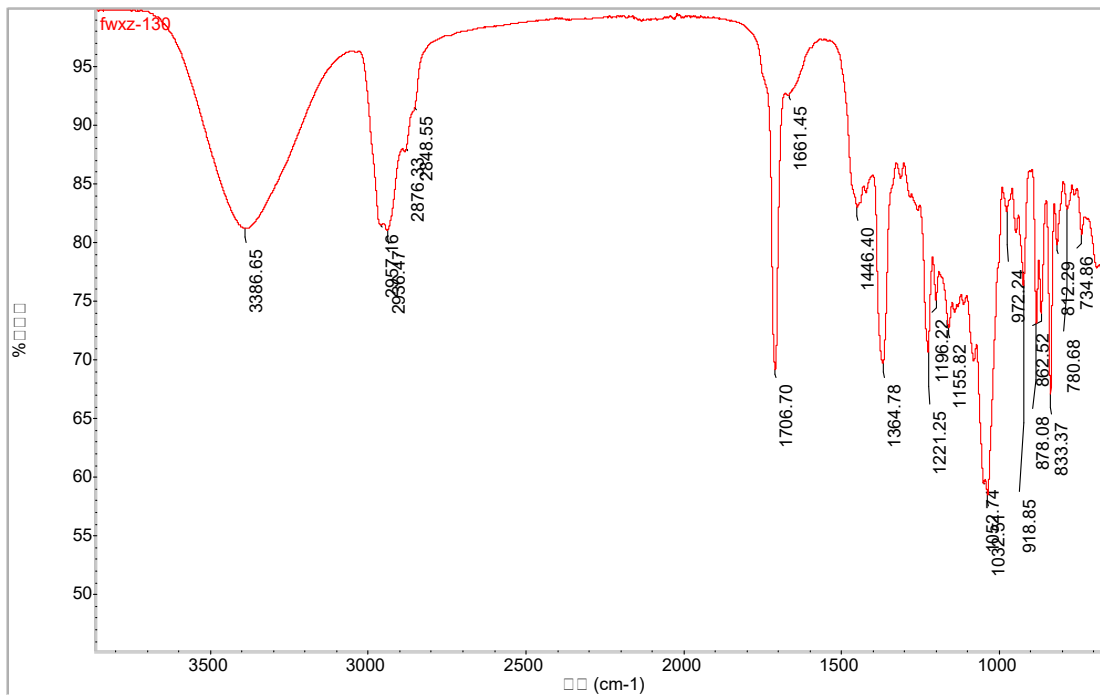

Figure S71. IR spectrum of magnolin H (9)

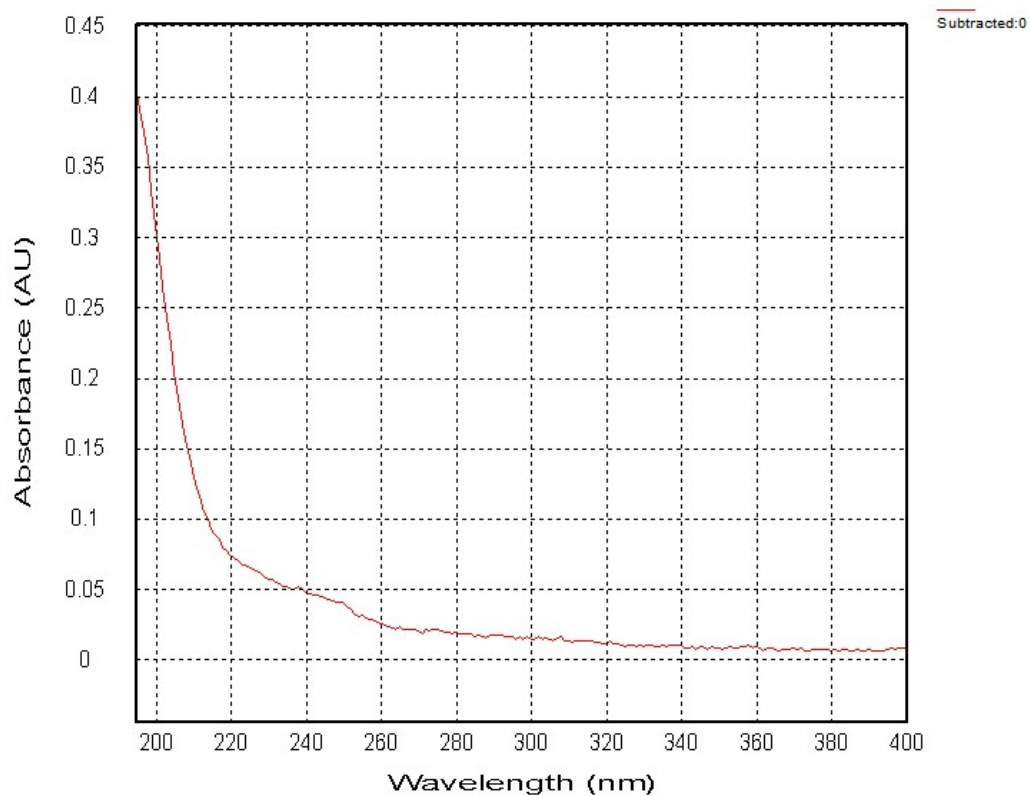

Figure S72. IR spectrum of magnolin H (9)

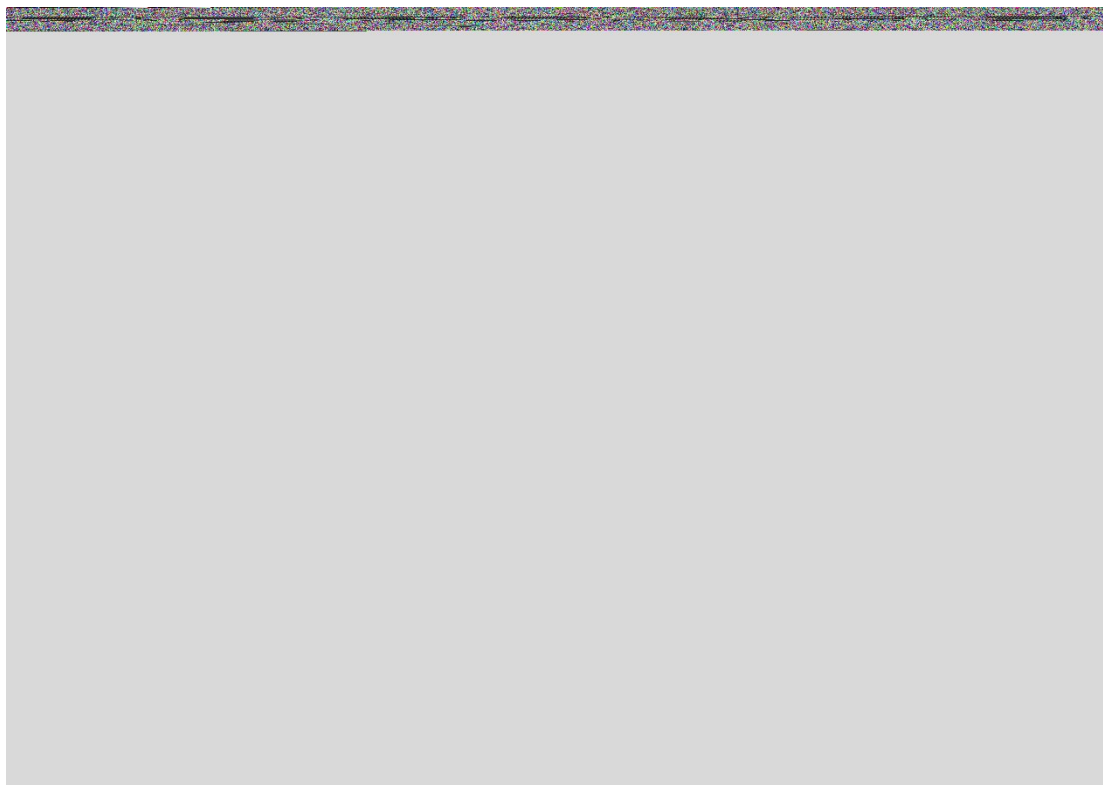

**Figure S73.** <sup>1</sup>H NMR spectrum of magnolin I (**10**) in CDCl<sub>3</sub>

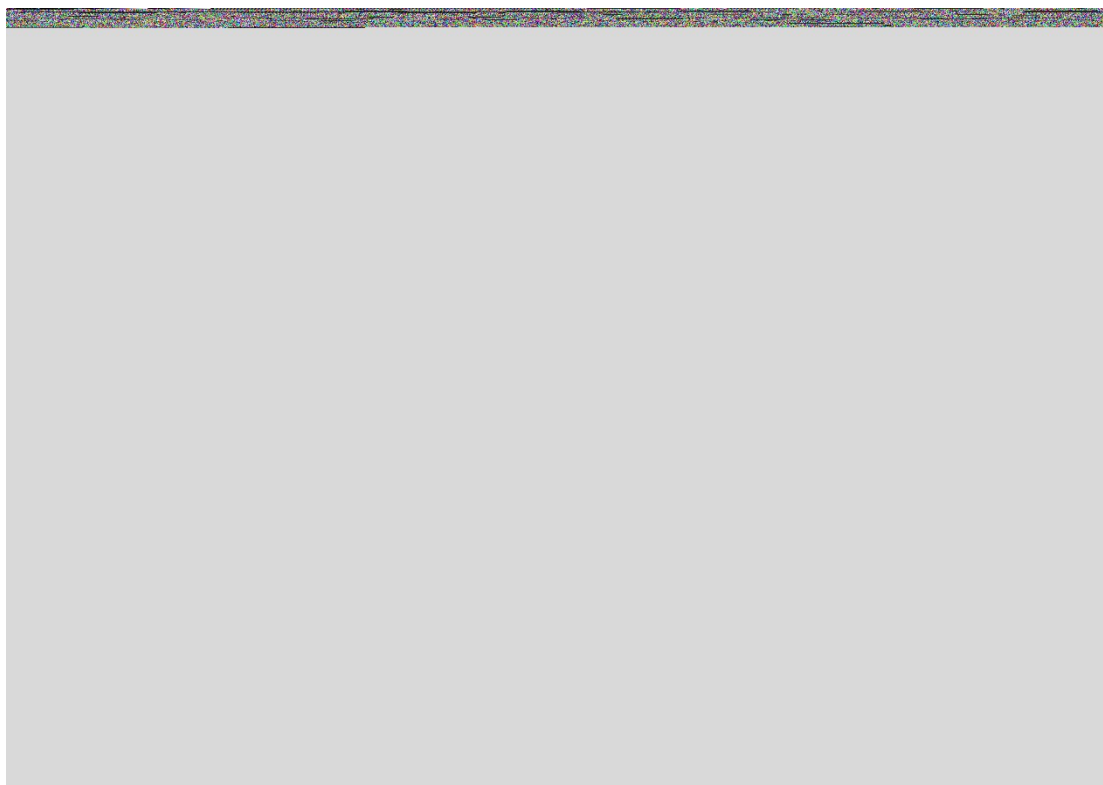

**Figure S74.** <sup>13</sup>C NMR spectrum of magnolin I (**10**) in CDCl<sub>3</sub>

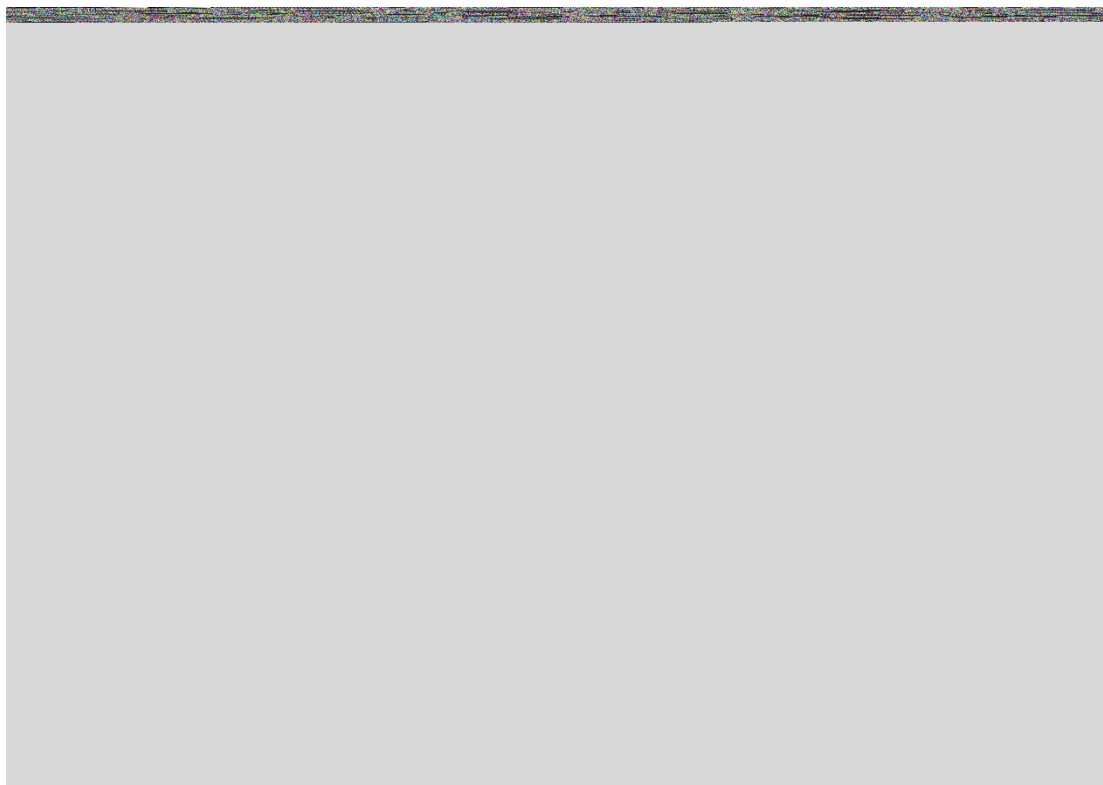

**Figure S75.** HSQC spectrum of magnolin I (**10**) in CDCl<sub>3</sub>

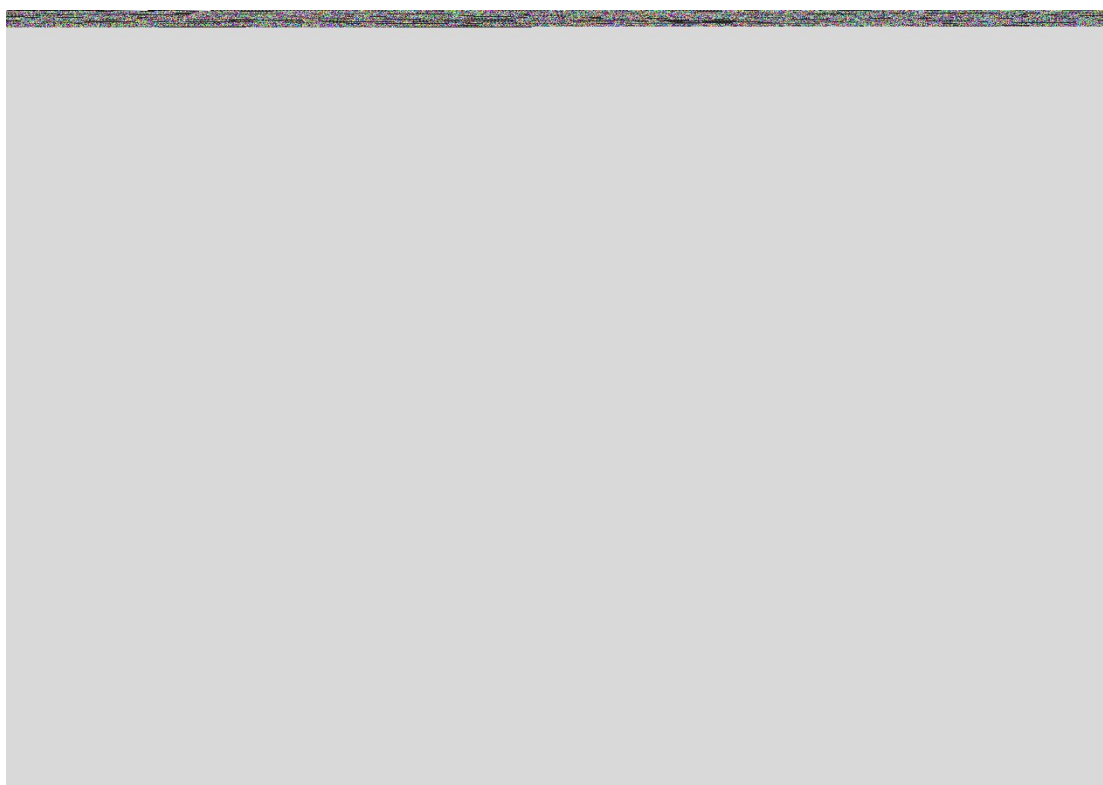

**Figure S76.** COSY spectrum of magnolin I (**10**) in CDCl<sub>3</sub>

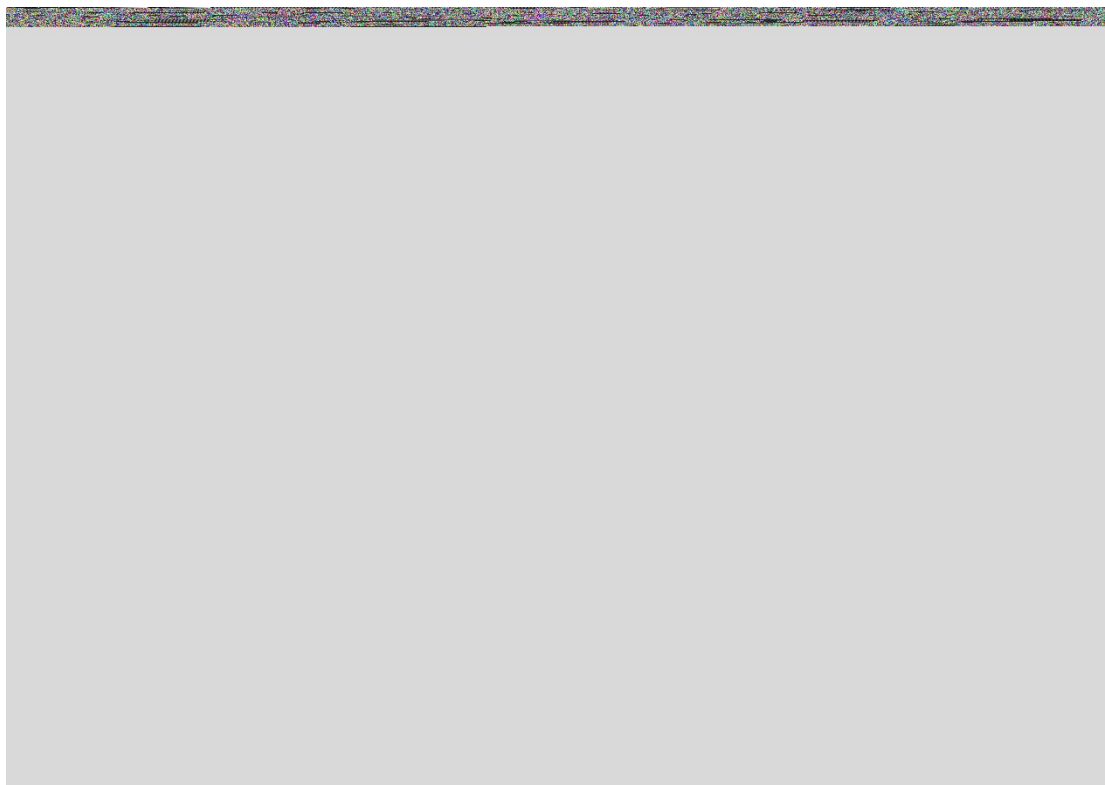

**Figure S77.** HMBC spectrum of magnolin I (**10**) in  $\text{CDCl}_3$

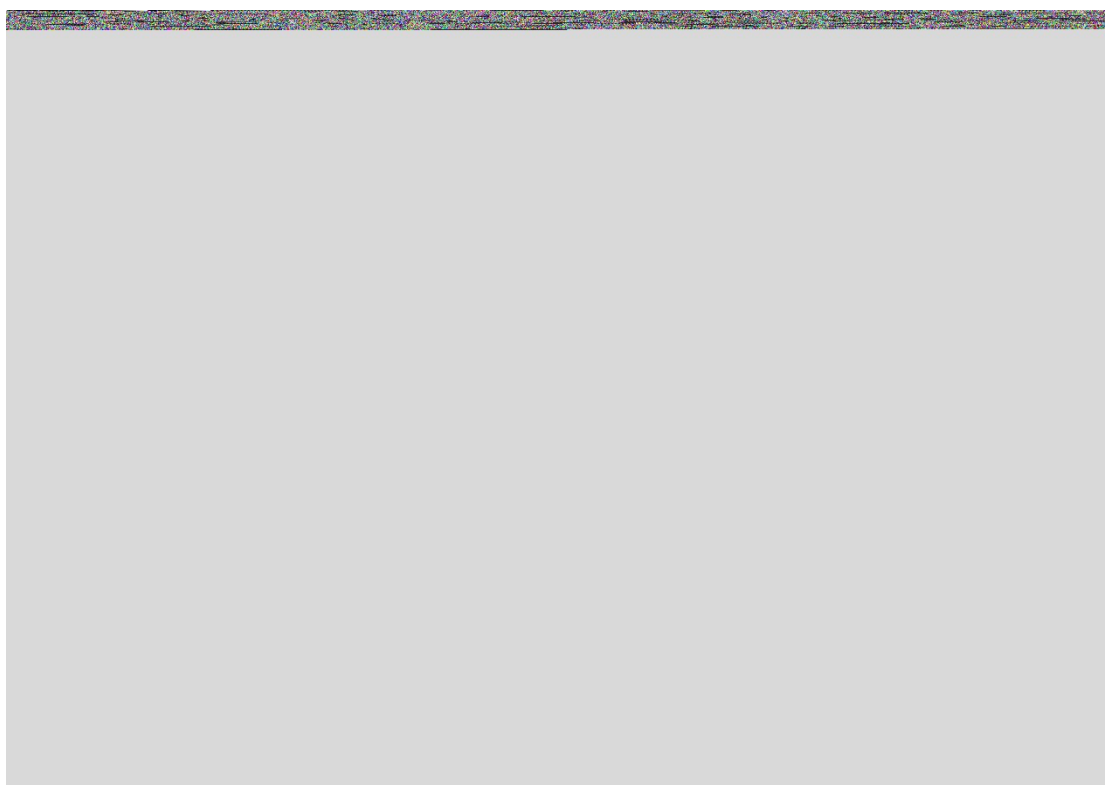

**Figure S78.** ROESY spectrum of magnolin I (**10**) in  $\text{CDCl}_3$

Data File: D:\DATA\2025\1031\fwxz-133.lcd

| Elmt | Val. | Min | Max | Elmt | Val. | Min | Max | Elmt | Val. | Min | Max | Use Adduct |
|------|------|-----|-----|------|------|-----|-----|------|------|-----|-----|------------|
| H    | 1    | 5   | 100 | N    | 3    | 0   | 10  | Si   | 4    | 0   | 0   | H          |
| B    | 3    | 0   | 0   | O    | 2    | 0   | 20  | S    | 2    | 0   | 0   | Na         |
| C    | 4    | 10  | 50  | F    | 1    | 0   | 0   | Cl   | 1    | 0   | 5   |            |

Error Margin (ppm): 5  
 HC Ratio: unlimited  
 Max Isotopes: all  
 MSn Iso RI (%): 75.00

DBE Range: -2.0 - 1000.0  
 Apply N Rule: no  
 Isotope RI (%): 1.00  
 MSn Logic Mode: AND

Electron Ions: both  
 Use MSn Info: no  
 Isotope Res: 10000  
 Max Results: 50

Event#: 1 MS(E+) Ret. Time : 0.307 -> 1.000 Scan#: 47 -> 151

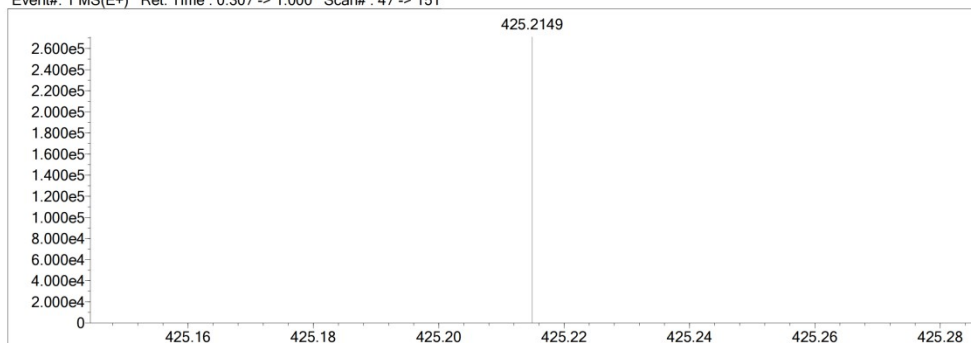

Measured region for 425.2149 m/z

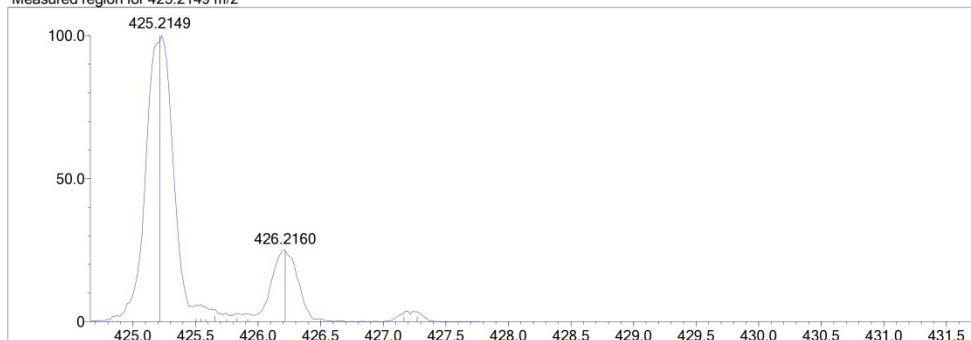

C20 H34 O8 [M+Na]+ : Predicted region for 425.2146 m/z

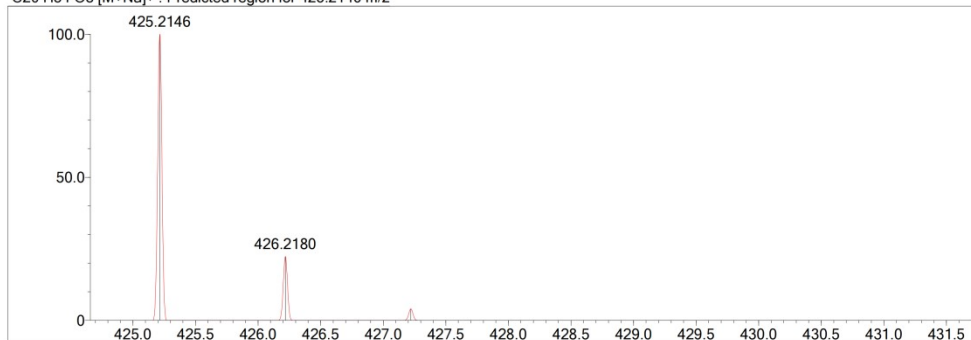

| Formula (M) | Ion     | Meas. m/z | Pred. m/z | Df. (mDa) | Df. (ppm) | DBE |
|-------------|---------|-----------|-----------|-----------|-----------|-----|
| C20 H34 O8  | [M+Na]+ | 425.2149  | 425.2146  | 0.3       | 0.71      | 4.0 |

**Figure S79.** HR-ESI-MS spectrum of magnolin I (10)

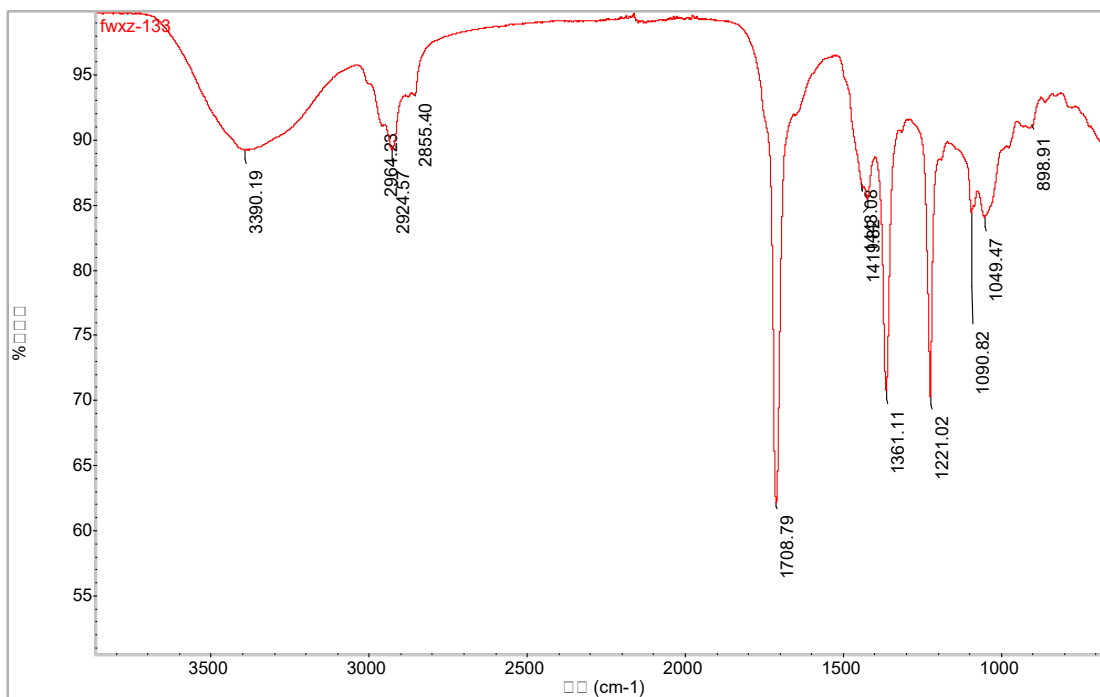

**Figure S80.** IR spectrum of magnolin I (10)

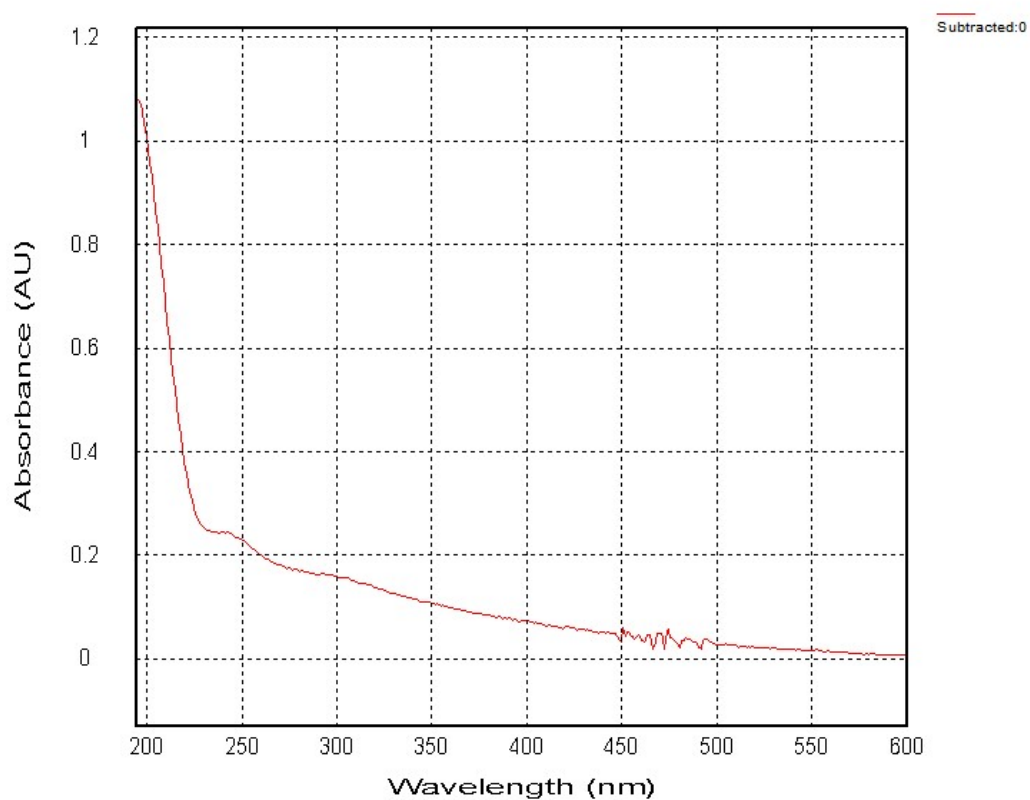

**Figure S81.** UV spectrum of magnolin I (10)

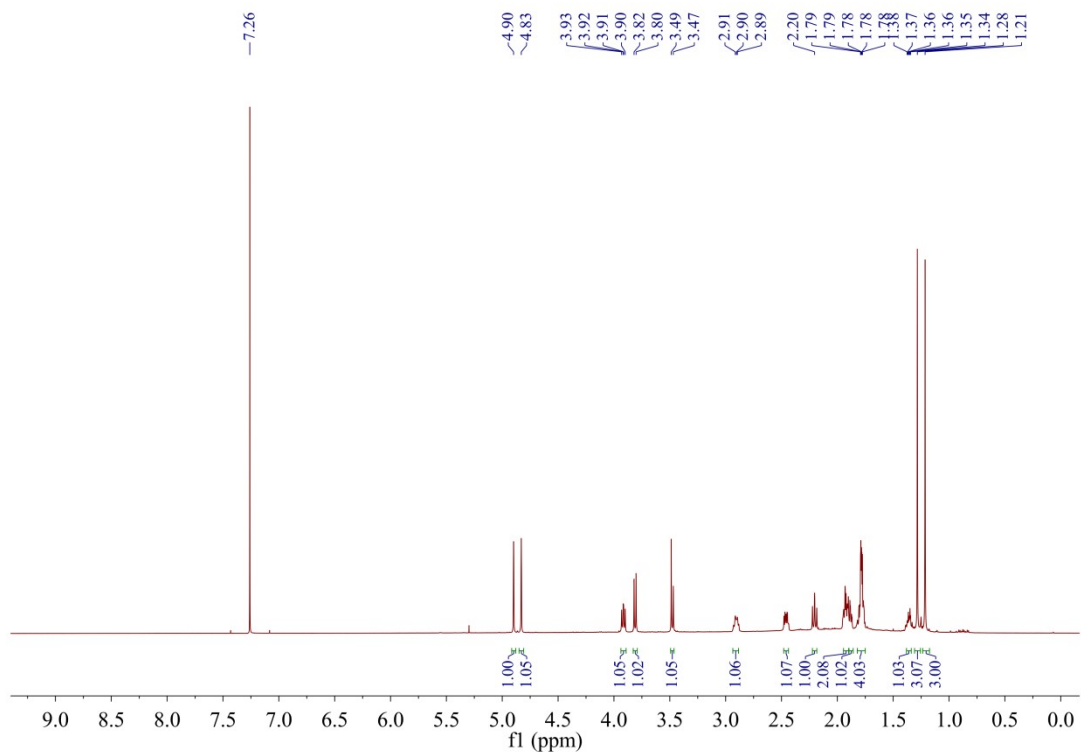

**Figure S82.**  $^1\text{H}$  NMR spectrum of magnolin J (**11**) in  $\text{CDCl}_3$

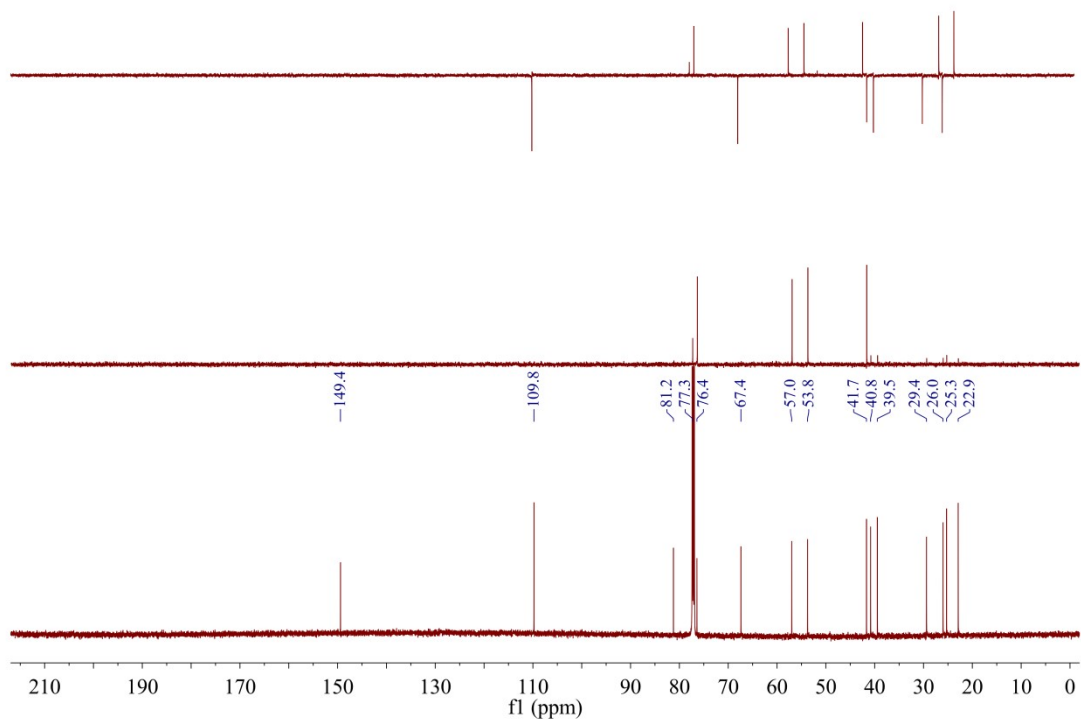

**Figure S83.**  $^{13}\text{C}$  NMR spectrum of magnolin J (**11**) in  $\text{CDCl}_3$

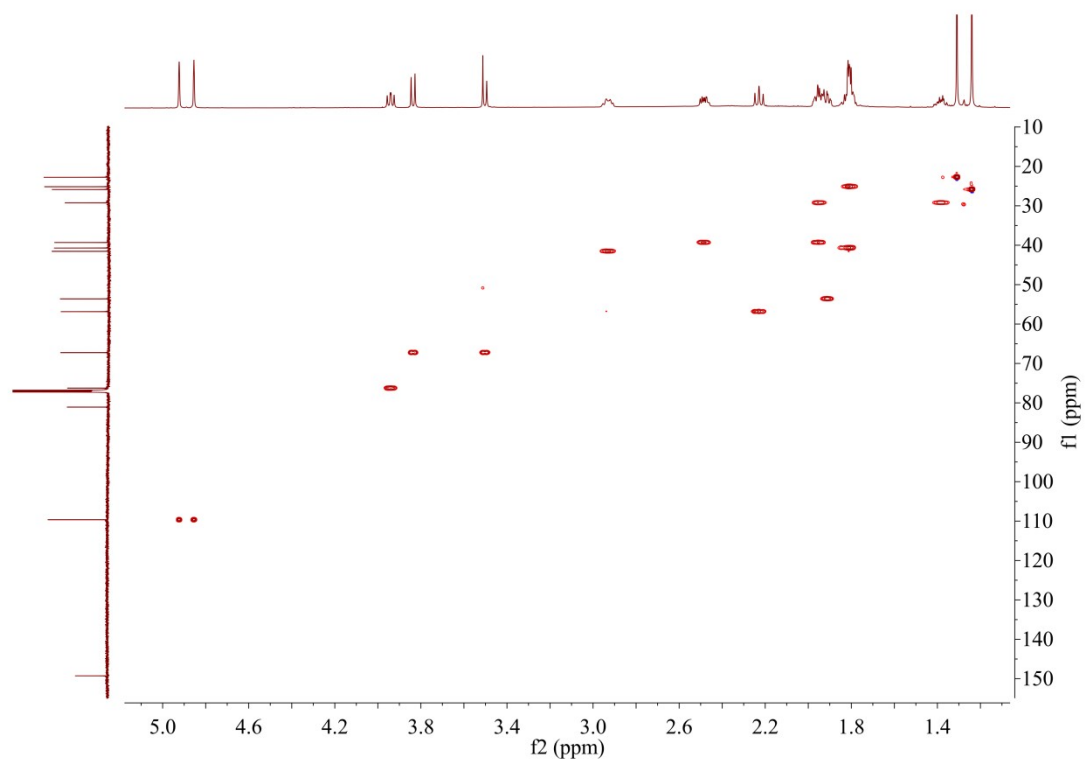

**Figure S84.** HSQC spectrum of magnolin J (**11**) in  $\text{CDCl}_3$

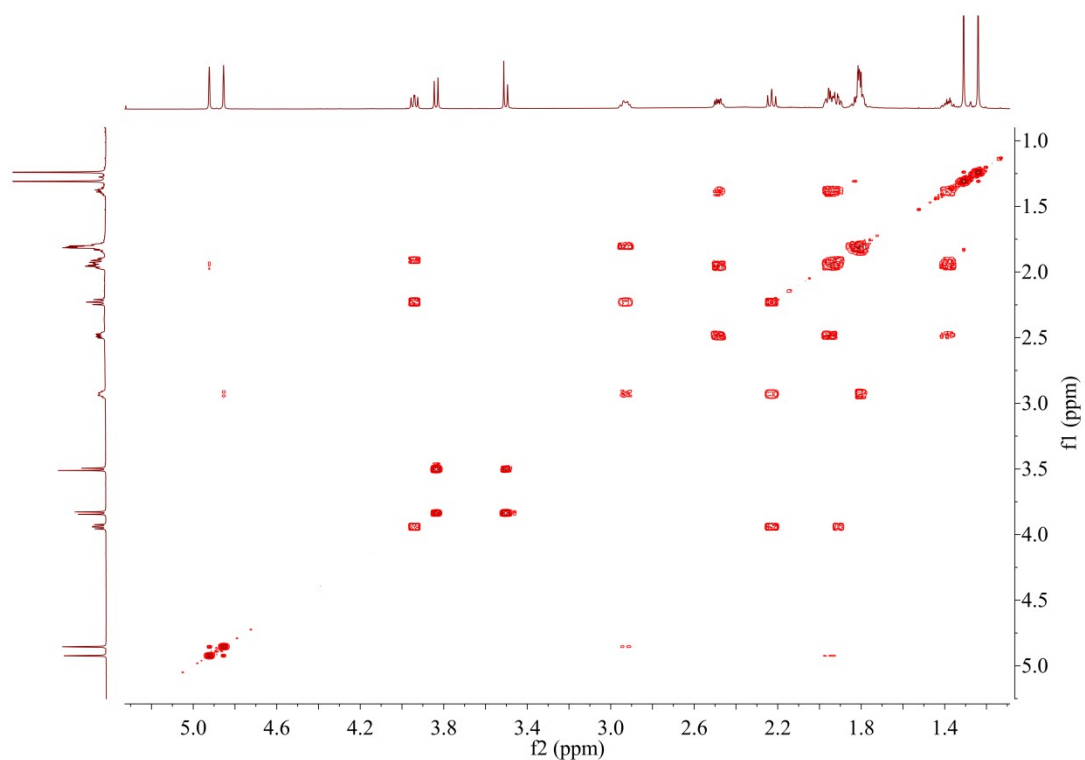

**Figure S85.** COSY spectrum of magnolin J (**11**) in  $\text{CDCl}_3$

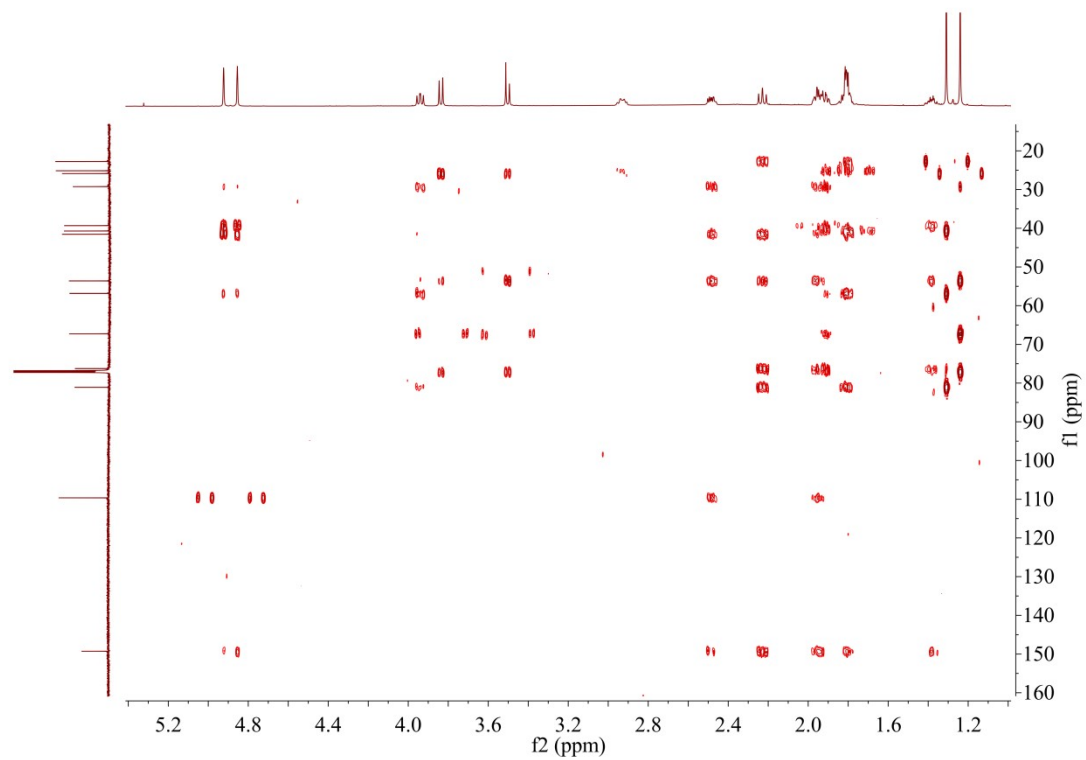

**Figure S86.** HMBC spectrum of magnolin J (**11**) in  $\text{CDCl}_3$

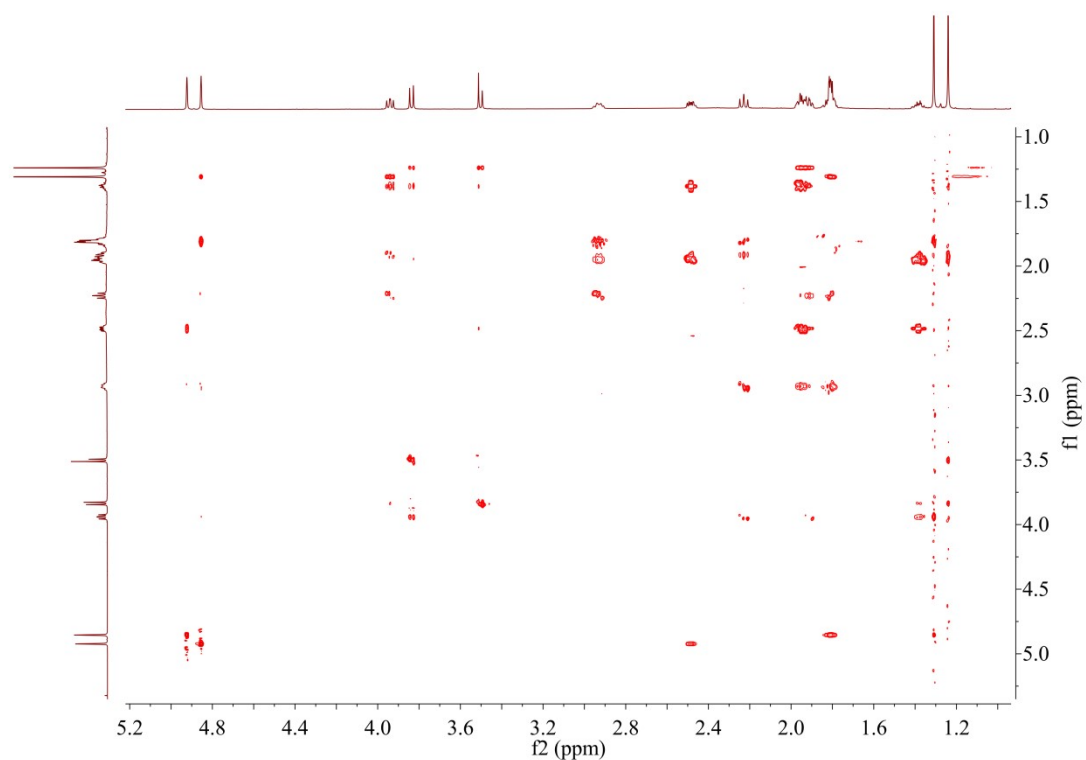

**Figure S87.** ROESY spectrum of magnolin J (**11**) in  $\text{CDCl}_3$

Data File: D:\DATA\2025\1104\fwxz-134.lcd

| Elmt | Val. | Min | Max | Elmt | Val. | Min | Max | Elmt | Val. | Min | Max | Use Adduct |
|------|------|-----|-----|------|------|-----|-----|------|------|-----|-----|------------|
| H    | 1    | 5   | 100 | N    | 3    | 0   | 10  | Si   | 4    | 0   | 0   | H          |
| B    | 3    | 0   | 0   | O    | 2    | 0   | 20  | S    | 2    | 0   | 0   | Na         |
| C    | 4    | 10  | 50  | F    | 1    | 0   | 0   | Cl   | 1    | 0   | 0   |            |

Error Margin (ppm): 5  
 DBE Range: -2.0 - 1000.0  
 Electron Ions: both  
 HC Ratio: unlimited  
 Apply N Rule: no  
 Use MSn Info: no  
 Max Isotopes: all  
 Isotope RI (%): 1.00  
 MSn Iso RI (%): 75.00  
 MSn Logic Mode: AND  
 Isotope Res: 10000  
 Max Results: 50

Event#: 1 MS(E+) Ret. Time : 0.587 -> 0.947 Scan#: 89 -> 143

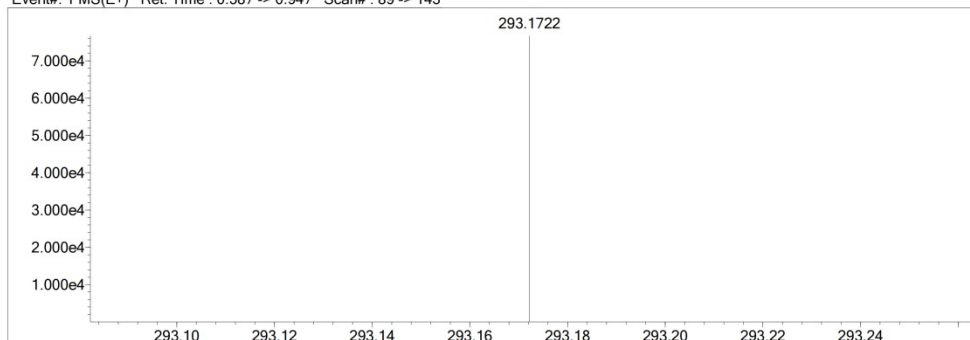

Measured region for 293.1722 m/z

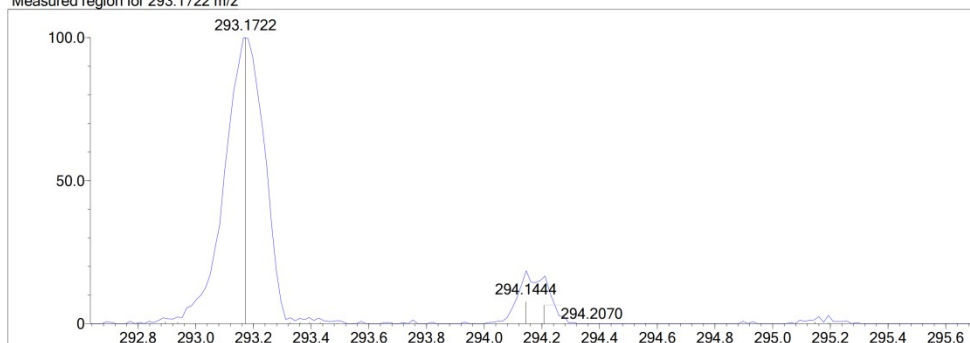

C15 H26 O4 [M+Na]+ : Predicted region for 293.1723 m/z

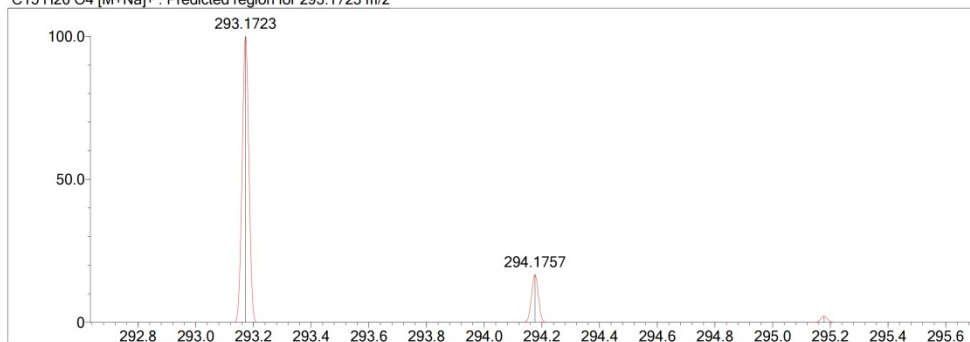

| Formula (M) | Ion     | Meas. m/z | Pred. m/z | Df. (mDa) | Df. (ppm) | DBE |
|-------------|---------|-----------|-----------|-----------|-----------|-----|
| C15 H26 O4  | [M+Na]+ | 293.1722  | 293.1723  | -0.1      | -0.34     | 3.0 |

**Figure S88.** HR-ESI-MS spectrum of magnolin J (11)

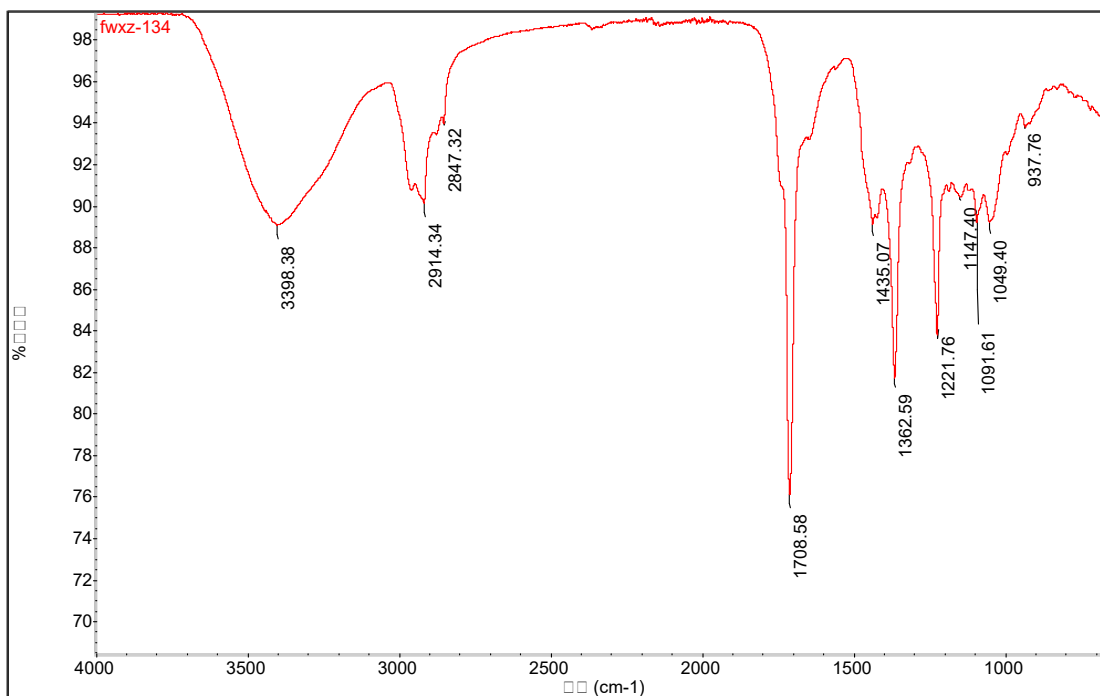

**Figure S89.** IR spectrum of magnolin J (**11**)

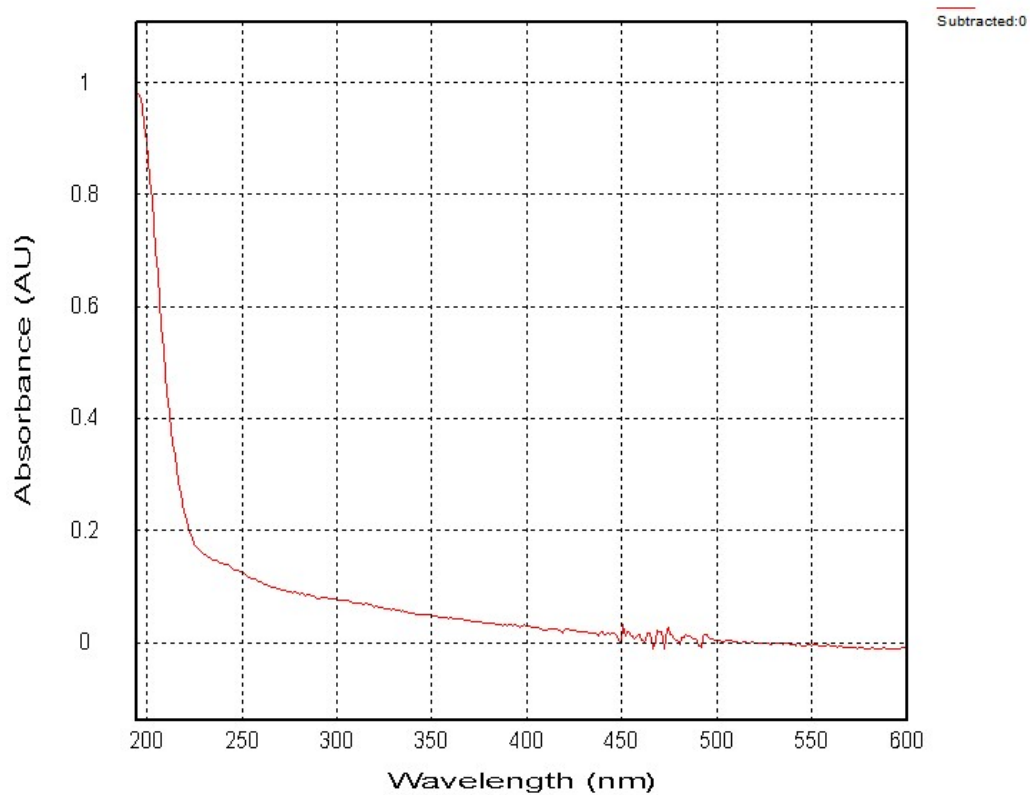

**Figure S90.** UV spectrum of magnolin J (**11**)

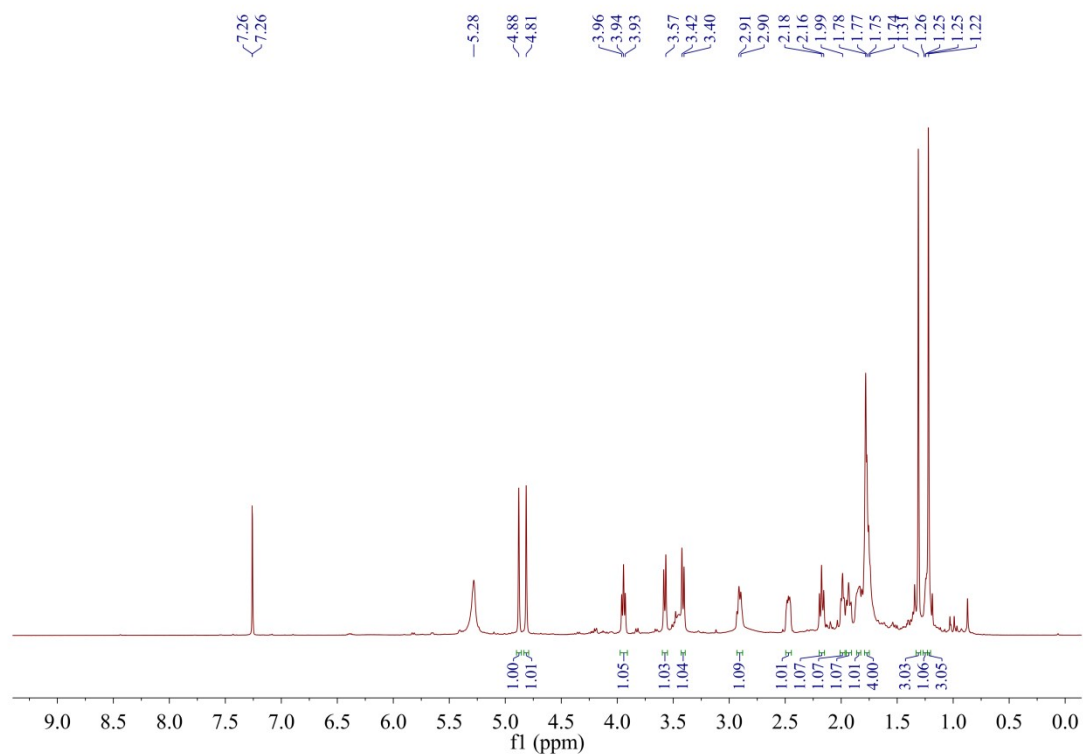

**Figure S91.**  $^1\text{H}$  NMR spectrum of magnolin K (12) in  $\text{CDCl}_3$

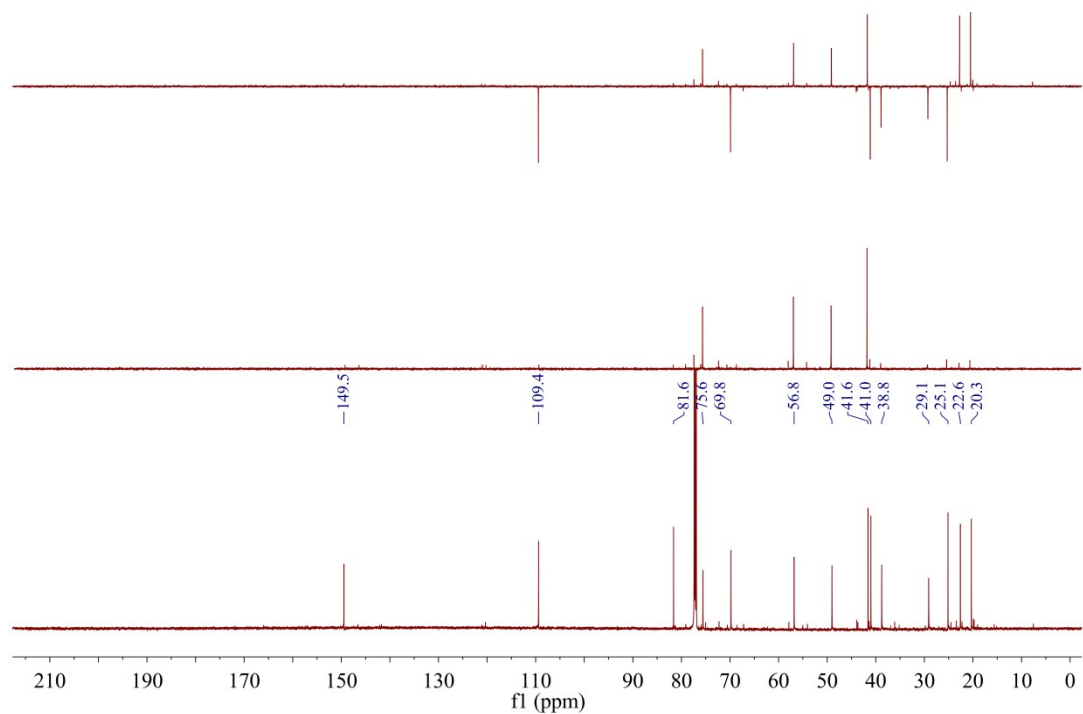

**Figure S92.**  $^{13}\text{C}$  NMR spectrum of magnolin K (12) in  $\text{CDCl}_3$

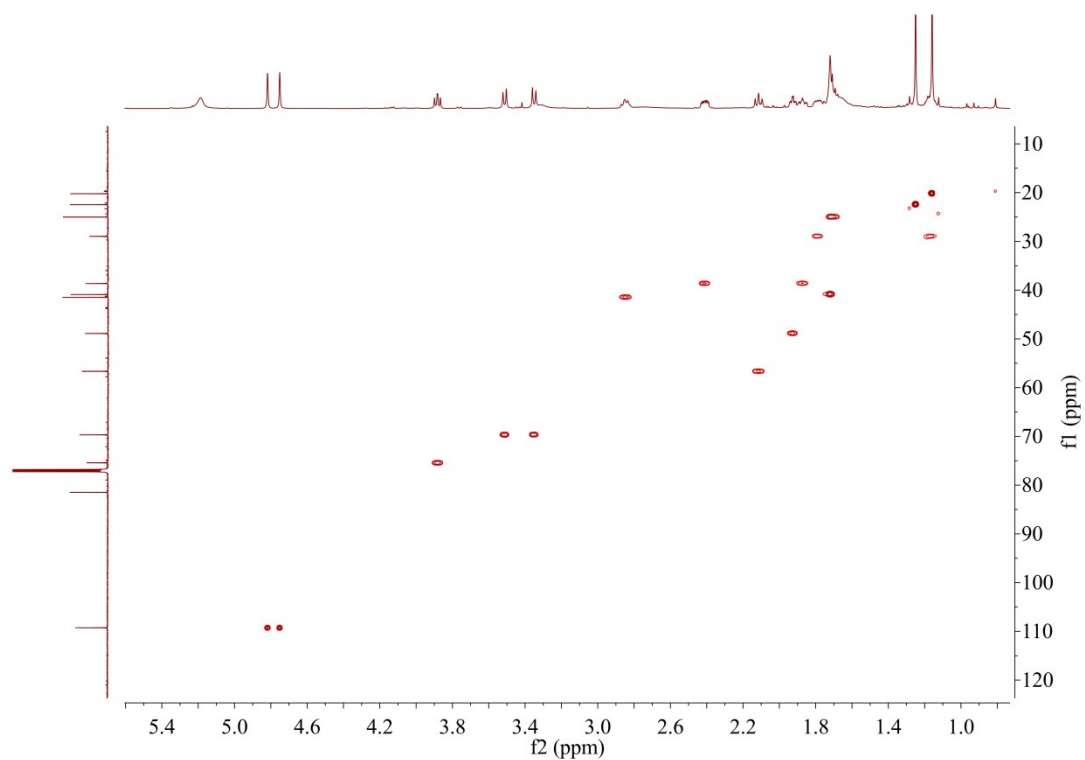

**Figure S93.** HSQC spectrum of magnolin K (**12**) in  $\text{CDCl}_3$

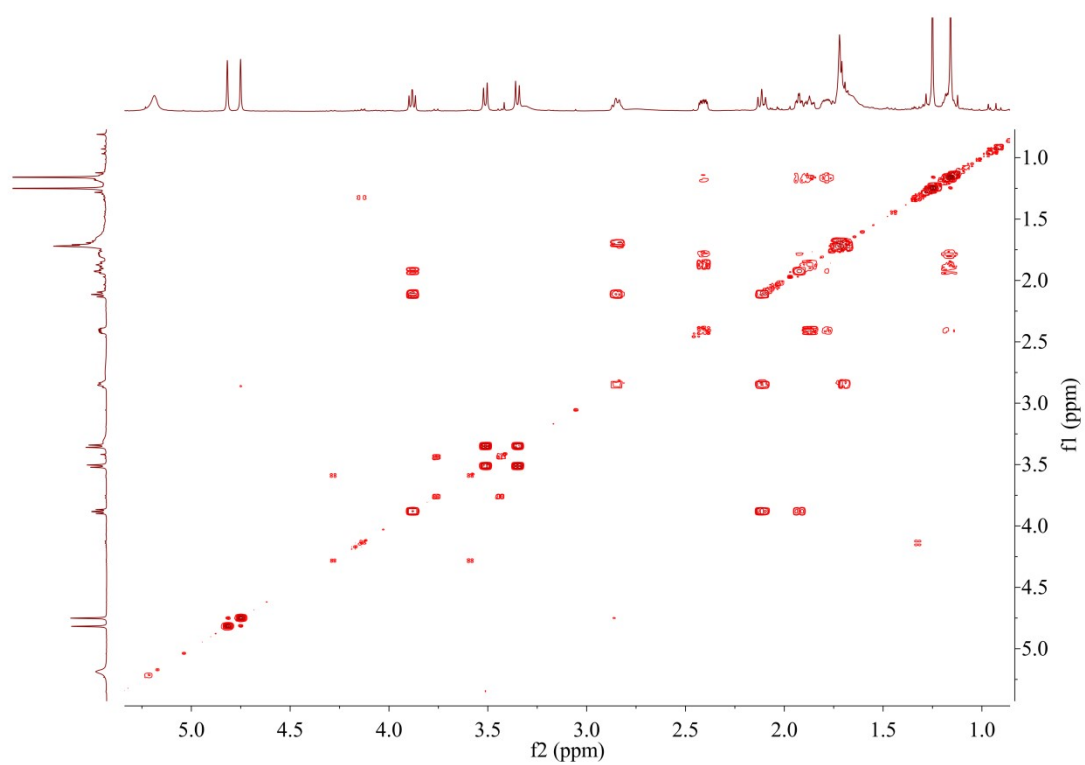

**Figure S94.** COSY spectrum of magnolin K (**12**) in  $\text{CDCl}_3$

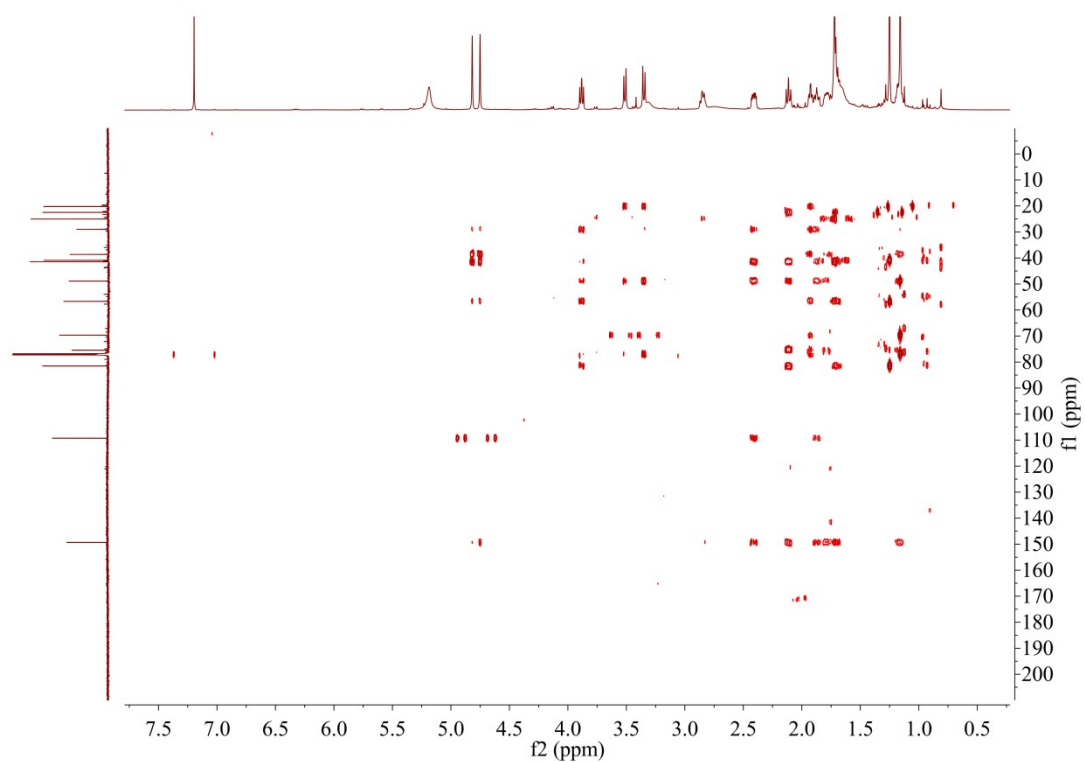

**Figure S95.** HMBC spectrum of magnolin K (12) in  $\text{CDCl}_3$

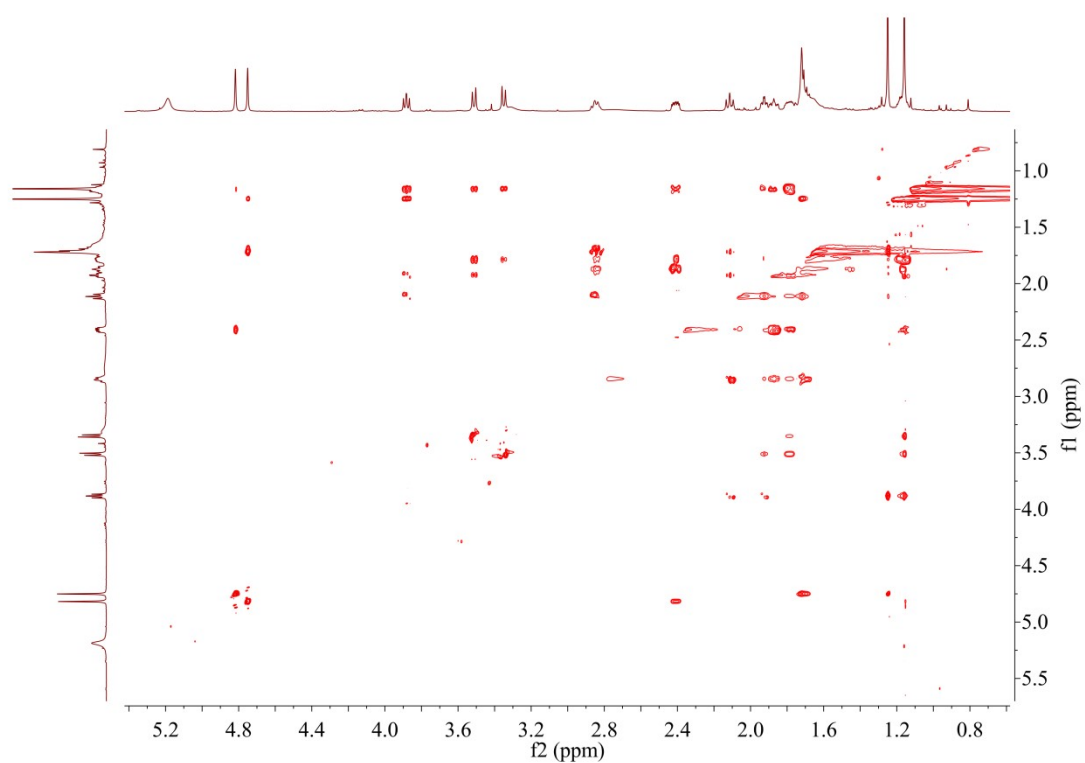

**Figure S96.** ROESY spectrum of magnolin K (12) in  $\text{CDCl}_3$

Data File: D:\DATA\2025\1104\fwxz-135.lcd

| Elmt | Val. | Min | Max | Elmt | Val. | Min | Max | Elmt | Val. | Min | Max | Use Adduct |
|------|------|-----|-----|------|------|-----|-----|------|------|-----|-----|------------|
| H    | 1    | 5   | 100 | N    | 3    | 0   | 10  | Si   | 4    | 0   | 0   | H          |
| B    | 3    | 0   | 0   | O    | 2    | 0   | 20  | S    | 2    | 0   | 0   | Na         |
| C    | 4    | 10  | 50  | F    | 1    | 0   | 0   | Cl   | 1    | 0   | 0   |            |

Error Margin (ppm): 5  
 HC Ratio: unlimited  
 Max Isotopes: all  
 MSn Iso RI (%): 75.00

DBE Range: -2.0 - 1000.0  
 Apply N Rule: no  
 Isotope RI (%): 1.00  
 MSn Logic Mode: AND

Electron Ions: both  
 Use MSn Info: no  
 Isotope Res: 10000  
 Max Results: 50

Event#: 1 MS(E+) Ret. Time : 0.320 -> 0.400 Scan#: 49 -> 61

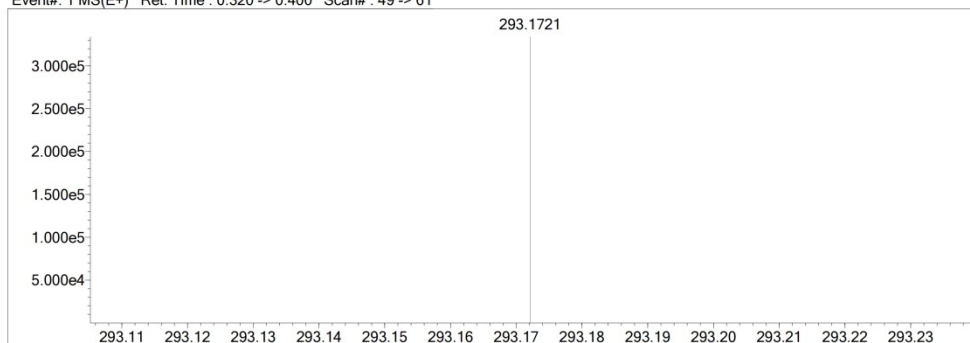

Measured region for 293.1721 m/z

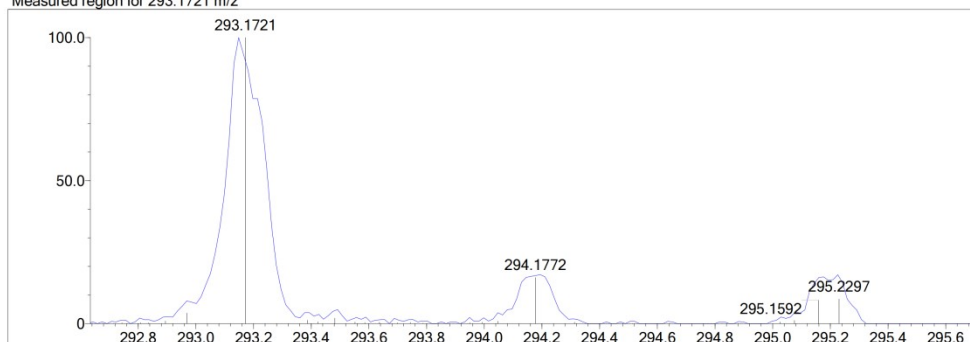

C15 H26 O4 [M+Na]+ : Predicted region for 293.1723 m/z

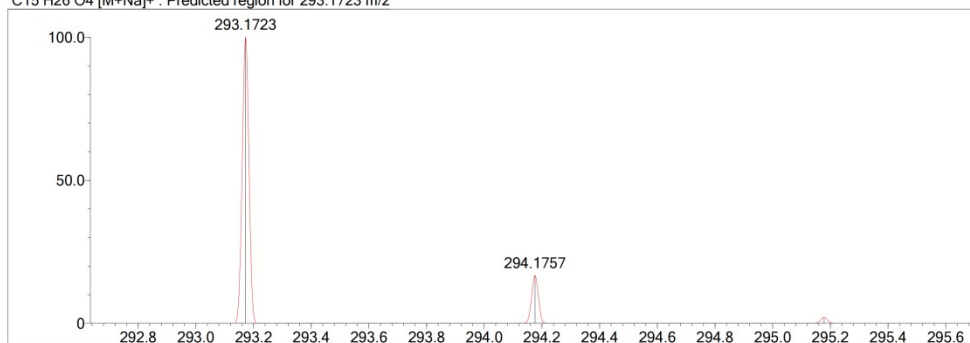

| Formula (M) | Ion     | Meas. m/z | Pred. m/z | Df. (mDa) | Df. (ppm) | DBE |
|-------------|---------|-----------|-----------|-----------|-----------|-----|
| C15 H26 O4  | [M+Na]+ | 293.1721  | 293.1723  | -0.2      | -0.68     | 3.0 |

Figure S97. HR-ESI-MS spectrum of magnolin K (12)

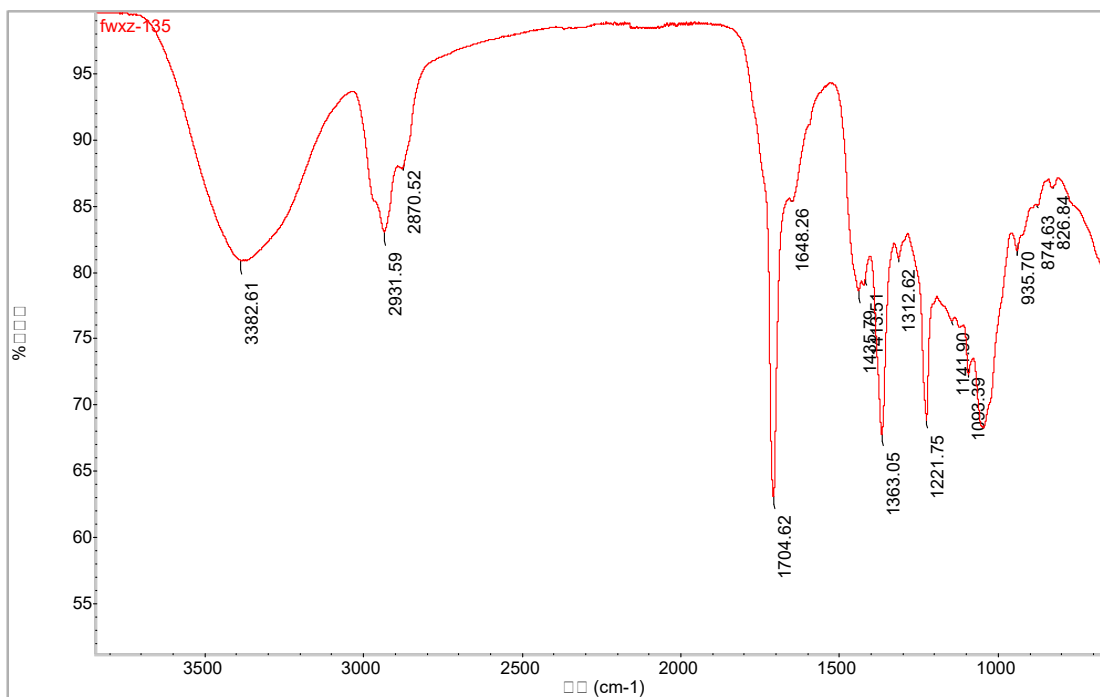

**Figure S98.** IR spectrum of magnolin K (12)

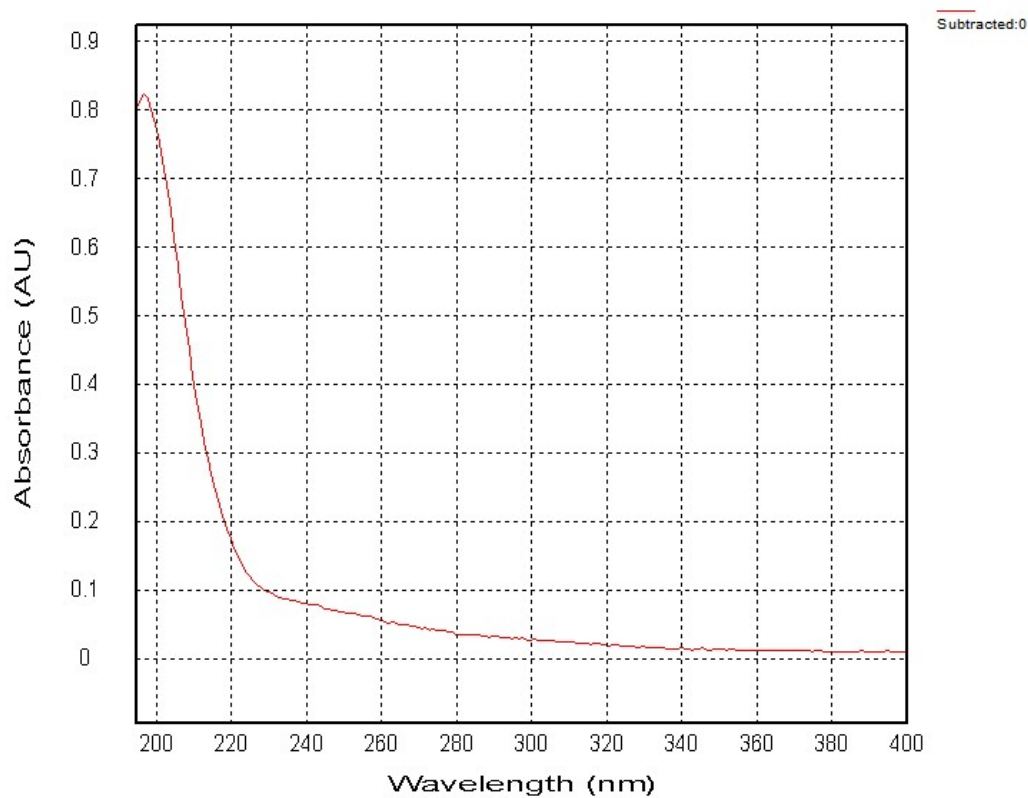

**Figure S99.** UV spectrum of magnolin K (12)

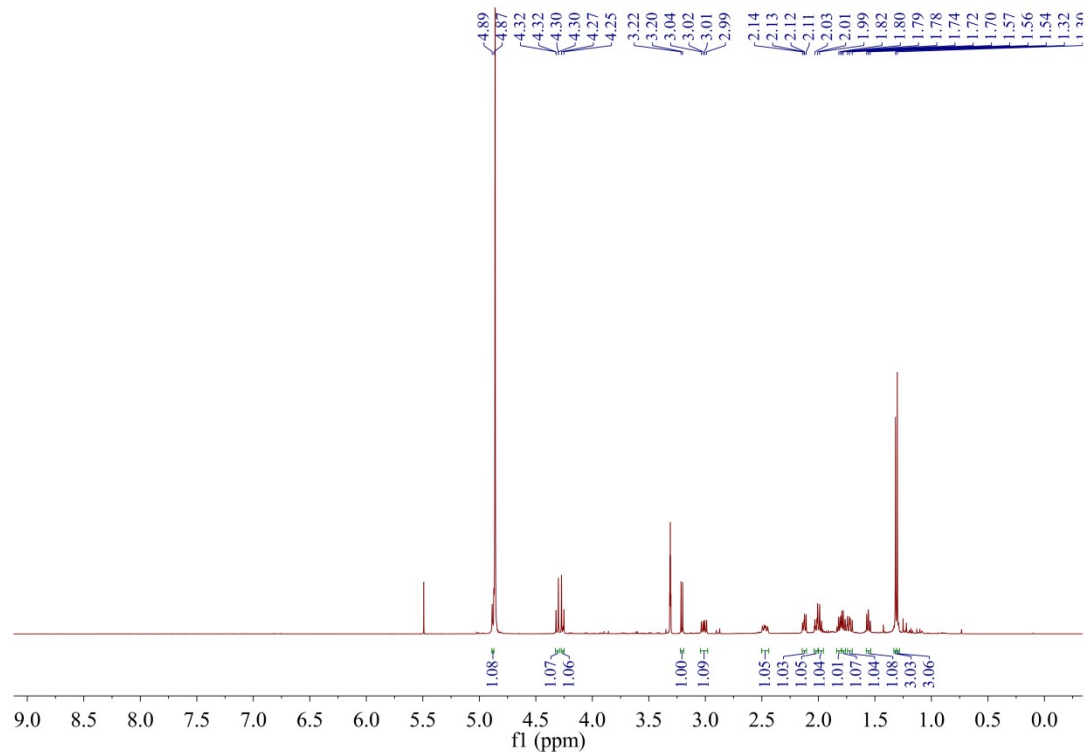

**Figure S10.**  $^1\text{H}$  NMR spectrum of magnolin L (**15**) in  $\text{CD}_3\text{OD}$

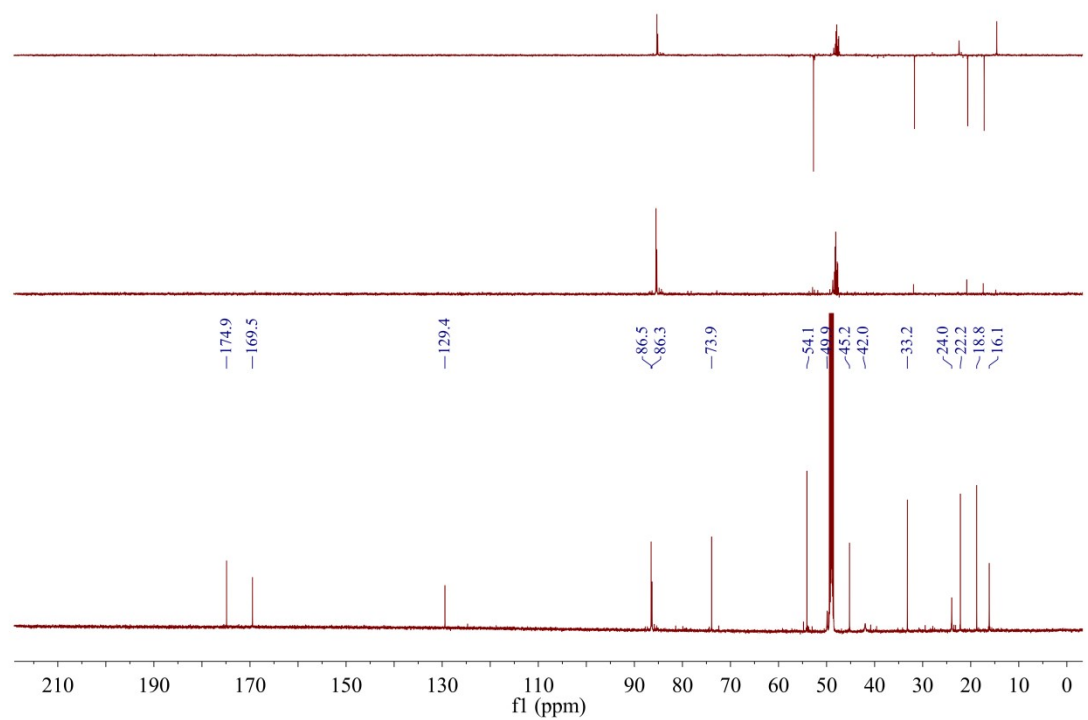

**Figure S101.**  $^{13}\text{C}$  NMR spectrum of magnolin L (**15**) in  $\text{CD}_3\text{OD}$

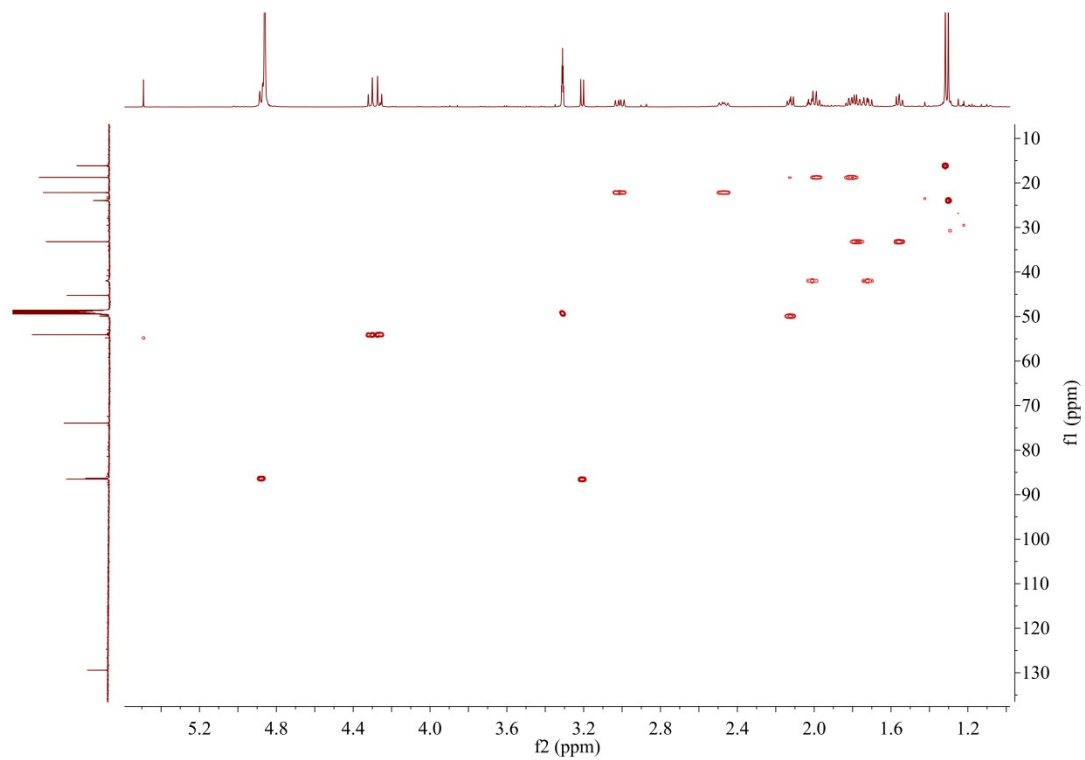

**Figure S102.** HSQC spectrum of magnolin L (**15**) in CD<sub>3</sub>OD

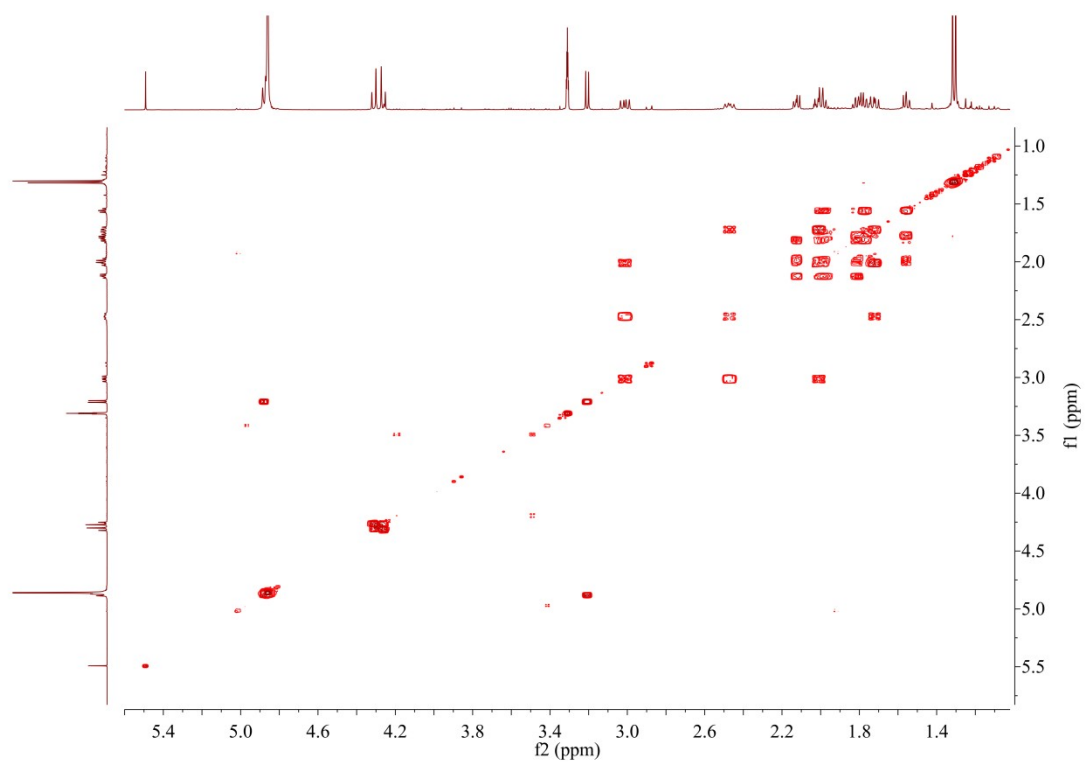

**Figure S103.** COSY spectrum of magnolin L (**15**) in CD<sub>3</sub>OD

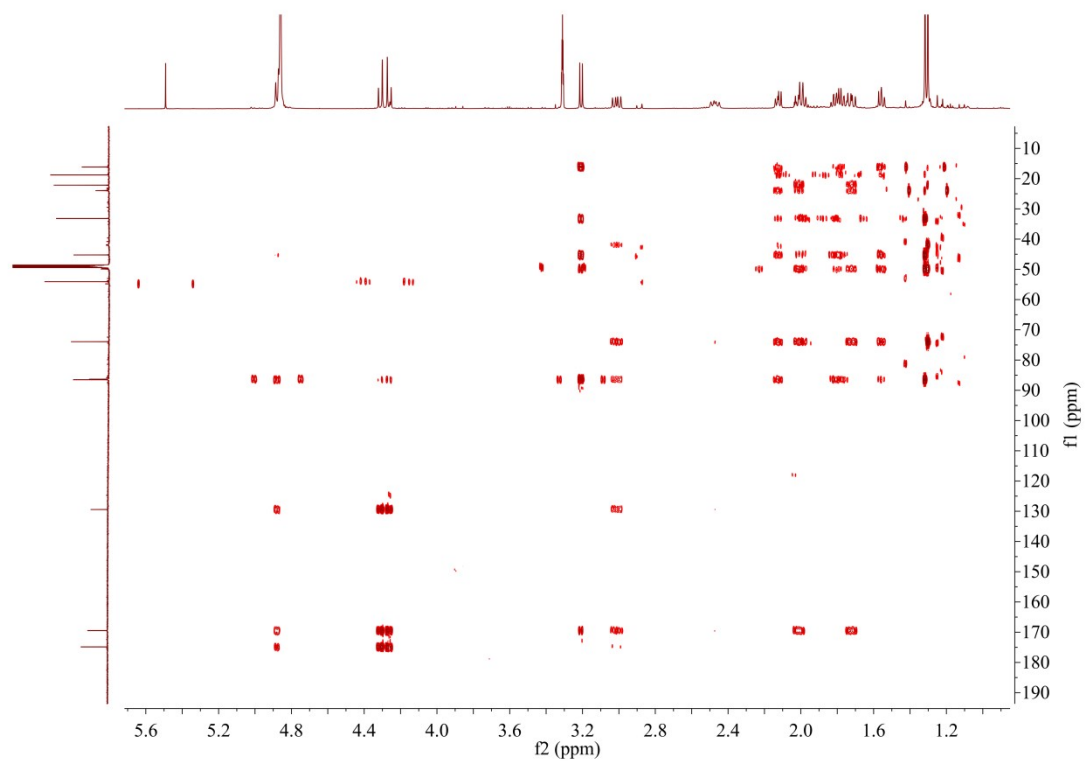

**Figure S104.** HMBC spectrum of magnolin L (**15**) in CD<sub>3</sub>OD

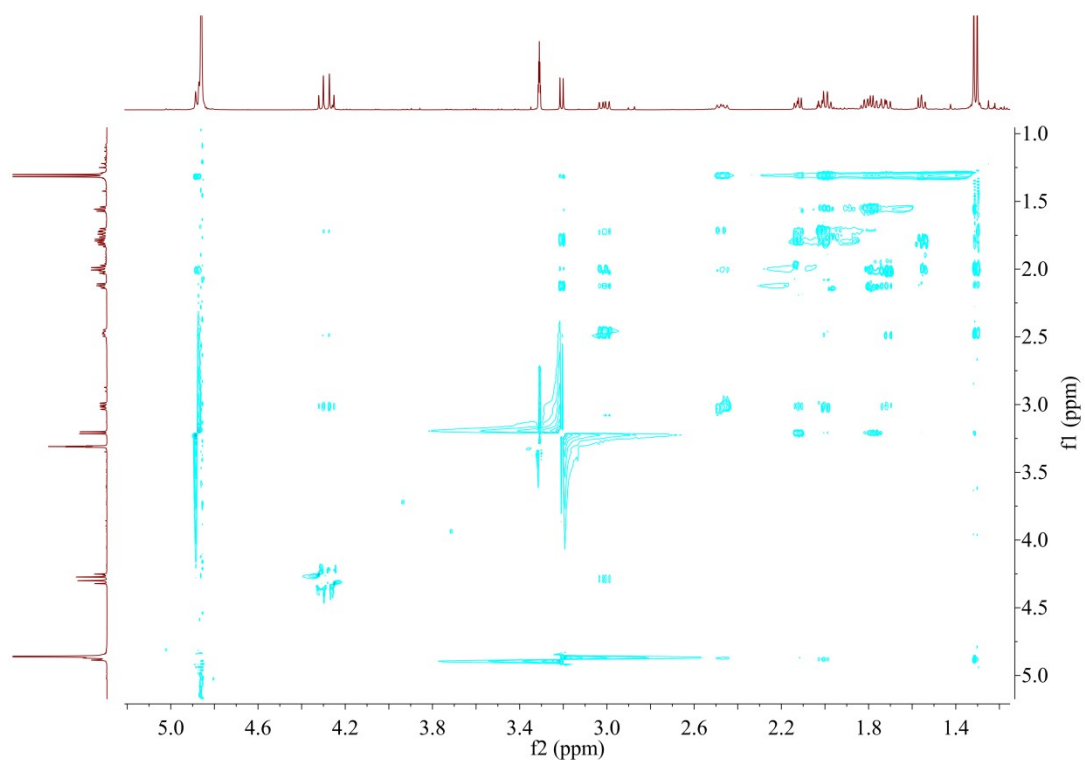

**Figure S105.** ROESY spectrum of magnolin L (**15**) in CD<sub>3</sub>OD

Data File: D:\DATA\2025\0312\1\Fwxz-76.lcd

| Elmt | Val. | Min | Max | Elmt | Val. | Min | Max | Elmt | Val. | Min | Max | Use Adduct |
|------|------|-----|-----|------|------|-----|-----|------|------|-----|-----|------------|
| H    | 1    | 10  | 100 | O    | 2    | 0   | 20  | S    | 2    | 0   | 5   | H          |
| C    | 4    | 5   | 100 | F    | 1    | 0   | 0   | Cl   | 1    | 0   | 5   | HCOO       |
| N    | 3    | 0   | 10  | Si   | 4    | 0   | 0   | Br   | 1    | 0   | 0   | Cl         |

Error Margin (ppm): 5  
 HC Ratio: unlimited  
 Max Isotopes: all  
 MSn Iso RI (%): 75.00

DBE Range: -2.0 - 1000.0  
 Apply N Rule: no  
 Isotope RI (%): 1.00  
 MSn Logic Mode: AND

Electron Ions: both  
 Use MSn Info: no  
 Isotope Res: 10000  
 Max Results: 50

Event#: 2 MS(E-) Ret. Time : 0.320 -> 0.613 Scan# : 50 -> 94

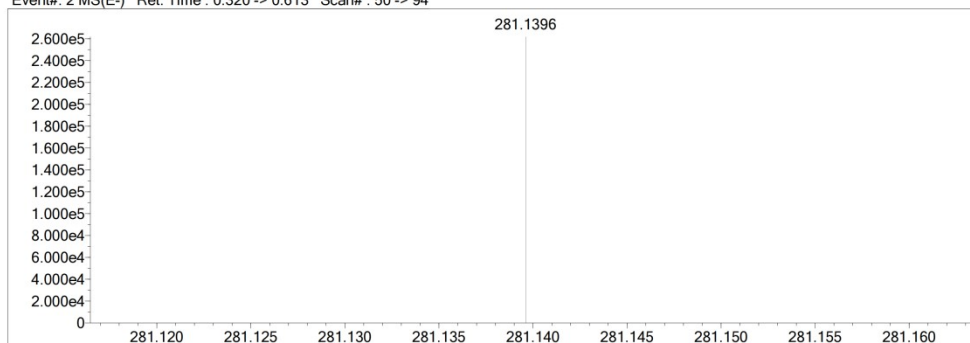

Measured region for 281.1396 m/z

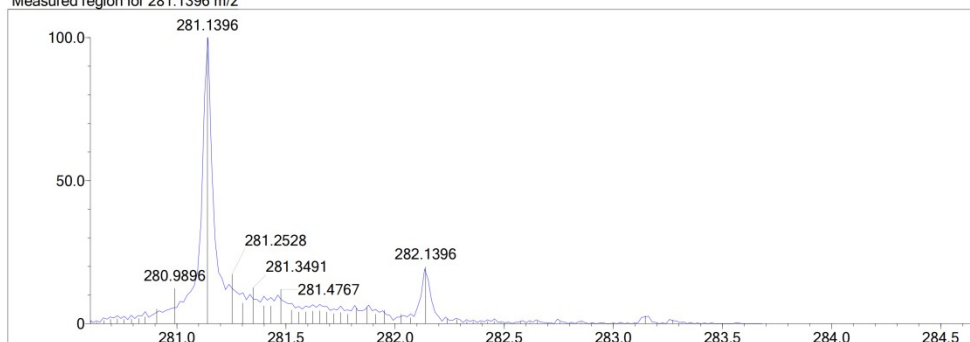

C15 H22 O5 [M-H]-: Predicted region for 281.1394 m/z

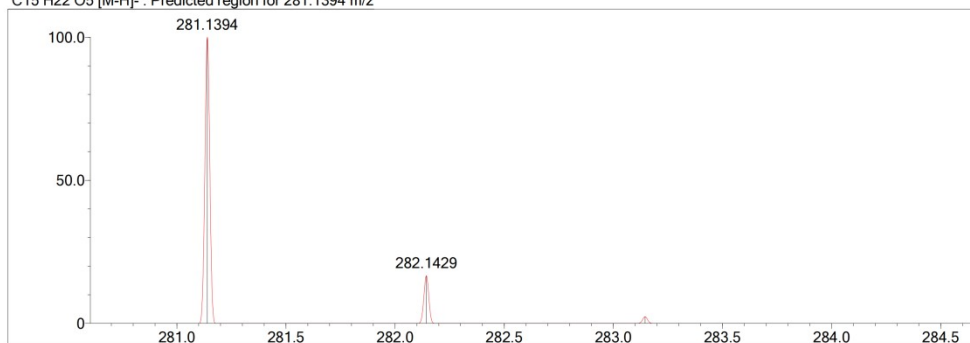

| Formula (M) | Ion    | Meas. m/z | Pred. m/z | Df. (mDa) | Df. (ppm) | DBE |
|-------------|--------|-----------|-----------|-----------|-----------|-----|
| C15 H22 O5  | [M-H]- | 281.1396  | 281.1394  | 0.2       | 0.71      | 5.0 |

Figure S106. HR-ESI-MS spectrum of magnolin L (15)

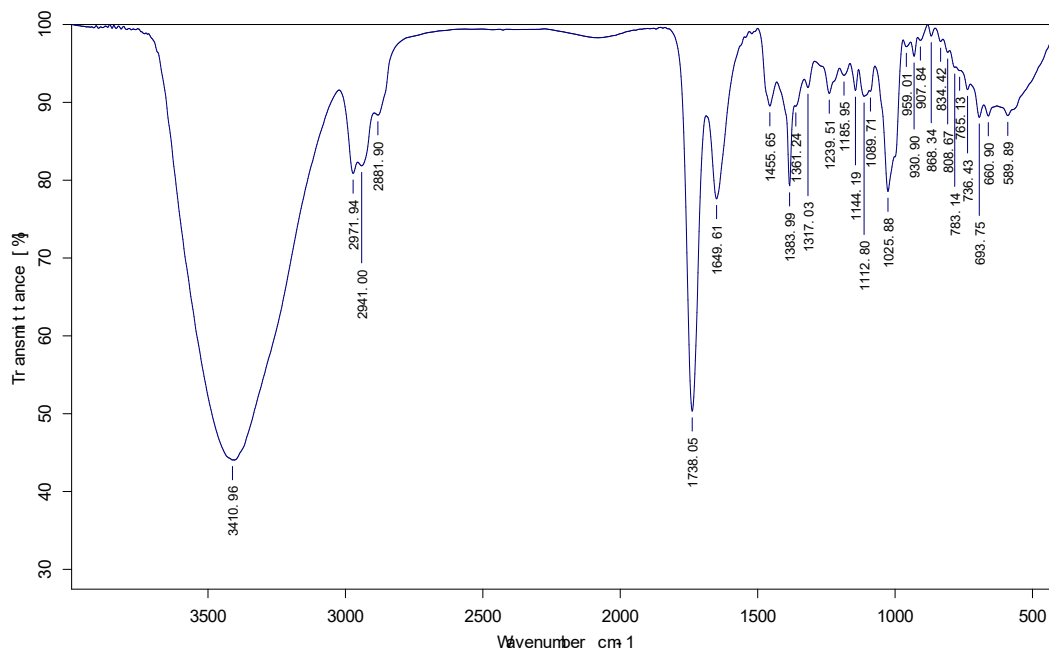

**Figure S107.** IR spectrum of magnolin L (15)

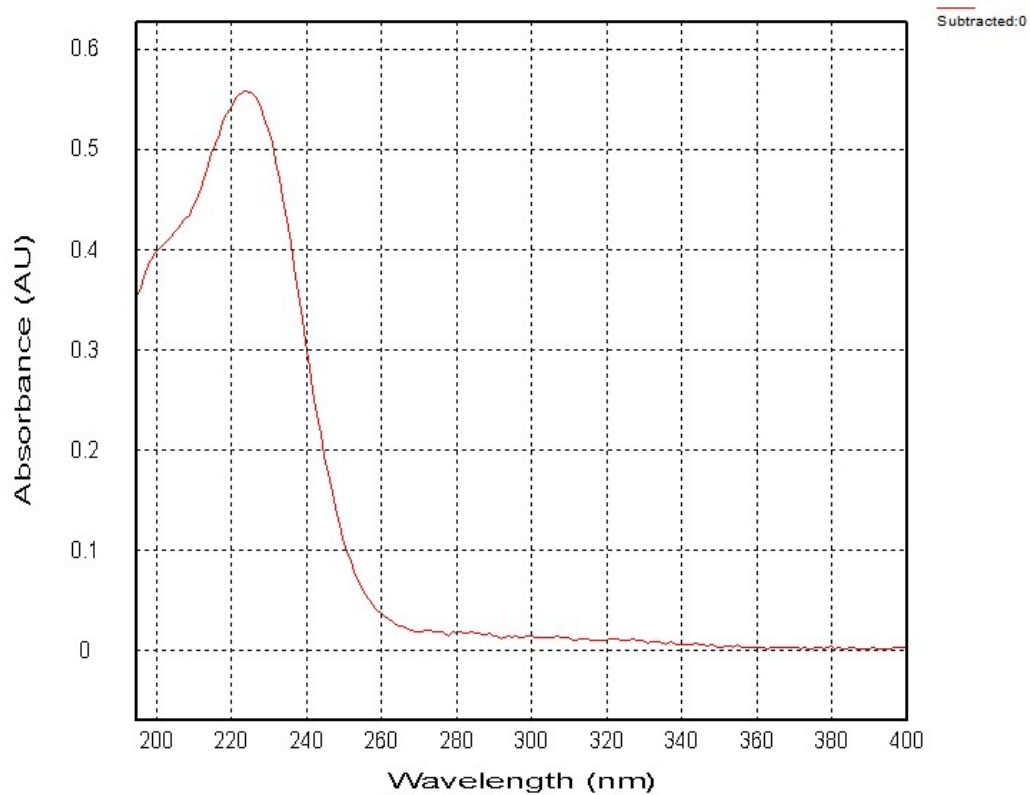

**Figure S108.** UV spectrum of magnolin L (15)

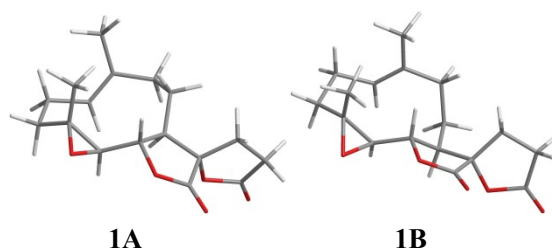

**Figure S109.** Conformers of isomer **1**

**Table S1.** Important thermodynamic parameters and Boltzmann distributions of the optimized isomer **1** at B3LYP/6-31G (d, p) level in gas phase.

| Conformations | Energy (a.u) | $\Delta G(\text{kcal/mol})$ | %     | Number of imaginary frequencies |
|---------------|--------------|-----------------------------|-------|---------------------------------|
| 1A            | -1036.722153 | 0.00                        | 100.0 | 0                               |
| 1B            | -1036.711861 | 6.46                        | 0.0   | 0                               |

**Table S2.** Optimized Z-matrixes of isomer **1** in the gas phase ( $\text{\AA}$ ) at B3LYP/6-31G (d) level.

| Center Number | Atomic Number | Atomic Type | Coordinates (Angstroms) |          |          |
|---------------|---------------|-------------|-------------------------|----------|----------|
|               |               |             | X                       | Y        | Z        |
| <b>1A</b>     |               |             |                         |          |          |
| 1             | 6             | 0           | 4.216437                | 0.457395 | 0.795873 |
| 2             | 6             | 0           | 3.912033                | 1.056771 | 0.734255 |
| 3             | 6             | 0           | 2.744564                | 1.336401 | 0.187364 |
| 4             | 6             | 0           | 1.406935                | 1.333607 | 0.427238 |
| 5             | 6             | 0           | 2.280929                | 2.017343 | 0.220119 |
| 6             | 6             | 0           | 2.941279                | 1.209164 | 1.054091 |
| 7             | 6             | 0           | 0.138183                | 0.958635 | 0.282689 |
| 8             | 6             | 0           | 0.577121                | 0.298757 | 0.261135 |
| 9             | 6             | 0           | 0.198319                | 1.688565 | 0.269387 |
| 10            | 6             | 0           | 0.871123                | 2.45187  | 0.539165 |
| 11            | 8             | 0           | 0.798393                | 2.05063  | 0.022302 |
| 12            | 6             | 0           | 2.028876                | 1.587655 | 0.199254 |
| 13            | 6             | 0           | 2.032988                | 0.079915 | 0.019413 |
| 14            | 8             | 0           | 2.033594                | 2.556621 | 0.050294 |
| 15            | 6             | 0           | 2.957763                | 1.005169 | 1.64316  |
| 16            | 8             | 0           | 2.963085                | 2.280107 | 0.488156 |
| 17            | 6             | 0           | 2.817228                | 2.55232  | 1.082804 |
| 18            | 8             | 0           | 2.931409                | 0.54716  | 0.888301 |
| 19            | 6             | 0           | 4.14786                 | 0.744985 | 0.314292 |
| 20            | 6             | 0           | 4.099904                | 0.31589  | 1.134268 |
| 21            | 6             | 0           | 2.60366                 | 0.212654 | 1.423286 |
| 22            | 8             | 0           | 5.06162                 | 1.194859 | 0.940509 |
| 23            | 1             | 0           | 4.686085                | 0.77506  | 0.136066 |
| 24            | 1             | 0           | 4.942034                | 0.630398 | 1.595093 |
| 25            | 1             | 0           | 3.662698                | 1.42738  | 1.732309 |

|           |   |   |          |          |          |
|-----------|---|---|----------|----------|----------|
| 26        | 1 | 0 | 4.794669 | 1.602068 | 0.388132 |
| 27        | 1 | 0 | 1.34995  | 1.197797 | 1.505906 |
| 28        | 1 | 0 | 2.445655 | 0.950452 | 1.990408 |
| 29        | 1 | 0 | 0.27109  | 0.905353 | 1.365    |
| 30        | 1 | 0 | 0.471864 | 0.288762 | 1.353901 |
| 31        | 1 | 0 | 1.110854 | 2.292163 | 0.237883 |
| 32        | 1 | 0 | 0.091115 | 1.624933 | 1.322961 |
| 33        | 1 | 0 | 0.758688 | 3.516278 | 0.310012 |
| 34        | 1 | 0 | 0.66547  | 2.327697 | 1.606124 |
| 35        | 1 | 0 | 3.908059 | 1.430646 | 1.975381 |
| 36        | 1 | 0 | 2.996468 | 0.07399  | 1.795098 |
| 37        | 1 | 0 | 2.164882 | 1.421251 | 2.2632   |
| 38        | 1 | 0 | 2.849216 | 3.645357 | 1.033443 |
| 39        | 1 | 0 | 3.820454 | 2.199736 | 1.316025 |
| 40        | 1 | 0 | 2.161396 | 2.298499 | 1.921094 |
| 41        | 1 | 0 | 4.603493 | 0.651114 | 1.205699 |
| 42        | 1 | 0 | 4.633593 | 1.030856 | 1.756402 |
| 43        | 1 | 0 | 2.216787 | 1.163887 | 1.787844 |
| 44        | 1 | 0 | 2.350508 | 0.564492 | 2.143765 |
| <b>1B</b> |   |   |          |          |          |
| 1         | 6 | 0 | 4.119369 | 0.688611 | 0.663264 |
| 2         | 6 | 0 | 3.983593 | 0.852724 | 0.821557 |
| 3         | 6 | 0 | 2.807659 | 1.32942  | 0.0001   |
| 4         | 6 | 0 | 1.493325 | 1.256531 | 0.651635 |
| 5         | 6 | 0 | 2.049901 | 1.959123 | 0.149708 |
| 6         | 6 | 0 | 2.764084 | 1.33624  | 0.792805 |
| 7         | 6 | 0 | 0.265715 | 0.76829  | 0.084751 |
| 8         | 6 | 0 | 0.635953 | 0.121204 | 0.790459 |
| 9         | 6 | 0 | 0.211115 | 1.569365 | 1.097955 |
| 10        | 6 | 0 | 0.585588 | 2.329204 | 0.030493 |
| 11        | 8 | 0 | 0.588176 | 1.877363 | 0.46693  |
| 12        | 6 | 0 | 1.874481 | 1.521281 | 0.392368 |
| 13        | 6 | 0 | 1.978473 | 0.070266 | 0.090972 |
| 14        | 8 | 0 | 2.099812 | 2.515162 | 0.388626 |
| 15        | 6 | 0 | 2.941213 | 1.19021  | 1.494403 |
| 16        | 8 | 0 | 2.782761 | 2.249673 | 0.672421 |
| 17        | 6 | 0 | 2.585508 | 2.378888 | 1.494748 |
| 18        | 8 | 0 | 3.070117 | 0.035437 | 1.004521 |
| 19        | 6 | 0 | 4.201757 | 0.431004 | 0.36367  |
| 20        | 6 | 0 | 3.88063  | 0.746529 | 1.079559 |
| 21        | 6 | 0 | 2.35735  | 0.859495 | 1.075045 |
| 22        | 8 | 0 | 5.248898 | 0.493231 | 0.937852 |
| 23        | 1 | 0 | 4.580443 | 0.914542 | 0.298686 |

|    |   |   |          |          |          |
|----|---|---|----------|----------|----------|
| 24 | 1 | 0 | 4.799888 | 1.0536   | 1.436911 |
| 25 | 1 | 0 | 3.808848 | 1.10731  | 1.87026  |
| 26 | 1 | 0 | 4.90953  | 1.340831 | 0.506649 |
| 27 | 1 | 0 | 1.477761 | 1.026636 | 1.71461  |
| 28 | 1 | 0 | 2.284141 | 1.138503 | 1.748155 |
| 29 | 1 | 0 | 0.547705 | 0.253898 | 1.008131 |
| 30 | 1 | 0 | 0.745302 | 0.405906 | 1.74591  |
| 31 | 1 | 0 | 0.339341 | 1.576446 | 2.039666 |
| 32 | 1 | 0 | 1.130208 | 2.125269 | 1.309823 |
| 33 | 1 | 0 | 0.105535 | 2.210284 | 0.947691 |
| 34 | 1 | 0 | 0.516944 | 3.401426 | 0.247429 |
| 35 | 1 | 0 | 3.811013 | 1.761586 | 1.828456 |
| 36 | 1 | 0 | 3.088453 | 0.149868 | 1.784974 |
| 37 | 1 | 0 | 2.060648 | 1.581323 | 2.005242 |
| 38 | 1 | 0 | 2.406264 | 3.449857 | 1.634848 |
| 39 | 1 | 0 | 3.653183 | 2.20116  | 1.612403 |
| 40 | 1 | 0 | 2.052985 | 1.867238 | 2.303385 |
| 41 | 1 | 0 | 4.233405 | 0.089931 | 1.687138 |
| 42 | 1 | 0 | 4.400884 | 1.648723 | 1.393255 |
| 43 | 1 | 0 | 2.060666 | 1.879287 | 0.826315 |
| 44 | 1 | 0 | 1.888269 | 0.57354  | 2.016041 |

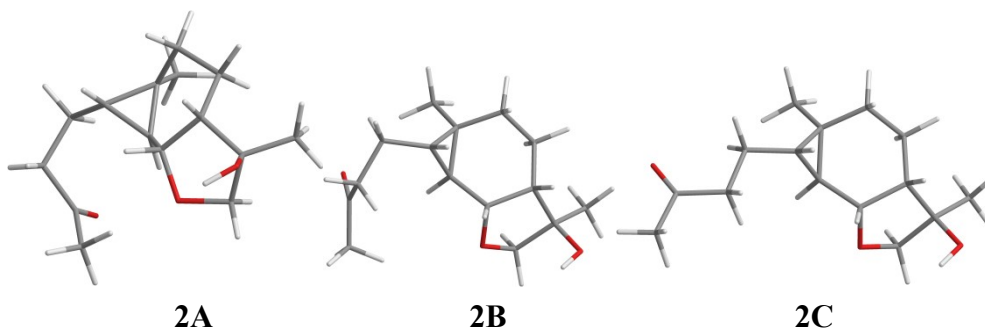

**Figure S110.** Conformers of isomer **2**

**Table S3.** Important thermodynamic parameters and Boltzmann distributions of the optimized isomer **2** at B3LYP/6-31G (d, p) level in gas phase.

| Conformations | Energy (a.u) | $\Delta G$ (kcal/mol) | %    | Number of imaginary frequencies |
|---------------|--------------|-----------------------|------|---------------------------------|
| 2A            | -811.265185  | 0.00                  | 31.1 | 0                               |
| 2B            | -811.265334  | -0.09                 | 36.4 | 0                               |
| 2C            | -811.265225  | -0.03                 | 32.5 | 0                               |

**Table S4.** Optimized Z-matrixes of isomer **2** in the gas phase (Å) at B3LYP/6-31G (d) level.

| Center | Atomic | Atomic | Coordinates (Angstroms) |   |   |
|--------|--------|--------|-------------------------|---|---|
| Number | Number | Type   | X                       | Y | Z |

| 2A |   |   |           |           |           |
|----|---|---|-----------|-----------|-----------|
| 1  | 6 | 0 | 0.400417  | 1.990276  | 0.025553  |
| 2  | 6 | 0 | 0.495287  | 0.573401  | 0.54314   |
| 3  | 6 | 0 | -0.603298 | -0.430377 | 0.321988  |
| 4  | 6 | 0 | -1.726477 | -0.000183 | -0.633426 |
| 5  | 6 | 0 | -2.048985 | 1.483213  | -0.449855 |
| 6  | 6 | 0 | -0.840689 | 2.355313  | -0.791907 |
| 7  | 6 | 0 | 1.363222  | 1.012209  | -0.605376 |
| 8  | 6 | 0 | 2.867233  | 1.098678  | -0.460248 |
| 9  | 6 | 0 | 3.538307  | -0.209647 | -0.873904 |
| 10 | 6 | 0 | 3.299915  | -1.355101 | 0.092187  |
| 11 | 6 | 0 | 3.357169  | -2.742377 | -0.491552 |
| 12 | 8 | 0 | 3.095251  | -1.165243 | 1.271772  |
| 13 | 6 | 0 | 0.929828  | 3.10743   | 0.899764  |
| 14 | 1 | 0 | 1.020688  | 0.437918  | 1.483343  |
| 15 | 8 | 0 | -1.273622 | -0.678797 | 1.570693  |
| 16 | 6 | 0 | -2.65407  | -0.961489 | 1.337095  |
| 17 | 6 | 0 | -2.859709 | -0.943467 | -0.183274 |
| 18 | 6 | 0 | -4.262095 | -0.543045 | -0.597183 |
| 19 | 8 | 0 | -2.658021 | -2.249629 | -0.736165 |
| 20 | 1 | 0 | -1.471875 | -0.204749 | -1.677524 |
| 21 | 1 | 0 | -0.149144 | -1.373775 | -0.018786 |
| 22 | 1 | 0 | -2.892408 | 1.761016  | -1.08597  |
| 23 | 1 | 0 | -2.347958 | 1.669042  | 0.588708  |
| 24 | 1 | 0 | -1.090363 | 3.403902  | -0.609864 |
| 25 | 1 | 0 | -0.628767 | 2.266761  | -1.862506 |
| 26 | 1 | 0 | 1.042144  | 0.658393  | -1.584827 |
| 27 | 1 | 0 | 3.255699  | 1.908588  | -1.084945 |
| 28 | 1 | 0 | 3.138804  | 1.325723  | 0.572572  |
| 29 | 1 | 0 | 3.220352  | -0.514643 | -1.875343 |
| 30 | 1 | 0 | 4.628036  | -0.09104  | -0.926342 |
| 31 | 1 | 0 | 2.471842  | -2.889279 | -1.117718 |
| 32 | 1 | 0 | 4.229361  | -2.844491 | -1.141231 |
| 33 | 1 | 0 | 3.377286  | -3.492599 | 0.296507  |
| 34 | 1 | 0 | 1.760332  | 2.779517  | 1.526483  |
| 35 | 1 | 0 | 1.272328  | 3.949062  | 0.289769  |
| 36 | 1 | 0 | 0.137499  | 3.473001  | 1.559495  |
| 37 | 1 | 0 | -3.260618 | -0.194471 | 1.827354  |
| 38 | 1 | 0 | -2.912894 | -1.939352 | 1.75152   |
| 39 | 1 | 0 | -4.333119 | -0.500765 | -1.686175 |

|           |   |   |           |           |           |
|-----------|---|---|-----------|-----------|-----------|
| 40        | 1 | 0 | -4.974935 | -1.285398 | -0.231765 |
| 41        | 1 | 0 | -4.534012 | 0.429252  | -0.187268 |
| 42        | 1 | 0 | -1.803472 | -2.59126  | -0.453908 |
| <b>2B</b> |   |   |           |           |           |
| 1         | 6 | 0 | 0.400417  | 1.990276  | 0.025553  |
| 2         | 6 | 0 | 0.495287  | 0.573401  | 0.54314   |
| 3         | 6 | 0 | -0.603298 | -0.430377 | 0.321988  |
| 4         | 6 | 0 | -1.726477 | -0.000183 | -0.633426 |
| 5         | 6 | 0 | -2.048985 | 1.483213  | -0.449855 |
| 6         | 6 | 0 | -0.840689 | 2.355313  | -0.791907 |
| 7         | 6 | 0 | 1.363222  | 1.012209  | -0.605376 |
| 8         | 6 | 0 | 2.867233  | 1.098678  | -0.460248 |
| 9         | 6 | 0 | 3.538307  | -0.209647 | -0.873904 |
| 10        | 6 | 0 | 3.299915  | -1.355101 | 0.092187  |
| 11        | 6 | 0 | 3.357169  | -2.742377 | -0.491552 |
| 12        | 8 | 0 | 3.095251  | -1.165243 | 1.271772  |
| 13        | 6 | 0 | 0.929828  | 3.10743   | 0.899764  |
| 14        | 1 | 0 | 1.020688  | 0.437918  | 1.483343  |
| 15        | 8 | 0 | -1.273622 | -0.678797 | 1.570693  |
| 16        | 6 | 0 | -2.65407  | -0.961489 | 1.337095  |
| 17        | 6 | 0 | -2.859709 | -0.943467 | -0.183274 |
| 18        | 6 | 0 | -4.262095 | -0.543045 | -0.597183 |
| 19        | 8 | 0 | -2.658021 | -2.249629 | -0.736165 |
| 20        | 1 | 0 | -1.471875 | -0.204749 | -1.677524 |
| 21        | 1 | 0 | -0.149144 | -1.373775 | -0.018786 |
| 22        | 1 | 0 | -2.892408 | 1.761016  | -1.08597  |
| 23        | 1 | 0 | -2.347958 | 1.669042  | 0.588708  |
| 24        | 1 | 0 | -1.090363 | 3.403902  | -0.609864 |
| 25        | 1 | 0 | -0.628767 | 2.266761  | -1.862506 |
| 26        | 1 | 0 | 1.042144  | 0.658393  | -1.584827 |
| 27        | 1 | 0 | 3.255699  | 1.908588  | -1.084945 |
| 28        | 1 | 0 | 3.138804  | 1.325723  | 0.572572  |
| 29        | 1 | 0 | 3.220352  | -0.514643 | -1.875343 |
| 30        | 1 | 0 | 4.628036  | -0.09104  | -0.926342 |
| 31        | 1 | 0 | 2.471842  | -2.889279 | -1.117718 |
| 32        | 1 | 0 | 4.229361  | -2.844491 | -1.141231 |
| 33        | 1 | 0 | 3.377286  | -3.492599 | 0.296507  |
| 34        | 1 | 0 | 1.760332  | 2.779517  | 1.526483  |
| 35        | 1 | 0 | 1.272328  | 3.949062  | 0.289769  |
| 36        | 1 | 0 | 0.137499  | 3.473001  | 1.559495  |

|           |   |   |           |           |           |
|-----------|---|---|-----------|-----------|-----------|
| 37        | 1 | 0 | -3.260618 | -0.194471 | 1.827354  |
| 38        | 1 | 0 | -2.912894 | -1.939352 | 1.75152   |
| 39        | 1 | 0 | -4.333119 | -0.500765 | -1.686175 |
| 40        | 1 | 0 | -4.974935 | -1.285398 | -0.231765 |
| 41        | 1 | 0 | -4.534012 | 0.429252  | -0.187268 |
| 42        | 1 | 0 | -1.803472 | -2.59126  | -0.453908 |
| <b>2C</b> |   |   |           |           |           |
| 1         | 6 | 0 | 0.400208  | 1.990168  | 0.025684  |
| 2         | 6 | 0 | 0.495261  | 0.573155  | 0.542826  |
| 3         | 6 | 0 | -0.603435 | -0.430525 | 0.32187   |
| 4         | 6 | 0 | -1.726711 | -0.000277 | -0.633358 |
| 5         | 6 | 0 | -2.049316 | 1.483072  | -0.449375 |
| 6         | 6 | 0 | -0.841142 | 2.355331  | -0.791418 |
| 7         | 6 | 0 | 1.362872  | 1.012335  | -0.605817 |
| 8         | 6 | 0 | 2.86689   | 1.098846  | -0.461036 |
| 9         | 6 | 0 | 3.538078  | -0.209528 | -0.874391 |
| 10        | 6 | 0 | 3.300632  | -1.354642 | 0.092287  |
| 11        | 6 | 0 | 3.358497  | -2.742177 | -0.490761 |
| 12        | 8 | 0 | 3.096309  | -1.164348 | 1.271872  |
| 13        | 6 | 0 | 0.92961   | 3.107203  | 0.900021  |
| 14        | 1 | 0 | 1.021016  | 0.437473  | 1.482802  |
| 15        | 8 | 0 | -1.273632 | -0.678666 | 1.570657  |
| 16        | 6 | 0 | -2.653914 | -0.962371 | 1.337052  |
| 17        | 6 | 0 | -2.85986  | -0.943685 | -0.183329 |
| 18        | 6 | 0 | -4.262344 | -0.543018 | -0.596703 |
| 19        | 8 | 0 | -2.658465 | -2.249625 | -0.736846 |
| 20        | 1 | 0 | -1.472206 | -0.204514 | -1.677542 |
| 21        | 1 | 0 | -0.149415 | -1.374022 | -0.018853 |
| 22        | 1 | 0 | -2.892856 | 1.760945  | -1.085301 |
| 23        | 1 | 0 | -2.348144 | 1.668604  | 0.589278  |
| 24        | 1 | 0 | -1.090835 | 3.403852  | -0.609012 |
| 25        | 1 | 0 | -0.629432 | 2.267111  | -1.862085 |
| 26        | 1 | 0 | 1.04156   | 0.658847  | -1.585303 |
| 27        | 1 | 0 | 3.255205  | 1.908525  | -1.086133 |
| 28        | 1 | 0 | 3.138698  | 1.326307  | 0.571629  |
| 29        | 1 | 0 | 3.219809  | -0.515022 | -1.875572 |
| 30        | 1 | 0 | 4.627754  | -0.090573 | -0.927342 |
| 31        | 1 | 0 | 2.472876  | -2.890034 | -1.116287 |
| 32        | 1 | 0 | 4.230351  | -2.844089 | -1.140918 |
| 33        | 1 | 0 | 3.379575  | -3.49194  | 0.297711  |

|    |   |   |           |           |           |
|----|---|---|-----------|-----------|-----------|
| 34 | 1 | 0 | 1.760542  | 2.779422  | 1.526248  |
| 35 | 1 | 0 | 1.271486  | 3.949166  | 0.290134  |
| 36 | 1 | 0 | 0.13745   | 3.47225   | 1.560246  |
| 37 | 1 | 0 | -3.260904 | -0.196111 | 1.827915  |
| 38 | 1 | 0 | -2.911906 | -1.940694 | 1.750903  |
| 39 | 1 | 0 | -4.333626 | -0.500171 | -1.685659 |
| 40 | 1 | 0 | -4.975078 | -1.285593 | -0.231524 |
| 41 | 1 | 0 | -4.534199 | 0.429046  | -0.186208 |
| 42 | 1 | 0 | -1.80338  | -2.590997 | -0.45591  |

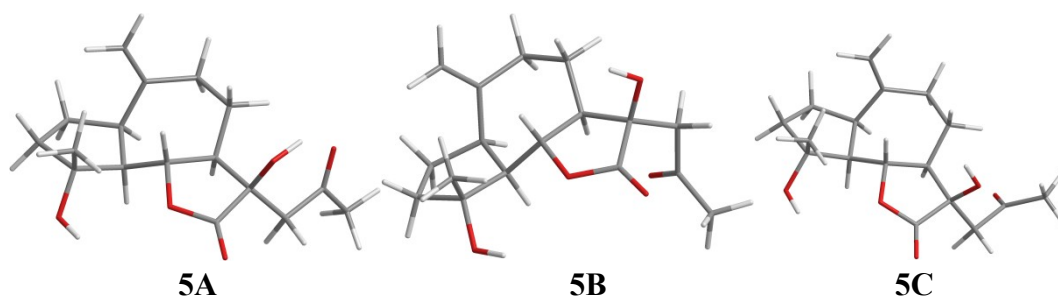

**Figure S111.** Conformers of isomer **5**

**Table S5.** Important thermodynamic parameters and Boltzmann distributions of the optimized isomer **5** at B3LYP/6-31G (d, p) level in gas phase.

| Conformations | Energy (a.u) | $\Delta G$ (kcal/mol) | %    | Number of imaginary frequencies |
|---------------|--------------|-----------------------|------|---------------------------------|
| 5A            | -1037.927818 | 0.00                  | 71.2 | 0                               |
| 5B            | -1037.926938 | 0.55                  | 28.1 | 0                               |
| 5C            | -1037.923465 | 2.73                  | 0.7  | 0                               |

**Table S6.** Optimized Z-matrixes of isomer **5** in the gas phase (Å) at B3LYP/6-31G (d) level.

| Center Number | Atomic Number | Atomic Type | Coordinates (Angstroms) |           |           |
|---------------|---------------|-------------|-------------------------|-----------|-----------|
|               |               |             | X                       | Y         | Z         |
| <b>5A</b>     |               |             |                         |           |           |
| 1             | 6             | 0           | 1.990095                | -1.191849 | -0.932876 |
| 2             | 6             | 0           | 1.660746                | 0.287951  | -0.614552 |
| 3             | 6             | 0           | 0.455316                | 0.491683  | 0.277141  |
| 4             | 6             | 0           | -0.805383               | -0.30076  | -0.090531 |
| 5             | 6             | 0           | -0.850498               | -1.647525 | 0.633505  |
| 6             | 6             | 0           | 0.223005                | -2.656143 | 0.189901  |
| 7             | 6             | 0           | 1.65061                 | -2.148209 | 0.196131  |
| 8             | 6             | 0           | 3.46566                 | -1.112648 | -1.361082 |
| 9             | 6             | 0           | 4.10479                 | -0.013288 | -0.502018 |
| 10            | 6             | 0           | 2.974876                | 0.957329  | -0.100029 |
| 11            | 8             | 0           | 0.087319                | 1.896821  | 0.18076   |

|           |   |   |           |           |           |
|-----------|---|---|-----------|-----------|-----------|
| 12        | 8 | 0 | 3.184915  | 2.18912   | -0.803825 |
| 13        | 6 | 0 | 3.006927  | 1.237174  | 1.400208  |
| 14        | 6 | 0 | -1.933401 | 0.683252  | 0.28922   |
| 15        | 6 | 0 | 2.527767  | -2.560372 | 1.111229  |
| 16        | 6 | 0 | -1.23757  | 2.049655  | 0.146808  |
| 17        | 8 | 0 | -1.77041  | 3.118557  | 0.049043  |
| 18        | 6 | 0 | -3.176283 | 0.647926  | -0.595715 |
| 19        | 6 | 0 | -4.097838 | -0.534445 | -0.370268 |
| 20        | 8 | 0 | -2.259659 | 0.63049   | 1.668545  |
| 21        | 6 | 0 | -5.022836 | -0.881184 | -1.499027 |
| 22        | 8 | 0 | -4.100052 | -1.150699 | 0.677802  |
| 23        | 1 | 0 | 1.381756  | -1.50114  | -1.787543 |
| 24        | 1 | 0 | 1.433445  | 0.773063  | -1.570269 |
| 25        | 1 | 0 | 0.696168  | 0.30522   | 1.326416  |
| 26        | 1 | 0 | -0.833163 | -0.445411 | -1.177444 |
| 27        | 1 | 0 | -1.827823 | -2.110982 | 0.485764  |
| 28        | 1 | 0 | -0.743883 | -1.461791 | 1.706229  |
| 29        | 1 | 0 | -0.01328  | -2.991807 | -0.826295 |
| 30        | 1 | 0 | 0.148802  | -3.529396 | 0.841567  |
| 31        | 1 | 0 | 3.974285  | -2.073752 | -1.271543 |
| 32        | 1 | 0 | 3.496593  | -0.81979  | -2.413646 |
| 33        | 1 | 0 | 4.885287  | 0.533085  | -1.033553 |
| 34        | 1 | 0 | 4.55968   | -0.433732 | 0.396794  |
| 35        | 1 | 0 | 2.435859  | 2.765999  | -0.612771 |
| 36        | 1 | 0 | 3.987283  | 1.643027  | 1.65858   |
| 37        | 1 | 0 | 2.244084  | 1.964681  | 1.690266  |
| 38        | 1 | 0 | 2.852674  | 0.317915  | 1.971297  |
| 39        | 1 | 0 | 3.561426  | -2.233511 | 1.111175  |
| 40        | 1 | 0 | 2.234044  | -3.256939 | 1.889651  |
| 41        | 1 | 0 | -3.774558 | 1.544599  | -0.388878 |
| 42        | 1 | 0 | -2.897879 | 0.700584  | -1.651107 |
| 43        | 1 | 0 | -2.855928 | -0.125642 | 1.780652  |
| 44        | 1 | 0 | -5.780054 | -1.588132 | -1.167284 |
| 45        | 1 | 0 | -5.48634  | 0.022862  | -1.899409 |
| 46        | 1 | 0 | -4.431289 | -1.324603 | -2.305516 |
| <b>5B</b> |   |   |           |           |           |
| 1         | 6 | 0 | 1.912951  | 0.79324   | 1.113657  |
| 2         | 6 | 0 | 1.29881   | -0.482159 | 0.479686  |
| 3         | 6 | 0 | 0.27853   | -0.202638 | -0.6013   |
| 4         | 6 | 0 | -0.776138 | 0.854462  | -0.248167 |
| 5         | 6 | 0 | -0.375527 | 2.247338  | -0.728874 |
| 6         | 6 | 0 | 0.812185  | 2.846931  | 0.043671  |
| 7         | 6 | 0 | 2.038733  | 1.959923  | 0.14739   |

|           |   |   |           |           |           |
|-----------|---|---|-----------|-----------|-----------|
| 8         | 6 | 0 | 3.216793  | 0.255459  | 1.729079  |
| 9         | 6 | 0 | 3.717401  | -0.847058 | 0.786073  |
| 10        | 6 | 0 | 2.481887  | -1.404807 | 0.049074  |
| 11        | 8 | 0 | -0.447291 | -1.434475 | -0.865222 |
| 12        | 8 | 0 | 2.246299  | -2.73406  | 0.533342  |
| 13        | 6 | 0 | 2.729238  | -1.46655  | -1.456114 |
| 14        | 6 | 0 | -2.063748 | 0.291723  | -0.87512  |
| 15        | 6 | 0 | 3.146654  | 2.235719  | -0.540682 |
| 16        | 6 | 0 | -1.758664 | -1.212426 | -1.011011 |
| 17        | 8 | 0 | -2.540574 | -2.080788 | -1.278596 |
| 18        | 6 | 0 | -3.325908 | 0.528145  | -0.066733 |
| 19        | 6 | 0 | -3.33246  | -0.150171 | 1.287717  |
| 20        | 8 | 0 | -2.344743 | 0.798889  | -2.172005 |
| 21        | 6 | 0 | -4.488258 | 0.178129  | 2.19029   |
| 22        | 8 | 0 | -2.448514 | -0.913325 | 1.614292  |
| 23        | 1 | 0 | 1.249444  | 1.130885  | 1.914641  |
| 24        | 1 | 0 | 0.773327  | -1.014657 | 1.280305  |
| 25        | 1 | 0 | 0.769115  | 0.07269   | -1.539225 |
| 26        | 1 | 0 | -0.911007 | 0.863682  | 0.836736  |
| 27        | 1 | 0 | -1.230132 | 2.923262  | -0.636852 |
| 28        | 1 | 0 | -0.115884 | 2.206861  | -1.791511 |
| 29        | 1 | 0 | 0.478587  | 3.08628   | 1.0598    |
| 30        | 1 | 0 | 1.088373  | 3.788524  | -0.435358 |
| 31        | 1 | 0 | 3.95311   | 1.04393   | 1.891995  |
| 32        | 1 | 0 | 2.976048  | -0.177536 | 2.703294  |
| 33        | 1 | 0 | 4.222552  | -1.654731 | 1.317664  |
| 34        | 1 | 0 | 4.425786  | -0.447667 | 0.057868  |
| 35        | 1 | 0 | 1.429856  | -3.051656 | 0.12977   |
| 36        | 1 | 0 | 3.609274  | -2.086203 | -1.640658 |
| 37        | 1 | 0 | 1.879214  | -1.9053   | -1.98542  |
| 38        | 1 | 0 | 2.919579  | -0.468959 | -1.860703 |
| 39        | 1 | 0 | 4.045505  | 1.63549   | -0.456595 |
| 40        | 1 | 0 | 3.189445  | 3.090766  | -1.207346 |
| 41        | 1 | 0 | -3.487909 | 1.603507  | 0.059071  |
| 42        | 1 | 0 | -4.184166 | 0.148742  | -0.632238 |
| 43        | 1 | 0 | -1.563488 | 0.738324  | -2.733218 |
| 44        | 1 | 0 | -4.394048 | 1.217763  | 2.51631   |
| 45        | 1 | 0 | -5.431696 | 0.092913  | 1.647607  |
| 46        | 1 | 0 | -4.487191 | -0.478404 | 3.057757  |
| <b>5C</b> |   |   |           |           |           |
| 1         | 6 | 0 | 1.990095  | -1.191849 | -0.932876 |
| 2         | 6 | 0 | 1.660746  | 0.287951  | -0.614552 |
| 3         | 6 | 0 | 0.455316  | 0.491683  | 0.277141  |

|    |   |   |           |           |           |
|----|---|---|-----------|-----------|-----------|
| 4  | 6 | 0 | -0.805383 | -0.30076  | -0.090531 |
| 5  | 6 | 0 | -0.850498 | -1.647525 | 0.633505  |
| 6  | 6 | 0 | 0.223005  | -2.656143 | 0.189901  |
| 7  | 6 | 0 | 1.65061   | -2.148209 | 0.196131  |
| 8  | 6 | 0 | 3.46566   | -1.112648 | -1.361082 |
| 9  | 6 | 0 | 4.10479   | -0.013288 | -0.502018 |
| 10 | 6 | 0 | 2.974876  | 0.957329  | -0.100029 |
| 11 | 8 | 0 | 0.087319  | 1.896821  | 0.18076   |
| 12 | 8 | 0 | 3.184915  | 2.18912   | -0.803825 |
| 13 | 6 | 0 | 3.006927  | 1.237174  | 1.400208  |
| 14 | 6 | 0 | -1.933401 | 0.683252  | 0.28922   |
| 15 | 6 | 0 | 2.527767  | -2.560372 | 1.111229  |
| 16 | 6 | 0 | -1.23757  | 2.049655  | 0.146808  |
| 17 | 8 | 0 | -1.77041  | 3.118557  | 0.049043  |
| 18 | 6 | 0 | -3.176283 | 0.647926  | -0.595715 |
| 19 | 6 | 0 | -4.097838 | -0.534445 | -0.370268 |
| 20 | 8 | 0 | -2.259659 | 0.63049   | 1.668545  |
| 21 | 6 | 0 | -5.022836 | -0.881184 | -1.499027 |
| 22 | 8 | 0 | -4.100052 | -1.150699 | 0.677802  |
| 23 | 1 | 0 | 1.381756  | -1.50114  | -1.787543 |
| 24 | 1 | 0 | 1.433445  | 0.773063  | -1.570269 |
| 25 | 1 | 0 | 0.696168  | 0.30522   | 1.326416  |
| 26 | 1 | 0 | -0.833163 | -0.445411 | -1.177444 |
| 27 | 1 | 0 | -1.827823 | -2.110982 | 0.485764  |
| 28 | 1 | 0 | -0.743883 | -1.461791 | 1.706229  |
| 29 | 1 | 0 | -0.01328  | -2.991807 | -0.826295 |
| 30 | 1 | 0 | 0.148802  | -3.529396 | 0.841567  |
| 31 | 1 | 0 | 3.974285  | -2.073752 | -1.271543 |
| 32 | 1 | 0 | 3.496593  | -0.81979  | -2.413646 |
| 33 | 1 | 0 | 4.885287  | 0.533085  | -1.033553 |
| 34 | 1 | 0 | 4.55968   | -0.433732 | 0.396794  |
| 35 | 1 | 0 | 2.435859  | 2.765999  | -0.612771 |
| 36 | 1 | 0 | 3.987283  | 1.643027  | 1.65858   |
| 37 | 1 | 0 | 2.244084  | 1.964681  | 1.690266  |
| 38 | 1 | 0 | 2.852674  | 0.317915  | 1.971297  |
| 39 | 1 | 0 | 3.561426  | -2.233511 | 1.111175  |
| 40 | 1 | 0 | 2.234044  | -3.256939 | 1.889651  |
| 41 | 1 | 0 | -3.774558 | 1.544599  | -0.388878 |
| 42 | 1 | 0 | -2.897879 | 0.700584  | -1.651107 |
| 43 | 1 | 0 | -2.855928 | -0.125642 | 1.780652  |
| 44 | 1 | 0 | -5.780054 | -1.588132 | -1.167284 |
| 45 | 1 | 0 | -5.48634  | 0.022862  | -1.899409 |
| 46 | 1 | 0 | -4.431289 | -1.324603 | -2.305516 |

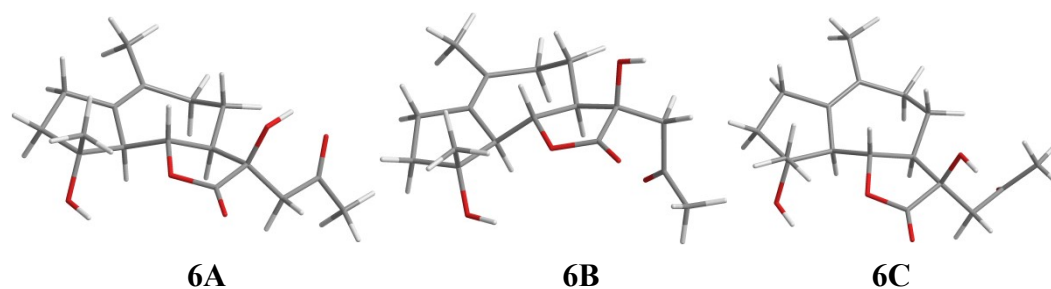

**Figure S112.** Conformers of isomer **6**

**Table S7.** Important thermodynamic parameters and Boltzmann distributions of the optimized isomer **6** at B3LYP/6-31G (d, p) level in gas phase.

| Conformations | Energy (a.u) | $\Delta G(\text{kcal/mol})$ | %    | Number of imaginary frequencies |
|---------------|--------------|-----------------------------|------|---------------------------------|
| 6A            | -1037.938653 | 0.00                        | 25.8 | 0                               |
| 6B            | -1037.939631 | -0.61                       | 72.8 | 0                               |
| 6C            | -1037.935918 | 1.72                        | 1.4  | 0                               |

**Table S8.** Optimized Z-matrixes of isomer **6** in the gas phase ( $\text{\AA}$ ) at B3LYP/6-31G (d) level.

| Center Number | Atomic Number | Atomic Type | Coordinates (Angstroms) |           |           |
|---------------|---------------|-------------|-------------------------|-----------|-----------|
|               |               |             | X                       | Y         | Z         |
| <b>6A</b>     |               |             |                         |           |           |
| 1             | 6             | 0           | -2.335838               | 1.136603  | -0.158632 |
| 2             | 6             | 0           | -1.723039               | -0.218588 | -0.496477 |
| 3             | 6             | 0           | -0.43187                | -0.510525 | 0.232576  |
| 4             | 6             | 0           | 0.803105                | 0.255488  | -0.223559 |
| 5             | 6             | 0           | 0.824182                | 1.695411  | 0.262442  |
| 6             | 6             | 0           | -0.244785               | 2.556811  | -0.421915 |
| 7             | 6             | 0           | -1.705519               | 2.314346  | -0.07716  |
| 8             | 6             | 0           | -3.843936               | 0.948977  | -0.003227 |
| 9             | 6             | 0           | -4.10551                | -0.451758 | -0.564323 |
| 10            | 6             | 0           | -2.854302               | -1.238353 | -0.183814 |
| 11            | 8             | 0           | -0.072278               | -1.909522 | 0.00571   |
| 12            | 8             | 0           | -2.766577               | -2.396219 | -1.005451 |
| 13            | 6             | 0           | -2.896508               | -1.647465 | 1.289578  |
| 14            | 6             | 0           | 1.923993                | -0.683732 | 0.252296  |
| 15            | 6             | 0           | -2.451044               | 3.577856  | 0.275119  |
| 16            | 6             | 0           | 1.258766                | -2.054349 | 0.01822   |
| 17            | 8             | 0           | 1.802398                | -3.112591 | -0.117226 |
| 18            | 6             | 0           | 3.246421                | -0.604262 | -0.50142  |
| 19            | 6             | 0           | 4.132901                | 0.571025  | -0.138996 |
| 20            | 8             | 0           | 2.101659                | -0.635274 | 1.659366  |
| 21            | 6             | 0           | 5.202968                | 0.922072  | -1.13023  |

|           |   |   |           |           |           |
|-----------|---|---|-----------|-----------|-----------|
| 22        | 8 | 0 | 3.99637   | 1.180494  | 0.904105  |
| 23        | 1 | 0 | -1.534823 | -0.286406 | -1.577523 |
| 24        | 1 | 0 | -0.564539 | -0.391147 | 1.3117    |
| 25        | 1 | 0 | 0.817016  | 0.243397  | -1.321706 |
| 26        | 1 | 0 | 1.798365  | 2.136052  | 0.041111  |
| 27        | 1 | 0 | 0.695988  | 1.724415  | 1.349124  |
| 28        | 1 | 0 | -0.124484 | 2.454287  | -1.50845  |
| 29        | 1 | 0 | -0.020251 | 3.601833  | -0.196469 |
| 30        | 1 | 0 | -4.406686 | 1.713417  | -0.539958 |
| 31        | 1 | 0 | -4.142385 | 1.007928  | 1.048662  |
| 32        | 1 | 0 | -5.016673 | -0.915253 | -0.182486 |
| 33        | 1 | 0 | -4.165143 | -0.416004 | -1.656128 |
| 34        | 1 | 0 | -1.932965 | -2.835029 | -0.798524 |
| 35        | 1 | 0 | -2.026079 | -2.250646 | 1.556177  |
| 36        | 1 | 0 | -2.92131  | -0.774686 | 1.946897  |
| 37        | 1 | 0 | -3.794733 | -2.241635 | 1.468387  |
| 38        | 1 | 0 | -2.419667 | 4.283811  | -0.561923 |
| 39        | 1 | 0 | -3.491904 | 3.402917  | 0.5407    |
| 40        | 1 | 0 | -1.961195 | 4.072308  | 1.119708  |
| 41        | 1 | 0 | 3.830736  | -1.506474 | -0.279195 |
| 42        | 1 | 0 | 3.074906  | -0.61008  | -1.580968 |
| 43        | 1 | 0 | 2.662777  | 0.135139  | 1.836544  |
| 44        | 1 | 0 | 4.727511  | 1.384085  | -2.000595 |
| 45        | 1 | 0 | 5.915563  | 1.616229  | -0.69024  |
| 46        | 1 | 0 | 5.707488  | 0.019094  | -1.479749 |
| <b>6B</b> |   |   |           |           |           |
| 1         | 6 | 0 | -2.423299 | 0.78289   | -0.291886 |
| 2         | 6 | 0 | -1.44183  | -0.373621 | -0.458473 |
| 3         | 6 | 0 | -0.285134 | -0.344976 | 0.511137  |
| 4         | 6 | 0 | 0.761755  | 0.732391  | 0.26454   |
| 5         | 6 | 0 | 0.336607  | 2.101233  | 0.764418  |
| 6         | 6 | 0 | -0.761807 | 2.713799  | -0.11167  |
| 7         | 6 | 0 | -2.145212 | 2.07887   | -0.098396 |
| 8         | 6 | 0 | -3.836738 | 0.223047  | -0.457777 |
| 9         | 6 | 0 | -3.623489 | -1.194609 | -0.996918 |
| 10        | 6 | 0 | -2.3238   | -1.646273 | -0.337726 |
| 11        | 8 | 0 | 0.460783  | -1.597032 | 0.406399  |
| 12        | 8 | 0 | -1.783189 | -2.736703 | -1.074407 |
| 13        | 6 | 0 | -2.563134 | -2.066161 | 1.113307  |
| 14        | 6 | 0 | 2.002353  | 0.113945  | 0.906377  |
| 15        | 6 | 0 | -3.250862 | 3.096266  | 0.048282  |
| 16        | 6 | 0 | 1.75705   | -1.387843 | 0.677211  |
| 17        | 8 | 0 | 2.5548    | -2.275381 | 0.790953  |

|           |   |   |           |           |           |
|-----------|---|---|-----------|-----------|-----------|
| 18        | 6 | 0 | 3.343048  | 0.574927  | 0.361741  |
| 19        | 6 | 0 | 3.580047  | 0.250144  | -1.100953 |
| 20        | 8 | 0 | 1.920297  | 0.336178  | 2.308751  |
| 21        | 6 | 0 | 4.797467  | 0.87049   | -1.727442 |
| 22        | 8 | 0 | 2.826934  | -0.470601 | -1.718819 |
| 23        | 1 | 0 | -1.035969 | -0.375367 | -1.480346 |
| 24        | 1 | 0 | -0.649368 | -0.284873 | 1.541004  |
| 25        | 1 | 0 | 0.944294  | 0.778719  | -0.813501 |
| 26        | 1 | 0 | 1.200872  | 2.772032  | 0.746311  |
| 27        | 1 | 0 | 0.002861  | 2.034533  | 1.803059  |
| 28        | 1 | 0 | -0.404678 | 2.735392  | -1.14979  |
| 29        | 1 | 0 | -0.877224 | 3.759506  | 0.182902  |
| 30        | 1 | 0 | -4.437516 | 0.828645  | -1.137169 |
| 31        | 1 | 0 | -4.363316 | 0.198024  | 0.501933  |
| 32        | 1 | 0 | -4.451766 | -1.873257 | -0.786357 |
| 33        | 1 | 0 | -3.463278 | -1.167765 | -2.078739 |
| 34        | 1 | 0 | -0.922293 | -2.945385 | -0.692515 |
| 35        | 1 | 0 | -1.642234 | -2.431245 | 1.573346  |
| 36        | 1 | 0 | -2.938222 | -1.233591 | 1.71397   |
| 37        | 1 | 0 | -3.301265 | -2.870212 | 1.135027  |
| 38        | 1 | 0 | -3.207766 | 3.823221  | -0.770088 |
| 39        | 1 | 0 | -4.245136 | 2.654454  | 0.06502   |
| 40        | 1 | 0 | -3.112174 | 3.661056  | 0.975402  |
| 41        | 1 | 0 | 3.458313  | 1.651142  | 0.52342   |
| 42        | 1 | 0 | 4.152133  | 0.092609  | 0.924851  |
| 43        | 1 | 0 | 2.644049  | -0.128721 | 2.745231  |
| 44        | 1 | 0 | 5.666269  | 0.749453  | -1.077722 |
| 45        | 1 | 0 | 4.985889  | 0.428501  | -2.703554 |
| 46        | 1 | 0 | 4.622393  | 1.944318  | -1.839325 |
| <b>6C</b> |   |   |           |           |           |
| 1         | 6 | 0 | -2.335838 | 1.136603  | -0.158632 |
| 2         | 6 | 0 | -1.723039 | -0.218588 | -0.496477 |
| 3         | 6 | 0 | -0.43187  | -0.510525 | 0.232576  |
| 4         | 6 | 0 | 0.803105  | 0.255488  | -0.223559 |
| 5         | 6 | 0 | 0.824182  | 1.695411  | 0.262442  |
| 6         | 6 | 0 | -0.244785 | 2.556811  | -0.421915 |
| 7         | 6 | 0 | -1.705519 | 2.314346  | -0.07716  |
| 8         | 6 | 0 | -3.843936 | 0.948977  | -0.003227 |
| 9         | 6 | 0 | -4.10551  | -0.451758 | -0.564323 |
| 10        | 6 | 0 | -2.854302 | -1.238353 | -0.183814 |
| 11        | 8 | 0 | -0.072278 | -1.909522 | 0.00571   |
| 12        | 8 | 0 | -2.766577 | -2.396219 | -1.005451 |
| 13        | 6 | 0 | -2.896508 | -1.647465 | 1.289578  |

|    |   |   |           |           |           |
|----|---|---|-----------|-----------|-----------|
| 14 | 6 | 0 | 1.923993  | -0.683732 | 0.252296  |
| 15 | 6 | 0 | -2.451044 | 3.577856  | 0.275119  |
| 16 | 6 | 0 | 1.258766  | -2.054349 | 0.01822   |
| 17 | 8 | 0 | 1.802398  | -3.112591 | -0.117226 |
| 18 | 6 | 0 | 3.246421  | -0.604262 | -0.50142  |
| 19 | 6 | 0 | 4.132901  | 0.571025  | -0.138996 |
| 20 | 8 | 0 | 2.101659  | -0.635274 | 1.659366  |
| 21 | 6 | 0 | 5.202968  | 0.922072  | -1.13023  |
| 22 | 8 | 0 | 3.99637   | 1.180494  | 0.904105  |
| 23 | 1 | 0 | -1.534823 | -0.286406 | -1.577523 |
| 24 | 1 | 0 | -0.564539 | -0.391147 | 1.3117    |
| 25 | 1 | 0 | 0.817016  | 0.243397  | -1.321706 |
| 26 | 1 | 0 | 1.798365  | 2.136052  | 0.041111  |
| 27 | 1 | 0 | 0.695988  | 1.724415  | 1.349124  |
| 28 | 1 | 0 | -0.124484 | 2.454287  | -1.50845  |
| 29 | 1 | 0 | -0.020251 | 3.601833  | -0.196469 |
| 30 | 1 | 0 | -4.406686 | 1.713417  | -0.539958 |
| 31 | 1 | 0 | -4.142385 | 1.007928  | 1.048662  |
| 32 | 1 | 0 | -5.016673 | -0.915253 | -0.182486 |
| 33 | 1 | 0 | -4.165143 | -0.416004 | -1.656128 |
| 34 | 1 | 0 | -1.932965 | -2.835029 | -0.798524 |
| 35 | 1 | 0 | -2.026079 | -2.250646 | 1.556177  |
| 36 | 1 | 0 | -2.92131  | -0.774686 | 1.946897  |
| 37 | 1 | 0 | -3.794733 | -2.241635 | 1.468387  |
| 38 | 1 | 0 | -2.419667 | 4.283811  | -0.561923 |
| 39 | 1 | 0 | -3.491904 | 3.402917  | 0.5407    |
| 40 | 1 | 0 | -1.961195 | 4.072308  | 1.119708  |
| 41 | 1 | 0 | 3.830736  | -1.506474 | -0.279195 |
| 42 | 1 | 0 | 3.074906  | -0.61008  | -1.580968 |
| 43 | 1 | 0 | 2.662777  | 0.135139  | 1.836544  |
| 44 | 1 | 0 | 4.727511  | 1.384085  | -2.000595 |
| 45 | 1 | 0 | 5.915563  | 1.616229  | -0.69024  |
| 46 | 1 | 0 | 5.707488  | 0.019094  | -1.479749 |

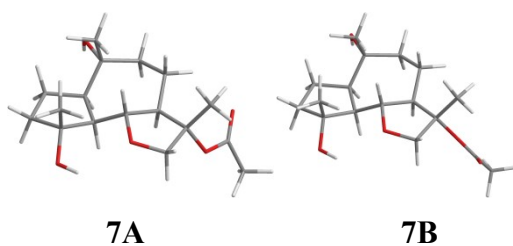

**Figure S113.** Conformers of isomer 7

**Table S9.** Important thermodynamic parameters and Boltzmann distributions of the optimized isomer **7** at B3LYP/6-31G (d, p) level in gas phase.

| Conformations | Energy (a.u) | $\Delta G(\text{kcal/mol})$ | %    | Number of imaginary frequencies |
|---------------|--------------|-----------------------------|------|---------------------------------|
| 7A            | -1040.302256 | 0.00                        | 30.9 | 0                               |
| 7B            | -1040.303017 | -0.48                       | 69.1 | 0                               |

**Table S10.** Optimized Z-matrixes of isomer **7** in the gas phase ( $\text{\AA}$ ) at B3LYP/6-31G (d) level.

| Center Number | Atomic Number | Atomic Type | Coordinates(Angstroms) |           |           |
|---------------|---------------|-------------|------------------------|-----------|-----------|
|               |               |             | X                      | Y         | Z         |
| <b>7A</b>     |               |             |                        |           |           |
| 1             | 6             | 0           | -1.987903              | 0.672947  | -0.849393 |
| 2             | 6             | 0           | -1.223103              | -0.652824 | -0.530174 |
| 3             | 6             | 0           | -0.126539              | -0.626828 | 0.510767  |
| 4             | 6             | 0           | 1.023352               | 0.346356  | 0.226871  |
| 5             | 6             | 0           | 0.746755               | 1.755411  | 0.735908  |
| 6             | 6             | 0           | -0.350716              | 2.484162  | -0.0455   |
| 7             | 6             | 0           | -1.791547              | 1.939315  | 0.022473  |
| 8             | 6             | 0           | -3.472047              | 0.244454  | -0.993975 |
| 9             | 6             | 0           | -3.431499              | -1.27125  | -1.199308 |
| 10            | 6             | 0           | -2.304342              | -1.732718 | -0.278611 |
| 11            | 8             | 0           | -1.849311              | -3.019346 | -0.695469 |
| 12            | 6             | 0           | -2.761432              | -1.812446 | 1.177088  |
| 13            | 6             | 0           | -2.271307              | 1.837718  | 1.466864  |
| 14            | 8             | 0           | -2.645939              | 2.950293  | -0.545809 |
| 15            | 8             | 0           | 0.490323               | -1.918172 | 0.537097  |
| 16            | 6             | 0           | 1.674168               | -1.728631 | 1.292103  |
| 17            | 6             | 0           | 2.260352               | -0.385692 | 0.829904  |
| 18            | 6             | 0           | 3.003972               | 0.312217  | 1.956764  |
| 19            | 8             | 0           | 3.20024                | -0.748224 | -0.222369 |
| 20            | 8             | 0           | 3.528897               | 1.385129  | -0.84443  |
| 21            | 6             | 0           | 3.76559                | 0.20779   | -0.969573 |
| 22            | 6             | 0           | 4.713213               | -0.381736 | -1.974515 |
| 23            | 1             | 0           | -1.641552              | 0.986639  | -1.84095  |
| 24            | 1             | 0           | -0.729644              | -0.96506  | -1.4579   |
| 25            | 1             | 0           | -0.520837              | -0.433351 | 1.517131  |
| 26            | 1             | 0           | 1.164957               | 0.384273  | -0.857923 |
| 27            | 1             | 0           | 1.662021               | 2.343761  | 0.647183  |
| 28            | 1             | 0           | 0.489236               | 1.725177  | 1.800183  |
| 29            | 1             | 0           | -0.056496              | 2.539144  | -1.10186  |
| 30            | 1             | 0           | -0.402149              | 3.513403  | 0.3214    |
| 31            | 1             | 0           | -4.03252               | 0.483937  | -0.088188 |

|           |   |   |           |           |           |
|-----------|---|---|-----------|-----------|-----------|
| 32        | 1 | 0 | -3.962707 | 0.765326  | -1.815653 |
| 33        | 1 | 0 | -3.146262 | -1.511652 | -2.228257 |
| 34        | 1 | 0 | -4.380188 | -1.766021 | -0.980478 |
| 35        | 1 | 0 | -1.008701 | -3.17364  | -0.244537 |
| 36        | 1 | 0 | -3.589357 | -2.520462 | 1.253139  |
| 37        | 1 | 0 | -1.948794 | -2.164679 | 1.817502  |
| 38        | 1 | 0 | -3.098665 | -0.843839 | 1.552017  |
| 39        | 1 | 0 | -1.758125 | 1.059731  | 2.028252  |
| 40        | 1 | 0 | -2.086104 | 2.791933  | 1.966193  |
| 41        | 1 | 0 | -3.343674 | 1.64378   | 1.505591  |
| 42        | 1 | 0 | -2.36838  | 3.105821  | -1.455632 |
| 43        | 1 | 0 | 1.427761  | -1.671237 | 2.359458  |
| 44        | 1 | 0 | 2.354967  | -2.559382 | 1.114933  |
| 45        | 1 | 0 | 3.466611  | 1.23791   | 1.619213  |
| 46        | 1 | 0 | 2.312852  | 0.541654  | 2.7696    |
| 47        | 1 | 0 | 3.778603  | -0.353511 | 2.344708  |
| 48        | 1 | 0 | 5.493506  | -0.940184 | -1.455958 |
| 49        | 1 | 0 | 4.173988  | -1.079071 | -2.616954 |
| 50        | 1 | 0 | 5.154171  | 0.412688  | -2.570536 |
| <b>7B</b> |   |   |           |           |           |
| 1         | 6 | 0 | -2.278332 | 0.581275  | -0.797579 |
| 2         | 6 | 0 | -1.359973 | -0.662462 | -0.555826 |
| 3         | 6 | 0 | -0.158038 | -0.523253 | 0.358755  |
| 4         | 6 | 0 | 0.846312  | 0.534544  | -0.076135 |
| 5         | 6 | 0 | 0.517217  | 1.937443  | 0.413321  |
| 6         | 6 | 0 | -0.717658 | 2.549678  | -0.253205 |
| 7         | 6 | 0 | -2.086327 | 1.889836  | 0.010166  |
| 8         | 6 | 0 | -3.723519 | 0.021877  | -0.739075 |
| 9         | 6 | 0 | -3.570887 | -1.485802 | -0.948256 |
| 10        | 6 | 0 | -2.301426 | -1.831854 | -0.173907 |
| 11        | 8 | 0 | -1.783411 | -3.077095 | -0.639484 |
| 12        | 6 | 0 | -2.566993 | -1.931982 | 1.327955  |
| 13        | 6 | 0 | -2.372404 | 1.797369  | 1.505609  |
| 14        | 8 | 0 | -3.088329 | 2.805763  | -0.470303 |
| 15        | 8 | 0 | 0.561358  | -1.775605 | 0.34853   |
| 16        | 6 | 0 | 1.951658  | -1.55332  | 0.109183  |
| 17        | 6 | 0 | 2.178484  | -0.062497 | 0.403913  |
| 18        | 6 | 0 | 2.482204  | 0.20496   | 1.870282  |
| 19        | 8 | 0 | 3.198961  | 0.529575  | -0.429737 |
| 20        | 8 | 0 | 4.717696  | -1.023777 | 0.131884  |
| 21        | 6 | 0 | 4.423956  | -0.014918 | -0.460623 |
| 22        | 6 | 0 | 5.353939  | 0.791236  | -1.319192 |
| 23        | 1 | 0 | -2.093404 | 0.888925  | -1.833441 |

|    |   |   |           |           |           |
|----|---|---|-----------|-----------|-----------|
| 24 | 1 | 0 | -0.946165 | -0.946028 | -1.5305   |
| 25 | 1 | 0 | -0.461866 | -0.344431 | 1.394523  |
| 26 | 1 | 0 | 0.895433  | 0.537089  | -1.173028 |
| 27 | 1 | 0 | 1.371103  | 2.588991  | 0.204078  |
| 28 | 1 | 0 | 0.387502  | 1.931923  | 1.500133  |
| 29 | 1 | 0 | -0.559828 | 2.586245  | -1.338704 |
| 30 | 1 | 0 | -0.811471 | 3.58474   | 0.087673  |
| 31 | 1 | 0 | -4.176239 | 0.219319  | 0.234666  |
| 32 | 1 | 0 | -4.365534 | 0.48691   | -1.486561 |
| 33 | 1 | 0 | -3.393396 | -1.709799 | -2.004776 |
| 34 | 1 | 0 | -4.436117 | -2.062499 | -0.61427  |
| 35 | 1 | 0 | -0.869296 | -3.122321 | -0.327492 |
| 36 | 1 | 0 | -3.321563 | -2.700636 | 1.507878  |
| 37 | 1 | 0 | -1.655729 | -2.214037 | 1.861173  |
| 38 | 1 | 0 | -2.928426 | -0.987975 | 1.742222  |
| 39 | 1 | 0 | -1.728982 | 1.082321  | 2.014381  |
| 40 | 1 | 0 | -2.208961 | 2.779103  | 1.95699   |
| 41 | 1 | 0 | -3.410859 | 1.516826  | 1.683687  |
| 42 | 1 | 0 | -2.939931 | 2.950526  | -1.411649 |
| 43 | 1 | 0 | 2.524482  | -2.211348 | 0.759361  |
| 44 | 1 | 0 | 2.195857  | -1.768963 | -0.936973 |
| 45 | 1 | 0 | 2.607319  | 1.273977  | 2.048298  |
| 46 | 1 | 0 | 1.657848  | -0.157113 | 2.489555  |
| 47 | 1 | 0 | 3.39097   | -0.316683 | 2.169438  |
| 48 | 1 | 0 | 6.31092   | 0.282793  | -1.398344 |
| 49 | 1 | 0 | 4.915509  | 0.932141  | -2.307297 |
| 50 | 1 | 0 | 5.491344  | 1.776333  | -0.870462 |

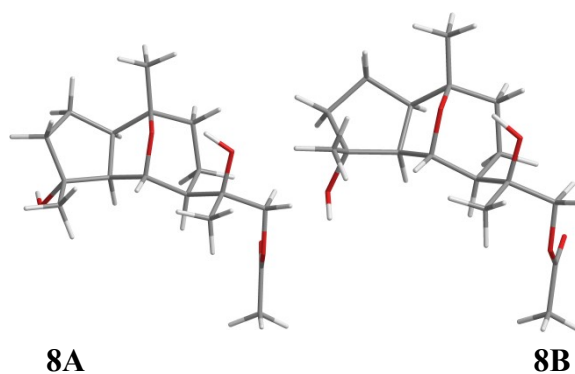

**Figure S114.** Conformers of isomer **8**

**Table S11.** Important thermodynamic parameters and Boltzmann distributions of the optimized isomer **8** at B3LYP/6-31G (d, p) level in gas phase.

| Conformations | Energy (a.u) | $\Delta G$ (kcal/mol) | % | Number of imaginary frequencies |
|---------------|--------------|-----------------------|---|---------------------------------|
|---------------|--------------|-----------------------|---|---------------------------------|

|    |              |      |      |   |
|----|--------------|------|------|---|
| 8A | -1040.293872 | 0.00 | 77.5 | 0 |
| 8B | -1040.292702 | 0.73 | 22.5 | 0 |

**Table S12.** Optimized Z-matrixes of isomer **8** in the gas phase (Å) at B3LYP/6-31G (d) level.

| Center    | Atomic | Atomic | Coordinates (Angstroms) |           |           |
|-----------|--------|--------|-------------------------|-----------|-----------|
| Number    | Number | Type   | X                       | Y         | Z         |
| <b>8A</b> |        |        |                         |           |           |
| 1         | 6      | 0      | 2.247546                | -0.306329 | -1.110003 |
| 2         | 6      | 0      | 1.505078                | 0.861084  | -0.378682 |
| 3         | 6      | 0      | 0.558751                | 0.134281  | 0.592012  |
| 4         | 6      | 0      | -0.830537               | -0.133022 | -0.008564 |
| 5         | 6      | 0      | -0.647066               | -0.905876 | -1.332086 |
| 6         | 6      | 0      | 0.401182                | -2.024753 | -1.231984 |
| 7         | 6      | 0      | 1.642549                | -1.577705 | -0.448183 |
| 8         | 6      | 0      | 3.749899                | -0.064269 | -0.858195 |
| 9         | 6      | 0      | 3.789735                | 0.742176  | 0.440117  |
| 10        | 6      | 0      | 2.620183                | 1.720901  | 0.279508  |
| 11        | 8      | 0      | 2.979291                | 2.772007  | -0.624894 |
| 12        | 6      | 0      | 2.245007                | 2.437473  | 1.563917  |
| 13        | 6      | 0      | -1.770298               | -0.827574 | 1.012596  |
| 14        | 6      | 0      | 2.5949                  | -2.732579 | -0.21383  |
| 15        | 6      | 0      | -3.201636               | -0.934294 | 0.476127  |
| 16        | 1      | 0      | -1.279024               | 0.842123  | -0.232935 |
| 17        | 1      | 0      | 0.934902                | 1.505478  | -1.051692 |
| 18        | 6      | 0      | -1.802611               | -0.091571 | 2.357013  |
| 19        | 8      | 0      | -1.409226               | -2.186656 | 1.225151  |
| 20        | 1      | 0      | 2.033385                | -0.33261  | -2.180216 |
| 21        | 8      | 0      | 1.203178                | -1.118484 | 0.848515  |
| 22        | 8      | 0      | -3.815424               | 0.357411  | 0.384166  |
| 23        | 8      | 0      | -3.491878               | 0.43844   | -1.840216 |
| 24        | 6      | 0      | -3.907785               | 0.933798  | -0.828059 |
| 25        | 6      | 0      | -4.59466                | 2.267555  | -0.730417 |
| 26        | 1      | 0      | 0.473964                | 0.654626  | 1.542542  |
| 27        | 1      | 0      | -0.339478               | -0.186596 | -2.097149 |
| 28        | 1      | 0      | -1.594652               | -1.309526 | -1.685005 |
| 29        | 1      | 0      | -0.029032               | -2.894188 | -0.730676 |
| 30        | 1      | 0      | 0.70533                 | -2.341711 | -2.234445 |
| 31        | 1      | 0      | 4.171463                | 0.524484  | -1.679946 |
| 32        | 1      | 0      | 4.333995                | -0.983226 | -0.819605 |
| 33        | 1      | 0      | 3.590187                | 0.083688  | 1.291236  |
| 34        | 1      | 0      | 4.729085                | 1.271514  | 0.610119  |
| 35        | 1      | 0      | 3.189192                | 2.391803  | -1.482339 |

|           |   |   |           |           |           |
|-----------|---|---|-----------|-----------|-----------|
| 36        | 1 | 0 | 1.332343  | 3.023006  | 1.428031  |
| 37        | 1 | 0 | 2.104106  | 1.735797  | 2.386855  |
| 38        | 1 | 0 | 3.051968  | 3.122777  | 1.829043  |
| 39        | 1 | 0 | 3.042707  | -3.057413 | -1.156095 |
| 40        | 1 | 0 | 3.388556  | -2.447904 | 0.478451  |
| 41        | 1 | 0 | 2.051647  | -3.575709 | 0.217618  |
| 42        | 1 | 0 | -3.791101 | -1.500054 | 1.197488  |
| 43        | 1 | 0 | -3.234065 | -1.433769 | -0.489519 |
| 44        | 1 | 0 | -2.606491 | -0.498883 | 2.972992  |
| 45        | 1 | 0 | -0.866265 | -0.239445 | 2.897558  |
| 46        | 1 | 0 | -1.97402  | 0.97949   | 2.227318  |
| 47        | 1 | 0 | -0.461428 | -2.196606 | 1.414731  |
| 48        | 1 | 0 | -4.038938 | 2.915469  | -0.050998 |
| 49        | 1 | 0 | -4.653218 | 2.71697   | -1.717949 |
| 50        | 1 | 0 | -5.594056 | 2.132888  | -0.314906 |
| <b>8B</b> |   |   |           |           |           |
| 1         | 6 | 0 | 2.282509  | -0.330039 | -1.067419 |
| 2         | 6 | 0 | 1.518203  | 0.83681   | -0.373501 |
| 3         | 6 | 0 | 0.567151  | 0.112403  | 0.593434  |
| 4         | 6 | 0 | -0.82446  | -0.136131 | -0.008011 |
| 5         | 6 | 0 | -0.642097 | -0.87774  | -1.349482 |
| 6         | 6 | 0 | 0.396942  | -2.006388 | -1.273643 |
| 7         | 6 | 0 | 1.639809  | -1.601151 | -0.469777 |
| 8         | 6 | 0 | 3.769326  | -0.077262 | -0.755174 |
| 9         | 6 | 0 | 3.841028  | 1.439299  | -0.60149  |
| 10        | 6 | 0 | 2.606058  | 1.768926  | 0.242189  |
| 11        | 8 | 0 | 2.298692  | 3.144311  | 0.034751  |
| 12        | 6 | 0 | 2.871408  | 1.522805  | 1.727083  |
| 13        | 6 | 0 | -1.766651 | -0.849772 | 0.997187  |
| 14        | 6 | 0 | 2.567005  | -2.784167 | -0.272827 |
| 15        | 6 | 0 | -3.198523 | -0.939522 | 0.459361  |
| 16        | 1 | 0 | -1.269047 | 0.84573   | -0.211441 |
| 17        | 1 | 0 | 0.960405  | 1.44207   | -1.090903 |
| 18        | 6 | 0 | -1.795329 | -0.143476 | 2.357625  |
| 19        | 8 | 0 | -1.410611 | -2.214075 | 1.18069   |
| 20        | 1 | 0 | 2.13019   | -0.308742 | -2.149518 |
| 21        | 8 | 0 | 1.201415  | -1.154524 | 0.83465   |
| 22        | 8 | 0 | -3.808535 | 0.355954  | 0.396881  |
| 23        | 8 | 0 | -3.490413 | 0.483488  | -1.826156 |
| 24        | 6 | 0 | -3.90368  | 0.957496  | -0.80298  |
| 25        | 6 | 0 | -4.591921 | 2.288254  | -0.676334 |
| 26        | 1 | 0 | 0.491132  | 0.616305  | 1.554992  |
| 27        | 1 | 0 | -0.325716 | -0.143302 | -2.096127 |

|    |   |   |           |           |           |
|----|---|---|-----------|-----------|-----------|
| 28 | 1 | 0 | -1.591459 | -1.26577  | -1.715138 |
| 29 | 1 | 0 | -0.045425 | -2.886797 | -0.802899 |
| 30 | 1 | 0 | 0.705293  | -2.296228 | -2.282898 |
| 31 | 1 | 0 | 4.431829  | -0.467204 | -1.529374 |
| 32 | 1 | 0 | 4.051634  | -0.550925 | 0.188112  |
| 33 | 1 | 0 | 4.76311   | 1.80265   | -0.144019 |
| 34 | 1 | 0 | 3.722646  | 1.93084   | -1.572159 |
| 35 | 1 | 0 | 1.62804   | 3.411677  | 0.669159  |
| 36 | 1 | 0 | 2.03996   | 1.88326   | 2.340285  |
| 37 | 1 | 0 | 2.999489  | 0.460476  | 1.943979  |
| 38 | 1 | 0 | 3.768157  | 2.066731  | 2.029533  |
| 39 | 1 | 0 | 2.99756   | -3.085886 | -1.23083  |
| 40 | 1 | 0 | 3.376237  | -2.545185 | 0.416702  |
| 41 | 1 | 0 | 2.009698  | -3.6304   | 0.134292  |
| 42 | 1 | 0 | -3.789621 | -1.519795 | 1.167771  |
| 43 | 1 | 0 | -3.232382 | -1.416673 | -0.517459 |
| 44 | 1 | 0 | -0.856776 | -0.302308 | 2.891242  |
| 45 | 1 | 0 | -1.969735 | 0.929848  | 2.251848  |
| 46 | 1 | 0 | -2.596615 | -0.565417 | 2.967125  |
| 47 | 1 | 0 | -0.461692 | -2.231504 | 1.365183  |
| 48 | 1 | 0 | -4.638752 | 2.764981  | -1.651615 |
| 49 | 1 | 0 | -5.596733 | 2.140953  | -0.278321 |
| 50 | 1 | 0 | -4.0465   | 2.917317  | 0.028513  |

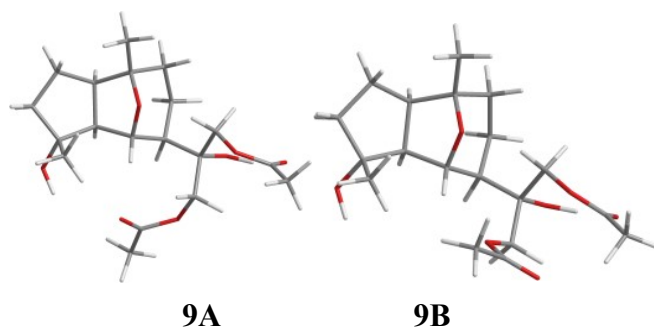

**Figure S115.** Conformers of isomer **9**

**Table S13.** Important thermodynamic parameters and Boltzmann distributions of the optimized isomer **9** at B3LYP/6-31G (d, p) level in gas phase.

| Conformations | Energy (a.u) | $\Delta G$ (kcal/mol) | %    | Number of imaginary frequencies |
|---------------|--------------|-----------------------|------|---------------------------------|
| 9A            | -1268.136967 | 0.00                  | 19.8 | 0                               |
| 9B            | -1268.138285 | -0.83                 | 80.2 | 0                               |

**Table S14.** Optimized Z-matrixes of isomer **9** in the gas phase ( $\text{\AA}$ ) at B3LYP/6-31G (d) level.

| Center | Atomic | Atomic | Coordinates(Angstroms) |
|--------|--------|--------|------------------------|
|--------|--------|--------|------------------------|

| Number    | Number | Type | X        | Y        | Z        |
|-----------|--------|------|----------|----------|----------|
| <b>9A</b> |        |      |          |          |          |
| 1         | 6      | 0    | 3.122668 | 1.074939 | 0.302355 |
| 2         | 6      | 0    | 2.60961  | 0.063529 | 0.76586  |
| 3         | 6      | 0    | 1.127612 | 0.12991  | 0.390027 |
| 4         | 6      | 0    | 0.234029 | 0.823929 | 1.195417 |
| 5         | 6      | 0    | 0.684038 | 2.277938 | 0.938252 |
| 6         | 6      | 0    | 1.068052 | 2.547817 | 0.525156 |
| 7         | 6      | 0    | 1.865116 | 1.389396 | 1.143712 |
| 8         | 6      | 0    | 4.281654 | 0.351976 | 1.015135 |
| 9         | 6      | 0    | 4.816821 | 0.59365  | 0.057294 |
| 10        | 6      | 0    | 3.545198 | 1.178294 | 0.679278 |
| 11        | 8      | 0    | 3.882321 | 1.674598 | 1.976802 |
| 12        | 6      | 0    | 2.990055 | 2.322235 | 0.167853 |
| 13        | 6      | 0    | 1.291216 | 0.608514 | 1.051094 |
| 14        | 6      | 0    | 2.100757 | 1.635137 | 2.621285 |
| 15        | 6      | 0    | 1.692599 | 0.857578 | 1.281698 |
| 16        | 6      | 0    | 1.820256 | 1.091492 | 0.30947  |
| 17        | 8      | 0    | 1.845925 | 1.352206 | 2.131985 |
| 18        | 8      | 0    | 1.076936 | 0.189647 | 1.005316 |
| 19        | 8      | 0    | 1.438973 | 1.63601  | 0.106423 |
| 20        | 8      | 0    | 3.532572 | 2.457654 | 0.083467 |
| 21        | 6      | 0    | 2.450062 | 2.337932 | 0.433087 |
| 22        | 6      | 0    | 2.048068 | 2.917254 | 1.755726 |
| 23        | 8      | 0    | 3.061244 | 0.475683 | 0.721077 |
| 24        | 8      | 0    | 4.2521   | 1.617325 | 0.790586 |
| 25        | 6      | 0    | 4.20504  | 0.853678 | 0.150253 |
| 26        | 6      | 0    | 5.39066  | 0.215783 | 0.803548 |
| 27        | 1      | 0    | 3.498545 | 1.986881 | 0.1679   |
| 28        | 1      | 0    | 2.707206 | 0.459956 | 1.77852  |
| 29        | 1      | 0    | 0.794126 | 1.159773 | 0.494827 |
| 30        | 1      | 0    | 0.413145 | 0.599435 | 2.253008 |
| 31        | 1      | 0    | 1.554638 | 2.476595 | 1.569441 |
| 32        | 1      | 0    | 0.092785 | 2.971327 | 1.266209 |
| 33        | 1      | 0    | 0.177829 | 2.704504 | 1.140221 |
| 34        | 1      | 0    | 1.660111 | 3.465437 | 0.587486 |
| 35        | 1      | 0    | 5.033665 | 1.043933 | 1.396591 |
| 36        | 1      | 0    | 3.912904 | 0.233616 | 1.860341 |
| 37        | 1      | 0    | 5.486451 | 1.367714 | 0.323211 |
| 38        | 1      | 0    | 5.344406 | 0.027817 | 0.832042 |
| 39        | 1      | 0    | 3.107574 | 2.107618 | 2.350447 |
| 40        | 1      | 0    | 2.156429 | 2.816065 | 0.338657 |
| 41        | 1      | 0    | 2.626659 | 1.965067 | 1.133146 |

|           |   |   |           |           |           |
|-----------|---|---|-----------|-----------|-----------|
| 42        | 1 | 0 | 3.773328  | 3.065016  | 0.331624  |
| 43        | 1 | 0 | 2.777011  | 2.482774  | 2.755932  |
| 44        | 1 | 0 | 2.535143  | 0.760791  | 3.105797  |
| 45        | 1 | 0 | 1.154867  | 1.867476  | 3.115632  |
| 46        | 1 | 0 | 1.112231  | 1.279702  | 2.104622  |
| 47        | 1 | 0 | 2.751279  | 0.911667  | 1.53321   |
| 48        | 1 | 0 | 1.947964  | 2.176193  | 0.291785  |
| 49        | 1 | 0 | 1.124712  | 0.806376  | 1.092856  |
| 50        | 1 | 0 | 2.761418  | 1.573451  | 1.90535   |
| 51        | 1 | 0 | 1.06339   | 3.378364  | 1.684467  |
| 52        | 1 | 0 | 2.789602  | 3.640597  | 2.083919  |
| 53        | 1 | 0 | 1.985599  | 2.099932  | 2.478228  |
| 54        | 1 | 0 | 6.301453  | 0.539613  | 0.307762  |
| 55        | 1 | 0 | 5.414729  | 0.489918  | 1.858919  |
| 56        | 1 | 0 | 5.282677  | 0.86816   | 0.737311  |
| <b>9B</b> |   |   |           |           |           |
| 1         | 6 | 0 | -2.526179 | -1.514811 | 0.729202  |
| 2         | 6 | 0 | -2.184029 | -0.03794  | 0.381115  |
| 3         | 6 | 0 | -0.793583 | -0.13475  | -0.256393 |
| 4         | 6 | 0 | 0.28496   | 0.117247  | 0.806347  |
| 5         | 6 | 0 | 0.193171  | -0.979708 | 1.894196  |
| 6         | 6 | 0 | -0.207709 | -2.370339 | 1.378587  |
| 7         | 6 | 0 | -1.270574 | -2.301932 | 0.273586  |
| 8         | 6 | 0 | -3.856181 | -1.79001  | -0.003841 |
| 9         | 6 | 0 | -4.50291  | -0.405541 | -0.101664 |
| 10        | 6 | 0 | -3.335378 | 0.498081  | -0.509628 |
| 11        | 8 | 0 | -3.647177 | 1.852904  | -0.182218 |
| 12        | 6 | 0 | -3.059881 | 0.405208  | -2.010997 |
| 13        | 6 | 0 | 1.686587  | 0.388829  | 0.220601  |
| 14        | 6 | 0 | -1.533286 | -3.680244 | -0.301352 |
| 15        | 6 | 0 | 1.690861  | 1.682088  | -0.609645 |
| 16        | 6 | 0 | 2.165644  | -0.757839 | -0.673209 |
| 17        | 8 | 0 | 2.612648  | 0.623306  | 1.276549  |
| 18        | 8 | 0 | -0.721446 | -1.470594 | -0.76435  |
| 19        | 8 | 0 | 1.313937  | 2.815091  | 0.188061  |
| 20        | 8 | 0 | -0.791456 | 2.825439  | -0.599692 |
| 21        | 6 | 0 | 0.064807  | 3.289269  | 0.119576  |
| 22        | 6 | 0 | -0.13006  | 4.441895  | 1.057443  |
| 23        | 8 | 0 | 3.496293  | -0.516711 | -1.160424 |
| 24        | 8 | 0 | 4.38333   | -1.534977 | 0.630544  |
| 25        | 6 | 0 | 4.523395  | -0.976777 | -0.432974 |
| 26        | 6 | 0 | 5.834485  | -0.709492 | -1.106279 |
| 27        | 1 | 0 | -2.673933 | -1.640482 | 1.80463   |

|    |   |   |           |           |           |
|----|---|---|-----------|-----------|-----------|
| 28 | 1 | 0 | -2.160778 | 0.590941  | 1.273603  |
| 29 | 1 | 0 | -0.675556 | 0.529053  | -1.106713 |
| 30 | 1 | 0 | 0.027179  | 1.053558  | 1.308833  |
| 31 | 1 | 0 | -0.562545 | -0.651926 | 2.613691  |
| 32 | 1 | 0 | 1.125889  | -1.041335 | 2.458792  |
| 33 | 1 | 0 | 0.656853  | -2.894054 | 0.959865  |
| 34 | 1 | 0 | -0.575371 | -2.97654  | 2.211619  |
| 35 | 1 | 0 | -4.477165 | -2.518669 | 0.519001  |
| 36 | 1 | 0 | -3.675679 | -2.174353 | -1.010005 |
| 37 | 1 | 0 | -5.337626 | -0.356338 | -0.80427  |
| 38 | 1 | 0 | -4.857423 | -0.082749 | 0.882687  |
| 39 | 1 | 0 | -2.853028 | 2.378614  | -0.355151 |
| 40 | 1 | 0 | -2.30549  | 1.138677  | -2.306362 |
| 41 | 1 | 0 | -2.699579 | -0.58431  | -2.2981   |
| 42 | 1 | 0 | -3.978468 | 0.624337  | -2.559427 |
| 43 | 1 | 0 | -2.036356 | -4.304615 | 0.440998  |
| 44 | 1 | 0 | -2.158074 | -3.62572  | -1.192876 |
| 45 | 1 | 0 | -0.589771 | -4.159066 | -0.571866 |
| 46 | 1 | 0 | 2.709606  | 1.884614  | -0.934433 |
| 47 | 1 | 0 | 1.03669   | 1.609649  | -1.4771   |
| 48 | 1 | 0 | 2.145956  | -1.701569 | -0.128279 |
| 49 | 1 | 0 | 1.537672  | -0.848592 | -1.556667 |
| 50 | 1 | 0 | 3.010142  | -0.215093 | 1.541518  |
| 51 | 1 | 0 | 0.652711  | 5.184095  | 0.902102  |
| 52 | 1 | 0 | -1.111169 | 4.881241  | 0.899781  |
| 53 | 1 | 0 | -0.046855 | 4.07687   | 2.083143  |
| 54 | 1 | 0 | 6.645344  | -1.097635 | -0.496402 |
| 55 | 1 | 0 | 5.84133   | -1.17951  | -2.090278 |
| 56 | 1 | 0 | 5.951623  | 0.365854  | -1.248131 |

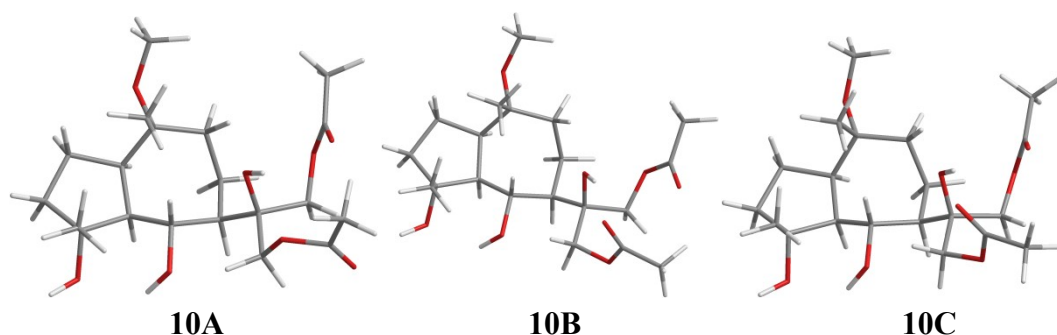

**Figure S116.** Conformers of isomer **10**

**Table S15.** Important thermodynamic parameters and Boltzmann distributions of the optimized isomer **10** at B3LYP/6-31G (d, p) level in gas phase.

| Conformations | Energy (a.u) | $\Delta G$ (kcal/mol) | % | Number of imaginary frequencies |
|---------------|--------------|-----------------------|---|---------------------------------|
|---------------|--------------|-----------------------|---|---------------------------------|

|     |              |      |      |   |
|-----|--------------|------|------|---|
| 10A | -1383.789542 | 0.00 | 72.2 | 0 |
| 10B | -1383.787995 | 0.97 | 14.0 | 0 |
| 10C | -1383.787977 | 0.98 | 13.8 | 0 |

**Table S16.** Optimized Z-matrixes of isomer **10** in the gas phase (Å) at B3LYP/6-31G (d) level.

| Center     | Atomic | Atomic | Coordinates (Angstroms) |           |           |
|------------|--------|--------|-------------------------|-----------|-----------|
| Number     | Number | Type   | X                       | Y         | Z         |
| <b>10A</b> |        |        |                         |           |           |
| 1          | 6      | 0      | -2.965436               | 0.479836  | -0.459435 |
| 2          | 6      | 0      | -2.412136               | -0.982932 | -0.621471 |
| 3          | 6      | 0      | -4.341659               | 0.329803  | 0.23477   |
| 4          | 6      | 0      | -4.732465               | -1.127236 | 0.00133   |
| 5          | 6      | 0      | -3.411643               | -1.875961 | 0.16397   |
| 6          | 6      | 0      | -0.946061               | -1.326483 | -0.317517 |
| 7          | 6      | 0      | 0.099433                | -0.546727 | -1.142933 |
| 8          | 6      | 0      | -0.410755               | 0.785773  | -1.71013  |
| 9          | 6      | 0      | -0.85063                | 1.87996   | -0.733217 |
| 10         | 6      | 0      | -2.081293               | 1.579839  | 0.163643  |
| 11         | 6      | 0      | 1.449511                | -0.431501 | -0.398571 |
| 12         | 1      | 0      | 0.299243                | -1.181717 | -2.014007 |
| 13         | 6      | 0      | 2.009337                | -1.823739 | -0.072238 |
| 14         | 6      | 0      | 2.503505                | 0.303401  | -1.264695 |
| 15         | 8      | 0      | 1.23006                 | 0.26442   | 0.817672  |
| 16         | 1      | 0      | -3.165898               | 0.845996  | -1.470327 |
| 17         | 6      | 0      | -3.050511               | -2.067517 | 1.635762  |
| 18         | 1      | 0      | -2.564843               | -1.258332 | -1.672622 |
| 19         | 8      | 0      | -0.726399               | -2.716781 | -0.60434  |
| 20         | 8      | 0      | -3.436272               | -3.161083 | -0.481896 |
| 21         | 6      | 0      | -1.673575               | 1.329471  | 1.616137  |
| 22         | 8      | 0      | 2.403082                | 1.723541  | -1.134433 |
| 23         | 8      | 0      | 3.773464                | 1.661885  | 0.642554  |
| 24         | 6      | 0      | 3.06456                 | 2.285202  | -0.112368 |
| 25         | 6      | 0      | 2.797045                | 3.758042  | -0.035192 |
| 26         | 8      | 0      | 3.114202                | -1.653803 | 0.833653  |
| 27         | 8      | 0      | 4.628342                | -2.302062 | -0.693932 |
| 28         | 6      | 0      | 4.36766                 | -1.892183 | 0.409164  |
| 29         | 6      | 0      | 5.365014                | -1.54863  | 1.473721  |
| 30         | 8      | 0      | -2.968226               | 2.721831  | 0.11984   |
| 31         | 6      | 0      | -2.487089               | 3.917259  | 0.699356  |
| 32         | 1      | 0      | -5.068241               | 1.031897  | -0.171009 |
| 33         | 1      | 0      | -4.267136               | 0.53326   | 1.304725  |

|            |   |   |           |           |           |
|------------|---|---|-----------|-----------|-----------|
| 34         | 1 | 0 | -5.07972  | -1.271684 | -1.026463 |
| 35         | 1 | 0 | -5.505607 | -1.490947 | 0.682422  |
| 36         | 1 | 0 | -0.742688 | -1.171888 | 0.744418  |
| 37         | 1 | 0 | 0.3675    | 1.213033  | -2.345751 |
| 38         | 1 | 0 | -1.235859 | 0.553955  | -2.388812 |
| 39         | 1 | 0 | -0.000424 | 2.173686  | -0.116479 |
| 40         | 1 | 0 | -1.122209 | 2.743828  | -1.347907 |
| 41         | 1 | 0 | 1.271375  | -2.419296 | 0.458119  |
| 42         | 1 | 0 | 2.333371  | -2.348927 | -0.970855 |
| 43         | 1 | 0 | 2.340705  | 0.084448  | -2.31967  |
| 44         | 1 | 0 | 3.515406  | 0.004575  | -0.998178 |
| 45         | 1 | 0 | 2.050916  | 0.23064   | 1.326559  |
| 46         | 1 | 0 | -2.122746 | -2.633554 | 1.741273  |
| 47         | 1 | 0 | -3.849275 | -2.619098 | 2.139775  |
| 48         | 1 | 0 | -2.929292 | -1.110219 | 2.144818  |
| 49         | 1 | 0 | -1.569198 | -3.188925 | -0.541173 |
| 50         | 1 | 0 | -3.995166 | -3.755712 | 0.030674  |
| 51         | 1 | 0 | -1.062211 | 2.159523  | 1.976776  |
| 52         | 1 | 0 | -2.547437 | 1.24649   | 2.265329  |
| 53         | 1 | 0 | -1.060133 | 0.438293  | 1.71244   |
| 54         | 1 | 0 | 2.89981   | 4.212328  | -1.020152 |
| 55         | 1 | 0 | 1.766476  | 3.905174  | 0.29673   |
| 56         | 1 | 0 | 3.478406  | 4.21898   | 0.674728  |
| 57         | 1 | 0 | 5.356552  | -0.464193 | 1.605616  |
| 58         | 1 | 0 | 5.078283  | -2.006654 | 2.419943  |
| 59         | 1 | 0 | 6.355117  | -1.87879  | 1.171574  |
| 60         | 1 | 0 | -3.160039 | 4.712735  | 0.379527  |
| 61         | 1 | 0 | -2.494092 | 3.872342  | 1.79256   |
| 62         | 1 | 0 | -1.473852 | 4.161095  | 0.361951  |
| <b>10B</b> |   |   |           |           |           |
| 1          | 6 | 0 | -2.920612 | 0.629644  | -0.375357 |
| 2          | 6 | 0 | -2.442913 | -0.840041 | -0.665169 |
| 3          | 6 | 0 | -4.259309 | 0.487663  | 0.391057  |
| 4          | 6 | 0 | -4.722786 | -0.937016 | 0.097203  |
| 5          | 6 | 0 | -3.425677 | -1.742222 | 0.12935   |
| 6          | 6 | 0 | -0.975815 | -1.249035 | -0.47611  |
| 7          | 6 | 0 | 0.038333  | -0.471842 | -1.336357 |
| 8          | 6 | 0 | -0.432821 | 0.927721  | -1.759629 |
| 9          | 6 | 0 | -0.763887 | 1.963535  | -0.680842 |
| 10         | 6 | 0 | -1.955742 | 1.651783  | 0.263632  |
| 11         | 6 | 0 | 1.446381  | -0.475834 | -0.687838 |
| 12         | 1 | 0 | 0.127302  | -1.046734 | -2.26543  |
| 13         | 6 | 0 | 1.915135  | -1.924561 | -0.469902 |

|    |   |   |           |           |           |
|----|---|---|-----------|-----------|-----------|
| 14 | 6 | 0 | 2.470943  | 0.229547  | -1.623434 |
| 15 | 8 | 0 | 1.344629  | 0.21587   | 0.54769   |
| 16 | 1 | 0 | -3.163276 | 1.071286  | -1.345983 |
| 17 | 6 | 0 | -2.980082 | -2.035878 | 1.56067   |
| 18 | 1 | 0 | -2.673718 | -1.04182  | -1.718983 |
| 19 | 8 | 0 | -0.819458 | -2.633495 | -0.824541 |
| 20 | 8 | 0 | -3.541198 | -2.983767 | -0.588012 |
| 21 | 6 | 0 | -1.479537 | 1.296659  | 1.673162  |
| 22 | 8 | 0 | 2.56346   | 1.618315  | -1.308258 |
| 23 | 8 | 0 | 4.118126  | 1.140395  | 0.240645  |
| 24 | 6 | 0 | 3.373158  | 1.932476  | -0.285332 |
| 25 | 6 | 0 | 3.220882  | 3.37149   | 0.105765  |
| 26 | 8 | 0 | 3.330352  | -2.028106 | -0.200915 |
| 27 | 8 | 0 | 3.072328  | -1.453925 | 1.949309  |
| 28 | 6 | 0 | 3.787205  | -1.787701 | 1.02875   |
| 29 | 6 | 0 | 5.271429  | -1.954681 | 1.112673  |
| 30 | 8 | 0 | -2.797345 | 2.826579  | 0.341436  |
| 31 | 6 | 0 | -2.239902 | 3.963299  | 0.9683    |
| 32 | 1 | 0 | -4.97925  | 1.239909  | 0.072686  |
| 33 | 1 | 0 | -4.113809 | 0.622687  | 1.464487  |
| 34 | 1 | 0 | -5.139128 | -1.004833 | -0.912652 |
| 35 | 1 | 0 | -5.466269 | -1.312946 | 0.804238  |
| 36 | 1 | 0 | -0.697605 | -1.140559 | 0.57446   |
| 37 | 1 | 0 | 0.330049  | 1.370328  | -2.404128 |
| 38 | 1 | 0 | -1.304555 | 0.791407  | -2.405534 |
| 39 | 1 | 0 | 0.133651  | 2.17764   | -0.099339 |
| 40 | 1 | 0 | -1.031614 | 2.879209  | -1.217284 |
| 41 | 1 | 0 | 1.355726  | -2.390781 | 0.341168  |
| 42 | 1 | 0 | 1.772458  | -2.505643 | -1.378475 |
| 43 | 1 | 0 | 2.141326  | 0.175241  | -2.659787 |
| 44 | 1 | 0 | 3.458239  | -0.217126 | -1.539413 |
| 45 | 1 | 0 | 1.909962  | -0.215442 | 1.204154  |
| 46 | 1 | 0 | -2.066668 | -2.634042 | 1.572028  |
| 47 | 1 | 0 | -3.763766 | -2.593769 | 2.081001  |
| 48 | 1 | 0 | -2.795669 | -1.116196 | 2.117615  |
| 49 | 1 | 0 | -1.676306 | -3.076825 | -0.747586 |
| 50 | 1 | 0 | -4.097125 | -3.585107 | -0.080028 |
| 51 | 1 | 0 | -0.81576  | 2.079653  | 2.04612   |
| 52 | 1 | 0 | -2.318342 | 1.20707   | 2.366235  |
| 53 | 1 | 0 | -0.899172 | 0.378671  | 1.680783  |
| 54 | 1 | 0 | 4.044638  | 3.669762  | 0.748897  |
| 55 | 1 | 0 | 3.170993  | 4.004988  | -0.778956 |
| 56 | 1 | 0 | 2.278188  | 3.474774  | 0.649039  |

|            |   |   |           |           |           |
|------------|---|---|-----------|-----------|-----------|
| 57         | 1 | 0 | 5.578601  | -1.990047 | 2.154467  |
| 58         | 1 | 0 | 5.589044  | -2.850601 | 0.581673  |
| 59         | 1 | 0 | 5.72373   | -1.086267 | 0.627893  |
| 60         | 1 | 0 | -2.8964   | 4.801868  | 0.736288  |
| 61         | 1 | 0 | -2.192266 | 3.847598  | 2.055291  |
| 62         | 1 | 0 | -1.236656 | 4.191677  | 0.592675  |
| <b>10C</b> |   |   |           |           |           |
| 1          | 6 | 0 | -2.920816 | 0.629625  | -0.375323 |
| 2          | 6 | 0 | -2.443099 | -0.840042 | -0.665157 |
| 3          | 6 | 0 | -4.259535 | 0.487655  | 0.391047  |
| 4          | 6 | 0 | -4.723044 | -0.937005 | 0.097049  |
| 5          | 6 | 0 | -3.425951 | -1.742217 | 0.129218  |
| 6          | 6 | 0 | -0.976026 | -1.249052 | -0.475855 |
| 7          | 6 | 0 | 0.038282  | -0.471898 | -1.33595  |
| 8          | 6 | 0 | -0.432796 | 0.927638  | -1.759308 |
| 9          | 6 | 0 | -0.764116 | 1.963544  | -0.680656 |
| 10         | 6 | 0 | -1.955979 | 1.651805  | 0.26372   |
| 11         | 6 | 0 | 1.446273  | -0.475944 | -0.687298 |
| 12         | 1 | 0 | 0.12735   | -1.046804 | -2.265007 |
| 13         | 6 | 0 | 1.914804  | -1.924697 | -0.468979 |
| 14         | 6 | 0 | 2.470949  | 0.229035  | -1.623193 |
| 15         | 8 | 0 | 1.344195  | 0.215939  | 0.548066  |
| 16         | 1 | 0 | -3.163421 | 1.071324  | -1.345936 |
| 17         | 6 | 0 | -2.98044  | -2.035903 | 1.560587  |
| 18         | 1 | 0 | -2.673771 | -1.041761 | -1.719015 |
| 19         | 8 | 0 | -0.819606 | -2.633482 | -0.824314 |
| 20         | 8 | 0 | -3.541425 | -2.98375  | -0.58815  |
| 21         | 6 | 0 | -1.479846 | 1.296893  | 1.673303  |
| 22         | 8 | 0 | 2.563912  | 1.617897  | -1.308446 |
| 23         | 8 | 0 | 4.117732  | 1.139681  | 0.241121  |
| 24         | 6 | 0 | 3.373451  | 1.93206   | -0.285478 |
| 25         | 6 | 0 | 3.222186  | 3.371382  | 0.104835  |
| 26         | 8 | 0 | 3.330129  | -2.028655 | -0.200679 |
| 27         | 8 | 0 | 3.073595  | -1.452517 | 1.949206  |
| 28         | 6 | 0 | 3.787812  | -1.787325 | 1.028519  |
| 29         | 6 | 0 | 5.272041  | -1.954509 | 1.111679  |
| 30         | 8 | 0 | -2.797637 | 2.826608  | 0.341349  |
| 31         | 6 | 0 | -2.240105 | 3.963601  | 0.967627  |
| 32         | 1 | 0 | -4.979454 | 1.239914  | 0.072665  |
| 33         | 1 | 0 | -4.114078 | 0.62262   | 1.464488  |
| 34         | 1 | 0 | -5.139338 | -1.004657 | -0.912837 |
| 35         | 1 | 0 | -5.466579 | -1.312988 | 0.804     |
| 36         | 1 | 0 | -0.698037 | -1.140532 | 0.57477   |

|    |   |   |           |           |           |
|----|---|---|-----------|-----------|-----------|
| 37 | 1 | 0 | 0.330165  | 1.370269  | -2.403683 |
| 38 | 1 | 0 | -1.304418 | 0.791266  | -2.405354 |
| 39 | 1 | 0 | 0.133352  | 2.177808  | -0.099099 |
| 40 | 1 | 0 | -1.03184  | 2.879125  | -1.217267 |
| 41 | 1 | 0 | 1.355645  | -2.390374 | 0.342573  |
| 42 | 1 | 0 | 1.771532  | -2.506115 | -1.377237 |
| 43 | 1 | 0 | 2.141086  | 0.174577  | -2.65945  |
| 44 | 1 | 0 | 3.458156  | -0.217857 | -1.539309 |
| 45 | 1 | 0 | 1.911596  | -0.213594 | 1.203918  |
| 46 | 1 | 0 | -2.067162 | -2.634289 | 1.571969  |
| 47 | 1 | 0 | -3.764253 | -2.593559 | 2.080963  |
| 48 | 1 | 0 | -2.795716 | -1.116238 | 2.117449  |
| 49 | 1 | 0 | -1.676438 | -3.076856 | -0.747384 |
| 50 | 1 | 0 | -4.097519 | -3.585057 | -0.080309 |
| 51 | 1 | 0 | -0.816527 | 2.08026   | 2.046312  |
| 52 | 1 | 0 | -2.318694 | 1.206934  | 2.366275  |
| 53 | 1 | 0 | -0.898955 | 0.379236  | 1.68101   |
| 54 | 1 | 0 | 3.173862  | 4.004548  | -0.780222 |
| 55 | 1 | 0 | 2.279042  | 3.475857  | 0.647079  |
| 56 | 1 | 0 | 4.045615  | 3.669137  | 0.74863   |
| 57 | 1 | 0 | 5.579563  | -1.991522 | 2.153319  |
| 58 | 1 | 0 | 5.589618  | -2.849453 | 0.579055  |
| 59 | 1 | 0 | 5.72408   | -1.085139 | 0.628326  |
| 60 | 1 | 0 | -2.896614 | 4.802075  | 0.735297  |
| 61 | 1 | 0 | -2.192361 | 3.848421  | 2.054669  |
| 62 | 1 | 0 | -1.236891 | 4.19178   | 0.59179   |

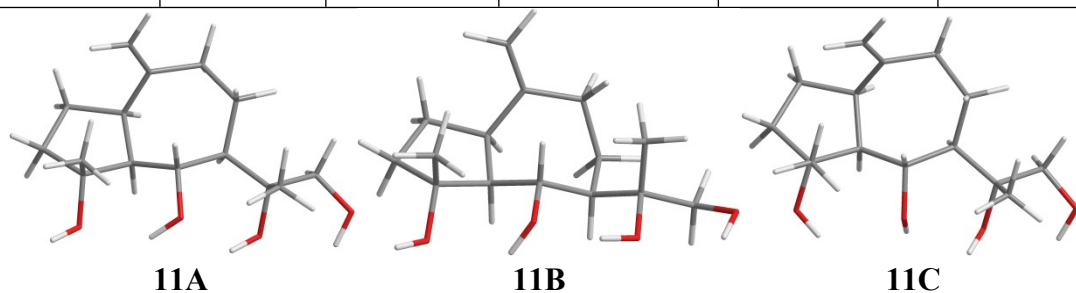

**Figure S117.** Conformers of isomer **11**

**Table S17.** Important thermodynamic parameters and Boltzmann distributions of the optimized isomer **11** at B3LYP/6-31G (d, p) level in gas phase.

| Conformations | Energy (a.u) | $\Delta G(\text{kcal/mol})$ | %    | Number of imaginary frequencies |
|---------------|--------------|-----------------------------|------|---------------------------------|
| 11A           | -887.659169  | 0.00                        | 47.5 | 0                               |
| 11B           | -887.657074  | 1.31                        | 5.2  | 0                               |
| 11C           | -887.659166  | 0.00                        | 47.3 | 0                               |

**Table S18.** Optimized Z-matrixes of isomer **11** in the gas phase (Å) at B3LYP/6-31G (d) level.

| Center     | Atomic | Atomic | Coordinates (Angstroms) |           |           |
|------------|--------|--------|-------------------------|-----------|-----------|
| Number     | Number | Type   | X                       | Y         | Z         |
| <b>11A</b> |        |        |                         |           |           |
| 1          | 6      | 0      | -1.875621               | 1.002094  | -0.820345 |
| 2          | 6      | 0      | -1.228477               | -0.398492 | -0.542598 |
| 3          | 6      | 0      | 0.035689                | -0.463089 | 0.32328   |
| 4          | 6      | 0      | 1.225111                | 0.349381  | -0.258226 |
| 5          | 6      | 0      | 1.163148                | 1.80962   | 0.219157  |
| 6          | 6      | 0      | -0.003067               | 2.649686  | -0.315697 |
| 7          | 6      | 0      | -1.369116               | 2.127865  | 0.059434  |
| 8          | 6      | 0      | -3.40712                | 0.761995  | -0.80346  |
| 9          | 6      | 0      | -3.576155               | -0.75611  | -0.852728 |
| 10         | 6      | 0      | -2.399627               | -1.265824 | -0.021852 |
| 11         | 1      | 0      | -1.590149               | 1.27902   | -1.839239 |
| 12         | 6      | 0      | -2.638579               | -1.114505 | 1.478538  |
| 13         | 1      | 0      | -0.955783               | -0.841207 | -1.508485 |
| 14         | 6      | 0      | -2.028142               | 2.661291  | 1.08732   |
| 15         | 6      | 0      | 2.611866                | -0.278167 | 0.060027  |
| 16         | 6      | 0      | 2.851037                | -0.492156 | 1.556064  |
| 17         | 6      | 0      | 3.749729                | 0.577351  | -0.530206 |
| 18         | 8      | 0      | 4.957697                | -0.144214 | -0.561473 |
| 19         | 8      | 0      | 2.752025                | -1.508334 | -0.648664 |
| 20         | 1      | 0      | 1.150895                | 0.328671  | -1.354582 |
| 21         | 8      | 0      | 0.400624                | -1.841239 | 0.473597  |
| 22         | 8      | 0      | -2.088837               | -2.634607 | -0.3226   |
| 23         | 1      | 0      | -0.182403               | -0.06815  | 1.32491   |
| 24         | 1      | 0      | 1.130212                | 1.828155  | 1.313916  |
| 25         | 1      | 0      | 2.077528                | 2.325874  | -0.076922 |
| 26         | 1      | 0      | 0.074317                | 2.707424  | -1.407378 |
| 27         | 1      | 0      | 0.109639                | 3.666931  | 0.066875  |
| 28         | 1      | 0      | -3.856564               | 1.148143  | 0.110696  |
| 29         | 1      | 0      | -3.897518               | 1.270601  | -1.633683 |
| 30         | 1      | 0      | -3.454117               | -1.133846 | -1.871889 |
| 31         | 1      | 0      | -4.54236                | -1.098113 | -0.472271 |
| 32         | 1      | 0      | -3.558358               | -1.632357 | 1.767896  |
| 33         | 1      | 0      | -1.806774               | -1.541704 | 2.04224   |
| 34         | 1      | 0      | -2.735087               | -0.064229 | 1.76058   |
| 35         | 1      | 0      | -3.006952               | 2.330487  | 1.410163  |
| 36         | 1      | 0      | -1.590006               | 3.478106  | 1.651     |
| 37         | 1      | 0      | 2.144682                | -1.214659 | 1.965729  |
| 38         | 1      | 0      | 2.756093                | 0.447772  | 2.105712  |

|            |   |   |           |           |           |
|------------|---|---|-----------|-----------|-----------|
| 39         | 1 | 0 | 3.865863  | -0.867217 | 1.698788  |
| 40         | 1 | 0 | 3.462085  | 0.900776  | -1.541431 |
| 41         | 1 | 0 | 3.935864  | 1.460053  | 0.082196  |
| 42         | 1 | 0 | 4.731003  | -1.026409 | -0.879957 |
| 43         | 1 | 0 | 2.023719  | -2.072878 | -0.357499 |
| 44         | 1 | 0 | -0.349035 | -2.406845 | 0.238979  |
| 45         | 1 | 0 | -2.772916 | -3.202875 | 0.044526  |
| <b>11B</b> |   |   |           |           |           |
| 1          | 6 | 0 | 1.78499   | 1.217256  | 0.604869  |
| 2          | 6 | 0 | 1.360128  | 0.298907  | 0.649199  |
| 3          | 6 | 0 | 0.028651  | 0.634539  | 0.022893  |
| 4          | 6 | 0 | 1.209665  | 0.121451  | 0.730773  |
| 5          | 6 | 0 | 1.016209  | 1.296256  | 1.300089  |
| 6          | 6 | 0 | 0.471021  | 2.379121  | 0.361469  |
| 7          | 6 | 0 | 0.8725    | 2.057579  | 0.267156  |
| 8          | 6 | 0 | 3.294643  | 1.217298  | 0.261276  |
| 9          | 6 | 0 | 3.750399  | 0.218987  | 0.528118  |
| 10         | 6 | 0 | 2.563684  | 1.04923   | 0.036358  |
| 11         | 1 | 0 | 1.682654  | 1.608538  | 1.621022  |
| 12         | 6 | 0 | 2.52587   | 1.119456  | 1.491177  |
| 13         | 1 | 0 | 1.313264  | 0.623002  | 1.696432  |
| 14         | 6 | 0 | 1.175923  | 2.513252  | 1.480886  |
| 15         | 6 | 0 | 2.501984  | 0.356973  | 0.099925  |
| 16         | 6 | 0 | 2.38637   | 0.041749  | 1.573007  |
| 17         | 6 | 0 | 3.704827  | 0.344084  | 0.543974  |
| 18         | 8 | 0 | 4.916068  | 0.109365  | 0.012402  |
| 19         | 8 | 0 | 2.85635   | 1.741614  | 0.025717  |
| 20         | 1 | 0 | 1.325056  | 0.780526  | 1.600396  |
| 21         | 8 | 0 | 0.131292  | 2.050105  | 0.193762  |
| 22         | 8 | 0 | 2.547988  | 2.373561  | 0.583969  |
| 23         | 1 | 0 | 0.050745  | 0.196943  | 1.024839  |
| 24         | 1 | 0 | 1.952612  | 1.650899  | 1.733777  |
| 25         | 1 | 0 | 0.334555  | 1.206327  | 2.150698  |
| 26         | 1 | 0 | 0.34147   | 3.288856  | 0.961106  |
| 27         | 1 | 0 | 1.193259  | 2.630134  | 0.418765  |
| 28         | 1 | 0 | 3.469524  | 1.466648  | 0.784948  |
| 29         | 1 | 0 | 3.83629   | 1.952828  | 0.856519  |
| 30         | 1 | 0 | 3.871622  | 0.399394  | 1.600384  |
| 31         | 1 | 0 | 4.686061  | 0.478586  | 0.026028  |
| 32         | 1 | 0 | 3.468514  | 1.529619  | 1.867103  |
| 33         | 1 | 0 | 1.705544  | 1.754446  | 1.827405  |
| 34         | 1 | 0 | 2.389712  | 0.129374  | 1.930586  |
| 35         | 1 | 0 | 2.136667  | 2.353763  | 1.953519  |

|            |   |   |           |           |           |
|------------|---|---|-----------|-----------|-----------|
| 36         | 1 | 0 | 0.450269  | 3.086853  | 2.047865  |
| 37         | 1 | 0 | 1.968388  | 1.044635  | 1.692208  |
| 38         | 1 | 0 | 3.379189  | 0.017652  | 2.024416  |
| 39         | 1 | 0 | 1.74988   | 0.663563  | 2.111052  |
| 40         | 1 | 0 | 3.683513  | 0.158669  | 1.627088  |
| 41         | 1 | 0 | 3.660872  | 1.421903  | 0.370504  |
| 42         | 1 | 0 | 4.850619  | 1.071397  | 0.044623  |
| 43         | 1 | 0 | 2.053466  | 2.25869   | 0.175508  |
| 44         | 1 | 0 | 0.629079  | 2.515353  | 0.179723  |
| 45         | 1 | 0 | 3.248421  | 2.891954  | 0.175974  |
| <b>11C</b> |   |   |           |           |           |
| 1          | 6 | 0 | -1.875158 | 1.001962  | -0.820671 |
| 2          | 6 | 0 | -1.228331 | -0.398633 | -0.542473 |
| 3          | 6 | 0 | 0.035663  | -0.463117 | 0.323625  |
| 4          | 6 | 0 | 1.225077  | 0.349467  | -0.257825 |
| 5          | 6 | 0 | 1.163065  | 1.80959   | 0.220003  |
| 6          | 6 | 0 | -0.002971 | 2.649766  | -0.3151   |
| 7          | 6 | 0 | -1.369115 | 2.127716  | 0.059435  |
| 8          | 6 | 0 | -3.406683 | 0.761925  | -0.804612 |
| 9          | 6 | 0 | -3.57579  | -0.756172 | -0.853453 |
| 10         | 6 | 0 | -2.399697 | -1.265672 | -0.021804 |
| 11         | 1 | 0 | -1.589028 | 1.278852  | -1.839383 |
| 12         | 6 | 0 | -2.639178 | -1.113808 | 1.478411  |
| 13         | 1 | 0 | -0.955496 | -0.841617 | -1.508203 |
| 14         | 6 | 0 | -2.028478 | 2.660876  | 1.087245  |
| 15         | 6 | 0 | 2.611864  | -0.278176 | 0.059991  |
| 16         | 6 | 0 | 2.851442  | -0.492269 | 1.555948  |
| 17         | 6 | 0 | 3.749575  | 0.577338  | -0.530521 |
| 18         | 8 | 0 | 4.957512  | -0.144241 | -0.562114 |
| 19         | 8 | 0 | 2.75176   | -1.508275 | -0.648846 |
| 20         | 1 | 0 | 1.15064   | 0.329096  | -1.35417  |
| 21         | 8 | 0 | 0.400692  | -1.841225 | 0.474088  |
| 22         | 8 | 0 | -2.088948 | -2.634632 | -0.32186  |
| 23         | 1 | 0 | -0.182644 | -0.068113 | 1.325174  |
| 24         | 1 | 0 | 1.129733  | 1.827775  | 1.31475   |
| 25         | 1 | 0 | 2.077576  | 2.325893  | -0.075581 |
| 26         | 1 | 0 | 0.074849  | 2.707707  | -1.406729 |
| 27         | 1 | 0 | 0.109504  | 3.666917  | 0.067765  |
| 28         | 1 | 0 | -3.856606 | 1.148429  | 0.109156  |
| 29         | 1 | 0 | -3.896637 | 1.270264  | -1.635269 |
| 30         | 1 | 0 | -3.453127 | -1.134244 | -1.872412 |
| 31         | 1 | 0 | -4.542231 | -1.097997 | -0.473455 |
| 32         | 1 | 0 | -3.558979 | -1.631728 | 1.767646  |

|    |   |   |           |           |           |
|----|---|---|-----------|-----------|-----------|
| 33 | 1 | 0 | -1.80752  | -1.540765 | 2.042525  |
| 34 | 1 | 0 | -2.73597  | -0.063482 | 1.760135  |
| 35 | 1 | 0 | -3.007317 | 2.329916  | 1.409833  |
| 36 | 1 | 0 | -1.590561 | 3.47763   | 1.651188  |
| 37 | 1 | 0 | 2.145201  | -1.214817 | 1.96572   |
| 38 | 1 | 0 | 2.756619  | 0.447632  | 2.105679  |
| 39 | 1 | 0 | 3.866317  | -0.867309 | 1.698369  |
| 40 | 1 | 0 | 3.461661  | 0.900801  | -1.54166  |
| 41 | 1 | 0 | 3.935927  | 1.460026  | 0.081836  |
| 42 | 1 | 0 | 4.730757  | -1.026388 | -0.880664 |
| 43 | 1 | 0 | 2.02336   | -2.072719 | -0.357709 |
| 44 | 1 | 0 | -0.349127 | -2.40685  | 0.239983  |
| 45 | 1 | 0 | -2.772743 | -3.202688 | 0.046126  |

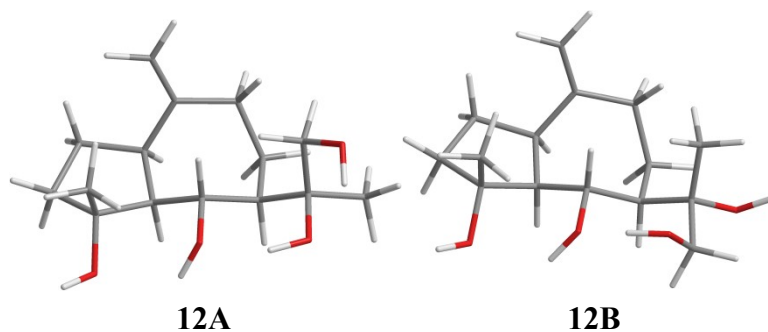

**Figure S118.** Conformers of isomer **12**

**Table S19.** Important thermodynamic parameters and Boltzmann distributions of the optimized isomer **12** at B3LYP/6-31G (d, p) level in gas phase.

| Conformations | Energy (a.u) | $\Delta G$ (kcal/mol) | %    | Number of imaginary frequencies |
|---------------|--------------|-----------------------|------|---------------------------------|
| 12A           | -887.656212  | 0.00                  | 85.0 | 0                               |
| 12B           | -887.654577  | 1.03                  | 15.0 | 0                               |

**Table S20.** Optimized Z-matrixes of isomer **12** in the gas phase ( $\text{\AA}$ ) at B3LYP/6-31G (d) level.

| Center Number | Atomic Number | Atomic Type | Coordinates(Angstroms) |          |          |
|---------------|---------------|-------------|------------------------|----------|----------|
|               |               |             | X                      | Y        | Z        |
| <b>12A</b>    |               |             |                        |          |          |
| 1             | 6             | 0           | 1.697969               | 1.26484  | 0.571604 |
| 2             | 6             | 0           | 1.388284               | 0.275222 | 0.617047 |
| 3             | 6             | 0           | 0.027417               | 0.729031 | 0.080927 |
| 4             | 6             | 0           | 1.182114               | 0.292149 | 0.937832 |
| 5             | 6             | 0           | 1.028323               | 1.100054 | 1.58523  |
| 6             | 6             | 0           | 0.610184               | 2.291772 | 0.704689 |
| 7             | 6             | 0           | 0.620768               | 2.053069 | 0.138516 |

|            |   |   |          |          |          |
|------------|---|---|----------|----------|----------|
| 8          | 6 | 0 | 3.142072 | 1.390211 | 0.033986 |
| 9          | 6 | 0 | 3.743302 | 0.000723 | 0.237465 |
| 10         | 6 | 0 | 2.582436 | 0.930155 | 0.119738 |
| 11         | 6 | 0 | 2.38574  | 1.026809 | 1.632797 |
| 12         | 6 | 0 | 0.698777 | 2.513615 | 1.38533  |
| 13         | 6 | 0 | 2.538109 | 0.50419  | 0.208231 |
| 14         | 6 | 0 | 3.67563  | 0.665559 | 1.216926 |
| 15         | 6 | 0 | 2.865876 | 0.629151 | 0.777603 |
| 16         | 8 | 0 | 3.936557 | 0.268811 | 1.619604 |
| 17         | 8 | 0 | 2.523667 | 1.678835 | 0.60867  |
| 18         | 8 | 0 | 0.007386 | 2.163746 | 0.027348 |
| 19         | 8 | 0 | 2.743143 | 2.244088 | 0.432314 |
| 20         | 1 | 0 | 1.703691 | 1.617875 | 1.607533 |
| 21         | 1 | 0 | 1.464095 | 0.617736 | 1.656825 |
| 22         | 1 | 0 | 0.093779 | 0.363438 | 0.944358 |
| 23         | 1 | 0 | 1.184954 | 1.004929 | 1.772283 |
| 24         | 1 | 0 | 1.96059  | 1.361821 | 2.091594 |
| 25         | 1 | 0 | 0.290003 | 0.998491 | 2.386325 |
| 26         | 1 | 0 | 0.382412 | 3.120045 | 1.388136 |
| 27         | 1 | 0 | 1.425181 | 2.636421 | 0.069499 |
| 28         | 1 | 0 | 3.154966 | 1.64418  | 1.025911 |
| 29         | 1 | 0 | 3.692608 | 2.174027 | 0.554842 |
| 30         | 1 | 0 | 3.999831 | 0.165655 | 1.288278 |
| 31         | 1 | 0 | 4.633993 | 0.18502  | 0.368778 |
| 32         | 1 | 0 | 3.31325  | 1.361973 | 2.10755  |
| 33         | 1 | 0 | 2.11867  | 0.058515 | 2.060766 |
| 34         | 1 | 0 | 1.591001 | 1.733862 | 1.874044 |
| 35         | 1 | 0 | 1.578838 | 2.399038 | 2.005744 |
| 36         | 1 | 0 | 0.138953 | 3.040913 | 1.829151 |
| 37         | 1 | 0 | 3.762462 | 0.197073 | 1.881349 |
| 38         | 1 | 0 | 3.508326 | 1.56065  | 1.819734 |
| 39         | 1 | 0 | 4.617131 | 0.779068 | 0.677901 |
| 40         | 1 | 0 | 1.972932 | 0.872484 | 1.370831 |
| 41         | 1 | 0 | 3.18265  | 1.523192 | 0.236263 |
| 42         | 1 | 0 | 3.756075 | 0.635949 | 1.902723 |
| 43         | 1 | 0 | 1.770876 | 2.241734 | 0.384341 |
| 44         | 1 | 0 | 0.846764 | 2.53555  | 0.284764 |
| 45         | 1 | 0 | 3.425182 | 2.711873 | 0.05942  |
| <b>12B</b> |   |   |          |          |          |
| 1          | 6 | 0 | 1.71068  | 1.30016  | 0.429218 |
| 2          | 6 | 0 | 1.247459 | 0.179489 | 0.688288 |
| 3          | 6 | 0 | 0.134469 | 0.584471 | 0.158948 |
| 4          | 6 | 0 | 1.320318 | 0.097868 | 0.872258 |

|    |   |   |          |          |          |
|----|---|---|----------|----------|----------|
| 5  | 6 | 0 | 1.044305 | 1.548138 | 1.318072 |
| 6  | 6 | 0 | 0.480623 | 2.5471   | 0.292554 |
| 7  | 6 | 0 | 0.7453   | 2.066135 | 0.446196 |
| 8  | 6 | 0 | 3.179731 | 1.209711 | 0.043378 |
| 9  | 6 | 0 | 3.631482 | 0.183593 | 0.393703 |
| 10 | 6 | 0 | 2.398404 | 1.044455 | 0.116366 |
| 11 | 6 | 0 | 2.251529 | 1.346503 | 1.375405 |
| 12 | 6 | 0 | 0.912672 | 2.31346  | 1.743987 |
| 13 | 6 | 0 | 2.672808 | 0.053123 | 0.129678 |
| 14 | 6 | 0 | 2.791003 | 0.788931 | 1.141673 |
| 15 | 6 | 0 | 3.035622 | 1.515715 | 0.195337 |
| 16 | 8 | 0 | 2.387759 | 2.034215 | 1.333785 |
| 17 | 8 | 0 | 3.634331 | 0.390385 | 1.096314 |
| 18 | 8 | 0 | 0.295336 | 2.004361 | 0.313113 |
| 19 | 8 | 0 | 2.411778 | 2.271173 | 0.859708 |
| 20 | 1 | 0 | 1.710511 | 1.805782 | 1.399573 |
| 21 | 1 | 0 | 1.25297  | 0.363764 | 1.769821 |
| 22 | 1 | 0 | 0.172912 | 0.36806  | 0.914464 |
| 23 | 1 | 0 | 1.456549 | 0.47389  | 1.798137 |
| 24 | 1 | 0 | 1.972561 | 1.950781 | 1.726979 |
| 25 | 1 | 0 | 0.347427 | 1.498324 | 2.160488 |
| 26 | 1 | 0 | 0.191588 | 3.445397 | 0.853786 |
| 27 | 1 | 0 | 1.235152 | 2.86589  | 0.425092 |
| 28 | 1 | 0 | 3.259641 | 1.299277 | 1.126789 |
| 29 | 1 | 0 | 3.78418  | 2.009085 | 0.386111 |
| 30 | 1 | 0 | 3.829301 | 0.210607 | 1.469507 |
| 31 | 1 | 0 | 4.522044 | 0.540073 | 0.130542 |
| 32 | 1 | 0 | 3.160497 | 1.828775 | 1.748597 |
| 33 | 1 | 0 | 2.093249 | 0.432713 | 1.951354 |
| 34 | 1 | 0 | 1.404117 | 2.009394 | 1.554571 |
| 35 | 1 | 0 | 1.796568 | 2.018163 | 2.295674 |
| 36 | 1 | 0 | 0.148997 | 2.842919 | 2.303753 |
| 37 | 1 | 0 | 1.911595 | 0.695348 | 1.781211 |
| 38 | 1 | 0 | 2.937687 | 1.836592 | 0.879125 |
| 39 | 1 | 0 | 3.652969 | 0.456715 | 1.727763 |
| 40 | 1 | 0 | 4.109469 | 1.532457 | 0.415073 |
| 41 | 1 | 0 | 2.861819 | 2.136782 | 0.688752 |
| 42 | 1 | 0 | 1.534532 | 2.36691  | 1.027262 |
| 43 | 1 | 0 | 4.504899 | 0.370258 | 0.688183 |
| 44 | 1 | 0 | 0.517077 | 2.396914 | 0.660019 |
| 45 | 1 | 0 | 3.066543 | 2.864207 | 0.47846  |

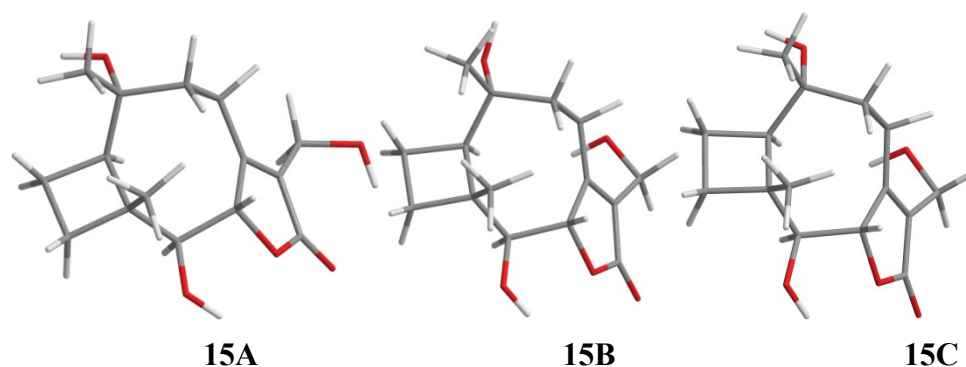

**Figure S119.** Conformers of isomer **15**

**Table S21.** Important thermodynamic parameters and Boltzmann distributions of the optimized isomer **15** at B3LYP/6-31G (d, p) level in gas phase.

| Conformations | Energy (a.u) | $\Delta G(\text{kcal/mol})$ | %    | Number of imaginary frequencies |
|---------------|--------------|-----------------------------|------|---------------------------------|
| 15A           | -960.528658  | 0.00                        | 57.2 | 0                               |
| 15B           | -960.527589  | 0.67                        | 18.5 | 0                               |
| 15C           | -960.527849  | 0.51                        | 24.3 | 0                               |

**Table S22.** Optimized Z-matrixes of isomer **15** in the gas phase ( $\text{\AA}$ ) at B3LYP/6-31G (d) level.

| Center Number | Atomic Number | Atomic Type | Coordinates (Angstroms) |          |          |
|---------------|---------------|-------------|-------------------------|----------|----------|
|               |               |             | X                       | Y        | Z        |
| <b>15A</b>    |               |             |                         |          |          |
| 1             | 6             | 0           | 2.075908                | 0.200364 | 0.653288 |
| 2             | 6             | 0           | 1.666794                | 1.190969 | 0.076713 |
| 3             | 6             | 0           | 0.200706                | 1.579367 | 0.250909 |
| 4             | 6             | 0           | 0.810389                | 0.816821 | 0.633782 |
| 5             | 6             | 0           | 1.21447                 | 0.564878 | 0.158963 |
| 6             | 6             | 0           | 0.351251                | 1.793227 | 0.119373 |
| 7             | 6             | 0           | 0.928831                | 1.778552 | 0.965446 |
| 8             | 6             | 0           | 2.206565                | 1.483828 | 0.175643 |
| 9             | 6             | 0           | 3.315979                | 0.464969 | 1.29617  |
| 10            | 6             | 0           | 2.58424                 | 1.818648 | 1.164008 |
| 11            | 8             | 0           | 2.032147                | 1.578795 | 0.576262 |
| 12            | 6             | 0           | 3.026469                | 0.821355 | 0.065238 |
| 13            | 6             | 0           | 2.508508                | 0.527061 | 0.189191 |
| 14            | 8             | 0           | 4.142482                | 1.248852 | 0.10464  |
| 15            | 6             | 0           | 3.419165                | 1.58099  | 0.73962  |
| 16            | 8             | 0           | 2.330233                | 2.577671 | 0.751795 |
| 17            | 6             | 0           | 2.192627                | 1.529742 | 1.31735  |
| 18            | 8             | 0           | 0.116083                | 2.964348 | 0.033051 |
| 19            | 6             | 0           | 3.407299                | 1.525112 | 1.118033 |
| 20            | 8             | 0           | 4.633379                | 1.659638 | 0.007872 |

|            |   |   |           |           |           |
|------------|---|---|-----------|-----------|-----------|
| 21         | 1 | 0 | 1.371489  | 0.428863  | 1.461231  |
| 22         | 1 | 0 | 0.090312  | 1.399101  | 1.29574   |
| 23         | 1 | 0 | 0.488242  | 0.816639  | 1.678366  |
| 24         | 1 | 0 | 0.093726  | 2.016215  | 0.92125   |
| 25         | 1 | 0 | 0.98411   | 2.62389   | 0.440941  |
| 26         | 1 | 0 | 0.845439  | 1.073682  | 1.796079  |
| 27         | 1 | 0 | 1.060073  | 2.765123  | 1.415921  |
| 28         | 1 | 0 | 3.599016  | 0.138705  | 2.296783  |
| 29         | 1 | 0 | 4.190478  | 0.424544  | 0.645702  |
| 30         | 1 | 0 | 3.172669  | 2.684161  | 0.857741  |
| 31         | 1 | 0 | 2.020719  | 2.064159  | 2.066375  |
| 32         | 1 | 0 | 3.62272   | 1.366156  | 1.795092  |
| 33         | 1 | 0 | 2.948449  | 2.562203  | 0.684935  |
| 34         | 1 | 0 | 3.0983    | 2.413959  | 1.309956  |
| 35         | 1 | 0 | 1.74688   | 0.9216    | 2.107989  |
| 36         | 1 | 0 | 3.274759  | 1.392972  | 1.360656  |
| 37         | 1 | 0 | 1.979785  | 2.577591  | 1.533847  |
| 38         | 1 | 0 | 0.802412  | 3.23596   | 0.069072  |
| 39         | 1 | 0 | 3.352336  | 0.756799  | 1.8887    |
| 40         | 1 | 0 | 3.433322  | 2.5012    | 1.607013  |
| 41         | 1 | 0 | 4.342427  | 1.398273  | 0.568253  |
| 42         | 1 | 0 | 5.056367  | 0.793707  | 0.057516  |
| <b>15B</b> |   |   |           |           |           |
| 1          | 6 | 0 | 1.9471    | 0.205792  | 0.65214   |
| 2          | 6 | 0 | 1.543825  | -1.232902 | 0.20156   |
| 3          | 6 | 0 | 0.066057  | -1.59194  | 0.338268  |
| 4          | 6 | 0 | -0.884609 | -0.932172 | -0.683205 |
| 5          | 6 | 0 | -1.291811 | 0.495464  | -0.395638 |
| 6          | 6 | 0 | -0.418771 | 1.712824  | -0.432942 |
| 7          | 6 | 0 | 0.905069  | 1.59749   | -1.197767 |
| 8          | 6 | 0 | 2.135161  | 1.389648  | -0.299543 |
| 9          | 6 | 0 | 3.140294  | -0.400616 | 1.421572  |
| 10         | 6 | 0 | 2.395673  | -1.753492 | 1.394416  |
| 11         | 8 | 0 | -2.11928  | -1.667559 | -0.611886 |
| 12         | 6 | 0 | -3.139841 | -0.844118 | -0.26309  |
| 13         | 6 | 0 | -2.607723 | 0.518927  | -0.136387 |
| 14         | 8 | 0 | -4.262881 | -1.251603 | -0.118869 |
| 15         | 6 | 0 | -3.464803 | 1.696968  | 0.21416   |
| 16         | 8 | 0 | 2.25302   | 2.509594  | 0.59527   |
| 17         | 6 | 0 | 2.138182  | -1.72056  | -1.119521 |
| 18         | 8 | 0 | -0.019553 | -3.000281 | 0.210915  |
| 19         | 6 | 0 | 3.391472  | 1.329497  | -1.164626 |
| 20         | 8 | 0 | -2.979554 | 2.412657  | 1.341973  |

|            |   |   |           |           |           |
|------------|---|---|-----------|-----------|-----------|
| 21         | 1 | 0 | 1.208318  | 0.526753  | 1.39517   |
| 22         | 1 | 0 | -0.278494 | -1.291396 | 1.338239  |
| 23         | 1 | 0 | -0.501125 | -1.052816 | -1.700178 |
| 24         | 1 | 0 | -0.221212 | 2.035792  | 0.594488  |
| 25         | 1 | 0 | -1.029306 | 2.514101  | -0.859511 |
| 26         | 1 | 0 | 0.859691  | 0.805773  | -1.950076 |
| 27         | 1 | 0 | 1.068449  | 2.524908  | -1.754523 |
| 28         | 1 | 0 | 3.375871  | 0.031039  | 2.393441  |
| 29         | 1 | 0 | 4.047365  | -0.437022 | 0.817442  |
| 30         | 1 | 0 | 2.98295   | -2.653704 | 1.209773  |
| 31         | 1 | 0 | 1.782863  | -1.897362 | 2.286709  |
| 32         | 1 | 0 | -3.470838 | 2.41248   | -0.611244 |
| 33         | 1 | 0 | -4.492003 | 1.356719  | 0.373056  |
| 34         | 1 | 0 | 2.480921  | 3.289987  | 0.07793   |
| 35         | 1 | 0 | 1.745441  | -1.195003 | -1.992872 |
| 36         | 1 | 0 | 3.223021  | -1.598648 | -1.117214 |
| 37         | 1 | 0 | 1.922063  | -2.783397 | -1.237824 |
| 38         | 1 | 0 | -0.947367 | -3.250004 | 0.280273  |
| 39         | 1 | 0 | 3.365552  | 0.497117  | -1.867116 |
| 40         | 1 | 0 | 3.470966  | 2.251822  | -1.747938 |
| 41         | 1 | 0 | 4.284848  | 1.244088  | -0.545083 |
| 42         | 1 | 0 | -2.983648 | 1.821467  | 2.101448  |
| <b>15C</b> |   |   |           |           |           |
| 1          | 6 | 0 | 1.941591  | 0.211797  | 0.640821  |
| 2          | 6 | 0 | 1.546292  | 1.23365   | 0.203668  |
| 3          | 6 | 0 | 0.068318  | 1.590736  | 0.342585  |
| 4          | 6 | 0 | 0.881367  | 0.931018  | 0.68062   |
| 5          | 6 | 0 | 1.291656  | 0.49635   | 0.393756  |
| 6          | 6 | 0 | 0.42337   | 1.71766   | 0.43236   |
| 7          | 6 | 0 | 0.899054  | 1.610473  | 1.201975  |
| 8          | 6 | 0 | 2.129755  | 1.395282  | 0.317084  |
| 9          | 6 | 0 | 3.139102  | 0.384503  | 1.418425  |
| 10         | 6 | 0 | 2.398425  | 1.739737  | 1.401704  |
| 11         | 8 | 0 | 2.114902  | 1.668467  | 0.611114  |
| 12         | 6 | 0 | 3.137284  | 0.847181  | 0.262457  |
| 13         | 6 | 0 | 2.607867  | 0.516787  | 0.135302  |
| 14         | 8 | 0 | 4.259539  | 1.257008  | 0.119089  |
| 15         | 6 | 0 | 3.46792   | 1.693068  | 0.214001  |
| 16         | 8 | 0 | 2.217526  | 2.584179  | 0.489915  |
| 17         | 6 | 0 | 2.140083  | 1.730428  | 1.113772  |
| 18         | 8 | 0 | 0.019536  | 2.999069  | 0.219771  |
| 19         | 6 | 0 | 3.379542  | 1.324253  | 1.191325  |
| 20         | 8 | 0 | 2.986177  | 2.409443  | 1.342869  |

|    |   |   |          |          |          |
|----|---|---|----------|----------|----------|
| 21 | 1 | 0 | 1.199338 | 0.532612 | 1.380386 |
| 22 | 1 | 0 | 0.275442 | 1.286692 | 1.341767 |
| 23 | 1 | 0 | 0.496256 | 1.050901 | 1.697045 |
| 24 | 1 | 0 | 0.226911 | 2.041944 | 0.594454 |
| 25 | 1 | 0 | 1.037969 | 2.515814 | 0.858924 |
| 26 | 1 | 0 | 0.853756 | 0.822269 | 1.957429 |
| 27 | 1 | 0 | 1.064503 | 2.543609 | 1.745576 |
| 28 | 1 | 0 | 3.374662 | 0.051053 | 2.389332 |
| 29 | 1 | 0 | 4.046243 | 0.423677 | 0.814172 |
| 30 | 1 | 0 | 2.990961 | 2.638375 | 1.226848 |
| 31 | 1 | 0 | 1.785782 | 1.877318 | 2.29497  |
| 32 | 1 | 0 | 3.47399  | 2.408726 | 0.611277 |
| 33 | 1 | 0 | 4.494685 | 1.350699 | 0.371048 |
| 34 | 1 | 0 | 2.956821 | 2.480896 | 1.099019 |
| 35 | 1 | 0 | 1.747013 | 1.209222 | 1.989692 |
| 36 | 1 | 0 | 3.225025 | 1.609723 | 1.113    |
| 37 | 1 | 0 | 1.922628 | 2.793677 | 1.225328 |
| 38 | 1 | 0 | 0.947984 | 3.246996 | 0.287475 |
| 39 | 1 | 0 | 3.358545 | 0.472497 | 1.870467 |
| 40 | 1 | 0 | 3.442018 | 2.237539 | 1.786748 |
| 41 | 1 | 0 | 4.282562 | 1.25739  | 0.580568 |
| 42 | 1 | 0 | 2.991783 | 1.818409 | 2.102443 |

**Table S23.** Energy analysis for (1*R*, 4*R*, 5*S*, 6*R*, 7*R*, 10*S*, 11*R*<sup>\*</sup>)-**8a** and (1*R*, 4*R*, 5*S*, 6*R*, 7*R*, 10*S*, 11*S*<sup>\*</sup>)-**8b**

| Conf. | G(Hartree) | $\Delta G(\text{kcal/mol})$ | Boltzmann Distribution |
|-------|------------|-----------------------------|------------------------|
| a     |            |                             |                        |
| a1    | 0.395359   | 0.00                        | 0.855                  |
| a2    | 0.39487    | -0.31                       | 0.103                  |
| b     |            |                             |                        |
| b1    | 0.393838   | 0.00                        | 0.565                  |
| b2    | 0.393807   | 0.46                        | 0.365                  |

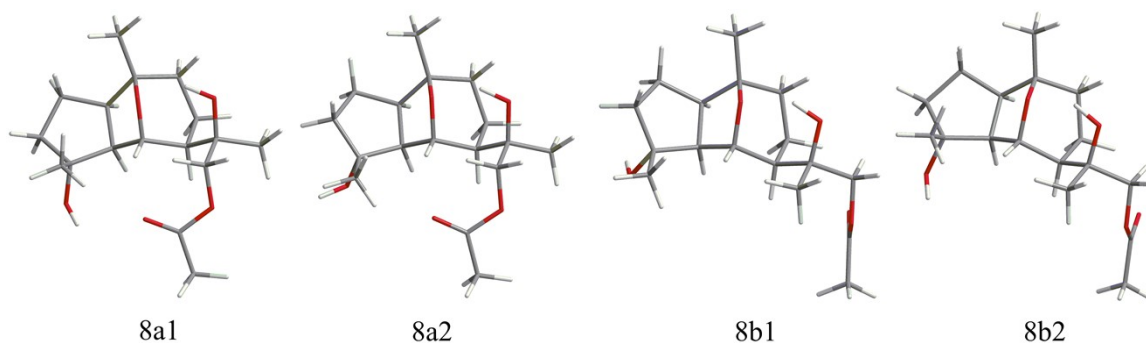

**Figure S120.** mPW1PW91/6-311+G (d, p) (chloroform) optimized lowest energy conformers for (1*R*, 4*R*, 5*S*, 6*R*, 7*R*, 10*S*, 11*R*<sup>\*</sup>)-**8a** and (1*R*, 4*R*, 5*S*, 6*R*, 7*R*, 10*S*, 11*S*<sup>\*</sup>)-**8b**

| Functional |      | Solvent?     |          | Basis Set    |          | Type of Data    |          |
|------------|------|--------------|----------|--------------|----------|-----------------|----------|
| mPW1PW91   |      | PCI          |          | 6-311+G(d,p) |          | Unscaled Shifts |          |
|            |      | DP4+         | 0.00%    | 100.00%      | -        | -               | -        |
| Nuclei     | sp2? | Experimental | Isomer 1 | Isomer 2     | Isomer 3 | Isomer 4        | Isomer 5 |
| C          |      | 50.1         | 54.36    | 54.54        |          |                 |          |
| C          |      | 26.1         | 29.67    | 29.19        |          |                 |          |
| C          |      | 42.0         | 45.12    | 44.52        |          |                 |          |
| C          |      | 81.9         | 83.64    | 84.58        |          |                 |          |
| C          |      | 58.0         | 66.25    | 65.91        |          |                 |          |
| C          |      | 77.4         | 82.81    | 81.83        |          |                 |          |
| C          |      | 45.1         | 39.85    | 43.20        |          |                 |          |
| C          |      | 18.2         | 22.59    | 21.97        |          |                 |          |
| C          |      | 38.1         | 38.65    | 39.53        |          |                 |          |
| C          |      | 81.8         | 86.42    | 86.37        |          |                 |          |
| C          |      | 72.2         | 77.86    | 78.40        |          |                 |          |
| C          |      | 70.0         | 74.09    | 71.01        |          |                 |          |
| C          |      | 23.7         | 26.69    | 29.06        |          |                 |          |
| C          |      | 22.7         | 25.15    | 24.65        |          |                 |          |
| C          |      | 25.0         | 26.28    | 25.50        |          |                 |          |
| C          |      | 171.4        | 177.69   | 177.58       |          |                 |          |
| C          |      | 21.1         | 23.86    | 23.32        |          |                 |          |
| H          |      | 2.45         | 2.62     | 2.59         |          |                 |          |
| H          |      | 1.79         | 1.77     | 1.88         |          |                 |          |
| H          |      | 1.64         | 1.58     | 1.63         |          |                 |          |
| H          |      | 1.58         | 1.81     | 1.63         |          |                 |          |
| H          |      | 1.53         | 1.56     | 1.50         |          |                 |          |
| H          |      | 2.78         | 2.19     | 2.22         |          |                 |          |
| H          |      | 4.26         | 5.29     | 4.60         |          |                 |          |
| H          |      | 1.70         | 0.74     | 0.81         |          |                 |          |
| H          |      | 1.73         | 1.86     | 2.33         |          |                 |          |
| H          |      | 1.58         | 1.81     | 1.69         |          |                 |          |
| H          |      | 1.51         | 1.76     | 1.97         |          |                 |          |
| H          |      | 1.48         | 1.32     | 1.28         |          |                 |          |
| H          |      | 3.98         | 5.10     | 5.13         |          |                 |          |
| H          |      | 3.89         | 3.37     | 3.23         |          |                 |          |
| H          |      | 1.27         | 1.14     | 1.35         |          |                 |          |
| H          |      | 1.27         | 1.48     | 1.50         |          |                 |          |
| H          |      | 1.27         | 1.18     | 1.36         |          |                 |          |
| H          |      | 1.18         | 1.09     | 1.14         |          |                 |          |
| H          |      | 1.18         | 1.28     | 1.27         |          |                 |          |
| H          |      | 1.18         | 1.15     | 1.19         |          |                 |          |
| H          |      | 1.36         | 1.77     | 1.29         |          |                 |          |
| H          |      | 1.36         | 1.65     | 1.28         |          |                 |          |
| H          |      | 1.36         | 1.13     | 1.36         |          |                 |          |
| H          |      | 2.08         | 1.72     | 2.04         |          |                 |          |
| H          |      | 2.08         | 2.14     | 1.83         |          |                 |          |
| H          |      | 2.08         | 2.22     | 2.18         |          |                 |          |

| Functional       | Solvent? |          | Basis Set    |          | Type of Data    |          |
|------------------|----------|----------|--------------|----------|-----------------|----------|
| mPW1PW91         | PCI      |          | 6-311+G(d,p) |          | Unscaled Shifts |          |
|                  | Isomer 1 | Isomer 2 | Isomer 3     | Isomer 4 | Isomer 5        | Isomer 6 |
| sDP4+ (H data)   | 1.76%    | 98.24%   | -            | -        | -               | -        |
| sDP4+ (C data)   | 36.82%   | 63.18%   | -            | -        | -               | -        |
| sDP4+ (all data) | 1.03%    | 98.97%   | -            | -        | -               | -        |
| uDP4+ (H data)   | 0.06%    | 99.94%   | -            | -        | -               | -        |
| uDP4+ (C data)   | 31.28%   | 68.72%   | -            | -        | -               | -        |
| uDP4+ (all data) | 0.03%    | 99.97%   | -            | -        | -               | -        |
| DP4+ (H data)    | 0.00%    | 100.00%  | -            | -        | -               | -        |
| DP4+ (C data)    | 20.97%   | 79.03%   | -            | -        | -               | -        |
| DP4+ (all data)  | 0.00%    | 100.00%  | -            | -        | -               | -        |

**Figure S121.** DP4+ evaluation of theoretical and experimental data for (1*R*, 4*R*, 5*S*, 6*R*, 7*R*, 10*S*, 11*R*<sup>\*</sup>)-**8a** and (1*R*, 4*R*, 5*S*, 6*R*, 7*R*, 10*S*, 11*S*<sup>\*</sup>)-**8b**

**Table S24.** Calculated (calc.) and experimental (exp.)  $^{13}\text{C}$  NMR chemical shift values of (1*R*, 4*R*, 5*S*, 6*R*, 7*R*, 10*S*, 11*R*\*)-8a and (1*R*, 4*R*, 5*S*, 6*R*, 7*R*, 10*S*, 11*S*\*)-8b at the mPW1PW91/6-311+G(d, p) level in chloroform

| Position | exp.  | calc.a | calc. b |
|----------|-------|--------|---------|
| 1        | 50.1  | 54.36  | 54.54   |
| 2        | 26.1  | 29.67  | 29.19   |
| 3        | 42.0  | 45.12  | 44.52   |
| 4        | 81.9  | 83.64  | 84.58   |
| 5        | 58.0  | 66.25  | 65.91   |
| 6        | 77.4  | 82.81  | 81.83   |
| 7        | 45.1  | 39.85  | 43.20   |
| 8        | 18.2  | 22.59  | 21.97   |
| 9        | 38.1  | 38.65  | 39.53   |
| 10       | 81.8  | 86.42  | 86.37   |
| 11       | 72.2  | 77.86  | 78.40   |
| 12       | 70.0  | 74.09  | 71.01   |
| 13       | 23.7  | 26.69  | 29.06   |
| 14       | 22.7  | 25.15  | 24.65   |
| 15       | 25.0  | 26.28  | 25.50   |
| 16       | 171.4 | 177.69 | 177.58  |
| 17       | 21.1  | 23.86  | 23.32   |

**Table S25.** Calculated (calc.) and experimental (exp.)  $^1\text{H}$  NMR chemical shift values of (1*R*, 4*R*, 5*S*, 6*R*, 7*R*, 10*S*, 11*R*\*)-8a and (1*R*, 4*R*, 5*S*, 6*R*, 7*R*, 10*S*, 11*S*\*)-8b at the mPW1PW91/6-311+G (d, p) level in chloroform

| Position | exp. | calc.a | calc. b |
|----------|------|--------|---------|
| 1        | 2.45 | 2.62   | 2.59    |
| 2a       | 1.79 | 1.77   | 1.88    |
| 2b       | 1.64 | 1.58   | 1.63    |
| 3a       | 1.58 | 1.81   | 1.63    |
| 3b       | 1.53 | 1.56   | 1.50    |
| 5        | 2.78 | 2.19   | 2.22    |
| 6        | 4.26 | 5.29   | 4.60    |
| 7        | 1.70 | 0.74   | 0.81    |
| 8a       | 1.73 | 1.86   | 2.33    |
| 8b       | 1.58 | 1.81   | 1.69    |
| 9a       | 1.51 | 1.76   | 1.97    |
| 9b       | 1.48 | 1.32   | 1.28    |
| 12a      | 3.98 | 5.10   | 5.13    |
| 12b      | 3.89 | 3.37   | 3.23    |
| 13a      | 1.27 | 1.14   | 1.35    |
| 13b      | 1.27 | 1.48   | 1.50    |

|     |      |      |      |
|-----|------|------|------|
| 13c | 1.27 | 1.18 | 1.36 |
| 14a | 1.18 | 1.09 | 1.14 |
| 14b | 1.18 | 1.28 | 1.27 |
| 14c | 1.18 | 1.15 | 1.19 |
| 15a | 1.36 | 1.77 | 1.29 |
| 15b | 1.36 | 1.65 | 1.28 |
| 15c | 1.36 | 1.13 | 1.36 |
| 17a | 2.08 | 1.72 | 2.04 |
| 17b | 2.08 | 2.14 | 1.83 |
| 17c | 2.08 | 2.22 | 2.18 |

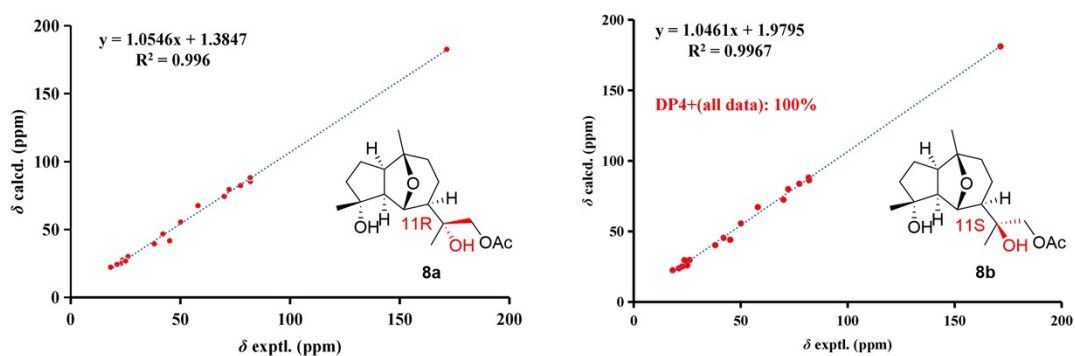

**Figure S122.** Linear correlations between the experimental and calculated  $^{13}\text{C}$  NMR chemical shifts for two possible isomers of (1*R*, 4*R*, 5*S*, 6*R*, 7*R*, 10*S*, 11*R*<sup>\*</sup>)-**8a** and (1*R*, 4*R*, 5*S*, 6*R*, 7*R*, 10*S*, 11*S*<sup>\*</sup>)-**8b** at the PCM/ mPW1PW91/6-311+G (d, p) level.

**Table S26.** Energy analysis for (1*R*, 4*R*, 5*S*, 6*S*, 7*R*, 11*R*<sup>\*</sup>)-**11a** and (1*R*, 4*R*, 5*S*, 6*S*, 7*R*, 11*S*<sup>\*</sup>)-**11b**

| Conf. | G(Hartree) | $\Delta\text{G}(\text{kcal/mol})$ | Boltzann Distribution |
|-------|------------|-----------------------------------|-----------------------|
| a     |            |                                   |                       |
| a1    | 0.359776   | 0.00                              | 0.485                 |
| a2    | 0.360162   | 0.24                              | 0.218                 |
| a3    | 0.359779   | 0.00                              | 0.195                 |
| b     |            |                                   |                       |
| b1    | 0.359062   | 0.00                              | 0.603                 |
| b2    | 0.359062   | 0.00                              | 0.133                 |

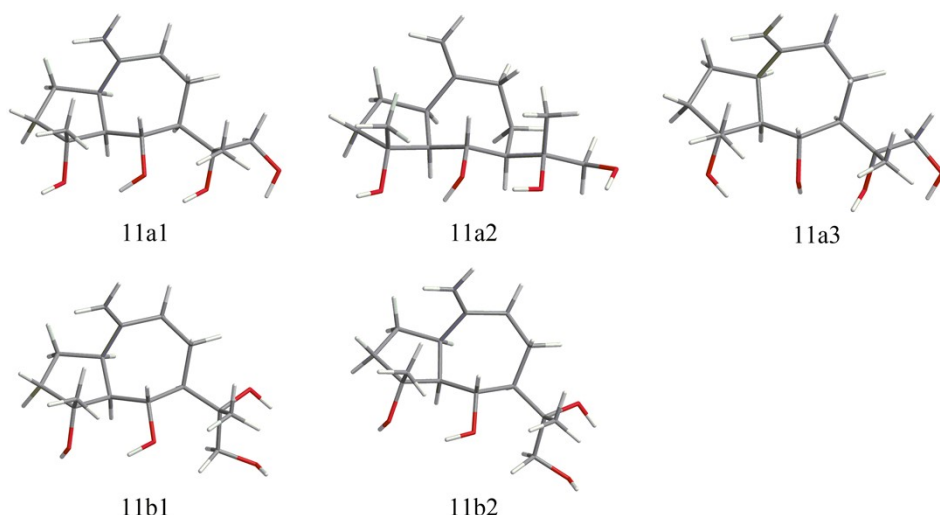

**Figure S123.** mPW1PW91/6-311+G (d, p) (chloroform) optimized lowest energy conformers for (1*R*, 4*R*, 5*S*, 6*S*, 7*R*, 11*R*<sup>\*</sup>)-11a and (1*R*, 4*R*, 5*S*, 6*S*, 7*R*, 11*S*<sup>\*</sup>)-11b

| Functional<br>mPW1PW91 |      | Solvent?<br>PCM |          | Basis Set<br>6-311+G(d, p) |          |          | Type of Data<br>Unscaled Shifts |   |
|------------------------|------|-----------------|----------|----------------------------|----------|----------|---------------------------------|---|
|                        |      | DP4+            | 100.00%  | 0.00%                      | -        | -        | -                               | - |
| Nuclei                 | sp2? | xperimental     | Isomer 1 | Isomer 2                   | Isomer 3 | Isomer 4 | Isomer 5                        |   |
| C                      |      | 41.7            | 46.54    | 51.22                      |          |          |                                 |   |
| C                      |      | 25.3            | 28.86    | 32.93                      |          |          |                                 |   |
| C                      |      | 40.8            | 44.94    | 46.26                      |          |          |                                 |   |
| C                      |      | 81.2            | 85.74    | 87.06                      |          |          |                                 |   |
| C                      |      | 57.0            | 57.47    | 67.59                      |          |          |                                 |   |
| C                      |      | 76.4            | 79.06    | 78.23                      |          |          |                                 |   |
| C                      |      | 53.8            | 57.23    | 53.84                      |          |          |                                 |   |
| C                      |      | 29.4            | 32.14    | 34.12                      |          |          |                                 |   |
| C                      |      | 39.5            | 43.64    | 44.73                      |          |          |                                 |   |
| C                      |      | 149.4           | 162.47   | 165.72                     |          |          |                                 |   |
| C                      |      | 77.3            | 77.71    | 76.18                      |          |          |                                 |   |
| C                      |      | 67.4            | 72.78    | 75.29                      |          |          |                                 |   |
| C                      |      | 26.0            | 20.77    | 19.46                      |          |          |                                 |   |
| C                      | x    | 109.8           | 115.28   | 114.23                     |          |          |                                 |   |
| C                      |      | 22.9            | 23.96    | 28.34                      |          |          |                                 |   |
| H                      |      | 2.91            | 3.06     | 2.83                       |          |          |                                 |   |
| H                      |      | 1.80            | 1.85     | 2.16                       |          |          |                                 |   |
| H                      |      | 1.76            | 1.70     | 1.79                       |          |          |                                 |   |
| H                      |      | 1.82            | 1.94     | 2.19                       |          |          |                                 |   |
| H                      |      | 1.78            | 1.71     | 1.81                       |          |          |                                 |   |
| H                      |      | 2.20            | 2.23     | 2.01                       |          |          |                                 |   |
| H                      |      | 3.92            | 4.10     | 3.72                       |          |          |                                 |   |
| H                      |      | 1.88            | 1.72     | 1.76                       |          |          |                                 |   |
| H                      |      | 1.92            | 1.64     | 2.73                       |          |          |                                 |   |
| H                      |      | 1.36            | 1.15     | 1.19                       |          |          |                                 |   |
| H                      |      | 2.46            | 2.53     | 2.46                       |          |          |                                 |   |
| H                      |      | 1.94            | 1.92     | 2.03                       |          |          |                                 |   |
| H                      |      | 3.81            | 3.44     | 4.76                       |          |          |                                 |   |
| H                      |      | 3.48            | 3.43     | 3.15                       |          |          |                                 |   |
| H                      |      | 1.21            | 1.39     | 1.01                       |          |          |                                 |   |
| H                      |      | 1.21            | 1.28     | 1.12                       |          |          |                                 |   |
| H                      |      | 1.21            | 1.48     | 1.43                       |          |          |                                 |   |
| H                      |      | 4.90            | 5.36     | 5.17                       |          |          |                                 |   |
| H                      |      | 4.83            | 5.23     | 4.94                       |          |          |                                 |   |
| H                      |      | 1.28            | 1.62     | 1.38                       |          |          |                                 |   |
| H                      |      | 1.28            | 1.02     | 1.38                       |          |          |                                 |   |
| H                      |      | 1.28            | 1.58     | 1.18                       |          |          |                                 |   |

| Functional<br>mPW1PW91 |  | Solvent?<br>PCM |          | Basis Set<br>6-311+G(d, p) |          |          | Type of Data<br>Unscaled Shifts |  |
|------------------------|--|-----------------|----------|----------------------------|----------|----------|---------------------------------|--|
|                        |  | Isomer 1        | Isomer 2 | Isomer 3                   | Isomer 4 | Isomer 5 | Isomer 6                        |  |
| sDP4+ (H data)         |  | 99.64%          | 0.36%    | -                          | -        | -        | -                               |  |
| sDP4+ (C data)         |  | 100.00%         | 0.00%    | -                          | -        | -        | -                               |  |
| sDP4+ (all data)       |  | 100.00%         | 0.00%    | -                          | -        | -        | -                               |  |
| uDP4+ (H data)         |  | 85.57%          | 14.43%   | -                          | -        | -        | -                               |  |
| uDP4+ (C data)         |  | 100.00%         | 0.00%    | -                          | -        | -        | -                               |  |
| uDP4+ (all data)       |  | 100.00%         | 0.00%    | -                          | -        | -        | -                               |  |
| DP4+ (H data)          |  | 99.94%          | 0.06%    | -                          | -        | -        | -                               |  |
| DP4+ (C data)          |  | 100.00%         | 0.00%    | -                          | -        | -        | -                               |  |
| DP4+ (all data)        |  | 100.00%         | 0.00%    | -                          | -        | -        | -                               |  |

**Figure S124.** DP4+ evaluation of theoretical and experimental data for (1*R*, 4*R*, 5*S*, 6*S*, 7*R*, 11*R*<sup>\*</sup>)-11a and (1*R*, 4*R*, 5*S*, 6*S*, 7*R*, 11*S*<sup>\*</sup>)-11b

**Table S27.** Calculated (calc.) and experimental (exp.)  $^{13}\text{C}$  NMR chemical shift values of (1*R*, 4*R*, 5*S*, 6*S*, 7*R*, 11*R*<sup>\*</sup>)-**11a** and (1*R*, 4*R*, 5*S*, 6*S*, 7*R*, 11*S*<sup>\*</sup>)-**11b** at the mPW1PW91/6-311+G(d, p) level in chloroform

| Position | exp.  | calc.a | calc. b |
|----------|-------|--------|---------|
| 1        | 41.7  | 46.54  | 51.22   |
| 2        | 25.3  | 28.86  | 32.93   |
| 3        | 40.8  | 44.94  | 46.26   |
| 4        | 81.2  | 85.74  | 87.06   |
| 5        | 57.0  | 57.47  | 67.59   |
| 6        | 76.4  | 79.06  | 78.23   |
| 7        | 53.8  | 57.23  | 53.84   |
| 8        | 29.4  | 32.14  | 34.12   |
| 9        | 39.5  | 43.64  | 44.73   |
| 10       | 149.4 | 162.47 | 165.72  |
| 11       | 77.3  | 77.71  | 76.18   |
| 12       | 67.4  | 72.78  | 75.29   |
| 13       | 26.0  | 20.77  | 19.46   |
| 14       | 109.8 | 115.28 | 114.23  |
| 15       | 22.9  | 23.96  | 28.34   |

**Table S28.** Calculated (calc.) and experimental (exp.)  $^1\text{H}$  NMR chemical shift values of (1*R*, 4*R*, 5*S*, 6*S*, 7*R*, 11*R*<sup>\*</sup>)-**11a** and (1*R*, 4*R*, 5*S*, 6*S*, 7*R*, 11*S*<sup>\*</sup>)-**11b** at the mPW1PW91/6-311+G (d, p) level in chloroform

| Position | exp. | calc.a | calc. b |
|----------|------|--------|---------|
| 1        | 2.91 | 3.06   | 2.83    |
| 2a       | 1.80 | 1.85   | 2.16    |
| 2b       | 1.76 | 1.70   | 1.79    |
| 3a       | 1.82 | 1.94   | 2.19    |
| 3b       | 1.78 | 1.71   | 1.81    |
| 5        | 2.20 | 2.23   | 2.01    |
| 6        | 3.92 | 4.10   | 3.72    |
| 7        | 1.88 | 1.72   | 1.76    |
| 8a       | 1.92 | 1.64   | 2.73    |
| 8b       | 1.36 | 1.15   | 1.19    |
| 9a       | 2.46 | 2.53   | 2.46    |
| 9b       | 1.94 | 1.92   | 2.03    |
| 12a      | 3.81 | 3.44   | 4.76    |
| 12b      | 3.48 | 3.43   | 3.15    |
| 13a      | 1.21 | 1.39   | 1.01    |
| 13b      | 1.21 | 1.28   | 1.12    |
| 13c      | 1.21 | 1.48   | 1.43    |
| 14a      | 4.90 | 5.36   | 5.17    |

|     |      |      |      |
|-----|------|------|------|
| 14b | 4.83 | 5.23 | 4.94 |
| 14c | 1.28 | 1.62 | 1.38 |
| 15a | 1.28 | 1.02 | 1.38 |
| 15b | 1.28 | 1.58 | 1.18 |

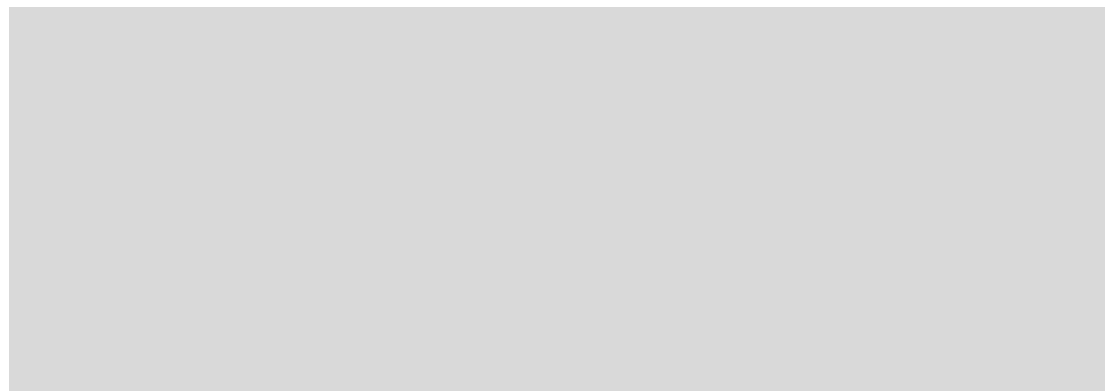

**Figure S125.** Linear correlations between the experimental and calculated  $^{13}\text{C}$  NMR chemical shifts for two possible isomers of (1*R*, 4*R*, 5*S*, 6*S*, 7*R*, 11*R*<sup>\*</sup>)-**11a** and (1*R*, 4*R*, 5*S*, 6*S*, 7*R*, 11*S*<sup>\*</sup>)-**11b** at the PCM/ mPW1PW91/6-311+G (d, p) level.

**Table S29.** Energy analysis for (1*R*, 4*R*, 5*S*, 6*S*, 7*R*, 11*R*<sup>\*</sup>)-**12a** and (1*R*, 4*R*, 5*S*, 6*S*, 7*R*, 11*S*<sup>\*</sup>)-**12b**

| Conf. | G(Hartree) | $\Delta\text{G}(\text{kcal/mol})$ | Boltzmann Distribution |
|-------|------------|-----------------------------------|------------------------|
| a     |            |                                   |                        |
| a1    | 0.361596   | 0.00                              | 0.739                  |
| a2    | 0.35926    | -1.47                             | 0.131                  |
| b     |            |                                   |                        |
| b1    | 0.359382   | 0.00                              | 0.684                  |
| b2    | 0.36001    | 0.39                              | 0.116                  |

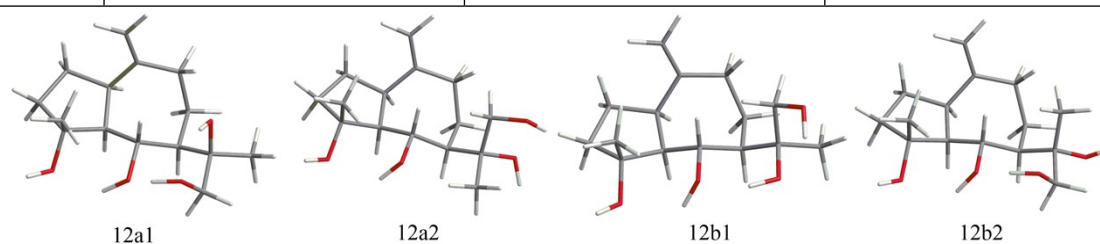

**Figure S126.** mPW1PW91/6-311+G (d, p) (chloroform) optimized lowest energy conformers for (1*R*, 4*R*, 5*S*, 6*S*, 7*R*, 11*R*<sup>\*</sup>)-**12a** and (1*R*, 4*R*, 5*S*, 6*S*, 7*R*, 11*S*<sup>\*</sup>)-**12b**

| Functional<br>mPW1PW91 |      | Solvent?<br>PCM |          | Basis Set<br>6-311+G(d,p) |          | Type of Data<br>Unscaled Shifts |          |
|------------------------|------|-----------------|----------|---------------------------|----------|---------------------------------|----------|
|                        |      | DP4+            | 0.00%    | 100.00%                   | -        | -                               | -        |
| Nuclei                 | sp2? | Experimental    | Isomer 1 | Isomer 2                  | Isomer 3 | Isomer 4                        | Isomer 5 |
| C                      |      | 41.6            | 45.35    | 44.96                     |          |                                 |          |
| C                      |      | 25.1            | 28.76    | 29.14                     |          |                                 |          |
| C                      |      | 41.0            | 44.96    | 44.86                     |          |                                 |          |
| C                      |      | 81.6            | 85.59    | 85.91                     |          |                                 |          |
| C                      |      | 56.8            | 54.36    | 53.96                     |          |                                 |          |
| C                      |      | 75.6            | 72.03    | 73.72                     |          |                                 |          |
| C                      |      | 49.0            | 59.24    | 58.18                     |          |                                 |          |
| C                      |      | 29.1            | 26.49    | 26.32                     |          |                                 |          |
| C                      |      | 38.8            | 39.25    | 41.26                     |          |                                 |          |
| C                      |      | 149.5           | 162.10   | 161.55                    |          |                                 |          |
| C                      |      | 77.3            | 77.69    | 78.30                     |          |                                 |          |
| C                      |      | 69.8            | 69.59    | 72.83                     |          |                                 |          |
| C                      |      | 20.3            | 29.98    | 27.01                     |          |                                 |          |
| C                      | x    | 109.4           | 113.53   | 113.44                    |          |                                 |          |
| C                      |      | 22.6            | 23.93    | 23.93                     |          |                                 |          |
| H                      |      | 2.91            | 3.13     | 3.13                      |          |                                 |          |
| H                      |      | 1.79            | 1.86     | 1.89                      |          |                                 |          |
| H                      |      | 1.75            | 1.62     | 1.67                      |          |                                 |          |
| H                      |      | 1.77            | 1.91     | 1.96                      |          |                                 |          |
| H                      |      | 1.77            | 1.65     | 1.70                      |          |                                 |          |
| H                      |      | 2.18            | 2.11     | 2.22                      |          |                                 |          |
| H                      |      | 3.94            | 3.75     | 4.19                      |          |                                 |          |
| H                      |      | 1.99            | 1.79     | 1.84                      |          |                                 |          |
| H                      |      | 1.84            | 2.25     | 2.08                      |          |                                 |          |
| H                      |      | 1.23            | 1.85     | 1.89                      |          |                                 |          |
| H                      |      | 2.47            | 2.51     | 2.38                      |          |                                 |          |
| H                      |      | 1.93            | 2.24     | 2.23                      |          |                                 |          |
| H                      |      | 3.58            | 3.83     | 3.55                      |          |                                 |          |
| H                      |      | 3.41            | 3.46     | 3.49                      |          |                                 |          |
| H                      |      | 1.22            | 2.08     | 1.46                      |          |                                 |          |
| H                      |      | 1.22            | 1.83     | 0.90                      |          |                                 |          |
| H                      |      | 1.22            | 0.67     | 1.66                      |          |                                 |          |
| H                      |      | 4.88            | 5.33     | 5.33                      |          |                                 |          |
| H                      |      | 4.81            | 5.21     | 5.19                      |          |                                 |          |
| H                      |      | 1.31            | 1.59     | 1.73                      |          |                                 |          |
| H                      |      | 1.31            | 0.93     | 0.99                      |          |                                 |          |
| H                      |      | 1.31            | 1.69     | 1.65                      |          |                                 |          |

| Functional<br>mPW1PW91 | Solvent?<br>PCM |          | Basis Set<br>6-311+G(d,p) |          | Type of Data<br>Unscaled Shifts |          |
|------------------------|-----------------|----------|---------------------------|----------|---------------------------------|----------|
|                        | Isomer 1        | Isomer 2 | Isomer 3                  | Isomer 4 | Isomer 5                        | Isomer 6 |
| sDP4+ (H data)         | 0.02%           | 99.98%   | -                         | -        | -                               | -        |
| sDP4+ (C data)         | 0.04%           | 99.96%   | -                         | -        | -                               | -        |
| sDP4+ (all data)       | 0.00%           | 100.00%  | -                         | -        | -                               | -        |
| uDP4+ (H data)         | 0.22%           | 99.78%   | -                         | -        | -                               | -        |
| uDP4+ (C data)         | 0.01%           | 99.99%   | -                         | -        | -                               | -        |
| uDP4+ (all data)       | 0.00%           | 100.00%  | -                         | -        | -                               | -        |
| DP4+ (H data)          | 0.00%           | 100.00%  | -                         | -        | -                               | -        |
| DP4+ (C data)          | 0.00%           | 100.00%  | -                         | -        | -                               | -        |
| DP4+ (all data)        | 0.00%           | 100.00%  | -                         | -        | -                               | -        |

**Figure S127.** DP4+ evaluation of theoretical and experimental data for (1*R*, 4*R*, 5*S*, 6*S*, 7*R*, 11*R*<sup>\*</sup>)-12a and (1*R*, 4*R*, 5*S*, 6*S*, 7*R*, 11*S*<sup>\*</sup>)-12b

**Table S30.** Calculated (calc.) and experimental (exp.)  $^{13}\text{C}$  NMR chemical shift values of (1*R*, 4*R*, 5*S*, 6*S*, 7*R*, 11*R*<sup>\*</sup>)-**12a** and (1*R*, 4*R*, 5*S*, 6*S*, 7*R*, 11*S*<sup>\*</sup>)-**12b** at the mPW1PW91/6-311+G(d, p) level in acetone

| Position | exp.  | calc.a | calc. b |
|----------|-------|--------|---------|
| 1        | 41.6  | 45.35  | 44.96   |
| 2        | 25.1  | 28.76  | 29.14   |
| 3        | 41.0  | 44.96  | 44.86   |
| 4        | 81.6  | 85.59  | 85.91   |
| 5        | 56.8  | 54.36  | 53.96   |
| 6        | 75.6  | 72.03  | 73.72   |
| 7        | 49.0  | 59.24  | 58.18   |
| 8        | 29.1  | 26.49  | 26.32   |
| 9        | 38.8  | 39.25  | 41.26   |
| 10       | 149.5 | 162.10 | 161.55  |
| 11       | 77.3  | 77.69  | 78.30   |
| 12       | 69.8  | 69.59  | 72.83   |
| 13       | 20.3  | 29.98  | 27.01   |
| 14       | 109.4 | 113.53 | 113.44  |
| 15       | 22.6  | 23.93  | 23.93   |

**Table S31.** Calculated (calc.) and experimental (exp.)  $^1\text{H}$  NMR chemical shift values of (1*R*, 4*R*, 5*S*, 6*S*, 7*R*, 11*R*<sup>\*</sup>)-**12a** and (1*R*, 4*R*, 5*S*, 6*S*, 7*R*, 11*S*<sup>\*</sup>)-**12b** at the mPW1PW91/6-311+G (d, p) level in acetone

| Position | exp. | calc.a | calc. b |
|----------|------|--------|---------|
| 1        | 2.91 | 3.13   | 3.13    |
| 2a       | 1.79 | 1.86   | 1.89    |
| 2b       | 1.75 | 1.62   | 1.67    |
| 3a       | 1.77 | 1.91   | 1.96    |
| 3b       | 1.77 | 1.65   | 1.70    |
| 5        | 2.18 | 2.11   | 2.22    |
| 6        | 3.94 | 3.75   | 4.19    |
| 7        | 1.99 | 1.79   | 1.84    |
| 8a       | 1.84 | 2.25   | 2.08    |
| 8b       | 1.23 | 1.85   | 1.89    |
| 9a       | 2.47 | 2.51   | 2.38    |
| 9b       | 1.93 | 2.24   | 2.23    |
| 12a      | 3.58 | 3.83   | 3.55    |
| 12b      | 3.41 | 3.46   | 3.49    |
| 13a      | 1.22 | 2.08   | 1.46    |
| 13b      | 1.22 | 1.83   | 0.90    |
| 13c      | 1.22 | 0.67   | 1.66    |
| 14a      | 4.88 | 5.33   | 5.33    |

|     |      |      |      |
|-----|------|------|------|
| 14b | 4.81 | 5.21 | 5.19 |
| 15a | 1.31 | 1.59 | 1.73 |
| 15b | 1.31 | 0.93 | 0.99 |
| 15c | 1.31 | 1.69 | 1.65 |

---

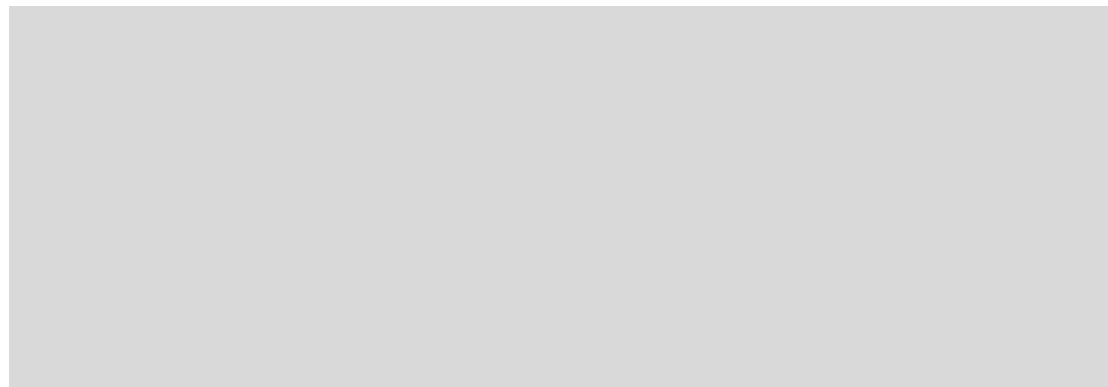

**Figure S128.** Linear correlations between the experimental and calculated  $^{13}\text{C}$  NMR chemical shifts for two possible isomers of (1*R*, 4*R*, 5*S*, 6*S*, 7*R*, 11*R*<sup>\*</sup>)-**12a** and (1*R*, 4*R*, 5*S*, 6*S*, 7*R*, 11*S*<sup>\*</sup>)-**12b** at the PCM/ mPW1PW91/6-311+G (d, p) level.
